# Supplementary material
Source: publisher figshare collection journal article supplement (https://acs.figshare.com/ndownloader/files/3848731)
Supplement: Supplementary file 1 [file 3848731]

 
data_cm48jsa_1 
 
_audit_creation_method            SHELXL-2014 
_audit_update_record 
; 
? 
; 
 
_chemical_name_systematic 
; 
? 
; 
 
_chemical_name_common            ? 
_chemical_melting_point          ? 
_chemical_formula_moiety         'C44 H45 Cl N4 Ni, C Cl2' 
_chemical_formula_sum 
 'C45 H45 Cl3 N4 Ni' 
_chemical_formula_structural     ? 
_chemical_formula_weight          806.91 
 
_chemical_formula_iupac          ? 
_chemical_formula_analytical     ? 
_chemical_compound_source        ? 
 
loop_ 
 _atom_type_symbol 
 _atom_type_description 
 _atom_type_scat_dispersion_real 
 _atom_type_scat_dispersion_imag 
 _atom_type_scat_source 
 'C'  'C'   0.0033   0.0016 
 'International Tables Vol C Tables 4.2.6.8 and 6.1.1.4' 
 'H'  'H'   0.0000   0.0000 
 'International Tables Vol C Tables 4.2.6.8 and 6.1.1.4' 
 'N'  'N'   0.0061   0.0033 
 'International Tables Vol C Tables 4.2.6.8 and 6.1.1.4' 
 'Cl'  'Cl'   0.1484   0.1585 
 'International Tables Vol C Tables 4.2.6.8 and 6.1.1.4' 
 'Ni'  'Ni'   0.3393   1.1124 
 'International Tables Vol C Tables 4.2.6.8 and 6.1.1.4' 
 
_space_group_crystal_system       monoclinic 
_space_group_IT_number            14 
_space_group_name_H-M_alt         'P 21/n' 
_space_group_name_Hall            '-P 2yn' 
 
_shelx_space_group_comment 
; 
The symmetry employed for this shelxl refinement is uniquely defined 
by the following loop, which should always be used as a source of 
symmetry information in preference to the above space-group names. 
They are only intended as comments. 
; 
 
loop_ 
 _space_group_symop_operation_xyz 
 'x, y, z' 
 '-x+1/2, y+1/2, -z+1/2' 
 '-x, -y, -z' 
 'x-1/2, -y-1/2, z-1/2' 
 
_cell_length_a                    19.2462(17) 
_cell_length_b                    8.9294(8) 
_cell_length_c                    23.630(2) 
_cell_angle_alpha                 90 
_cell_angle_beta                  96.786(5) 
_cell_angle_gamma                 90 
_cell_volume                      4032.5(6) 
_cell_formula_units_Z             4 
_cell_measurement_temperature     173(2) 
_cell_measurement_reflns_used    9891 
_cell_measurement_theta_min        2.44 
_cell_measurement_theta_max       26.11 
_exptl_crystal_description       'rod' 
_exptl_crystal_colour            'orange' 
_exptl_crystal_density_meas      ? 
_exptl_crystal_density_method    'not measured' 
_exptl_crystal_density_diffrn     1.329 
_exptl_crystal_F_000              1688 
_exptl_transmission_factor_min    ? 
_exptl_transmission_factor_max    ? 
_exptl_crystal_size_max          0.857 
_exptl_crystal_size_mid          0.379 
_exptl_crystal_size_min          0.24 
_exptl_crystal_id                cm48jsa 
 
_exptl_crystal_preparation 
; 
The data crystal was mounted using oil (Parantone-N, Exxon) to a 
0.3 mm cryo-loop (Hampton Research) 
with the (2, -1, -4) scattering 
planes roughly normal to the spindle axis. 
; 
_exptl_absorpt_coefficient_mu     0.717 
_shelx_estimated_absorpt_T_min    0.579 
_shelx_estimated_absorpt_T_max    0.847 
_exptl_absorpt_correction_type   'integration' 
_exptl_absorpt_correction_T_min  0.64559 
_exptl_absorpt_correction_T_max  0.86758 
_exptl_absorpt_process_details   'SHELXTL/XPREP V2013/3 (Bruker, 2013)' 
 
_exptl_special_details 
; 
 
One distinct cell was identified using APEX2 
(Bruker, 2013).  Thirteen frame series were integrated and 
filtered for statistical outliers using SAINT (Bruker, 2013) then 
corrected for absorption by integration using 
SAINT/SADABS v2012/1 (Bruker, 2012) to sort, merge, and scale 
the combined data.  No decay correction was applied. 
; 
 
_diffrn_ambient_temperature       173(2) 
_diffrn_radiation_wavelength      0.71073 
_diffrn_radiation_wavelength_id  cm48jsa 
_diffrn_radiation_type           'MoK\a' 
_diffrn_radiation_source         'fine-focus sealed tube' 
_diffrn_radiation_monochromator  'graphite' 
_diffrn_source                    ? 
_diffrn_standards_number         ? 
_diffrn_standards_decay_%        ? 
_diffrn_standards_interval_time  ? 
 
_diffrn_measurement_device_type   ? 
_diffrn_measurement_device       'Bruker Kappa/ApexII CCD' 
_diffrn_measurement_method       'profile data from \f and \w scans' 
_diffrn_detector_area_resol_mean  ? 
_diffrn_reflns_number            132179 
 
_diffrn_reflns_av_unetI/netI      0.0413 
_diffrn_reflns_av_R_equivalents   0.0970 
_diffrn_reflns_limit_h_min        -25 
_diffrn_reflns_limit_h_max        25 
_diffrn_reflns_limit_k_min        -11 
_diffrn_reflns_limit_k_max        11 
_diffrn_reflns_limit_l_min        -31 
_diffrn_reflns_limit_l_max        31 
_diffrn_reflns_theta_min          1.452 
_diffrn_reflns_theta_max          28.497 
_diffrn_reflns_theta_full         25.242 
_diffrn_measured_fraction_theta_max   0.993 
_diffrn_measured_fraction_theta_full  1.000 
_diffrn_reflns_Laue_measured_fraction_max    0.993 
_diffrn_reflns_Laue_measured_fraction_full   1.000 
_diffrn_reflns_point_group_measured_fraction_max   0.993 
_diffrn_reflns_point_group_measured_fraction_full  1.000 
_reflns_number_total              10140 
_reflns_number_gt                 8172 
_reflns_threshold_expression      'I > 2\s(I)' 
_reflns_Friedel_coverage          0.000 
_reflns_Friedel_fraction_max      . 
_reflns_Friedel_fraction_full     . 
 
_reflns_special_details 
; 
 Reflections were merged by SHELXL according to the crystal 
 class for the calculation of statistics and refinement. 
 
 _reflns_Friedel_fraction is defined as the number of unique 
 Friedel pairs measured divided by the number that would be 
 possible theoretically, ignoring centric projections and 
 systematic absences. 
; 
 
_computing_data_collection       'APEX2 V2013.10-0 (Bruker, 2013)' 
 
_computing_cell_refinement       'SAINT V8.34A (Bruker, 2005)' 
_computing_data_reduction 
; 
SAINT V8.34A, XPREP v2013/3, SADABS V2012/1, TWINABS V2012/1 
(Bruker, 2012 & 2013) 
; 
_computing_structure_solution    'SHELX-2013-4 (Sheldrick, 2013)' 
_computing_structure_refinement  'SHELX-2013-4 (Sheldrick, 2013)' 
_computing_molecular_graphics 
; 
SHELXTL v2013-4 (Bruker, 2013), CrystalMaker v2.7.3 (CrystalMaker, 1994) 
; 
_computing_publication_material  'XCIF V2013-1 (Bruker, 2013)' 
 
_refine_special_details 
; 
Structure was phased by direct methods (Sheldrick, 
2008).  Systematic conditions suggested the unambiguous space group. 
The space group choice was confirmed by successful convergence of the 
full-matrix least-squares refinement on F^2^.  The highest peaks in 
the final difference Fourier map were in the vicinity of the chlorine atoms of 
the dichloromethane that has cocrystallized and the metal center; the 
final map had no other significant features.  A final analysis of 
variance between observed and calculated structure factors showed little 
dependence on amplitude and resolution. 
 
 
; 
 
_refine_ls_structure_factor_coef  Fsqd 
_refine_ls_matrix_type            full 
_refine_ls_weighting_scheme       calc 
_refine_ls_weighting_details 
'w=1/[\s^2^(Fo^2^)+(0.0350P)^2^+2.7714P] where P=(Fo^2^+2Fc^2^)/3' 
_atom_sites_solution_primary      ? 
_atom_sites_solution_secondary    ? 
_atom_sites_solution_hydrogens    geom 
_refine_ls_hydrogen_treatment     constr 
_refine_ls_extinction_method      none 
_refine_ls_extinction_coef        . 
_refine_ls_number_reflns          10140 
_refine_ls_number_parameters      534 
_refine_ls_number_restraints      211 
_refine_ls_R_factor_all           0.0513 
_refine_ls_R_factor_gt            0.0370 
_refine_ls_wR_factor_ref          0.0981 
_refine_ls_wR_factor_gt           0.0896 
_refine_ls_goodness_of_fit_ref    1.030 
_refine_ls_restrained_S_all       1.035 
_refine_ls_shift/su_max           0.001 
_refine_ls_shift/su_mean          0.000 
 
loop_ 
 _atom_site_label 
 _atom_site_type_symbol 
 _atom_site_fract_x 
 _atom_site_fract_y 
 _atom_site_fract_z 
 _atom_site_U_iso_or_equiv 
 _atom_site_adp_type 
 _atom_site_occupancy 
 _atom_site_site_symmetry_order 
 _atom_site_calc_flag 
 _atom_site_refinement_flags_posn 
 _atom_site_refinement_flags_adp 
 _atom_site_refinement_flags_occupancy 
 _atom_site_disorder_assembly 
 _atom_site_disorder_group 
Ni1 Ni 0.67235(2) 0.46906(2) 0.01049(2) 0.01784(6) Uani 1 1 d . . . . . 
Cl1 Cl 0.75278(3) 0.33568(6) -0.02421(2) 0.03602(12) Uani 1 1 d . . . . . 
N1 N 0.65135(7) 0.59008(15) -0.11243(6) 0.0186(3) Uani 1 1 d . . . . . 
N2 N 0.57815(7) 0.65769(15) -0.05435(6) 0.0195(3) Uani 1 1 d . . . . . 
N3 N 0.63720(7) 0.46337(16) 0.12242(6) 0.0209(3) Uani 1 1 d . . . . . 
N4 N 0.72478(7) 0.31061(16) 0.12307(6) 0.0208(3) Uani 1 1 d . . . . . 
C1 C 0.63741(8) 0.57391(18) -0.05788(7) 0.0186(3) Uani 1 1 d . . . . . 
C2 C 0.60096(9) 0.68023(18) -0.14318(7) 0.0210(3) Uani 1 1 d . . . . . 
C3 C 0.59296(9) 0.7243(2) -0.19971(8) 0.0264(4) Uani 1 1 d . . . . . 
H3A H 0.6251 0.6945 -0.2251 0.032 Uiso 1 1 calc R U . . . 
C4 C 0.53594(10) 0.8137(2) -0.21747(8) 0.0314(4) Uani 1 1 d . . . . . 
H4A H 0.5281 0.8445 -0.2562 0.038 Uiso 1 1 calc R U . . . 
C5 C 0.48957(10) 0.8599(2) -0.17983(9) 0.0319(4) Uani 1 1 d . . . . . 
H5A H 0.4514 0.9227 -0.1934 0.038 Uiso 1 1 calc R U . . . 
C6 C 0.49768(9) 0.8168(2) -0.12347(8) 0.0273(4) Uani 1 1 d . . . . . 
H6A H 0.4661 0.8488 -0.0979 0.033 Uiso 1 1 calc R U . . . 
C7 C 0.55403(9) 0.72442(18) -0.10569(7) 0.0208(3) Uani 1 1 d . . . . . 
C8 C 0.55491(9) 0.65832(18) 0.00058(7) 0.0198(3) Uani 1 1 d . . . . . 
C9 C 0.49786(9) 0.7313(2) 0.01805(8) 0.0248(4) Uani 1 1 d . . . . . 
H9A H 0.4675 0.7901 -0.0077 0.030 Uiso 1 1 calc R U . . . 
C10 C 0.48652(9) 0.7154(2) 0.07486(8) 0.0272(4) Uani 1 1 d . . . . . 
H10A H 0.4477 0.7651 0.0878 0.033 Uiso 1 1 calc R U . . . 
C11 C 0.52988(9) 0.6296(2) 0.11315(8) 0.0257(4) Uani 1 1 d . . . . . 
H11A H 0.5213 0.6198 0.1518 0.031 Uiso 1 1 calc R U . . . 
C12 C 0.58631(9) 0.55848(18) 0.09293(7) 0.0208(3) Uani 1 1 d . . . . . 
C13 C 0.59932(9) 0.57226(18) 0.03697(7) 0.0197(3) Uani 1 1 d . . . . . 
C14 C 0.64924(9) 0.41039(19) 0.17787(7) 0.0238(3) Uani 1 1 d . . . . . 
C15 C 0.61802(11) 0.4376(2) 0.22724(8) 0.0315(4) Uani 1 1 d . . . . . 
H15A H 0.5803 0.5062 0.2277 0.038 Uiso 1 1 calc R U . . . 
C16 C 0.64477(12) 0.3596(3) 0.27558(8) 0.0389(5) Uani 1 1 d . . . . . 
H16A H 0.6250 0.3755 0.3101 0.047 Uiso 1 1 calc R U . . . 
C17 C 0.69973(12) 0.2586(3) 0.27511(8) 0.0393(5) Uani 1 1 d . . . . . 
H17A H 0.7161 0.2065 0.3092 0.047 Uiso 1 1 calc R U . . . 
C18 C 0.73114(11) 0.2320(2) 0.22651(8) 0.0330(4) Uani 1 1 d . . . . . 
H18A H 0.7688 0.1633 0.2263 0.040 Uiso 1 1 calc R U . . . 
C19 C 0.70498(10) 0.3108(2) 0.17812(7) 0.0244(4) Uani 1 1 d . . . . . 
C20 C 0.68366(9) 0.40313(18) 0.08838(7) 0.0202(3) Uani 1 1 d . . . . . 
C21 C 0.71038(9) 0.53344(18) -0.13871(7) 0.0195(3) Uani 1 1 d . . . . . 
C22 C 0.77510(9) 0.60445(19) -0.12668(7) 0.0224(3) Uani 1 1 d . . . . . 
C23 C 0.82863(10) 0.5558(2) -0.15682(8) 0.0302(4) Uani 1 1 d . . . . . 
H23A H 0.8736 0.6002 -0.1494 0.036 Uiso 1 1 calc R U . . . 
C24 C 0.81761(11) 0.4440(2) -0.19740(9) 0.0342(4) Uani 1 1 d . . . . . 
H24A H 0.8544 0.4154 -0.2186 0.041 Uiso 1 1 calc R U . . . 
C25 C 0.75384(10) 0.3741(2) -0.20719(8) 0.0307(4) Uani 1 1 d . . . . . 
H25A H 0.7473 0.2959 -0.2346 0.037 Uiso 1 1 calc R U . . . 
C26 C 0.69857(9) 0.4163(2) -0.17747(7) 0.0227(3) Uani 1 1 d . . . . . 
C27 C 0.78738(10) 0.7294(2) -0.08352(8) 0.0288(4) Uani 1 1 d . . . . . 
H27A H 0.7568 0.7101 -0.0529 0.035 Uiso 1 1 calc R U . . . 
C28 C 0.76549(13) 0.8793(2) -0.11102(11) 0.0456(5) Uani 1 1 d . . . . . 
H28A H 0.7737 0.9592 -0.0826 0.068 Uiso 1 1 calc R U . . . 
H28B H 0.7930 0.8988 -0.1426 0.068 Uiso 1 1 calc R U . . . 
H28C H 0.7157 0.8761 -0.1255 0.068 Uiso 1 1 calc R U . . . 
C29 C 0.86279(12) 0.7363(3) -0.05536(10) 0.0453(5) Uani 1 1 d . . . . . 
H29A H 0.8678 0.8189 -0.0279 0.068 Uiso 1 1 calc R U . . . 
H29B H 0.8748 0.6417 -0.0356 0.068 Uiso 1 1 calc R U . . . 
H29C H 0.8942 0.7526 -0.0845 0.068 Uiso 1 1 calc R U . . . 
C30 C 0.63069(10) 0.3293(2) -0.18555(8) 0.0291(4) Uani 1 1 d . . . . . 
H30A H 0.5984 0.3748 -0.1601 0.035 Uiso 1 1 calc R U . . . 
C31 C 0.64448(13) 0.1674(2) -0.16641(10) 0.0408(5) Uani 1 1 d . . . . . 
H31A H 0.6006 0.1108 -0.1716 0.061 Uiso 1 1 calc R U . . . 
H31B H 0.6781 0.1217 -0.1893 0.061 Uiso 1 1 calc R U . . . 
H31C H 0.6636 0.1658 -0.1261 0.061 Uiso 1 1 calc R U . . . 
C32 C 0.59450(13) 0.3368(3) -0.24663(10) 0.0474(6) Uani 1 1 d . . . . . 
H32A H 0.5510 0.2788 -0.2495 0.071 Uiso 1 1 calc R U . . . 
H32B H 0.5838 0.4413 -0.2569 0.071 Uiso 1 1 calc R U . . . 
H32C H 0.6255 0.2949 -0.2727 0.071 Uiso 1 1 calc R U . . . 
C33 C 0.77817(9) 0.21218(19) 0.10672(7) 0.0215(3) Uani 1 1 d . . . . . 
C34 C 0.75743(9) 0.0748(2) 0.08268(7) 0.0242(3) Uani 1 1 d . . . . . 
C35 C 0.81020(10) -0.0212(2) 0.06926(8) 0.0299(4) Uani 1 1 d . . . . . 
H35A H 0.7981 -0.1166 0.0532 0.036 Uiso 1 1 calc R U . . . 
C36 C 0.87945(11) 0.0199(2) 0.07896(9) 0.0342(4) Uani 1 1 d . . . . . 
H36A H 0.9146 -0.0468 0.0693 0.041 Uiso 1 1 calc R U . . . 
C37 C 0.89824(10) 0.1576(2) 0.10264(9) 0.0341(4) Uani 1 1 d . . . . . 
H37A H 0.9463 0.1845 0.1090 0.041 Uiso 1 1 calc R U . . . 
C38 C 0.84788(10) 0.2575(2) 0.11729(8) 0.0274(4) Uani 1 1 d D . . . . 
C39 C 0.68132(10) 0.0298(2) 0.07130(9) 0.0304(4) Uani 1 1 d . . . . . 
H39A H 0.6527 0.1209 0.0770 0.036 Uiso 1 1 calc R U . . . 
C40 C 0.66149(12) -0.0228(3) 0.01040(10) 0.0427(5) Uani 1 1 d . . . . . 
H40A H 0.6119 -0.0507 0.0050 0.064 Uiso 1 1 calc R U . . . 
H40B H 0.6697 0.0581 -0.0160 0.064 Uiso 1 1 calc R U . . . 
H40C H 0.6900 -0.1099 0.0029 0.064 Uiso 1 1 calc R U . . . 
C41 C 0.66346(13) -0.0871(3) 0.11422(10) 0.0470(6) Uani 1 1 d . . . . . 
H41A H 0.6140 -0.1147 0.1061 0.071 Uiso 1 1 calc R U . . . 
H41B H 0.6926 -0.1761 0.1113 0.071 Uiso 1 1 calc R U . . . 
H41C H 0.6723 -0.0457 0.1528 0.071 Uiso 1 1 calc R U . . . 
C42 C 0.8671(4) 0.4115(5) 0.1408(2) 0.0354(14) Uani 0.697(17) 1 d D U P A 1 
H42A H 0.8288 0.4432 0.1633 0.042 Uiso 0.697(17) 1 calc R U P A 1 
C43 C 0.8690(5) 0.5250(6) 0.0932(2) 0.0542(15) Uani 0.697(17) 1 d D U P A 1 
H43A H 0.8816 0.6236 0.1096 0.081 Uiso 0.697(17) 1 calc R U P A 1 
H43B H 0.9039 0.4943 0.0685 0.081 Uiso 0.697(17) 1 calc R U P A 1 
H43C H 0.8228 0.5306 0.0708 0.081 Uiso 0.697(17) 1 calc R U P A 1 
C44 C 0.9345(4) 0.4135(10) 0.1813(4) 0.080(2) Uani 0.697(17) 1 d D U P A 1 
H44A H 0.9441 0.5159 0.1951 0.120 Uiso 0.697(17) 1 calc R U P A 1 
H44B H 0.9296 0.3476 0.2138 0.120 Uiso 0.697(17) 1 calc R U P A 1 
H44C H 0.9732 0.3784 0.1613 0.120 Uiso 0.697(17) 1 calc R U P A 1 
C42B C 0.8677(10) 0.4093(12) 0.1424(5) 0.042(3) Uani 0.303(17) 1 d D U P A 2 
H42B H 0.8239 0.4639 0.1486 0.051 Uiso 0.303(17) 1 calc R U P A 2 
C43B C 0.9058(12) 0.4992(15) 0.1012(6) 0.062(3) Uani 0.303(17) 1 d D U P A 2 
H43D H 0.9185 0.5975 0.1178 0.092 Uiso 0.303(17) 1 calc R U P A 2 
H43E H 0.9483 0.4458 0.0939 0.092 Uiso 0.303(17) 1 calc R U P A 2 
H43F H 0.8752 0.5125 0.0654 0.092 Uiso 0.303(17) 1 calc R U P A 2 
C44B C 0.9125(11) 0.394(2) 0.1995(6) 0.072(4) Uani 0.303(17) 1 d D U P A 2 
H44D H 0.9247 0.4934 0.2150 0.109 Uiso 0.303(17) 1 calc R U P A 2 
H44E H 0.8863 0.3390 0.2260 0.109 Uiso 0.303(17) 1 calc R U P A 2 
H44F H 0.9554 0.3387 0.1944 0.109 Uiso 0.303(17) 1 calc R U P A 2 
C50 C 1.0996(5) 0.7952(18) 0.0696(5) 0.056(3) Uani 0.54(3) 1 d D U P B 1 
Cl51 Cl 1.0642(4) 0.8651(8) 0.1307(3) 0.0784(15) Uani 0.54(3) 1 d D U P B 1 
Cl52 Cl 1.0349(4) 0.6724(10) 0.0370(4) 0.0876(15) Uani 0.54(3) 1 d D U P B 1 
C50B C 1.0998(6) 0.7789(18) 0.0759(5) 0.044(2) Uani 0.46(3) 1 d D U P B 2 
Cl5B Cl 1.0746(5) 0.8773(7) 0.1358(3) 0.0559(12) Uani 0.46(3) 1 d D U P B 2 
Cl6B Cl 1.0287(4) 0.7121(16) 0.0287(3) 0.0742(18) Uani 0.46(3) 1 d D U P B 2 
 
loop_ 
 _atom_site_aniso_label 
 _atom_site_aniso_U_11 
 _atom_site_aniso_U_22 
 _atom_site_aniso_U_33 
 _atom_site_aniso_U_23 
 _atom_site_aniso_U_13 
 _atom_site_aniso_U_12 
Ni1 0.01889(11) 0.01933(11) 0.01620(10) -0.00049(8) 0.00578(8) 0.00257(8) 
Cl1 0.0413(3) 0.0435(3) 0.0263(2) 0.00953(19) 0.01672(19) 0.0242(2) 
N1 0.0178(7) 0.0208(6) 0.0179(6) 0.0014(5) 0.0050(5) 0.0031(5) 
N2 0.0186(7) 0.0205(7) 0.0201(7) -0.0004(5) 0.0052(5) 0.0027(5) 
N3 0.0236(7) 0.0228(7) 0.0176(6) -0.0016(5) 0.0077(5) -0.0007(6) 
N4 0.0241(7) 0.0227(7) 0.0157(6) -0.0007(5) 0.0029(5) 0.0003(6) 
C1 0.0177(8) 0.0180(7) 0.0209(8) -0.0024(6) 0.0054(6) -0.0004(6) 
C2 0.0195(8) 0.0213(8) 0.0228(8) 0.0021(6) 0.0045(6) 0.0005(6) 
C3 0.0249(9) 0.0310(9) 0.0240(9) 0.0048(7) 0.0057(7) 0.0019(7) 
C4 0.0274(10) 0.0375(10) 0.0291(9) 0.0119(8) 0.0025(8) 0.0036(8) 
C5 0.0231(9) 0.0355(10) 0.0370(10) 0.0122(8) 0.0029(8) 0.0077(8) 
C6 0.0215(9) 0.0293(9) 0.0318(9) 0.0030(7) 0.0062(7) 0.0045(7) 
C7 0.0195(8) 0.0201(8) 0.0231(8) 0.0004(6) 0.0038(6) -0.0011(6) 
C8 0.0188(8) 0.0202(7) 0.0216(8) -0.0024(6) 0.0079(6) -0.0015(6) 
C9 0.0219(9) 0.0244(8) 0.0291(9) -0.0007(7) 0.0071(7) 0.0035(7) 
C10 0.0223(9) 0.0293(9) 0.0323(9) -0.0040(7) 0.0132(7) 0.0031(7) 
C11 0.0269(9) 0.0280(9) 0.0246(9) -0.0032(7) 0.0126(7) -0.0012(7) 
C12 0.0216(8) 0.0192(8) 0.0226(8) -0.0022(6) 0.0072(6) -0.0019(6) 
C13 0.0200(8) 0.0197(7) 0.0204(8) -0.0029(6) 0.0064(6) -0.0015(6) 
C14 0.0295(9) 0.0237(8) 0.0189(8) -0.0027(6) 0.0061(7) -0.0060(7) 
C15 0.0393(11) 0.0346(10) 0.0222(9) -0.0040(7) 0.0103(8) -0.0028(8) 
C16 0.0513(13) 0.0476(12) 0.0198(9) -0.0027(8) 0.0125(9) -0.0046(10) 
C17 0.0533(13) 0.0460(12) 0.0184(9) 0.0057(8) 0.0038(9) -0.0040(10) 
C18 0.0398(11) 0.0359(10) 0.0225(9) 0.0022(8) 0.0002(8) -0.0006(9) 
C19 0.0296(9) 0.0261(8) 0.0177(8) -0.0024(6) 0.0039(7) -0.0052(7) 
C20 0.0209(8) 0.0192(7) 0.0212(8) -0.0022(6) 0.0051(6) -0.0015(6) 
C21 0.0208(8) 0.0220(8) 0.0170(7) 0.0031(6) 0.0074(6) 0.0046(6) 
C22 0.0225(8) 0.0240(8) 0.0218(8) 0.0029(6) 0.0064(7) 0.0022(7) 
C23 0.0241(9) 0.0345(10) 0.0337(10) 0.0009(8) 0.0113(8) 0.0007(8) 
C24 0.0310(10) 0.0406(11) 0.0350(10) -0.0040(8) 0.0201(8) 0.0055(8) 
C25 0.0358(10) 0.0316(9) 0.0273(9) -0.0073(7) 0.0141(8) 0.0024(8) 
C26 0.0243(9) 0.0259(8) 0.0187(8) 0.0012(6) 0.0059(6) 0.0024(7) 
C27 0.0246(9) 0.0320(9) 0.0308(9) -0.0053(8) 0.0079(7) -0.0031(7) 
C28 0.0468(13) 0.0297(10) 0.0597(15) -0.0062(10) 0.0046(11) -0.0011(9) 
C29 0.0344(12) 0.0556(14) 0.0445(13) -0.0161(11) -0.0005(10) -0.0041(10) 
C30 0.0286(9) 0.0302(9) 0.0299(9) -0.0084(7) 0.0096(8) -0.0021(8) 
C31 0.0514(13) 0.0285(10) 0.0460(12) -0.0063(9) 0.0203(10) -0.0050(9) 
C32 0.0447(13) 0.0542(14) 0.0404(12) -0.0103(10) -0.0067(10) -0.0070(11) 
C33 0.0236(8) 0.0238(8) 0.0172(7) 0.0016(6) 0.0020(6) 0.0020(7) 
C34 0.0246(9) 0.0245(8) 0.0236(8) 0.0011(7) 0.0040(7) 0.0014(7) 
C35 0.0318(10) 0.0263(9) 0.0322(10) -0.0019(7) 0.0056(8) 0.0052(8) 
C36 0.0312(10) 0.0406(11) 0.0317(10) 0.0002(8) 0.0067(8) 0.0114(9) 
C37 0.0203(9) 0.0480(12) 0.0335(10) 0.0005(9) 0.0011(8) 0.0010(8) 
C38 0.0245(9) 0.0338(10) 0.0229(8) -0.0007(7) -0.0010(7) -0.0021(7) 
C39 0.0258(9) 0.0224(8) 0.0435(11) -0.0055(8) 0.0059(8) -0.0022(7) 
C40 0.0369(12) 0.0452(12) 0.0437(12) -0.0047(10) -0.0045(10) -0.0105(10) 
C41 0.0447(13) 0.0488(13) 0.0493(13) -0.0020(11) 0.0122(11) -0.0206(11) 
C42 0.027(2) 0.042(2) 0.036(2) -0.012(2) -0.002(2) -0.010(2) 
C43 0.066(4) 0.039(2) 0.057(3) -0.0051(17) 0.008(2) -0.018(2) 
C44 0.067(4) 0.078(4) 0.086(5) -0.026(4) -0.033(3) -0.015(3) 
C42B 0.039(5) 0.045(5) 0.042(5) -0.008(5) 0.002(5) -0.011(5) 
C43B 0.073(7) 0.044(5) 0.068(6) -0.001(4) 0.008(6) -0.027(5) 
C44B 0.075(8) 0.078(7) 0.057(7) -0.017(5) -0.023(6) -0.025(6) 
C50 0.039(3) 0.074(5) 0.056(4) -0.019(4) 0.007(3) 0.007(3) 
Cl51 0.0523(16) 0.110(3) 0.0712(19) -0.0376(18) -0.0008(13) 0.0201(17) 
Cl52 0.0659(17) 0.083(3) 0.113(3) -0.0274(19) 0.0074(18) -0.0186(14) 
C50B 0.037(4) 0.058(4) 0.041(3) 0.004(3) 0.021(3) -0.009(3) 
Cl5B 0.060(2) 0.0629(18) 0.0474(16) -0.0087(13) 0.0184(16) 0.0014(14) 
Cl6B 0.0501(16) 0.119(4) 0.056(2) -0.027(2) 0.0149(11) -0.026(2) 
 
_geom_special_details 
; 
 All esds (except the esd in the dihedral angle between two l.s. planes) 
 are estimated using the full covariance matrix.  The cell esds are taken 
 into account individually in the estimation of esds in distances, angles 
 and torsion angles; correlations between esds in cell parameters are only 
 used when they are defined by crystal symmetry.  An approximate (isotropic) 
 treatment of cell esds is used for estimating esds involving l.s. planes. 
; 
 
loop_ 
 _geom_bond_atom_site_label_1 
 _geom_bond_atom_site_label_2 
 _geom_bond_distance 
 _geom_bond_site_symmetry_2 
 _geom_bond_publ_flag 
Ni1 C13 1.8504(16) . ? 
Ni1 C1 1.9188(17) . ? 
Ni1 C20 1.9201(17) . ? 
Ni1 Cl1 2.1879(5) . ? 
N1 C1 1.355(2) . ? 
N1 C2 1.396(2) . ? 
N1 C21 1.449(2) . ? 
N2 C1 1.375(2) . ? 
N2 C7 1.382(2) . ? 
N2 C8 1.422(2) . ? 
N3 C20 1.381(2) . ? 
N3 C14 1.387(2) . ? 
N3 C12 1.416(2) . ? 
N4 C20 1.352(2) . ? 
N4 C19 1.398(2) . ? 
N4 C33 1.439(2) . ? 
C2 C3 1.384(2) . ? 
C2 C7 1.395(2) . ? 
C3 C4 1.382(3) . ? 
C3 H3A 0.9500 . ? 
C4 C5 1.395(3) . ? 
C4 H4A 0.9500 . ? 
C5 C6 1.377(3) . ? 
C5 H5A 0.9500 . ? 
C6 C7 1.387(2) . ? 
C6 H6A 0.9500 . ? 
C8 C13 1.374(2) . ? 
C8 C9 1.381(2) . ? 
C9 C10 1.393(3) . ? 
C9 H9A 0.9500 . ? 
C10 C11 1.387(3) . ? 
C10 H10A 0.9500 . ? 
C11 C12 1.391(2) . ? 
C11 H11A 0.9500 . ? 
C12 C13 1.380(2) . ? 
C14 C19 1.393(3) . ? 
C14 C15 1.395(2) . ? 
C15 C16 1.384(3) . ? 
C15 H15A 0.9500 . ? 
C16 C17 1.391(3) . ? 
C16 H16A 0.9500 . ? 
C17 C18 1.380(3) . ? 
C17 H17A 0.9500 . ? 
C18 C19 1.385(3) . ? 
C18 H18A 0.9500 . ? 
C21 C26 1.391(2) . ? 
C21 C22 1.397(2) . ? 
C22 C23 1.389(2) . ? 
C22 C27 1.511(2) . ? 
C23 C24 1.383(3) . ? 
C23 H23A 0.9500 . ? 
C24 C25 1.372(3) . ? 
C24 H24A 0.9500 . ? 
C25 C26 1.394(2) . ? 
C25 H25A 0.9500 . ? 
C26 C30 1.512(3) . ? 
C27 C29 1.525(3) . ? 
C27 C28 1.525(3) . ? 
C27 H27A 1.0000 . ? 
C28 H28A 0.9800 . ? 
C28 H28B 0.9800 . ? 
C28 H28C 0.9800 . ? 
C29 H29A 0.9800 . ? 
C29 H29B 0.9800 . ? 
C29 H29C 0.9800 . ? 
C30 C32 1.528(3) . ? 
C30 C31 1.529(3) . ? 
C30 H30A 1.0000 . ? 
C31 H31A 0.9800 . ? 
C31 H31B 0.9800 . ? 
C31 H31C 0.9800 . ? 
C32 H32A 0.9800 . ? 
C32 H32B 0.9800 . ? 
C32 H32C 0.9800 . ? 
C33 C34 1.391(2) . ? 
C33 C38 1.395(2) . ? 
C34 C35 1.394(2) . ? 
C34 C39 1.512(3) . ? 
C35 C36 1.375(3) . ? 
C35 H35A 0.9500 . ? 
C36 C37 1.381(3) . ? 
C36 H36A 0.9500 . ? 
C37 C38 1.390(3) . ? 
C37 H37A 0.9500 . ? 
C38 C42B 1.511(8) . ? 
C38 C42 1.513(4) . ? 
C39 C40 1.519(3) . ? 
C39 C41 1.523(3) . ? 
C39 H39A 1.0000 . ? 
C40 H40A 0.9800 . ? 
C40 H40B 0.9800 . ? 
C40 H40C 0.9800 . ? 
C41 H41A 0.9800 . ? 
C41 H41B 0.9800 . ? 
C41 H41C 0.9800 . ? 
C42 C43 1.518(5) . ? 
C42 C44 1.519(5) . ? 
C42 H42A 1.0000 . ? 
C43 H43A 0.9800 . ? 
C43 H43B 0.9800 . ? 
C43 H43C 0.9800 . ? 
C44 H44A 0.9800 . ? 
C44 H44B 0.9800 . ? 
C44 H44C 0.9800 . ? 
C42B C43B 1.516(9) . ? 
C42B C44B 1.519(8) . ? 
C42B H42B 1.0000 . ? 
C43B H43D 0.9800 . ? 
C43B H43E 0.9800 . ? 
C43B H43F 0.9800 . ? 
C44B H44D 0.9800 . ? 
C44B H44E 0.9800 . ? 
C44B H44F 0.9800 . ? 
C50 Cl52 1.766(7) . ? 
C50 Cl51 1.780(6) . ? 
C50B Cl6B 1.765(7) . ? 
C50B Cl5B 1.780(6) . ? 
 
loop_ 
 _geom_angle_atom_site_label_1 
 _geom_angle_atom_site_label_2 
 _geom_angle_atom_site_label_3 
 _geom_angle 
 _geom_angle_site_symmetry_1 
 _geom_angle_site_symmetry_3 
 _geom_angle_publ_flag 
C13 Ni1 C1 80.63(7) . . ? 
C13 Ni1 C20 80.39(7) . . ? 
C1 Ni1 C20 160.97(7) . . ? 
C13 Ni1 Cl1 175.66(5) . . ? 
C1 Ni1 Cl1 98.24(5) . . ? 
C20 Ni1 Cl1 100.79(5) . . ? 
C1 N1 C2 110.67(13) . . ? 
C1 N1 C21 128.61(14) . . ? 
C2 N1 C21 120.65(13) . . ? 
C1 N2 C7 112.12(13) . . ? 
C1 N2 C8 114.21(13) . . ? 
C7 N2 C8 133.66(14) . . ? 
C20 N3 C14 111.73(14) . . ? 
C20 N3 C12 113.88(14) . . ? 
C14 N3 C12 134.30(14) . . ? 
C20 N4 C19 111.04(14) . . ? 
C20 N4 C33 126.57(14) . . ? 
C19 N4 C33 122.15(14) . . ? 
N1 C1 N2 104.99(14) . . ? 
N1 C1 Ni1 139.80(12) . . ? 
N2 C1 Ni1 115.17(11) . . ? 
C3 C2 C7 121.75(16) . . ? 
C3 C2 N1 131.11(16) . . ? 
C7 C2 N1 107.14(14) . . ? 
C4 C3 C2 116.83(17) . . ? 
C4 C3 H3A 121.6 . . ? 
C2 C3 H3A 121.6 . . ? 
C3 C4 C5 121.47(17) . . ? 
C3 C4 H4A 119.3 . . ? 
C5 C4 H4A 119.3 . . ? 
C6 C5 C4 121.75(17) . . ? 
C6 C5 H5A 119.1 . . ? 
C4 C5 H5A 119.1 . . ? 
C5 C6 C7 117.01(17) . . ? 
C5 C6 H6A 121.5 . . ? 
C7 C6 H6A 121.5 . . ? 
N2 C7 C6 133.77(16) . . ? 
N2 C7 C2 105.07(14) . . ? 
C6 C7 C2 121.17(16) . . ? 
C13 C8 C9 122.31(16) . . ? 
C13 C8 N2 109.25(14) . . ? 
C9 C8 N2 128.43(16) . . ? 
C8 C9 C10 117.44(16) . . ? 
C8 C9 H9A 121.3 . . ? 
C10 C9 H9A 121.3 . . ? 
C11 C10 C9 122.30(16) . . ? 
C11 C10 H10A 118.8 . . ? 
C9 C10 H10A 118.8 . . ? 
C10 C11 C12 117.54(16) . . ? 
C10 C11 H11A 121.2 . . ? 
C12 C11 H11A 121.2 . . ? 
C13 C12 C11 121.73(16) . . ? 
C13 C12 N3 109.38(14) . . ? 
C11 C12 N3 128.88(15) . . ? 
C8 C13 C12 118.67(15) . . ? 
C8 C13 Ni1 120.54(12) . . ? 
C12 C13 Ni1 120.71(13) . . ? 
N3 C14 C19 105.33(14) . . ? 
N3 C14 C15 133.65(18) . . ? 
C19 C14 C15 121.02(17) . . ? 
C16 C15 C14 116.57(19) . . ? 
C16 C15 H15A 121.7 . . ? 
C14 C15 H15A 121.7 . . ? 
C15 C16 C17 121.92(18) . . ? 
C15 C16 H16A 119.0 . . ? 
C17 C16 H16A 119.0 . . ? 
C18 C17 C16 121.75(19) . . ? 
C18 C17 H17A 119.1 . . ? 
C16 C17 H17A 119.1 . . ? 
C17 C18 C19 116.59(19) . . ? 
C17 C18 H18A 121.7 . . ? 
C19 C18 H18A 121.7 . . ? 
C18 C19 C14 122.14(17) . . ? 
C18 C19 N4 130.93(17) . . ? 
C14 C19 N4 106.93(15) . . ? 
N4 C20 N3 104.95(14) . . ? 
N4 C20 Ni1 139.51(12) . . ? 
N3 C20 Ni1 115.55(12) . . ? 
C26 C21 C22 123.21(15) . . ? 
C26 C21 N1 117.99(15) . . ? 
C22 C21 N1 118.68(15) . . ? 
C23 C22 C21 116.82(16) . . ? 
C23 C22 C27 120.69(16) . . ? 
C21 C22 C27 122.49(15) . . ? 
C24 C23 C22 121.25(18) . . ? 
C24 C23 H23A 119.4 . . ? 
C22 C23 H23A 119.4 . . ? 
C25 C24 C23 120.40(17) . . ? 
C25 C24 H24A 119.8 . . ? 
C23 C24 H24A 119.8 . . ? 
C24 C25 C26 120.84(17) . . ? 
C24 C25 H25A 119.6 . . ? 
C26 C25 H25A 119.6 . . ? 
C21 C26 C25 117.39(16) . . ? 
C21 C26 C30 122.73(15) . . ? 
C25 C26 C30 119.77(16) . . ? 
C22 C27 C29 112.89(16) . . ? 
C22 C27 C28 110.31(16) . . ? 
C29 C27 C28 110.58(18) . . ? 
C22 C27 H27A 107.6 . . ? 
C29 C27 H27A 107.6 . . ? 
C28 C27 H27A 107.6 . . ? 
C27 C28 H28A 109.5 . . ? 
C27 C28 H28B 109.5 . . ? 
H28A C28 H28B 109.5 . . ? 
C27 C28 H28C 109.5 . . ? 
H28A C28 H28C 109.5 . . ? 
H28B C28 H28C 109.5 . . ? 
C27 C29 H29A 109.5 . . ? 
C27 C29 H29B 109.5 . . ? 
H29A C29 H29B 109.5 . . ? 
C27 C29 H29C 109.5 . . ? 
H29A C29 H29C 109.5 . . ? 
H29B C29 H29C 109.5 . . ? 
C26 C30 C32 112.80(17) . . ? 
C26 C30 C31 109.34(17) . . ? 
C32 C30 C31 111.36(17) . . ? 
C26 C30 H30A 107.7 . . ? 
C32 C30 H30A 107.7 . . ? 
C31 C30 H30A 107.7 . . ? 
C30 C31 H31A 109.5 . . ? 
C30 C31 H31B 109.5 . . ? 
H31A C31 H31B 109.5 . . ? 
C30 C31 H31C 109.5 . . ? 
H31A C31 H31C 109.5 . . ? 
H31B C31 H31C 109.5 . . ? 
C30 C32 H32A 109.5 . . ? 
C30 C32 H32B 109.5 . . ? 
H32A C32 H32B 109.5 . . ? 
C30 C32 H32C 109.5 . . ? 
H32A C32 H32C 109.5 . . ? 
H32B C32 H32C 109.5 . . ? 
C34 C33 C38 123.52(16) . . ? 
C34 C33 N4 117.97(15) . . ? 
C38 C33 N4 118.48(15) . . ? 
C33 C34 C35 116.99(17) . . ? 
C33 C34 C39 122.14(16) . . ? 
C35 C34 C39 120.86(16) . . ? 
C36 C35 C34 121.04(18) . . ? 
C36 C35 H35A 119.5 . . ? 
C34 C35 H35A 119.5 . . ? 
C35 C36 C37 120.49(18) . . ? 
C35 C36 H36A 119.8 . . ? 
C37 C36 H36A 119.8 . . ? 
C36 C37 C38 120.98(18) . . ? 
C36 C37 H37A 119.5 . . ? 
C38 C37 H37A 119.5 . . ? 
C37 C38 C33 116.97(17) . . ? 
C37 C38 C42B 121.5(8) . . ? 
C33 C38 C42B 121.6(8) . . ? 
C37 C38 C42 121.8(3) . . ? 
C33 C38 C42 121.1(3) . . ? 
C34 C39 C40 112.35(17) . . ? 
C34 C39 C41 110.72(17) . . ? 
C40 C39 C41 111.55(17) . . ? 
C34 C39 H39A 107.3 . . ? 
C40 C39 H39A 107.3 . . ? 
C41 C39 H39A 107.3 . . ? 
C39 C40 H40A 109.5 . . ? 
C39 C40 H40B 109.5 . . ? 
H40A C40 H40B 109.5 . . ? 
C39 C40 H40C 109.5 . . ? 
H40A C40 H40C 109.5 . . ? 
H40B C40 H40C 109.5 . . ? 
C39 C41 H41A 109.5 . . ? 
C39 C41 H41B 109.5 . . ? 
H41A C41 H41B 109.5 . . ? 
C39 C41 H41C 109.5 . . ? 
H41A C41 H41C 109.5 . . ? 
H41B C41 H41C 109.5 . . ? 
C38 C42 C43 111.2(4) . . ? 
C38 C42 C44 113.3(6) . . ? 
C43 C42 C44 111.4(5) . . ? 
C38 C42 H42A 106.8 . . ? 
C43 C42 H42A 106.8 . . ? 
C44 C42 H42A 106.8 . . ? 
C42 C43 H43A 109.5 . . ? 
C42 C43 H43B 109.5 . . ? 
H43A C43 H43B 109.5 . . ? 
C42 C43 H43C 109.5 . . ? 
H43A C43 H43C 109.5 . . ? 
H43B C43 H43C 109.5 . . ? 
C42 C44 H44A 109.5 . . ? 
C42 C44 H44B 109.5 . . ? 
H44A C44 H44B 109.5 . . ? 
C42 C44 H44C 109.5 . . ? 
H44A C44 H44C 109.5 . . ? 
H44B C44 H44C 109.5 . . ? 
C38 C42B C43B 110.0(10) . . ? 
C38 C42B C44B 110.9(12) . . ? 
C43B C42B C44B 110.6(10) . . ? 
C38 C42B H42B 108.4 . . ? 
C43B C42B H42B 108.4 . . ? 
C44B C42B H42B 108.4 . . ? 
C42B C43B H43D 109.5 . . ? 
C42B C43B H43E 109.5 . . ? 
H43D C43B H43E 109.5 . . ? 
C42B C43B H43F 109.5 . . ? 
H43D C43B H43F 109.5 . . ? 
H43E C43B H43F 109.5 . . ? 
C42B C44B H44D 109.5 . . ? 
C42B C44B H44E 109.5 . . ? 
H44D C44B H44E 109.5 . . ? 
C42B C44B H44F 109.5 . . ? 
H44D C44B H44F 109.5 . . ? 
H44E C44B H44F 109.5 . . ? 
Cl52 C50 Cl51 104.7(6) . . ? 
Cl6B C50B Cl5B 113.9(6) . . ? 
 
_refine_diff_density_max    0.607 
_refine_diff_density_min   -0.474 
_refine_diff_density_rms    0.059 
 
_shelxl_version_number 2014-3 
 
_shelx_res_file 
; 
TITL cm48jsa in P2(1)/n 
CELL 0.71073 19.2462 8.9294 23.6297 90 96.786 90 
ZERR 4 0.0017 0.0008 0.0021 0 0.005 0 
LATT 1 
SYMM 0.5-X,0.5+Y,0.5-Z 
 
SFAC C H N Cl Ni 
UNIT 180 180 16 12 4 
ACTA 
L.S. 20 
PLAN  20 
SIZE 0.24 0.379 0.857 
TEMP -100 
BOND $H 
simu 0.01 0.02 c42 > c44b 
sadi 0.01 c38 c42 c38 c42b 
isor 0.01 c42 > c44b 
simu 0.01 0.02 c50 > cl6b 
isor 0.01 c50 > cl6b 
 
FMAP 2 
REM <HKL>C:\Structures\cm48j\cm48jsa.hkl</HKL> 
 
WGHT    0.035000    2.771400 
FVAR       0.08856   0.69665   0.54233 
NI1   5    0.672348    0.469055    0.010487    11.00000    0.01889    0.01933 = 
         0.01620   -0.00049    0.00578    0.00257 
CL1   4    0.752780    0.335677   -0.024206    11.00000    0.04132    0.04353 = 
         0.02626    0.00953    0.01672    0.02422 
N1    3    0.651353    0.590082   -0.112431    11.00000    0.01781    0.02076 = 
         0.01785    0.00139    0.00496    0.00313 
N2    3    0.578151    0.657691   -0.054353    11.00000    0.01857    0.02048 = 
         0.02011   -0.00038    0.00518    0.00269 
N3    3    0.637199    0.463371    0.122424    11.00000    0.02357    0.02284 = 
         0.01758   -0.00157    0.00767   -0.00074 
N4    3    0.724785    0.310607    0.123068    11.00000    0.02412    0.02267 = 
         0.01566   -0.00070    0.00288    0.00031 
C1    1    0.637410    0.573909   -0.057878    11.00000    0.01775    0.01800 = 
         0.02089   -0.00237    0.00542   -0.00040 
C2    1    0.600958    0.680232   -0.143182    11.00000    0.01950    0.02125 = 
         0.02284    0.00213    0.00450    0.00049 
C3    1    0.592960    0.724299   -0.199709    11.00000    0.02491    0.03099 = 
         0.02403    0.00483    0.00566    0.00194 
AFIX  43 
H3A   2    0.625143    0.694488   -0.225106    11.00000   -1.20000 
AFIX   0 
C4    1    0.535938    0.813733   -0.217474    11.00000    0.02742    0.03749 = 
         0.02908    0.01194    0.00251    0.00357 
AFIX  43 
H4A   2    0.528149    0.844480   -0.256192    11.00000   -1.20000 
AFIX   0 
C5    1    0.489567    0.859863   -0.179828    11.00000    0.02312    0.03546 = 
         0.03703    0.01217    0.00291    0.00766 
AFIX  43 
H5A   2    0.451369    0.922686   -0.193420    11.00000   -1.20000 
AFIX   0 
C6    1    0.497680    0.816759   -0.123472    11.00000    0.02146    0.02935 = 
         0.03179    0.00299    0.00619    0.00450 
AFIX  43 
H6A   2    0.466109    0.848821   -0.097918    11.00000   -1.20000 
AFIX   0 
C7    1    0.554025    0.724419   -0.105694    11.00000    0.01949    0.02008 = 
         0.02315    0.00045    0.00381   -0.00111 
C8    1    0.554915    0.658325    0.000577    11.00000    0.01884    0.02018 = 
         0.02159   -0.00244    0.00787   -0.00149 
C9    1    0.497865    0.731315    0.018051    11.00000    0.02188    0.02445 = 
         0.02907   -0.00065    0.00710    0.00352 
AFIX  43 
H9A   2    0.467534    0.790097   -0.007696    11.00000   -1.20000 
AFIX   0 
C10   1    0.486522    0.715418    0.074862    11.00000    0.02229    0.02927 = 
         0.03231   -0.00399    0.01324    0.00306 
AFIX  43 
H10A  2    0.447728    0.765091    0.087847    11.00000   -1.20000 
AFIX   0 
C11   1    0.529877    0.629606    0.113150    11.00000    0.02690    0.02803 = 
         0.02458   -0.00322    0.01258   -0.00115 
AFIX  43 
H11A  2    0.521339    0.619780    0.151760    11.00000   -1.20000 
AFIX   0 
C12   1    0.586313    0.558476    0.092931    11.00000    0.02164    0.01923 = 
         0.02264   -0.00222    0.00717   -0.00189 
C13   1    0.599324    0.572256    0.036974    11.00000    0.02003    0.01967 = 
         0.02036   -0.00293    0.00637   -0.00152 
C14   1    0.649242    0.410392    0.177874    11.00000    0.02953    0.02367 = 
         0.01894   -0.00268    0.00613   -0.00599 
C15   1    0.618017    0.437608    0.227236    11.00000    0.03928    0.03457 = 
         0.02222   -0.00395    0.01034   -0.00277 
AFIX  43 
H15A  2    0.580332    0.506158    0.227650    11.00000   -1.20000 
AFIX   0 
C16   1    0.644766    0.359600    0.275579    11.00000    0.05132    0.04758 = 
         0.01980   -0.00268    0.01253   -0.00460 
AFIX  43 
H16A  2    0.625012    0.375490    0.310078    11.00000   -1.20000 
AFIX   0 
C17   1    0.699734    0.258610    0.275112    11.00000    0.05329    0.04605 = 
         0.01837    0.00573    0.00382   -0.00397 
AFIX  43 
H17A  2    0.716088    0.206544    0.309155    11.00000   -1.20000 
AFIX   0 
C18   1    0.731139    0.232047    0.226510    11.00000    0.03979    0.03590 = 
         0.02247    0.00216    0.00016   -0.00060 
AFIX  43 
H18A  2    0.768769    0.163293    0.226253    11.00000   -1.20000 
AFIX   0 
C19   1    0.704984    0.310769    0.178116    11.00000    0.02964    0.02609 = 
         0.01765   -0.00241    0.00394   -0.00518 
C20   1    0.683657    0.403130    0.088378    11.00000    0.02087    0.01916 = 
         0.02119   -0.00222    0.00505   -0.00154 
C21   1    0.710379    0.533444   -0.138711    11.00000    0.02079    0.02195 = 
         0.01705    0.00305    0.00737    0.00461 
C22   1    0.775103    0.604446   -0.126679    11.00000    0.02246    0.02398 = 
         0.02180    0.00291    0.00638    0.00220 
C23   1    0.828626    0.555807   -0.156824    11.00000    0.02411    0.03451 = 
         0.03373    0.00085    0.01132    0.00067 
AFIX  43 
H23A  2    0.873641    0.600201   -0.149429    11.00000   -1.20000 
AFIX   0 
C24   1    0.817608    0.443968   -0.197397    11.00000    0.03096    0.04061 = 
         0.03501   -0.00399    0.02009    0.00549 
AFIX  43 
H24A  2    0.854423    0.415381   -0.218614    11.00000   -1.20000 
AFIX   0 
C25   1    0.753838    0.374075   -0.207187    11.00000    0.03583    0.03159 = 
         0.02726   -0.00727    0.01408    0.00244 
AFIX  43 
H25A  2    0.747260    0.295899   -0.234565    11.00000   -1.20000 
AFIX   0 
C26   1    0.698566    0.416320   -0.177467    11.00000    0.02431    0.02587 = 
         0.01873    0.00122    0.00586    0.00238 
C27   1    0.787382    0.729418   -0.083518    11.00000    0.02459    0.03201 = 
         0.03083   -0.00525    0.00790   -0.00312 
AFIX  13 
H27A  2    0.756796    0.710147   -0.052906    11.00000   -1.20000 
AFIX   0 
C28   1    0.765492    0.879286   -0.111016    11.00000    0.04682    0.02969 = 
         0.05973   -0.00618    0.00456   -0.00111 
AFIX  33 
H28A  2    0.773715    0.959247   -0.082607    11.00000   -1.50000 
H28B  2    0.793025    0.898823   -0.142566    11.00000   -1.50000 
H28C  2    0.715668    0.876092   -0.125546    11.00000   -1.50000 
AFIX   0 
C29   1    0.862790    0.736265   -0.055362    11.00000    0.03444    0.05560 = 
         0.04448   -0.01610   -0.00051   -0.00413 
AFIX  33 
H29A  2    0.867801    0.818909   -0.027893    11.00000   -1.50000 
H29B  2    0.874848    0.641693   -0.035554    11.00000   -1.50000 
H29C  2    0.894193    0.752596   -0.084541    11.00000   -1.50000 
AFIX   0 
C30   1    0.630690    0.329348   -0.185547    11.00000    0.02857    0.03020 = 
         0.02991   -0.00837    0.00959   -0.00214 
AFIX  13 
H30A  2    0.598427    0.374779   -0.160099    11.00000   -1.20000 
AFIX   0 
C31   1    0.644479    0.167377   -0.166410    11.00000    0.05143    0.02846 = 
         0.04601   -0.00632    0.02029   -0.00499 
AFIX  33 
H31A  2    0.600551    0.110817   -0.171612    11.00000   -1.50000 
H31B  2    0.678147    0.121732   -0.189265    11.00000   -1.50000 
H31C  2    0.663575    0.165780   -0.126086    11.00000   -1.50000 
AFIX   0 
C32   1    0.594497    0.336779   -0.246634    11.00000    0.04468    0.05422 = 
         0.04040   -0.01025   -0.00672   -0.00699 
AFIX  33 
H32A  2    0.550976    0.278843   -0.249524    11.00000   -1.50000 
H32B  2    0.583834    0.441325   -0.256873    11.00000   -1.50000 
H32C  2    0.625473    0.294936   -0.272676    11.00000   -1.50000 
AFIX   0 
C33   1    0.778166    0.212184    0.106719    11.00000    0.02358    0.02377 = 
         0.01717    0.00165    0.00202    0.00198 
C34   1    0.757430    0.074780    0.082681    11.00000    0.02465    0.02454 = 
         0.02363    0.00107    0.00399    0.00140 
C35   1    0.810196   -0.021214    0.069261    11.00000    0.03180    0.02626 = 
         0.03222   -0.00193    0.00561    0.00524 
AFIX  43 
H35A  2    0.798138   -0.116560    0.053165    11.00000   -1.20000 
AFIX   0 
C36   1    0.879452    0.019933    0.078955    11.00000    0.03117    0.04058 = 
         0.03173    0.00020    0.00673    0.01145 
AFIX  43 
H36A  2    0.914623   -0.046847    0.069288    11.00000   -1.20000 
AFIX   0 
C37   1    0.898244    0.157647    0.102645    11.00000    0.02031    0.04799 = 
         0.03349    0.00049    0.00107    0.00097 
AFIX  43 
H37A  2    0.946290    0.184536    0.109025    11.00000   -1.20000 
AFIX   0 
C38   1    0.847884    0.257469    0.117286    11.00000    0.02446    0.03384 = 
         0.02289   -0.00066   -0.00099   -0.00210 
C39   1    0.681319    0.029842    0.071303    11.00000    0.02576    0.02236 = 
         0.04351   -0.00549    0.00588   -0.00220 
AFIX  13 
H39A  2    0.652708    0.120930    0.076956    11.00000   -1.20000 
AFIX   0 
C40   1    0.661485   -0.022821    0.010402    11.00000    0.03695    0.04524 = 
         0.04365   -0.00468   -0.00454   -0.01045 
AFIX  33 
H40A  2    0.611891   -0.050667    0.005019    11.00000   -1.50000 
H40B  2    0.669749    0.058116   -0.016004    11.00000   -1.50000 
H40C  2    0.690022   -0.109883    0.002905    11.00000   -1.50000 
AFIX   0 
C41   1    0.663458   -0.087110    0.114222    11.00000    0.04467    0.04877 = 
         0.04928   -0.00197    0.01225   -0.02064 
AFIX  33 
H41A  2    0.613998   -0.114723    0.106147    11.00000   -1.50000 
H41B  2    0.692613   -0.176121    0.111318    11.00000   -1.50000 
H41C  2    0.672270   -0.045739    0.152817    11.00000   -1.50000 
AFIX   0 
 
Part 1 21 
C42   1    0.867086    0.411498    0.140788    21.00000    0.02741    0.04187 = 
         0.03557   -0.01170   -0.00172   -0.01029 
AFIX  13 
H42A  2    0.828771    0.443200    0.163313    21.00000   -1.20000 
AFIX   0 
C43   1    0.869012    0.525049    0.093213    21.00000    0.06640    0.03895 = 
         0.05740   -0.00507    0.00805   -0.01832 
AFIX  33 
H43A  2    0.881553    0.623580    0.109612    21.00000   -1.50000 
H43B  2    0.903881    0.494317    0.068465    21.00000   -1.50000 
H43C  2    0.822846    0.530578    0.070839    21.00000   -1.50000 
AFIX   0 
C44   1    0.934492    0.413524    0.181349    21.00000    0.06682    0.07765 = 
         0.08618   -0.02585   -0.03347   -0.01475 
AFIX  33 
H44A  2    0.944089    0.515878    0.195070    21.00000   -1.50000 
H44B  2    0.929647    0.347560    0.213796    21.00000   -1.50000 
H44C  2    0.973219    0.378442    0.161345    21.00000   -1.50000 
AFIX   0 
 
Part 2 -21 
same 0.01 c42 > c44 
C42B  1    0.867719    0.409305    0.142409   -21.00000    0.03917    0.04502 = 
         0.04219   -0.00842    0.00224   -0.01093 
AFIX  13 
H42B  2    0.823858    0.463853    0.148561   -21.00000   -1.20000 
AFIX   0 
C43B  1    0.905790    0.499227    0.101227   -21.00000    0.07286    0.04381 = 
         0.06786   -0.00127    0.00826   -0.02676 
AFIX  33 
H43D  2    0.918457    0.597468    0.117837   -21.00000   -1.50000 
H43E  2    0.948290    0.445831    0.093856   -21.00000   -1.50000 
H43F  2    0.875241    0.512528    0.065358   -21.00000   -1.50000 
AFIX   0 
C44B  1    0.912513    0.393702    0.199505   -21.00000    0.07516    0.07776 = 
         0.05696   -0.01679   -0.02282   -0.02472 
AFIX  33 
H44D  2    0.924714    0.493384    0.214953   -21.00000   -1.50000 
H44E  2    0.886342    0.338965    0.226041   -21.00000   -1.50000 
H44F  2    0.955377    0.338693    0.194353   -21.00000   -1.50000 
AFIX   0 
Part 0 
 
Part 1 31 
C50   1    1.099591    0.795217    0.069633    31.00000    0.03915    0.07353 = 
         0.05634   -0.01852    0.00718    0.00698 
 
CL51  4    1.064193    0.865135    0.130708    31.00000    0.05226    0.10982 = 
         0.07125   -0.03761   -0.00082    0.02009 
CL52  4    1.034891    0.672358    0.037046    31.00000    0.06592    0.08345 = 
         0.11276   -0.02735    0.00742   -0.01856 
Part 2 -31 
same 0.01 c50 > cl52 
C50B  1    1.099847    0.778894    0.075912   -31.00000    0.03750    0.05772 = 
         0.04063    0.00362    0.02137   -0.00944 
 
CL5B  4    1.074640    0.877270    0.135773   -31.00000    0.06036    0.06287 = 
         0.04739   -0.00868    0.01842    0.00143 
CL6B  4    1.028655    0.712128    0.028689   -31.00000    0.05008    0.11904 = 
         0.05565   -0.02674    0.01485   -0.02599 
Part 0 
HKLF 4 
 
REM  cm48jsa in P2(1)/n 
REM R1 =  0.0370 for    8172 Fo > 4sig(Fo)  and  0.0513 for all   10140 data 
REM    534 parameters refined using    211 restraints 
 
END 
 
WGHT      0.0357      2.8447 
 
REM Highest difference peak  0.607,  deepest hole -0.474,  1-sigma level  0.059 
Q1    1   1.1404  0.7201  0.0881  11.00000  0.05    0.61 
Q2    1   0.7782  0.4032 -0.0079  11.00000  0.05    0.52 
Q3    1   1.1174  0.8688  0.0469  11.00000  0.05    0.45 
Q4    1   0.5773  0.6970 -0.1250  11.00000  0.05    0.31 
Q5    1   1.1010  0.8079  0.0873  11.00000  0.05    0.31 
Q6    1   0.8608  0.3260  0.1310  11.00000  0.05    0.28 
Q7    1   0.7213  0.0523  0.0761  11.00000  0.05    0.28 
Q8    1   0.6619  0.3609 -0.1848  11.00000  0.05    0.27 
Q9    1   0.6817  0.3456  0.2732  11.00000  0.05    0.27 
Q10   1   0.7261  0.4026 -0.1924  11.00000  0.05    0.26 
Q11   1   0.7817  0.6603 -0.1054  11.00000  0.05    0.26 
Q12   1   0.6400  0.4109  0.2516  11.00000  0.05    0.26 
Q13   1   0.7638  0.1417  0.0930  11.00000  0.05    0.25 
Q14   1   0.6205  0.6358 -0.1332  11.00000  0.05    0.25 
Q15   1   0.6761  0.5980  0.0098  11.00000  0.05    0.25 
Q16   1   0.6393  0.2553 -0.1781  11.00000  0.05    0.25 
Q17   1   0.7784  0.0428  0.0717  11.00000  0.05    0.24 
Q18   1   0.6759  0.3568  0.1819  11.00000  0.05    0.24 
Q19   1   0.7210  0.3187  0.1532  11.00000  0.05    0.24 
Q20   1   0.9626  0.4295  0.1512  11.00000  0.05    0.24 
; 
_shelx_res_checksum   27025 
 
_shelx_hkl_file 
; 
  -1   0   0    0.03    0.04 
   1   0   0   -0.33    0.02 
   1   0   0   -0.32    0.01 
  -1   0   0   -0.07    0.03 
  -1   0   0   -0.26    0.02 
  -2   0   0  221.82   21.69 
  -2   0   0  213.19   20.25 
  -2   0   0  219.27   20.40 
   2   0   0  230.09   21.69 
   2   0   0  237.85   21.62 
  -2   0   0  212.92   21.62 
  -2   0   0  208.95   24.21 
   2   0   0  218.96   20.25 
   2   0   0  195.18   20.40 
  -3   0   0    0.01    0.07 
   3   0   0    0.02    0.06 
   3   0   0   -0.08    0.11 
   3   0   0    0.03    0.02 
   3   0   0   -0.10    0.05 
  -3   0   0   -0.12    0.05 
  -3   0   0    0.01    0.06 
   3   0   0    0.06    0.06 
   3   0   0   -0.03    0.05 
   3   0   0    0.04    0.07 
  -3   0   0   -0.03    0.05 
  -3   0   0   -0.18    0.07 
  -3   0   0   -0.02    0.02 
  -3   0   0   -0.02    0.02 
   3   0   0    0.11    0.06 
   3   0   0   -0.04    0.06 
  -3   0   0    0.02    0.05 
  -4   0   0   59.89    6.56 
  -4   0   0   64.39    5.56 
  -4   0   0   61.10    5.50 
   4   0   0   61.33    5.55 
   4   0   0   56.28    5.88 
   4   0   0   55.86    5.91 
   4   0   0   49.37    6.21 
  -4   0   0   57.09    5.87 
  -4   0   0   60.35    5.34 
   4   0   0   58.73    5.49 
  -4   0   0   61.11    6.07 
  -5   0   0   -0.06    0.04 
   5   0   0    0.28    0.11 
  -5   0   0    0.06    0.13 
   5   0   0   -0.06    0.08 
   5   0   0    0.18    0.16 
   5   0   0    0.04    0.08 
  -5   0   0   -0.04    0.07 
   5   0   0   -0.06    0.10 
   5   0   0   -0.01    0.09 
   5   0   0   -0.05    0.11 
  -5   0   0   -0.05    0.03 
  -5   0   0   -0.05    0.09 
  -5   0   0    0.15    0.11 
  -5   0   0   -0.04    0.07 
  -6   0   0   15.98    1.54 
   6   0   0   14.48    1.55 
   6   0   0   16.52    1.46 
   6   0   0   13.46    1.63 
  -6   0   0   15.21    1.46 
  -6   0   0   14.66    1.72 
   6   0   0   14.39    1.64 
  -6   0   0   13.14    1.36 
   6   0   0   18.10    1.60 
   6   0   0   15.91    1.49 
  -6   0   0   13.20    1.60 
   7   0   0   -0.08    0.10 
   7   0   0    0.05    0.11 
   7   0   0    0.05    0.22 
  -7   0   0    0.00    0.06 
   7   0   0    0.35    0.18 
  -7   0   0   -0.06    0.08 
  -7   0   0   -0.08    0.10 
   7   0   0    0.05    0.14 
  -7   0   0    0.05    0.09 
  -7   0   0    0.07    0.04 
  -7   0   0   -0.02    0.11 
  -8   0   0    3.13    0.44 
  -8   0   0    2.37    0.36 
  -8   0   0    2.25    0.41 
  -8   0   0    2.54    0.38 
   8   0   0    2.44    0.53 
   8   0   0    2.63    0.42 
   8   0   0    2.58    0.37 
   8   0   0    2.08    0.39 
  -8   0   0    3.03    0.27 
   8   0   0    2.97    0.45 
  -9   0   0   -0.08    0.11 
   9   0   0    0.28    0.18 
  -9   0   0   -0.16    0.08 
  -9   0   0    0.01    0.04 
  -9   0   0    0.00    0.08 
  -9   0   0   -0.10    0.12 
   9   0   0    0.06    0.13 
   9   0   0    0.21    0.17 
   9   0   0    0.14    0.14 
   9   0   0   -0.18    0.27 
  -9   0   0   -0.03    0.11 
 -10   0   0   17.05    1.74 
  10   0   0   16.10    1.95 
  10   0   0   14.78    1.87 
  10   0   0   17.54    1.74 
  10   0   0   15.04    1.65 
 -10   0   0   16.71    1.96 
 -10   0   0   18.64    1.86 
 -10   0   0   17.50    1.69 
  11   0   0    0.00    0.19 
  11   0   0   -0.05    0.15 
 -11   0   0    0.06    0.15 
 -11   0   0    0.05    0.18 
  11   0   0   -0.47    0.27 
 -11   0   0    0.06    0.12 
 -11   0   0    0.16    0.13 
  11   0   0   -0.38    0.11 
 -11   0   0    0.28    0.16 
 -11   0   0    0.25    0.18 
  11   0   0    0.02    0.22 
 -12   0   0   52.65    5.31 
 -12   0   0   48.34    5.58 
 -12   0   0   46.32    5.18 
 -12   0   0   48.43    4.97 
  12   0   0   46.01    5.11 
  12   0   0   49.13    4.78 
  12   0   0   47.62    5.21 
 -12   0   0   54.16    4.98 
 -12   0   0   51.67    4.72 
  12   0   0   48.81    4.68 
  12   0   0   45.26    5.30 
  13   0   0    0.23    0.20 
 -13   0   0    0.37    0.16 
  13   0   0    0.19    0.17 
 -13   0   0    0.14    0.16 
 -13   0   0    0.31    0.20 
 -13   0   0    0.06    0.19 
  13   0   0    0.27    0.23 
 -13   0   0    0.10    0.17 
 -13   0   0    0.31    0.20 
 -13   0   0    0.27    0.21 
  13   0   0   -0.02    0.35 
  13   0   0    0.45    0.28 
 -14   0   0   12.95    1.42 
  14   0   0   11.15    1.46 
 -14   0   0   11.05    1.26 
 -14   0   0   10.87    1.31 
  14   0   0   10.99    1.26 
  14   0   0    9.78    1.16 
  14   0   0    6.58    1.47 
 -14   0   0   10.79    1.22 
 -14   0   0   10.66    1.20 
 -14   0   0   12.52    1.33 
  14   0   0   11.21    1.36 
  15   0   0    0.31    0.20 
  15   0   0    0.71    0.52 
  15   0   0    0.02    0.25 
 -15   0   0   -0.12    0.18 
 -15   0   0   -0.06    0.20 
 -15   0   0    0.19    0.17 
 -15   0   0   -0.21    0.17 
  15   0   0    0.24    0.33 
 -15   0   0   -0.27    0.20 
 -15   0   0    0.07    0.20 
 -16   0   0   -0.12    0.20 
 -16   0   0    0.09    0.22 
 -16   0   0    0.28    0.25 
 -16   0   0    0.05    0.23 
  16   0   0    0.40    0.47 
  16   0   0    0.93    0.39 
  16   0   0    0.15    0.20 
  16   0   0   -0.06    0.26 
 -16   0   0    0.38    0.25 
 -16   0   0   -0.15    0.15 
  17   0   0    0.33    0.35 
 -17   0   0   -0.13    0.24 
 -17   0   0   -0.02    0.26 
 -17   0   0    0.05    0.20 
  17   0   0   -0.23    0.17 
 -17   0   0    0.04    0.23 
  17   0   0    0.17    0.62 
  17   0   0    0.03    0.32 
 -17   0   0   -0.15    0.17 
 -18   0   0   -0.12    0.24 
 -18   0   0    0.03    0.25 
 -18   0   0    0.40    0.33 
 -18   0   0    0.06    0.30 
  18   0   0    0.48    0.27 
  18   0   0   -0.71    0.28 
  18   0   0   -0.10    0.50 
  18   0   0    0.76    0.38 
  19   0   0    0.32    0.44 
  19   0   0    0.14    0.59 
 -19   0   0    0.22    0.33 
 -19   0   0    0.10    0.26 
 -19   0   0   -0.15    0.21 
  19   0   0   -0.08    0.30 
  19   0   0    0.02    0.25 
 -20   0   0    0.73    0.35 
  20   0   0    1.89    0.84 
 -20   0   0    0.72    0.34 
  20   0   0    1.37    0.53 
  20   0   0    0.66    0.44 
  21   0   0    0.15    0.72 
 -21   0   0   -0.02    0.25 
  21   0   0    0.33    0.41 
 -21   0   0   -0.37    0.28 
  21   0   0    0.39    0.51 
 -22   0   0    5.44    0.90 
  22   0   0    4.48    1.11 
  22   0   0    5.91    0.95 
  22   0   0    2.54    1.13 
 -22   0   0    5.30    0.86 
  23   0   0    0.24    0.70 
 -23   0   0   -0.07    0.33 
  23   0   0   -1.22    0.46 
  23   0   0    0.25    0.41 
 -23   0   0   -0.09    0.33 
 -24   0   0    0.94    0.43 
  24   0   0    0.88    0.76 
  24   0   0    1.56    1.11 
  25   0   0    0.82    0.71 
  25   0   0    0.80    0.93 
 -25   0   0    0.11    0.35 
   0  -1   0    0.00    0.03 
   0  -1   0   -0.02    0.03 
   0  -1   0    0.00    0.06 
   0  -1   0   -0.04    0.03 
   0  -1   0    0.06    0.05 
   0  -1   0    0.12    0.06 
   0  -1   0    0.12    0.06 
   0  -1   0   -0.02    0.04 
   0   1   0    0.00    0.04 
   0   1   0   -0.06    0.04 
   0   1   0    0.03    0.06 
   0   1   0    0.00    0.05 
   0   1   0    0.08    0.04 
   0   1   0   -0.02    0.04 
   0   1   0    0.00    0.04 
   1  -1   0  186.84   16.92 
   1  -1   0  194.51   18.45 
  -1  -1   0  159.53   20.68 
   1  -1   0  163.25   17.41 
  -1  -1   0  199.74   17.44 
   1  -1   0  197.36   17.29 
   1  -1   0  175.88   19.59 
   1  -1   0  186.69   18.72 
  -1  -1   0  188.30   17.32 
  -1  -1   0  211.57   16.93 
  -1  -1   0  182.24   19.40 
  -1  -1   0  178.44   19.59 
  -1  -1   0  208.33   19.13 
  -1   1   0  164.53   20.68 
  -1   1   0  195.88   16.92 
  -1   1   0  170.53   19.39 
  -1   1   0  174.30   18.72 
   1   1   0  162.72   19.40 
  -1   1   0  187.15   18.45 
  -1   1   0  191.95   19.59 
   1   1   0  196.23   19.13 
   1   1   0  204.91   16.92 
   1   1   0  200.33   17.32 
   1   1   0  175.25   17.44 
   2  -1   0   27.73    3.42 
   2  -1   0   35.11    2.88 
   2  -1   0   36.29    3.24 
  -2  -1   0   31.57    3.27 
   2  -1   0   27.89    3.08 
  -2  -1   0   36.12    3.09 
  -2  -1   0   27.35    3.23 
  -2  -1   0   25.13    2.81 
   2  -1   0   29.74    2.80 
   2  -1   0   29.54    3.25 
  -2  -1   0   29.64    2.92 
   2  -1   0   30.14    3.08 
  -2  -1   0   26.25    3.20 
   2  -1   0   27.95    3.13 
  -2  -1   0   27.07    2.89 
   2   1   0   28.34    2.89 
  -2   1   0   32.50    3.08 
   2   1   0   33.54    3.25 
   2   1   0   27.26    2.92 
  -2   1   0   33.44    3.25 
  -2   1   0   29.15    2.80 
  -2   1   0   29.96    3.08 
   2   1   0   29.11    3.20 
  -2   1   0   33.30    3.14 
   2   1   0   30.17    3.44 
   2   1   0   28.52    2.81 
  -3  -1   0  197.74   21.30 
  -3  -1   0  201.59   18.83 
  -3  -1   0  194.76   23.03 
   3  -1   0  208.16   20.58 
  -3  -1   0  207.81   21.59 
   3  -1   0  208.97   18.82 
   3  -1   0  220.31   20.64 
   3  -1   0  197.47   20.85 
  -3  -1   0  210.82   19.29 
  -3  -1   0  231.47   20.63 
  -3  -1   0  199.62   20.57 
   3  -1   0  215.35   19.39 
  -3  -1   0  229.00   21.83 
   3  -1   0  233.55   21.80 
  -3  -1   0  210.24   19.43 
   3   1   0  180.46   20.57 
   3   1   0  195.48   19.43 
  -3   1   0  190.36   19.38 
   3   1   0  210.25   19.29 
  -3   1   0  210.67   20.84 
  -3   1   0  184.07   20.63 
  -3   1   0  202.44   21.80 
  -3   1   0  195.07   20.57 
   3   1   0  201.91   18.83 
   3   1   0  172.82   21.81 
   3   1   0  237.05   21.32 
  -3   1   0  220.09   18.82 
  -3   1   0  188.85   23.02 
   3   1   0  234.46   23.04 
  -4  -1   0  705.49   64.76 
   4  -1   0  617.55   61.67 
  -4  -1   0  557.32   56.49 
  -4  -1   0  672.14   65.44 
   4  -1   0  692.11   65.42 
  -4  -1   0  594.26   63.86 
   4  -1   0  669.55   62.50 
   4  -1   0  586.16   57.77 
   4  -1   0  608.55   58.18 
   4  -1   0  627.99   61.91 
  -4  -1   0  585.00   57.81 
  -4  -1   0  597.95   69.09 
  -4  -1   0  644.01   61.90 
   4  -1   0  545.58   69.08 
   4  -1   0  602.70   56.48 
   4   1   0  609.54   57.81 
   4   1   0  651.03   61.67 
  -4   1   0  522.57   65.41 
  -4   1   0  610.82   61.90 
   4   1   0  616.59   69.10 
   4   1   0  591.06   56.49 
   4   1   0  651.96   65.44 
  -4   1   0  702.77   69.09 
  -4   1   0  630.45   58.19 
   4   1   0  637.90   58.24 
  -5  -1   0   26.68    2.69 
   5  -1   0   24.57    2.60 
   5  -1   0   25.27    2.34 
   5  -1   0   22.86    2.80 
   5  -1   0   25.79    2.38 
  -5  -1   0   24.61    2.82 
  -5  -1   0   26.08    2.30 
  -5  -1   0   24.80    2.39 
  -5  -1   0   22.85    2.65 
   5  -1   0   25.80    2.27 
   5  -1   0   25.91    2.67 
   5  -1   0   27.36    2.61 
   5   1   0   26.38    2.44 
  -5   1   0   24.59    2.52 
  -5   1   0   22.55    2.66 
  -5   1   0   25.04    2.38 
   5   1   0   21.47    2.28 
  -5   1   0   27.40    2.34 
   5   1   0   21.47    2.58 
   5   1   0   25.06    2.39 
  -6  -1   0    6.18    0.60 
   6  -1   0    5.60    0.53 
   6  -1   0    4.74    0.56 
   6  -1   0    5.04    0.48 
  -6  -1   0    4.44    0.63 
  -6  -1   0    4.51    0.61 
  -6  -1   0    4.88    0.63 
  -6  -1   0    5.03    0.52 
   6  -1   0    5.40    0.65 
   6  -1   0    4.35    0.61 
   6  -1   0    5.08    0.69 
   6  -1   0    5.15    0.75 
  -6  -1   0    7.53    0.69 
  -6  -1   0    4.74    0.68 
  -6   1   0    4.87    0.64 
  -6   1   0    5.30    0.54 
   6   1   0    3.46    0.57 
   6   1   0    4.53    0.72 
   6   1   0    5.47    0.59 
   6   1   0    4.99    0.51 
  -6   1   0    5.02    0.58 
  -6   1   0    5.83    0.58 
   6   1   0    5.26    0.66 
   6   1   0    7.03    0.67 
  -6   1   0    6.27    0.63 
   7  -1   0   18.27    2.09 
  -7  -1   0   16.14    2.20 
  -7  -1   0   19.02    2.11 
  -7  -1   0   19.69    1.89 
   7  -1   0   18.26    2.08 
  -7  -1   0   18.72    1.97 
   7  -1   0   14.74    2.18 
   7  -1   0   18.71    2.06 
   7  -1   0   19.75    1.83 
  -7  -1   0   22.77    2.10 
   7  -1   0   18.33    1.87 
  -7  -1   0   18.96    1.78 
   7   1   0   20.69    1.98 
   7   1   0   16.09    1.77 
  -7   1   0   20.33    1.84 
   7   1   0   21.34    2.13 
  -7   1   0   23.36    2.21 
   7   1   0   16.51    1.91 
  -7   1   0   23.22    2.10 
  -7   1   0   19.59    1.97 
   7   1   0   18.78    2.09 
   8  -1   0    2.96    0.40 
  -8  -1   0    2.60    0.40 
  -8  -1   0    2.25    0.39 
   8  -1   0    3.48    0.41 
   8  -1   0    2.72    0.45 
  -8  -1   0    2.51    0.35 
   8  -1   0    1.87    0.47 
   8  -1   0    2.04    0.35 
  -8  -1   0    2.62    0.43 
  -8  -1   0    2.51    0.30 
   8  -1   0    2.35    0.31 
  -8  -1   0    2.16    0.39 
   8   1   0    2.40    0.42 
  -8   1   0    1.70    0.36 
  -8   1   0    2.60    0.35 
  -8   1   0    2.19    0.32 
   8   1   0    1.91    0.38 
   8   1   0    2.22    0.36 
   8   1   0    2.33    0.51 
  -8   1   0    2.99    0.40 
  -9  -1   0    0.88    0.20 
  -9  -1   0    0.59    0.23 
   9  -1   0    0.65    0.35 
  -9  -1   0    1.17    0.18 
   9  -1   0    1.18    0.31 
   9  -1   0    1.01    0.19 
  -9  -1   0    1.98    0.38 
  -9  -1   0    0.37    0.19 
   9  -1   0    0.69    0.22 
  -9  -1   0    0.92    0.27 
   9  -1   0    0.89    0.23 
  -9   1   0    1.22    0.24 
   9   1   0    0.82    0.24 
   9   1   0    1.07    0.24 
   9   1   0    1.59    0.45 
  -9   1   0    1.18    0.22 
  -9   1   0    1.17    0.23 
   9   1   0    0.43    0.24 
  -9   1   0    0.88    0.23 
   9   1   0    1.22    0.29 
 -10  -1   0   15.20    1.49 
 -10  -1   0   15.06    1.63 
 -10  -1   0   14.88    1.76 
  10  -1   0   16.06    1.87 
  10  -1   0   16.19    1.62 
  10  -1   0   16.73    1.55 
 -10  -1   0   16.50    1.66 
  10  -1   0   13.86    1.76 
 -10  -1   0   15.35    1.87 
  10   1   0   13.15    1.91 
 -10   1   0   17.71    1.79 
 -10   1   0   15.01    1.56 
 -10   1   0   19.69    1.72 
 -10   1   0   15.13    1.66 
  10   1   0   15.66    1.81 
 -10   1   0   17.16    1.87 
  10   1   0   13.97    1.59 
  10   1   0   13.42    1.64 
  11  -1   0   11.15    1.38 
 -11  -1   0   12.98    1.26 
 -11  -1   0   10.66    1.26 
 -11  -1   0   10.70    1.42 
 -11  -1   0   10.86    1.37 
  11  -1   0    8.41    1.32 
  11  -1   0   10.51    1.24 
  11  -1   0   12.70    1.18 
  11  -1   0   10.80    1.57 
 -11  -1   0   13.02    1.37 
 -11  -1   0   12.28    1.14 
  11   1   0   10.09    1.31 
  11   1   0   12.07    1.39 
 -11   1   0   12.45    1.20 
 -11   1   0   13.61    1.37 
  11   1   0   12.77    1.24 
 -11   1   0   10.98    1.26 
  11   1   0   11.86    1.30 
 -11   1   0   13.07    1.31 
  11   1   0   10.59    1.55 
 -11   1   0   11.54    1.41 
 -12  -1   0    0.15    0.19 
  12  -1   0    0.17    0.14 
  12  -1   0    0.04    0.24 
 -12  -1   0    0.18    0.12 
 -12  -1   0    0.02    0.13 
  12  -1   0   -0.20    0.27 
 -12  -1   0    0.29    0.18 
 -12  -1   0    0.01    0.16 
 -12  -1   0    0.17    0.22 
 -12  -1   0    0.08    0.15 
  12  -1   0    0.01    0.17 
  12  -1   0    0.07    0.15 
  12   1   0    0.06    0.19 
 -12   1   0    0.15    0.16 
  12   1   0    0.07    0.23 
 -12   1   0   -0.02    0.14 
  12   1   0    0.11    0.18 
 -12   1   0   -0.07    0.12 
 -12   1   0   -0.07    0.18 
 -12   1   0   -0.06    0.17 
  12   1   0    0.22    0.39 
 -12   1   0    0.13    0.16 
  12   1   0    0.20    0.23 
  13  -1   0    0.70    0.25 
  13  -1   0    0.69    0.20 
 -13  -1   0    0.25    0.21 
 -13  -1   0    0.62    0.27 
 -13  -1   0    0.50    0.23 
 -13  -1   0    0.30    0.21 
  13  -1   0    0.47    0.24 
 -13  -1   0    0.92    0.24 
 -13  -1   0    0.42    0.16 
  13  -1   0    0.86    0.48 
 -13  -1   0    0.36    0.18 
  13  -1   0    0.76    0.34 
 -13   1   0    0.45    0.24 
 -13   1   0    0.61    0.24 
  13   1   0    0.42    0.29 
  13   1   0    0.81    0.26 
 -13   1   0    0.45    0.20 
 -13   1   0    1.00    0.30 
  13   1   0   -0.01    0.40 
 -13   1   0    0.93    0.25 
  13   1   0    0.79    0.32 
 -13   1   0    0.22    0.18 
  13   1   0    0.58    0.28 
  14  -1   0    1.01    0.34 
 -14  -1   0    1.35    0.39 
 -14  -1   0    1.41    0.41 
 -14  -1   0    1.75    0.44 
  14  -1   0    1.44    0.28 
  14  -1   0    1.88    0.42 
 -14  -1   0    1.37    0.28 
 -14  -1   0    1.54    0.34 
  14  -1   0    0.89    0.55 
 -14  -1   0    1.77    0.42 
  14  -1   0    0.23    0.37 
  14   1   0    0.81    0.35 
  14   1   0    1.88    0.62 
 -14   1   0    0.96    0.27 
 -14   1   0    1.53    0.38 
 -14   1   0    1.99    0.34 
 -14   1   0    1.46    0.37 
  14   1   0    1.35    0.43 
  14   1   0    1.12    0.32 
 -14   1   0    1.57    0.37 
  15  -1   0    0.28    0.27 
  15  -1   0    1.09    0.58 
  15  -1   0    0.17    0.34 
 -15  -1   0    0.42    0.26 
 -15  -1   0    0.47    0.20 
 -15  -1   0    0.41    0.26 
  15  -1   0    0.19    0.17 
 -15  -1   0    0.44    0.25 
 -15   1   0    0.58    0.24 
 -15   1   0    0.16    0.24 
  15   1   0    0.22    0.27 
  15   1   0    0.65    0.27 
 -15   1   0    0.44    0.21 
  15   1   0    0.46    0.33 
 -15   1   0    0.29    0.24 
  15   1   0    0.30    0.47 
 -15   1   0    0.35    0.25 
 -16  -1   0    3.43    0.61 
 -16  -1   0    4.10    0.68 
 -16  -1   0    3.38    0.50 
  16  -1   0    3.72    0.63 
  16  -1   0    3.06    0.69 
 -16  -1   0    3.53    0.56 
 -16  -1   0    4.48    0.71 
  16  -1   0    2.55    0.47 
  16  -1   0    1.43    0.74 
 -16   1   0    2.71    0.58 
  16   1   0    3.30    0.56 
 -16   1   0    4.06    0.68 
 -16   1   0    3.93    0.66 
 -16   1   0    4.14    0.54 
  16   1   0    4.27    0.96 
  16   1   0    5.06    0.78 
  16   1   0    3.52    0.66 
 -17  -1   0    0.22    0.28 
  17  -1   0    0.15    0.27 
 -17  -1   0    0.84    0.36 
  17  -1   0    1.32    0.67 
  17  -1   0    0.51    0.23 
 -17  -1   0    0.94    0.38 
  17  -1   0    0.69    0.45 
 -17  -1   0    0.19    0.25 
 -17   1   0    0.55    0.26 
  17   1   0    0.73    0.29 
  17   1   0    0.38    0.38 
 -17   1   0    0.70    0.33 
  17   1   0    1.55    0.48 
 -17   1   0    0.51    0.32 
  17   1   0    0.19    0.48 
 -17   1   0    0.92    0.36 
  18  -1   0    5.96    1.10 
 -18  -1   0    6.95    0.99 
  18  -1   0    5.86    1.25 
 -18  -1   0    4.52    0.93 
  18  -1   0    5.49    0.89 
 -18  -1   0    6.13    0.92 
 -18  -1   0    6.62    0.87 
  18   1   0    5.37    1.24 
 -18   1   0    5.58    0.89 
  18   1   0    5.95    1.04 
 -18   1   0    6.60    0.98 
  18   1   0    5.62    0.95 
 -18   1   0    6.52    0.82 
  18   1   0    7.64    0.89 
  19  -1   0   -0.10    0.27 
 -19  -1   0    0.01    0.27 
  19  -1   0   -0.06    0.44 
 -19  -1   0   -0.58    0.27 
 -19  -1   0    0.22    0.28 
 -19  -1   0    0.08    0.23 
  19  -1   0    0.58    0.65 
  19   1   0   -0.20    0.23 
 -19   1   0    0.30    0.23 
  19   1   0    0.57    0.58 
  19   1   0    0.31    0.39 
 -19   1   0    0.39    0.29 
  19   1   0    0.00    0.39 
  20  -1   0    0.79    0.74 
 -20  -1   0    0.66    0.37 
 -20  -1   0    1.35    0.50 
  20  -1   0    0.73    0.59 
 -20  -1   0    0.79    0.32 
  20  -1   0    1.43    0.44 
  20   1   0    1.18    0.40 
 -20   1   0    1.64    0.44 
  20   1   0    0.70    0.51 
  20   1   0    0.95    0.72 
 -20   1   0    1.81    0.46 
  20   1   0    0.16    0.40 
  21  -1   0    0.41    0.37 
 -21  -1   0    0.76    0.36 
  21  -1   0    0.22    0.53 
 -21  -1   0    0.41    0.33 
 -21  -1   0    0.76    0.42 
  21  -1   0    0.30    0.70 
 -21   1   0    0.87    0.36 
 -21   1   0    0.71    0.43 
  21   1   0    2.16    0.88 
  21   1   0    0.57    0.54 
  21   1   0    0.29    0.41 
 -22  -1   0   -0.01    0.38 
  22  -1   0    0.93    0.79 
 -22  -1   0    0.07    0.30 
  22  -1   0    0.02    0.57 
  22   1   0    0.64    0.47 
 -22   1   0   -0.18    0.29 
 -22   1   0   -0.07    0.33 
  22   1   0    0.24    0.47 
  22   1   0    0.56    0.77 
  23  -1   0    0.32    0.74 
 -23  -1   0    1.43    0.45 
 -23  -1   0    0.81    0.48 
  23  -1   0    1.77    1.00 
 -23   1   0    1.37    0.50 
 -23   1   0    0.94    0.46 
  23   1   0    0.82    0.79 
  23   1   0    0.43    0.45 
  23   1   0    1.62    0.74 
  24  -1   0    1.27    1.13 
  24  -1   0    1.03    0.84 
 -24  -1   0    2.03    0.57 
  24   1   0    2.95    1.22 
  24   1   0    2.44    0.67 
  24   1   0    2.46    0.88 
 -24   1   0    3.42    0.72 
 -24   1   0    1.35    0.56 
 -25  -1   0    1.05    0.43 
  25  -1   0   -0.46    0.72 
  25  -1   0    2.12    1.12 
 -25   1   0    1.12    0.54 
  25   1   0    0.36    0.95 
  25   1   0    1.11    0.83 
  25   1   0    1.49    0.64 
 -25   1   0    1.57    0.59 
   0  -2   0    4.40    0.47 
   0  -2   0    3.86    0.48 
   0  -2   0    3.32    0.44 
   0  -2   0    4.18    0.41 
   0  -2   0    2.73    0.46 
   0  -2   0    3.75    0.40 
   0   2   0    3.61    0.47 
   0   2   0    3.60    0.39 
   0   2   0    3.77    0.40 
   0   2   0    3.55    0.40 
   1  -2   0   96.59   10.13 
   1  -2   0   80.56   10.20 
   1  -2   0   98.41    9.06 
  -1  -2   0  107.20   10.78 
  -1  -2   0   96.00    9.03 
   1  -2   0   96.47    9.01 
  -1  -2   0   96.50   10.13 
   1  -2   0   88.76    9.76 
   1  -2   0  106.59    9.58 
   1  -2   0   96.86   10.77 
  -1  -2   0   93.35    9.09 
   1  -2   0   95.20    8.83 
  -1  -2   0  109.99    9.99 
  -1   2   0   93.80    9.00 
  -1   2   0   81.30   10.76 
  -1   2   0   87.06    9.58 
   1   2   0  101.74    9.58 
  -1   2   0   92.94    9.76 
  -1   2   0  102.54    9.06 
   1   2   0   96.96    9.09 
   1   2   0  110.33    9.76 
  -1   2   0   93.32    8.81 
   1   2   0  100.22    8.82 
   1   2   0   92.40    9.02 
   2  -2   0  186.16   19.14 
  -2  -2   0  191.36   16.94 
  -2  -2   0  184.03   18.26 
   2  -2   0  179.82   18.03 
   2  -2   0  190.46   16.89 
   2  -2   0  194.60   16.53 
  -2  -2   0  198.20   18.72 
   2  -2   0  182.62   18.31 
   2  -2   0  182.60   17.00 
  -2  -2   0  158.57   18.01 
  -2   2   0  187.55   16.53 
   2   2   0  165.40   18.02 
   2   2   0  150.92   18.26 
  -2   2   0  166.22   19.14 
   2   2   0  189.03   19.16 
  -2   2   0  200.55   18.03 
   2   2   0  185.56   16.93 
   2   2   0  182.10   17.05 
   2   2   0  176.69   16.53 
  -2   2   0  178.04   20.20 
   3  -2   0  195.61   19.53 
  -3  -2   0  214.54   19.60 
  -3  -2   0  202.73   22.16 
   3  -2   0  221.75   21.20 
   3  -2   0  213.58   21.95 
   3  -2   0  215.26   19.12 
   3  -2   0  210.69   22.14 
   3  -2   0  208.67   20.88 
  -3  -2   0  216.62   21.96 
   3  -2   0  176.15   23.37 
   3  -2   0  239.43   19.66 
   3   2   0  179.68   22.16 
   3   2   0  206.22   19.74 
  -3   2   0  217.15   20.88 
  -3   2   0  226.76   22.15 
   3   2   0  228.80   19.60 
  -3   2   0  206.78   19.12 
   3   2   0  197.23   21.13 
  -4  -2   0  309.30   35.09 
  -4  -2   0  289.22   33.17 
   4  -2   0  316.10   35.06 
   4  -2   0  315.01   31.16 
  -4  -2   0  375.24   31.03 
   4  -2   0  369.35   30.28 
   4  -2   0  335.20   33.07 
  -4  -2   0  373.45   37.05 
   4  -2   0  342.17   34.73 
   4  -2   0  294.42   37.01 
   4   2   0  285.19   33.06 
   4   2   0  372.36   31.02 
  -4   2   0  365.28   30.27 
   4   2   0  353.71   31.25 
   4   2   0  343.49   30.29 
   4   2   0  288.77   33.46 
  -5  -2   0   24.99    2.79 
   5  -2   0   27.35    2.77 
   5  -2   0   24.35    2.55 
   5  -2   0   23.31    2.58 
  -5  -2   0   21.76    2.48 
  -5  -2   0   25.61    2.39 
  -5  -2   0   25.75    2.64 
   5  -2   0   25.52    2.31 
   5  -2   0   26.76    2.63 
   5  -2   0   22.19    2.25 
  -5  -2   0   22.74    2.63 
   5  -2   0   27.68    2.28 
  -5   2   0   20.66    2.62 
   5   2   0   21.88    2.40 
   5   2   0   23.09    2.27 
  -5   2   0   22.84    2.76 
   5   2   0   23.88    2.55 
   5   2   0   21.90    2.36 
   5   2   0   27.51    2.68 
   6  -2   0  166.63   15.46 
   6  -2   0  147.31   17.39 
  -6  -2   0  162.46   17.43 
  -6  -2   0  161.80   17.04 
   6  -2   0  170.50   16.49 
  -6  -2   0  159.64   15.43 
  -6  -2   0  140.65   18.38 
   6  -2   0  165.43   18.36 
   6  -2   0  171.92   16.70 
   6  -2   0  173.41   15.01 
   6  -2   0  179.65   15.33 
  -6   2   0  191.70   15.46 
   6   2   0  153.66   15.41 
  -6   2   0  143.07   16.46 
   6   2   0  158.85   16.47 
   6   2   0  180.83   15.03 
  -6   2   0  184.39   17.41 
   6   2   0  168.61   15.56 
   6   2   0  144.05   17.43 
   7  -2   0   17.23    1.73 
  -7  -2   0   16.12    1.69 
  -7  -2   0   11.94    1.76 
  -7  -2   0   13.29    1.58 
   7  -2   0   14.75    1.47 
  -7  -2   0   16.39    1.56 
   7  -2   0   15.54    1.43 
  -7  -2   0   15.12    1.71 
   7  -2   0   15.27    1.41 
   7  -2   0   15.13    1.69 
   7  -2   0   14.94    1.67 
  -7   2   0   17.57    1.77 
   7   2   0   13.82    1.69 
   7   2   0   14.47    1.53 
  -7   2   0   15.56    1.67 
  -7   2   0   15.72    1.47 
   7   2   0   13.71    1.57 
   7   2   0   14.60    1.43 
  -7   2   0   16.08    1.59 
   7   2   0   14.39    1.71 
  -8  -2   0  104.06    9.52 
   8  -2   0   92.70    8.41 
   8  -2   0   88.56    8.31 
  -8  -2   0   83.18   10.00 
  -8  -2   0   83.36    9.29 
   8  -2   0  100.88    9.16 
  -8  -2   0  105.08    8.98 
  -8  -2   0  100.45    9.41 
  -8  -2   0   85.61    8.43 
   8  -2   0   75.57    9.45 
   8  -2   0   86.74    8.13 
   8  -2   0   90.96    9.05 
   8   2   0   76.47    9.02 
   8   2   0   75.04    8.15 
   8   2   0   89.84    8.52 
  -8   2   0   83.20    9.46 
  -8   2   0   79.72    8.42 
   8   2   0  105.39    9.55 
  -8   2   0   90.13    8.96 
  -8   2   0   86.51    9.98 
   8   2   0   98.25    8.43 
  -9  -2   0   40.72    3.87 
   9  -2   0   31.12    3.85 
  -9  -2   0   37.34    3.85 
   9  -2   0   37.99    3.45 
   9  -2   0   31.92    3.28 
  -9  -2   0   35.81    3.91 
   9  -2   0   34.62    3.80 
  -9  -2   0   41.47    3.68 
   9  -2   0   38.03    3.83 
  -9  -2   0   35.07    3.50 
   9  -2   0   42.76    4.11 
  -9  -2   0   39.38    4.11 
   9  -2   0   35.35    3.37 
  -9   2   0   42.99    4.10 
  -9   2   0   32.90    3.86 
   9   2   0   36.87    3.48 
  -9   2   0   35.44    3.66 
   9   2   0   34.26    3.54 
   9   2   0   32.14    3.78 
   9   2   0   30.56    3.30 
  -9   2   0   35.04    3.68 
  -9   2   0   32.45    3.36 
 -10  -2   0    1.04    0.25 
  10  -2   0    0.38    0.29 
 -10  -2   0    0.76    0.30 
  10  -2   0    0.65    0.21 
  10  -2   0    0.79    0.22 
 -10  -2   0    1.03    0.34 
 -10  -2   0    1.45    0.30 
 -10  -2   0    0.84    0.27 
 -10  -2   0    0.24    0.21 
  10  -2   0    0.92    0.16 
  10  -2   0    1.37    0.43 
 -10   2   0    0.99    0.25 
 -10   2   0    0.87    0.22 
  10   2   0    0.73    0.25 
 -10   2   0    1.09    0.16 
  10   2   0    1.15    0.43 
  10   2   0    0.84    0.31 
 -10   2   0    1.39    0.28 
 -10   2   0    0.58    0.26 
 -11  -2   0    0.16    0.18 
  11  -2   0   -0.01    0.09 
 -11  -2   0   -0.22    0.17 
  11  -2   0   -0.03    0.15 
  11  -2   0   -0.08    0.12 
 -11  -2   0    0.10    0.23 
 -11  -2   0    0.27    0.18 
  11  -2   0    0.50    0.40 
 -11  -2   0    0.20    0.15 
  11  -2   0    0.08    0.26 
  11   2   0   -0.17    0.14 
 -11   2   0    0.20    0.15 
  11   2   0   -0.17    0.29 
 -11   2   0    0.05    0.13 
 -11   2   0    0.19    0.20 
  11   2   0    0.36    0.27 
 -11   2   0   -0.06    0.16 
 -11   2   0   -0.08    0.14 
 -11   2   0    0.09    0.09 
  12  -2   0   26.53    2.80 
 -12  -2   0   28.67    2.92 
  12  -2   0   22.10    3.11 
 -12  -2   0   35.11    3.21 
  12  -2   0   23.75    3.09 
 -12  -2   0   27.52    2.95 
  12  -2   0   26.71    3.13 
 -12  -2   0   25.23    3.10 
  12  -2   0   29.78    2.71 
 -12  -2   0   30.16    3.34 
 -12   2   0   24.81    3.28 
 -12   2   0   35.48    3.03 
  12   2   0   25.04    3.15 
  12   2   0   26.01    2.81 
 -12   2   0   32.72    2.73 
 -12   2   0   33.39    3.16 
 -12   2   0   28.97    3.14 
 -12   2   0   26.58    2.94 
  12   2   0   28.59    2.91 
  13  -2   0    9.36    1.44 
  13  -2   0    9.41    1.16 
 -13  -2   0   12.99    1.36 
  13  -2   0    9.83    1.29 
 -13  -2   0    9.82    1.18 
 -13  -2   0   11.33    1.20 
  13  -2   0   12.02    1.08 
 -13  -2   0   10.55    1.32 
  13  -2   0   10.31    1.56 
 -13  -2   0   13.44    1.42 
 -13   2   0   10.52    1.30 
 -13   2   0   11.81    1.28 
  13   2   0    9.75    1.18 
  13   2   0   10.15    1.28 
 -13   2   0    9.14    1.19 
 -13   2   0   10.36    1.35 
  13   2   0   10.29    1.57 
 -13   2   0   11.26    1.09 
  13   2   0   11.29    1.36 
 -14  -2   0   20.71    2.41 
 -14  -2   0   17.51    2.55 
 -14  -2   0   26.15    2.44 
 -14  -2   0   25.88    2.79 
  14  -2   0   17.75    2.60 
  14  -2   0   27.25    2.24 
  14  -2   0   17.81    2.76 
 -14  -2   0   22.98    2.69 
  14  -2   0   24.57    2.35 
  14  -2   0   21.83    2.64 
 -14   2   0   24.94    2.51 
  14   2   0   20.04    2.69 
 -14   2   0   23.50    2.44 
 -14   2   0   28.47    2.77 
  14   2   0   25.52    2.47 
 -14   2   0   22.18    2.61 
  14   2   0   24.39    2.37 
 -14   2   0   21.30    2.24 
  15  -2   0   23.16    2.02 
 -15  -2   0   20.47    2.35 
 -15  -2   0   19.45    2.18 
  15  -2   0   22.05    2.46 
 -15  -2   0   19.38    2.17 
  15  -2   0   23.45    2.14 
 -15  -2   0   19.37    2.49 
  15  -2   0   17.35    2.60 
  15   2   0   22.83    2.57 
 -15   2   0   21.33    2.20 
 -15   2   0   17.75    2.23 
 -15   2   0   19.35    2.36 
  15   2   0   18.16    2.29 
  15   2   0   22.12    2.25 
  15   2   0   19.10    2.12 
 -15   2   0   24.38    2.50 
  16  -2   0    4.20    0.98 
  16  -2   0    7.13    1.27 
 -16  -2   0    5.50    0.78 
 -16  -2   0    5.27    0.92 
  16  -2   0    6.60    0.65 
 -16  -2   0    6.33    0.80 
 -16  -2   0    4.82    0.88 
  16  -2   0    6.50    0.82 
 -16   2   0    5.29    0.87 
 -16   2   0    6.60    0.91 
  16   2   0    4.96    1.13 
  16   2   0    3.69    0.83 
  16   2   0    7.30    0.89 
 -16   2   0    5.54    0.77 
  16   2   0    6.69    0.96 
 -16   2   0    5.26    0.90 
  17  -2   0    1.98    0.69 
 -17  -2   0    1.88    0.53 
  17  -2   0    1.37    0.75 
 -17  -2   0    3.28    0.66 
  17  -2   0    2.80    0.53 
 -17  -2   0    3.52    0.53 
 -17   2   0    2.49    0.54 
  17   2   0    3.84    0.73 
  17   2   0    4.59    0.73 
  17   2   0    2.47    0.52 
  17   2   0    2.11    0.81 
 -17   2   0    3.06    0.60 
  18  -2   0    6.68    1.12 
 -18  -2   0    4.28    0.79 
 -18  -2   0    4.46    0.65 
 -18  -2   0    5.36    0.84 
  18  -2   0    3.89    0.66 
  18  -2   0    4.29    1.06 
  18   2   0    4.45    0.81 
  18   2   0    3.70    0.65 
  18   2   0    3.41    0.76 
  18   2   0    1.96    0.95 
 -18   2   0    3.63    0.69 
 -18   2   0    3.10    0.68 
 -19  -2   0    2.38    0.54 
  19  -2   0    1.24    0.71 
  19  -2   0    1.97    0.46 
 -19  -2   0    0.97    0.45 
  19  -2   0    0.28    0.52 
 -19  -2   0    1.54    0.38 
  19   2   0    0.90    0.45 
 -19   2   0    1.00    0.43 
 -19   2   0    1.65    0.46 
  19   2   0    0.89    0.39 
  19   2   0    2.08    0.83 
  19   2   0    1.51    0.56 
 -20  -2   0   15.56    2.29 
 -20  -2   0   17.68    2.02 
  20  -2   0   14.88    2.43 
  20  -2   0   16.10    2.58 
 -20  -2   0   19.92    2.22 
 -20   2   0   19.61    2.22 
  20   2   0   24.27    2.21 
 -20   2   0   22.38    2.15 
  20   2   0   19.10    2.26 
  20   2   0   16.09    1.96 
  20   2   0   15.12    2.52 
  21  -2   0    1.76    0.80 
 -21  -2   0    0.79    0.47 
  21  -2   0    2.97    0.98 
 -21  -2   0    0.73    0.34 
 -21   2   0    1.04    0.44 
  21   2   0    1.75    0.49 
  21   2   0    2.24    0.90 
  21   2   0    1.76    0.65 
  21   2   0    0.38    0.43 
 -21   2   0    1.05    0.45 
  22  -2   0   -0.70    0.60 
 -22  -2   0    0.03    0.37 
 -22  -2   0    0.04    0.27 
  22  -2   0   -0.52    0.63 
 -22   2   0    0.62    0.45 
  22   2   0   -0.02    0.72 
  22   2   0    0.28    0.41 
  22   2   0    0.52    0.50 
 -22   2   0    0.73    0.45 
 -23  -2   0    2.62    0.60 
 -23  -2   0    4.36    0.83 
  23  -2   0    2.18    1.04 
  23  -2   0    1.86    0.91 
  23   2   0    2.52    1.08 
  23   2   0    5.10    0.96 
 -23   2   0    2.34    0.64 
  23   2   0    3.91    0.96 
 -23   2   0    2.27    0.64 
 -24  -2   0    1.46    0.59 
  24  -2   0    2.45    1.19 
 -24  -2   0    0.82    0.41 
  24  -2   0    2.01    0.91 
  24   2   0    3.07    1.21 
  24   2   0    0.69    0.72 
  24   2   0    2.09    0.69 
 -24   2   0    1.29    0.51 
 -24   2   0    1.94    0.59 
  25  -2   0    1.66    1.15 
  25  -2   0    0.82    0.93 
 -25  -2   0    1.46    0.66 
  25   2   0   -0.05    0.50 
 -25   2   0    0.55    0.47 
 -25   2   0    1.03    0.49 
  25   2   0    1.57    1.22 
  25   2   0   -0.34    0.59 
   0  -3   0   -0.08    0.10 
   0  -3   0    0.11    0.11 
   0  -3   0    0.02    0.13 
   0  -3   0    0.07    0.13 
   0  -3   0    0.09    0.12 
   0  -3   0   -0.03    0.13 
   0  -3   0   -0.07    0.09 
   0  -3   0   -0.21    0.13 
   0   3   0   -0.02    0.08 
   0   3   0    0.03    0.09 
   0   3   0    0.02    0.09 
   1  -3   0    5.57    0.62 
   1  -3   0    5.79    0.75 
   1  -3   0    6.40    0.76 
   1  -3   0    6.07    0.62 
  -1  -3   0    6.68    0.74 
  -1  -3   0    7.77    0.70 
  -1  -3   0    4.88    0.70 
   1  -3   0    5.19    0.73 
  -1  -3   0    5.29    0.72 
   1  -3   0    5.53    0.59 
   1  -3   0    5.12    0.72 
  -1  -3   0    6.48    0.66 
   1  -3   0    6.45    0.72 
   1  -3   0    8.52    0.75 
  -1  -3   0    6.68    0.77 
  -1   3   0    6.18    0.60 
   1   3   0    7.31    0.63 
  -1   3   0    5.78    0.61 
  -1   3   0    6.03    0.60 
   1   3   0    4.98    0.60 
  -1   3   0    5.72    0.60 
   1   3   0    6.06    0.64 
   1   3   0    5.68    0.63 
  -2  -3   0    0.76    0.20 
   2  -3   0    0.53    0.22 
  -2  -3   0    0.67    0.18 
   2  -3   0    0.80    0.14 
   2  -3   0    0.66    0.18 
   2  -3   0    1.06    0.16 
   2  -3   0    0.44    0.17 
  -2  -3   0    0.30    0.16 
  -2  -3   0    1.16    0.25 
   2  -3   0    0.57    0.22 
   2  -3   0    0.43    0.13 
  -2  -3   0    0.65    0.25 
  -2  -3   0    0.78    0.17 
   2   3   0    0.89    0.20 
  -2   3   0    0.76    0.15 
   2   3   0    0.67    0.18 
   2   3   0    0.76    0.16 
  -2   3   0    0.75    0.18 
   2   3   0    0.39    0.15 
  -2   3   0    0.67    0.12 
  -2   3   0    0.48    0.13 
   2   3   0    0.94    0.23 
   3  -3   0    1.14    0.20 
  -3  -3   0    1.83    0.36 
   3  -3   0    1.83    0.28 
  -3  -3   0    1.49    0.24 
  -3  -3   0    1.19    0.29 
   3  -3   0    0.97    0.30 
  -3  -3   0    1.52    0.29 
   3  -3   0    1.57    0.27 
   3  -3   0    1.65    0.33 
  -3  -3   0    1.65    0.24 
  -3  -3   0    1.17    0.27 
   3  -3   0    1.13    0.25 
   3  -3   0    1.49    0.19 
  -3  -3   0    1.82    0.35 
   3   3   0    1.62    0.25 
  -3   3   0    1.40    0.27 
  -3   3   0    1.38    0.22 
  -3   3   0    1.57    0.27 
   3   3   0    1.72    0.27 
   3   3   0    1.42    0.28 
  -3   3   0    2.09    0.28 
   3   3   0    1.49    0.27 
   4  -3   0   31.22    3.31 
  -4  -3   0   31.71    3.41 
   4  -3   0   29.47    3.21 
  -4  -3   0   31.39    3.58 
   4  -3   0   35.18    3.39 
   4  -3   0   31.46    2.95 
  -4  -3   0   33.58    3.42 
  -4  -3   0   29.57    3.36 
  -4  -3   0   33.77    3.05 
   4  -3   0   34.01    3.41 
   4  -3   0   30.59    2.95 
   4   3   0   29.37    3.02 
  -4   3   0   32.65    2.91 
   4   3   0   34.41    3.08 
   4   3   0   31.11    2.92 
  -4   3   0   29.30    3.38 
  -4   3   0   28.47    3.55 
   4   3   0   28.72    3.21 
   5  -3   0   93.66   10.38 
   5  -3   0  115.70   10.45 
  -5  -3   0   83.28   11.02 
   5  -3   0   97.15    9.18 
  -5  -3   0  105.83    9.30 
   5  -3   0   98.37   10.06 
  -5  -3   0  104.25   10.49 
   5  -3   0   96.96    9.89 
  -5  -3   0  112.11    9.89 
   5   3   0   91.08    9.88 
   5   3   0  106.04    9.03 
  -5   3   0   96.53   10.44 
   5   3   0   95.59    9.27 
   5   3   0   95.50    9.35 
  -5   3   0   83.77   11.00 
  -5   3   0  100.39    9.00 
   6  -3   0    0.09    0.06 
   6  -3   0   -0.13    0.10 
   6  -3   0    0.06    0.13 
   6  -3   0    0.12    0.06 
   6  -3   0   -0.05    0.19 
  -6  -3   0   -0.03    0.17 
  -6  -3   0    0.28    0.17 
   6  -3   0    0.01    0.06 
  -6  -3   0    0.16    0.17 
  -6  -3   0    0.05    0.13 
   6  -3   0    0.04    0.18 
  -6  -3   0    0.25    0.20 
  -6  -3   0   -0.20    0.16 
   6  -3   0    0.09    0.12 
  -6   3   0    0.00    0.11 
   6   3   0    0.08    0.11 
   6   3   0    0.31    0.19 
   6   3   0   -0.01    0.17 
  -6   3   0    0.06    0.11 
   6   3   0   -0.03    0.18 
   7  -3   0   58.75    6.53 
  -7  -3   0   66.01    6.50 
   7  -3   0   59.81    5.77 
   7  -3   0   69.85    5.72 
  -7  -3   0   56.69    6.20 
   7  -3   0   61.95    5.71 
  -7  -3   0   65.14    5.88 
   7  -3   0   55.88    6.54 
  -7  -3   0   65.75    6.94 
   7  -3   0   54.74    6.88 
  -7  -3   0   51.44    6.51 
   7  -3   0   62.99    6.28 
   7  -3   0   57.17    6.36 
  -7  -3   0   62.59    6.60 
   7   3   0   61.74    5.65 
   7   3   0   60.24    6.27 
  -7   3   0   70.53    6.25 
   7   3   0   60.45    5.93 
   7   3   0   64.69    5.86 
  -8  -3   0   27.58    2.84 
   8  -3   0   25.18    2.76 
   8  -3   0   29.15    2.83 
   8  -3   0   22.45    2.91 
   8  -3   0   27.11    2.83 
  -8  -3   0   28.82    2.66 
  -8  -3   0   26.99    2.98 
  -8  -3   0   25.09    2.84 
  -8  -3   0   25.52    2.81 
   8  -3   0   25.02    2.44 
   8  -3   0   23.61    2.78 
  -8  -3   0   25.78    2.57 
   8   3   0   27.22    2.77 
  -8   3   0   22.20    2.92 
  -8   3   0   26.73    2.79 
   8   3   0   23.66    2.40 
  -8   3   0   26.23    2.70 
   8   3   0   25.25    2.59 
   8   3   0   27.73    2.55 
  -9  -3   0    8.97    1.02 
   9  -3   0    6.97    1.08 
   9  -3   0    7.39    0.78 
  -9  -3   0    7.09    1.02 
   9  -3   0    7.90    1.11 
  -9  -3   0    9.98    0.91 
  -9  -3   0    6.72    0.94 
  -9  -3   0    7.40    1.06 
   9  -3   0    6.97    0.90 
   9  -3   0    6.78    0.93 
  -9  -3   0    9.27    0.98 
  -9   3   0    6.60    0.94 
   9   3   0    6.61    1.06 
  -9   3   0    8.53    1.03 
   9   3   0    6.36    0.96 
  -9   3   0    7.04    0.91 
   9   3   0    8.55    0.79 
   9   3   0    7.54    0.93 
  -9   3   0    7.03    0.95 
 -10  -3   0    9.82    1.38 
 -10  -3   0   14.44    1.30 
  10  -3   0   10.61    1.14 
 -10  -3   0    8.58    1.32 
 -10  -3   0   11.42    1.38 
  10  -3   0   10.45    1.50 
  10  -3   0   12.85    1.11 
  10  -3   0   11.71    1.52 
  10  -3   0   11.63    1.32 
 -10  -3   0   10.50    1.41 
  10   3   0   13.49    1.14 
  10   3   0   11.10    1.38 
  10   3   0   10.37    1.49 
 -10   3   0   10.82    1.38 
  10   3   0   11.58    1.25 
 -10   3   0   10.31    1.31 
 -10   3   0   11.86    1.37 
 -11  -3   0    0.42    0.23 
 -11  -3   0    0.10    0.17 
 -11  -3   0    0.15    0.20 
  11  -3   0    0.16    0.05 
  11  -3   0    0.36    0.33 
 -11  -3   0    0.32    0.29 
  11  -3   0   -0.12    0.30 
  11  -3   0    0.01    0.13 
 -11  -3   0   -0.08    0.18 
  11  -3   0    0.03    0.09 
  11  -3   0    0.00    0.14 
  11   3   0    0.32    0.23 
 -11   3   0   -0.18    0.13 
 -11   3   0   -0.13    0.13 
  11   3   0   -0.06    0.23 
  11   3   0    0.08    0.33 
 -11   3   0   -0.22    0.21 
  12  -3   0   15.21    1.86 
 -12  -3   0   17.44    1.63 
  12  -3   0   17.07    1.44 
 -12  -3   0   15.58    1.78 
 -12  -3   0   15.09    1.81 
  12  -3   0   12.73    1.73 
  12  -3   0   14.55    1.43 
  12  -3   0   15.06    1.54 
 -12  -3   0   13.70    1.87 
 -12  -3   0   19.81    1.87 
  12  -3   0   16.05    2.05 
 -12  -3   0   12.27    1.65 
 -12   3   0   12.52    1.82 
 -12   3   0   15.67    1.73 
  12   3   0   18.25    1.66 
  12   3   0   16.36    1.72 
  12   3   0   13.33    1.95 
 -12   3   0   15.51    1.79 
  13  -3   0    2.66    0.67 
  13  -3   0    4.35    0.82 
 -13  -3   0    3.58    0.54 
  13  -3   0    3.07    0.47 
 -13  -3   0    3.31    0.48 
 -13  -3   0    2.66    0.58 
  13  -3   0    3.50    0.34 
 -13  -3   0    4.05    0.68 
  13  -3   0    3.03    0.54 
 -13  -3   0    1.65    0.52 
 -13  -3   0    3.47    0.60 
  13   3   0    2.91    0.54 
 -13   3   0    3.06    0.58 
 -13   3   0    4.31    0.61 
  13   3   0    1.49    0.68 
  13   3   0    3.51    0.64 
 -13   3   0    3.72    0.62 
  14  -3   0   -0.26    0.31 
 -14  -3   0    0.11    0.28 
  14  -3   0    0.29    0.20 
  14  -3   0    0.56    0.46 
 -14  -3   0    0.22    0.19 
 -14  -3   0   -0.05    0.24 
 -14  -3   0   -0.10    0.14 
  14   3   0    0.46    0.35 
  14   3   0    0.05    0.50 
 -14   3   0    0.26    0.23 
  14   3   0   -0.19    0.24 
  14   3   0    0.30    0.24 
 -14   3   0    0.42    0.23 
 -14   3   0    0.15    0.30 
 -15  -3   0    6.13    0.83 
  15  -3   0    6.71    0.79 
 -15  -3   0    6.96    0.77 
  15  -3   0    5.78    1.10 
 -15  -3   0    6.99    1.03 
 -15  -3   0    4.68    0.92 
  15  -3   0    5.24    1.13 
 -15   3   0    6.42    0.98 
  15   3   0    4.55    1.11 
  15   3   0    5.36    0.96 
 -15   3   0    6.93    0.97 
  15   3   0    6.01    0.87 
  15   3   0    7.15    0.97 
 -16  -3   0   10.67    1.62 
 -16  -3   0   12.04    1.38 
 -16  -3   0   12.61    1.58 
  16  -3   0   12.73    1.34 
  16  -3   0   12.40    1.82 
  16  -3   0   13.76    1.97 
  16   3   0   12.83    1.42 
 -16   3   0   13.64    1.59 
  16   3   0   14.13    2.00 
 -16   3   0   12.20    1.51 
  16   3   0   13.23    1.52 
  16   3   0   12.02    1.59 
 -17  -3   0    1.61    0.52 
 -17  -3   0    2.16    0.43 
 -17  -3   0    2.59    0.60 
  17  -3   0    2.12    0.79 
  17  -3   0    1.10    0.60 
  17   3   0    4.08    0.69 
  17   3   0    1.65    0.81 
 -17   3   0    1.76    0.51 
  17   3   0    2.28    0.63 
  17   3   0    2.13    0.52 
 -17   3   0    2.00    0.51 
  18  -3   0   -0.75    0.40 
 -18  -3   0   -0.08    0.29 
  18  -3   0    0.21    0.55 
 -18  -3   0   -0.31    0.29 
 -18  -3   0   -0.18    0.18 
  18   3   0    0.24    0.33 
  18   3   0   -0.39    0.30 
  18   3   0    0.45    0.42 
 -18   3   0   -0.33    0.31 
  18   3   0   -0.22    0.50 
 -18   3   0    0.04    0.29 
 -19  -3   0    2.76    0.66 
  19  -3   0    0.86    0.66 
 -19  -3   0    3.14    0.53 
 -19  -3   0    3.75    0.74 
  19  -3   0    1.67    0.82 
  19   3   0    2.08    0.68 
  19   3   0    1.27    0.75 
  19   3   0    2.19    0.55 
 -19   3   0    2.04    0.60 
 -19   3   0    3.12    0.68 
  19   3   0    2.51    0.67 
  20  -3   0   -0.62    0.45 
  20  -3   0    1.50    0.78 
 -20  -3   0    0.05    0.24 
 -20  -3   0   -0.21    0.32 
 -20  -3   0    0.09    0.35 
  20   3   0    0.22    0.40 
  20   3   0    0.20    0.33 
  20   3   0    0.43    0.65 
  20   3   0    0.02    0.42 
 -20   3   0    0.05    0.29 
 -20   3   0   -0.12    0.33 
 -21  -3   0    2.39    0.63 
 -21  -3   0    0.57    0.43 
  21  -3   0    2.92    1.02 
  21  -3   0    1.67    0.90 
 -21  -3   0    1.80    0.44 
 -21   3   0    3.14    0.70 
  21   3   0    0.74    0.50 
 -21   3   0    2.40    0.61 
  21   3   0   -0.09    0.62 
  21   3   0    2.41    0.71 
  21   3   0    1.89    0.51 
 -22  -3   0    1.28    0.57 
  22  -3   0    1.57    0.76 
  22  -3   0    2.19    1.02 
 -22   3   0    1.55    0.60 
  22   3   0    1.29    0.87 
  22   3   0    1.65    0.64 
  22   3   0    1.04    0.59 
 -22   3   0    0.80    0.50 
 -23  -3   0    5.75    1.01 
  23  -3   0    3.79    1.36 
  23  -3   0    3.60    1.13 
 -23   3   0    3.46    0.81 
  23   3   0    4.28    0.91 
  23   3   0    2.80    1.27 
 -23   3   0    4.52    0.90 
  23   3   0    3.75    0.99 
 -24  -3   0    1.56    0.58 
  24  -3   0   -0.09    0.85 
  24  -3   0    1.63    0.90 
 -24   3   0    0.69    0.45 
  24   3   0    0.22    0.89 
  24   3   0    1.05    0.65 
 -24   3   0    0.86    0.54 
   0  -4   0    0.91    0.23 
   0  -4   0    0.80    0.24 
   0  -4   0    0.78    0.25 
   0  -4   0    0.61    0.25 
   0  -4   0    1.28    0.25 
   0  -4   0    0.73    0.20 
   0  -4   0    0.38    0.21 
   0   4   0    0.77    0.18 
   0   4   0    0.80    0.19 
   0   4   0    0.68    0.18 
  -1  -4   0    7.58    0.91 
   1  -4   0    7.59    0.80 
   1  -4   0    6.27    0.98 
  -1  -4   0    7.82    0.87 
  -1  -4   0    8.23    0.83 
  -1  -4   0    8.07    0.93 
   1  -4   0    6.99    0.90 
   1  -4   0    8.78    0.92 
  -1  -4   0    9.07    0.99 
   1  -4   0    9.15    0.94 
  -1  -4   0    6.49    0.91 
   1  -4   0    6.93    0.89 
   1  -4   0    5.66    0.88 
  -1   4   0    7.65    0.78 
   1   4   0    7.03    0.79 
  -1   4   0    7.68    0.77 
   1   4   0    6.94    0.77 
   1   4   0    7.75    0.80 
  -1   4   0    6.29    0.75 
  -2  -4   0   14.33    1.86 
  -2  -4   0   13.99    1.83 
   2  -4   0   15.50    1.61 
   2  -4   0   17.77    1.85 
  -2  -4   0   14.60    1.73 
  -2  -4   0   20.46    1.94 
   2  -4   0   14.56    1.62 
   2  -4   0   14.32    1.86 
   2  -4   0   14.26    1.80 
   2  -4   0   18.11    1.82 
  -2  -4   0   17.17    1.85 
  -2  -4   0   14.66    1.65 
   2   4   0   16.84    1.58 
   2   4   0   15.43    1.63 
  -2   4   0   18.40    1.58 
  -2   4   0   18.87    1.65 
   2   4   0   15.69    1.65 
   2   4   0   15.87    1.63 
  -2   4   0   15.82    1.57 
   3  -4   0   34.51    3.02 
  -3  -4   0   29.40    3.15 
  -3  -4   0   29.84    3.05 
   3  -4   0   26.74    2.62 
   3  -4   0   25.81    3.01 
   3  -4   0   27.94    2.62 
   3  -4   0   31.25    2.78 
  -3  -4   0   28.14    2.70 
  -3  -4   0   27.05    2.83 
   3  -4   0   23.34    2.91 
  -3  -4   0   26.48    2.98 
   3   4   0   24.47    2.78 
  -3   4   0   26.38    2.77 
   3   4   0   26.30    2.68 
   3   4   0   29.97    2.59 
  -3   4   0   22.59    3.12 
  -3   4   0   26.63    2.57 
   3   4   0   26.27    2.66 
   4  -4   0    9.69    1.09 
  -4  -4   0    8.56    1.09 
   4  -4   0    9.40    1.04 
  -4  -4   0    7.63    1.01 
  -4  -4   0    7.70    0.94 
   4  -4   0    9.54    0.98 
  -4  -4   0    8.08    1.05 
   4  -4   0    8.51    1.08 
   4  -4   0    8.72    0.88 
   4  -4   0    8.27    0.86 
  -4  -4   0    5.46    1.07 
  -4  -4   0   13.25    1.18 
  -4  -4   0    7.22    0.93 
  -4   4   0    9.72    1.08 
   4   4   0    8.11    0.95 
   4   4   0    9.40    0.99 
  -4   4   0    9.24    0.87 
   4   4   0    8.94    1.00 
   4   4   0    8.57    0.89 
  -4   4   0    9.67    1.04 
  -5  -4   0   72.14    7.76 
   5  -4   0   79.66    7.73 
  -5  -4   0   74.98    7.64 
   5  -4   0   72.47    6.80 
   5  -4   0   84.02    7.74 
   5  -4   0   62.38    8.12 
  -5  -4   0   73.93    6.90 
   5  -4   0   73.26    7.30 
   5  -4   0   75.15    6.79 
   5  -4   0   68.49    7.47 
   5   4   0   69.66    6.87 
  -5   4   0   71.25    7.72 
  -5   4   0   68.89    8.13 
  -5   4   0   80.39    7.36 
   5   4   0   68.40    6.93 
  -5   4   0   73.26    6.65 
   5   4   0   73.37    6.68 
   5   4   0   64.23    7.29 
   6  -4   0   95.20    9.88 
  -6  -4   0   97.62    9.88 
   6  -4   0   98.24    9.20 
   6  -4   0   98.34    9.17 
   6  -4   0  102.87   11.00 
   6  -4   0  100.83   10.09 
  -6  -4   0   90.61   10.28 
   6  -4   0   91.92    9.20 
  -6  -4   0  104.84   11.05 
   6  -4   0   93.08   10.40 
  -6  -4   0  102.98    9.32 
   6   4   0   85.54    9.87 
  -6   4   0  101.66    9.90 
   6   4   0   95.93    9.28 
   6   4   0  101.43    9.37 
   6   4   0  101.56    9.03 
  -6   4   0  106.65   10.45 
  -6   4   0   89.26   11.00 
  -6   4   0  108.75   10.43 
   7  -4   0   29.87    3.19 
   7  -4   0   30.50    3.13 
  -7  -4   0   28.31    3.19 
  -7  -4   0   21.80    3.13 
   7  -4   0   30.30    2.70 
  -7  -4   0   25.09    3.15 
   7  -4   0   25.92    3.27 
   7  -4   0   31.16    3.15 
  -7  -4   0   33.82    2.99 
   7  -4   0   29.70    3.04 
   7  -4   0   24.35    2.69 
  -7  -4   0   29.72    3.34 
   7   4   0   25.61    3.02 
  -7   4   0   30.55    3.16 
   7   4   0   32.93    2.73 
  -7   4   0   26.38    3.28 
   7   4   0   28.94    2.84 
   7   4   0   33.76    2.92 
  -7   4   0   32.51    3.07 
  -8  -4   0    9.96    1.41 
  -8  -4   0   13.45    1.57 
   8  -4   0   11.77    1.56 
   8  -4   0   12.85    1.53 
   8  -4   0   13.09    1.56 
  -8  -4   0   11.56    1.58 
   8  -4   0   11.85    1.49 
  -8  -4   0   12.38    1.61 
   8  -4   0   14.96    1.24 
   8  -4   0   17.36    1.67 
  -8  -4   0   12.49    1.56 
   8  -4   0   12.96    1.24 
  -8   4   0   13.86    1.55 
  -8   4   0   14.34    1.53 
   8   4   0   13.73    1.41 
  -8   4   0   12.44    1.57 
   8   4   0   12.04    1.52 
   8   4   0   14.90    1.47 
   8   4   0   12.68    1.30 
  -9  -4   0   44.46    4.76 
   9  -4   0   43.79    4.78 
   9  -4   0   43.33    4.60 
  -9  -4   0   40.77    5.03 
   9  -4   0   48.41    4.75 
  -9  -4   0   39.80    4.74 
  -9  -4   0   44.03    4.81 
  -9  -4   0   40.19    4.50 
   9  -4   0   44.28    4.13 
   9  -4   0   42.17    4.69 
   9   4   0   37.24    4.57 
   9   4   0   43.45    4.09 
  -9   4   0   52.81    5.02 
   9   4   0   39.10    4.25 
   9   4   0   43.40    4.34 
  -9   4   0   44.52    4.56 
  -9   4   0   49.50    4.78 
  10  -4   0   22.16    2.01 
  10  -4   0   18.23    2.06 
  10  -4   0   18.74    2.10 
  10  -4   0   17.01    2.03 
 -10  -4   0   18.60    2.13 
 -10  -4   0   18.24    2.08 
 -10  -4   0   21.10    2.05 
  10  -4   0   17.13    1.67 
 -10  -4   0   14.16    2.02 
 -10  -4   0   18.36    1.91 
  10   4   0   17.87    2.05 
  10   4   0   19.70    1.71 
 -10   4   0   18.81    1.99 
 -10   4   0   13.44    2.05 
  10   4   0   15.18    1.81 
 -10   4   0   15.40    2.00 
  10   4   0   16.70    1.89 
  11  -4   0    5.76    0.93 
 -11  -4   0    3.52    0.70 
 -11  -4   0    5.05    0.86 
  11  -4   0    4.30    0.78 
 -11  -4   0    3.58    0.66 
  11  -4   0    4.98    0.70 
 -11  -4   0    5.82    0.81 
 -11  -4   0    3.88    0.74 
  11  -4   0    4.91    0.50 
  11  -4   0    4.86    0.86 
  11   4   0    5.46    0.76 
  11   4   0    4.37    0.76 
  11   4   0    5.16    0.70 
 -11   4   0    5.62    0.82 
  11   4   0    6.21    0.97 
 -11   4   0    4.16    0.71 
 -11   4   0    5.98    0.82 
  12  -4   0    0.10    0.11 
  12  -4   0    0.58    0.40 
 -12  -4   0   -0.06    0.14 
 -12  -4   0    0.22    0.28 
 -12  -4   0    0.36    0.23 
  12  -4   0    0.00    0.36 
 -12  -4   0    0.05    0.22 
 -12  -4   0    0.27    0.26 
 -12  -4   0   -0.10    0.21 
  12  -4   0   -0.01    0.21 
  12  -4   0    0.01    0.18 
 -12   4   0    0.32    0.24 
  12   4   0    0.23    0.24 
  12   4   0   -0.19    0.35 
 -12   4   0    0.23    0.20 
  12   4   0    0.38    0.23 
 -12   4   0    0.07    0.29 
  12   4   0   -0.27    0.23 
  13  -4   0   -0.15    0.34 
 -13  -4   0    0.56    0.30 
  13  -4   0    0.45    0.42 
 -13  -4   0   -0.25    0.22 
 -13  -4   0    0.06    0.17 
  13  -4   0    0.24    0.24 
 -13  -4   0   -0.16    0.26 
  13  -4   0    0.35    0.15 
 -13  -4   0    0.23    0.27 
 -13  -4   0    0.25    0.20 
  13   4   0    0.23    0.22 
  13   4   0   -0.12    0.28 
 -13   4   0    0.33    0.24 
  13   4   0    0.20    0.26 
 -13   4   0    0.23    0.34 
  13   4   0    0.82    0.48 
  14  -4   0    2.18    0.59 
 -14  -4   0    2.35    0.62 
 -14  -4   0    3.47    0.53 
 -14  -4   0    4.00    0.51 
 -14  -4   0    3.48    0.63 
  14  -4   0    1.76    0.70 
  14  -4   0    2.45    0.73 
 -14  -4   0    3.88    0.65 
  14   4   0    1.28    0.53 
  14   4   0    3.27    0.53 
 -14   4   0    3.24    0.63 
  14   4   0    2.08    0.78 
  14   4   0    2.18    0.54 
 -14   4   0    2.34    0.59 
  15  -4   0    0.70    0.54 
 -15  -4   0    1.32    0.48 
  15  -4   0    0.49    0.52 
  15  -4   0    1.97    0.52 
 -15  -4   0    0.93    0.41 
 -15  -4   0    1.95    0.36 
 -15  -4   0    1.45    0.44 
 -15   4   0    1.09    0.44 
 -15   4   0    1.05    0.42 
  15   4   0    1.34    0.33 
  15   4   0    1.71    0.51 
  15   4   0    0.28    0.34 
  15   4   0    1.22    0.68 
  16  -4   0    1.07    0.63 
 -16  -4   0    0.76    0.38 
 -16  -4   0    1.43    0.31 
  16  -4   0    0.07    0.30 
 -16  -4   0    0.35    0.40 
  16  -4   0    0.56    0.50 
  16   4   0    0.47    0.35 
  16   4   0    1.20    0.41 
  16   4   0    2.12    0.57 
  16   4   0    1.84    0.76 
 -16   4   0    0.18    0.36 
 -16   4   0    0.46    0.30 
  17  -4   0    3.32    0.97 
 -17  -4   0    3.05    0.72 
  17  -4   0    4.62    0.98 
 -17  -4   0    2.02    0.62 
  17  -4   0    3.36    0.76 
 -17  -4   0    3.78    0.58 
 -17   4   0    3.03    0.69 
  17   4   0    3.49    0.66 
  17   4   0    1.83    0.82 
 -17   4   0    3.78    0.74 
  17   4   0    2.85    0.71 
  17   4   0    4.63    0.75 
  18  -4   0    6.34    1.43 
  18  -4   0    9.13    1.66 
 -18  -4   0   11.25    1.49 
 -18  -4   0    9.78    1.45 
 -18   4   0   11.69    1.42 
 -18   4   0    8.91    1.35 
  18   4   0    8.42    1.30 
  18   4   0    6.74    1.50 
  18   4   0   10.19    1.28 
  18   4   0   10.34    1.43 
 -19  -4   0    8.47    1.56 
 -19  -4   0   11.95    1.64 
  19  -4   0   15.01    2.02 
  19  -4   0   14.60    2.07 
 -19   4   0   11.53    1.59 
  19   4   0   13.80    1.53 
 -19   4   0   12.20    1.58 
  19   4   0    9.04    1.50 
  19   4   0    7.50    1.73 
  19   4   0   12.37    1.62 
  20  -4   0    4.79    1.30 
  20  -4   0    3.28    0.98 
 -20  -4   0    3.08    0.80 
 -20  -4   0    2.73    0.73 
  20   4   0    3.90    0.83 
  20   4   0    5.60    0.99 
 -20   4   0    4.27    0.84 
 -20   4   0    3.50    0.77 
  20   4   0    4.04    1.19 
 -21  -4   0    0.34    0.46 
 -21  -4   0    0.49    0.47 
  21  -4   0    1.67    0.86 
  21  -4   0    0.74    0.64 
  21   4   0    0.88    0.59 
 -21   4   0    0.03    0.40 
 -21   4   0    0.65    0.46 
  21   4   0    0.50    0.76 
 -22  -4   0    1.98    0.71 
  22  -4   0    1.45    0.83 
  22  -4   0    2.64    1.04 
  22  -4   0    0.01    0.48 
  22   4   0    0.61    0.91 
  22   4   0    1.36    0.61 
 -22   4   0    1.50    0.63 
 -22   4   0    0.87    0.53 
  23  -4   0    1.61    0.73 
  23  -4   0    2.05    0.93 
  23  -4   0    2.69    1.15 
 -23  -4   0    3.29    0.87 
  23   4   0    3.17    1.26 
 -23   4   0    2.41    0.68 
  23   4   0    1.42    0.66 
 -23   4   0    2.36    0.69 
  24  -4   0    0.94    0.87 
 -24  -4   0    1.31    0.66 
  24  -4   0    2.55    1.15 
  24  -4   0    1.02    0.63 
 -24   4   0    1.53    0.61 
  24   4   0    1.06    1.14 
   0  -5   0   -0.04    0.15 
   0  -5   0    0.09    0.17 
   0  -5   0   -0.07    0.17 
   0  -5   0    0.04    0.20 
   0  -5   0    0.12    0.17 
   0  -5   0   -0.17    0.15 
   0  -5   0   -0.06    0.17 
   0   5   0    0.12    0.13 
   0   5   0   -0.11    0.12 
   0   5   0    0.07    0.14 
  -1  -5   0    0.37    0.26 
  -1  -5   0    0.36    0.20 
  -1  -5   0    0.33    0.24 
   1  -5   0    0.28    0.23 
  -1  -5   0    0.25    0.22 
  -1  -5   0    0.31    0.20 
  -1  -5   0    0.11    0.18 
   1  -5   0    0.78    0.26 
   1  -5   0    0.50    0.28 
   1  -5   0    0.35    0.21 
   1  -5   0    0.24    0.16 
  -1  -5   0    0.57    0.23 
   1  -5   0    0.10    0.15 
   1  -5   0    0.22    0.18 
   1   5   0    0.34    0.17 
   1   5   0    0.79    0.22 
  -1   5   0    0.46    0.17 
   1   5   0   -0.10    0.13 
  -1   5   0    0.35    0.16 
  -1   5   0    0.12    0.12 
  -2  -5   0   23.47    2.37 
  -2  -5   0   23.40    2.37 
   2  -5   0   22.01    2.34 
   2  -5   0   20.83    2.06 
   2  -5   0   23.82    2.44 
  -2  -5   0   21.96    2.12 
   2  -5   0   24.84    2.37 
   2  -5   0   20.61    2.28 
  -2  -5   0   18.58    2.43 
   2  -5   0   20.82    2.32 
  -2  -5   0   20.54    2.40 
  -2  -5   0   18.67    2.20 
   2  -5   0   17.58    2.36 
   2   5   0   20.26    2.08 
  -2   5   0   21.65    2.29 
   2   5   0   20.73    2.01 
  -2   5   0   18.20    2.01 
  -2   5   0   22.03    2.01 
   2   5   0   19.07    2.06 
   2   5   0   19.71    2.18 
  -3  -5   0   14.15    1.88 
   3  -5   0   17.64    1.67 
  -3  -5   0   15.56    1.72 
   3  -5   0   14.09    1.87 
   3  -5   0   21.49    1.99 
  -3  -5   0   16.59    1.77 
   3  -5   0   14.92    1.93 
   3  -5   0   16.01    1.87 
   3  -5   0   17.51    1.88 
  -3  -5   0   16.98    1.96 
  -3  -5   0   18.14    1.94 
   3  -5   0   17.13    1.66 
  -3   5   0   16.59    1.60 
  -3   5   0   17.71    1.89 
   3   5   0   16.64    1.77 
   3   5   0   17.57    1.63 
   3   5   0   17.21    1.70 
  -3   5   0   13.79    1.85 
   3   5   0   16.32    1.68 
   3   5   0   14.61    1.68 
  -4  -5   0    3.51    0.59 
   4  -5   0    3.87    0.61 
  -4  -5   0    2.52    0.57 
   4  -5   0    4.65    0.47 
  -4  -5   0    3.30    0.51 
   4  -5   0    3.61    0.68 
   4  -5   0    6.14    0.62 
  -4  -5   0    3.57    0.67 
   4  -5   0    3.21    0.66 
  -4  -5   0    3.02    0.60 
   4  -5   0    3.81    0.49 
  -4  -5   0    5.13    0.77 
   4  -5   0    3.55    0.49 
  -4   5   0    4.21    0.48 
   4   5   0    3.92    0.52 
  -4   5   0    3.90    0.69 
   4   5   0    5.24    0.66 
   4   5   0    2.90    0.54 
  -4   5   0    4.51    0.63 
  -4   5   0    3.66    0.49 
   4   5   0    3.95    0.52 
   4   5   0    3.23    0.54 
   5  -5   0    1.31    0.21 
   5  -5   0    1.20    0.24 
  -5  -5   0    1.12    0.33 
   5  -5   0    0.79    0.34 
   5  -5   0    1.22    0.38 
   5  -5   0    0.69    0.27 
  -5  -5   0    1.20    0.33 
   5  -5   0    1.57    0.29 
  -5  -5   0    1.21    0.39 
  -5  -5   0    0.55    0.33 
   5   5   0    1.27    0.32 
   5   5   0    1.50    0.32 
  -5   5   0    1.50    0.45 
   5   5   0    1.03    0.26 
   5   5   0    1.24    0.29 
   5   5   0    1.68    0.37 
  -5   5   0    0.93    0.28 
  -5   5   0    1.38    0.33 
   6  -5   0   29.17    3.51 
   6  -5   0   30.61    3.01 
  -6  -5   0   31.15    3.52 
   6  -5   0   31.82    3.28 
   6  -5   0   34.99    2.98 
   6  -5   0   34.36    3.47 
  -6  -5   0   33.13    3.67 
   6  -5   0   28.71    2.98 
   6  -5   0   37.27    3.48 
  -6  -5   0   32.53    3.54 
  -6  -5   0   29.68    3.49 
  -6   5   0   30.05    3.35 
   6   5   0   33.31    3.30 
   6   5   0   25.25    2.97 
   6   5   0   31.44    3.12 
  -6   5   0   30.59    3.46 
   6   5   0   35.03    3.27 
   6   5   0   29.92    3.15 
  -6   5   0   31.03    3.64 
  -7  -5   0    5.69    1.01 
  -7  -5   0    7.32    1.12 
  -7  -5   0    8.78    1.09 
   7  -5   0    7.14    1.08 
  -7  -5   0    7.24    1.08 
  -7  -5   0    8.97    0.91 
   7  -5   0    6.98    0.96 
   7  -5   0    7.96    1.13 
   7  -5   0    7.39    0.76 
   7  -5   0    6.86    0.96 
  -7   5   0    7.42    0.96 
   7   5   0    7.49    0.81 
   7   5   0    5.86    0.96 
  -7   5   0    6.45    0.99 
   7   5   0    6.67    0.93 
   7   5   0    7.56    0.98 
  -7   5   0    8.80    1.14 
   7   5   0    7.75    0.94 
   8  -5   0    7.52    1.00 
  -8  -5   0    5.45    1.01 
   8  -5   0    7.46    0.89 
   8  -5   0    5.82    1.01 
  -8  -5   0    6.12    1.01 
   8  -5   0    7.31    0.70 
  -8  -5   0    5.63    0.98 
  -8  -5   0    8.20    0.88 
   8  -5   0    6.36    0.68 
  -8  -5   0    6.35    0.99 
   8  -5   0    6.60    1.07 
  -8   5   0    8.10    1.05 
   8   5   0    6.97    0.77 
   8   5   0    7.40    0.97 
  -8   5   0    7.11    0.92 
   8   5   0    7.62    1.00 
   8   5   0    8.27    0.96 
   8   5   0    6.86    0.90 
  -8   5   0    6.01    0.95 
   9  -5   0    2.41    0.67 
  -9  -5   0    3.38    0.72 
  -9  -5   0    2.58    0.58 
   9  -5   0    3.12    0.60 
   9  -5   0    3.86    0.57 
   9  -5   0    3.81    0.68 
  -9  -5   0    3.31    0.61 
  -9  -5   0    2.87    0.52 
   9  -5   0    2.75    0.33 
  -9  -5   0    3.35    0.62 
   9  -5   0    3.21    0.33 
   9   5   0    4.33    0.71 
   9   5   0    2.71    0.45 
   9   5   0    3.94    0.58 
  -9   5   0    2.49    0.56 
   9   5   0    3.51    0.57 
  -9   5   0    3.63    0.57 
   9   5   0    4.20    0.65 
  -9   5   0    3.94    0.68 
 -10  -5   0   17.32    2.08 
 -10  -5   0   18.14    2.07 
 -10  -5   0   20.37    2.04 
  10  -5   0   16.32    1.96 
  10  -5   0   17.20    2.06 
 -10  -5   0   16.35    1.84 
  10  -5   0   15.62    1.91 
  10  -5   0   17.41    2.04 
 -10  -5   0   18.18    2.03 
  10   5   0   17.72    1.83 
  10   5   0   14.21    1.93 
  10   5   0   16.65    1.79 
  10   5   0   19.31    1.88 
 -10   5   0   15.67    1.97 
 -10   5   0   13.76    1.99 
 -10   5   0   18.50    1.95 
  11  -5   0    4.82    0.96 
 -11  -5   0    6.28    0.75 
  11  -5   0    3.63    0.78 
 -11  -5   0    4.10    0.77 
 -11  -5   0    4.42    0.90 
  11  -5   0    4.34    0.84 
 -11  -5   0    5.11    0.80 
  11  -5   0    4.23    0.67 
 -11  -5   0    2.62    0.66 
 -11   5   0    5.18    0.83 
  11   5   0    5.92    0.76 
  11   5   0    5.68    0.83 
  11   5   0    4.00    0.85 
  11   5   0    4.44    0.71 
 -11   5   0    3.71    0.74 
 -12  -5   0    3.15    0.54 
 -12  -5   0    1.83    0.51 
 -12  -5   0    1.80    0.51 
 -12  -5   0    3.69    0.74 
  12  -5   0    2.46    0.58 
  12  -5   0    1.98    0.64 
 -12  -5   0    1.69    0.52 
  12  -5   0    2.67    0.68 
  12   5   0    1.46    0.56 
 -12   5   0    2.63    0.56 
 -12   5   0    2.56    0.60 
  12   5   0    2.22    0.56 
  12   5   0    2.79    0.52 
  12   5   0    2.64    0.56 
 -13  -5   0   -0.07    0.23 
  13  -5   0    0.30    0.33 
 -13  -5   0   -0.28    0.27 
  13  -5   0   -0.06    0.37 
 -13  -5   0   -0.15    0.25 
  13  -5   0    0.00    0.42 
 -13  -5   0    0.03    0.25 
 -13  -5   0   -0.02    0.25 
 -13   5   0   -0.03    0.33 
 -13   5   0    0.03    0.27 
  13   5   0    0.36    0.46 
  13   5   0   -0.28    0.29 
  13   5   0   -0.65    0.27 
  13   5   0   -0.11    0.24 
 -14  -5   0   -0.01    0.26 
 -14  -5   0    0.17    0.35 
 -14  -5   0    0.29    0.30 
  14  -5   0    0.56    0.49 
  14  -5   0    0.17    0.34 
  14  -5   0    0.08    0.36 
 -14   5   0    0.07    0.32 
  14   5   0   -0.33    0.31 
  14   5   0    0.10    0.51 
  14   5   0    0.27    0.24 
 -14   5   0    0.06    0.35 
  14   5   0   -0.02    0.28 
 -15  -5   0    1.30    0.51 
 -15  -5   0    1.73    0.51 
  15  -5   0    2.06    0.58 
  15  -5   0    0.71    0.56 
  15  -5   0    1.31    0.66 
 -15  -5   0    1.27    0.46 
 -15   5   0    1.40    0.48 
 -15   5   0    1.48    0.53 
  15   5   0    1.88    0.43 
  15   5   0    1.52    0.67 
  15   5   0    1.13    0.44 
  15   5   0    2.15    0.62 
  16  -5   0    9.89    1.84 
 -16  -5   0   14.59    1.87 
 -16  -5   0   12.12    1.73 
  16  -5   0   12.75    1.84 
 -16  -5   0   10.81    1.77 
  16  -5   0   13.15    1.91 
  16   5   0   15.14    1.80 
 -16   5   0   12.64    1.73 
  16   5   0   10.99    1.90 
  16   5   0   15.67    1.52 
  16   5   0   12.06    1.58 
 -16   5   0   14.11    1.69 
 -17  -5   0   13.39    1.71 
 -17  -5   0    9.43    1.63 
  17  -5   0    8.69    1.72 
  17  -5   0   12.15    1.73 
 -17  -5   0   11.33    1.60 
  17  -5   0   11.04    1.80 
 -17   5   0   12.38    1.60 
  17   5   0   14.10    1.58 
  17   5   0   11.28    1.81 
  17   5   0   10.31    1.53 
 -17   5   0   12.18    1.63 
 -18  -5   0    7.74    1.36 
  18  -5   0   11.20    1.76 
 -18  -5   0   10.45    1.45 
  18  -5   0    7.88    1.53 
  18  -5   0    9.16    1.46 
  18   5   0    9.63    1.38 
 -18   5   0    8.30    1.38 
 -18   5   0    8.17    1.30 
  18   5   0    8.05    1.56 
  19  -5   0    0.20    0.47 
  19  -5   0    0.06    0.71 
 -19  -5   0    0.78    0.49 
 -19  -5   0    0.51    0.46 
  19  -5   0    1.19    0.68 
  19   5   0    0.57    0.49 
 -19   5   0    0.74    0.49 
  19   5   0    0.85    0.83 
 -19   5   0    0.89    0.48 
  20  -5   0   -0.21    0.60 
 -20  -5   0    0.04    0.39 
  20  -5   0    0.22    0.54 
 -20  -5   0   -0.45    0.35 
  20  -5   0   -0.08    0.41 
 -20   5   0   -0.29    0.41 
  20   5   0   -0.15    0.69 
  20   5   0    0.00    0.40 
 -20   5   0    0.04    0.36 
  21  -5   0    1.38    0.76 
  21  -5   0    2.27    0.93 
 -21  -5   0    0.72    0.58 
  21  -5   0    0.83    0.55 
 -21  -5   0    1.08    0.52 
 -21   5   0    0.50    0.53 
 -21   5   0    1.18    0.55 
  21   5   0    0.59    0.80 
  21   5   0    1.38    0.61 
 -22  -5   0    2.01    0.79 
  22  -5   0    3.19    1.07 
 -22  -5   0    3.44    0.83 
  22  -5   0    4.63    1.29 
  22  -5   0    3.50    0.93 
  22   5   0    3.26    0.92 
  22   5   0    3.77    1.23 
 -22   5   0    3.19    0.78 
 -22   5   0    3.75    0.91 
  23  -5   0    7.07    1.57 
  23  -5   0    5.88    1.22 
 -23  -5   0    5.31    1.12 
  23  -5   0    2.22    1.14 
  23   5   0    5.46    1.46 
 -23   5   0    4.24    1.01 
 -23   5   0    4.61    0.99 
  23   5   0    5.59    1.12 
   0  -6   0    5.97    0.80 
   0  -6   0    5.53    0.79 
   0  -6   0    4.34    0.78 
   0  -6   0    4.83    0.73 
   0  -6   0    5.81    0.92 
   0  -6   0    4.03    0.74 
   0  -6   0    4.51    0.81 
   0   6   0    4.47    0.64 
   0   6   0    4.99    0.73 
   0   6   0    6.97    0.94 
   0   6   0    5.31    0.64 
   0   6   0    4.94    0.65 
   0   6   0    6.83    0.80 
  -1  -6   0    3.89    0.75 
   1  -6   0    3.89    0.65 
   1  -6   0    4.20    0.74 
   1  -6   0    3.87    0.59 
   1  -6   0    2.97    0.58 
  -1  -6   0    4.61    0.67 
   1  -6   0    3.49    0.66 
   1  -6   0    3.61    0.64 
   1  -6   0    3.12    0.59 
  -1  -6   0    3.05    0.65 
  -1  -6   0    3.59    0.61 
  -1  -6   0    3.31    0.65 
  -1  -6   0    3.53    0.61 
  -1  -6   0    4.55    0.63 
   1   6   0    4.12    0.56 
  -1   6   0    4.30    0.61 
   1   6   0    4.30    0.55 
  -1   6   0    4.06    0.50 
   1   6   0    3.97    0.69 
   1   6   0    2.75    0.49 
   1   6   0    3.56    0.58 
  -1   6   0    3.18    0.49 
  -1   6   0    3.98    0.61 
   1   6   0    4.05    0.62 
  -1   6   0    2.78    0.64 
   2  -6   0    1.55    0.40 
  -2  -6   0    1.90    0.50 
  -2  -6   0    2.34    0.41 
   2  -6   0    1.58    0.46 
  -2  -6   0    2.66    0.58 
   2  -6   0    2.32    0.50 
   2  -6   0    1.61    0.39 
  -2  -6   0    1.62    0.42 
   2  -6   0    2.03    0.41 
   2  -6   0    1.98    0.52 
  -2  -6   0    2.66    0.56 
   2  -6   0    2.65    0.45 
  -2  -6   0    1.17    0.38 
   2   6   0    2.34    0.38 
  -2   6   0    1.84    0.31 
   2   6   0    1.94    0.37 
  -2   6   0    1.32    0.32 
  -2   6   0    2.27    0.53 
  -2   6   0    1.61    0.39 
   2   6   0    1.76    0.41 
   2   6   0    2.03    0.39 
   2   6   0    1.89    0.39 
  -2   6   0    1.63    0.38 
  -3  -6   0    3.45    0.70 
   3  -6   0    2.37    0.50 
   3  -6   0    4.74    0.64 
  -3  -6   0    3.81    0.71 
   3  -6   0    4.12    0.70 
   3  -6   0    3.08    0.59 
  -3  -6   0    3.58    0.63 
  -3  -6   0    5.14    0.60 
   3  -6   0    2.88    0.69 
   3  -6   0    3.32    0.61 
   3  -6   0    2.78    0.64 
  -3  -6   0    3.73    0.62 
  -3   6   0    3.88    0.52 
   3   6   0    3.82    0.61 
  -3   6   0    4.12    0.65 
   3   6   0    3.46    0.55 
   3   6   0    3.89    0.57 
  -3   6   0    4.62    0.61 
   3   6   0    3.33    0.52 
  -3   6   0    3.36    0.71 
  -4  -6   0    5.25    0.83 
   4  -6   0    4.13    0.77 
  -4  -6   0    3.33    0.65 
  -4  -6   0    5.63    0.59 
   4  -6   0    4.54    0.60 
   4  -6   0    5.40    0.77 
   4  -6   0    4.93    0.79 
   4  -6   0    3.83    0.66 
   4  -6   0    4.18    0.67 
   4  -6   0    3.34    0.46 
  -4  -6   0    3.37    0.74 
  -4  -6   0    6.76    0.81 
  -4   6   0    3.81    0.66 
  -4   6   0    4.72    0.65 
   4   6   0    4.12    0.57 
   4   6   0    4.70    0.69 
  -4   6   0    6.09    0.89 
   4   6   0    4.41    0.65 
   4   6   0    4.33    0.63 
   4   6   0    3.96    0.50 
   5  -6   0    7.14    1.14 
  -5  -6   0    8.21    1.21 
  -5  -6   0    9.00    1.17 
  -5  -6   0    6.47    1.14 
  -5  -6   0    8.79    0.92 
  -5  -6   0    5.17    1.04 
   5  -6   0    8.94    1.24 
   5  -6   0    7.91    1.09 
   5  -6   0    8.19    1.13 
   5  -6   0    7.06    0.83 
   5  -6   0    7.78    0.88 
   5  -6   0   10.61    1.08 
   5  -6   0    7.35    0.87 
  -5   6   0    7.47    0.93 
  -5   6   0    8.51    1.19 
   5   6   0    6.61    0.98 
   5   6   0    7.10    0.98 
   5   6   0    8.30    1.05 
  -5   6   0    8.94    1.06 
   5   6   0    9.18    0.92 
   5   6   0    8.23    0.88 
   6  -6   0    4.40    0.76 
   6  -6   0    3.81    0.60 
  -6  -6   0    3.94    0.72 
   6  -6   0    3.59    0.47 
   6  -6   0    3.19    0.68 
   6  -6   0    3.66    0.58 
  -6  -6   0    3.84    0.62 
  -6  -6   0    1.46    0.56 
  -6  -6   0    2.60    0.59 
   6  -6   0    2.16    0.45 
   6   6   0    2.47    0.52 
  -6   6   0    3.66    0.53 
   6   6   0    3.00    0.56 
   6   6   0    2.50    0.52 
  -6   6   0    3.48    0.58 
  -6   6   0    4.36    0.73 
   6   6   0    2.75    0.47 
  -6   6   0    2.85    0.56 
   6   6   0    3.41    0.55 
  -7  -6   0   70.17    6.80 
  -7  -6   0   57.56    6.76 
   7  -6   0   56.63    6.30 
   7  -6   0   60.33    6.56 
   7  -6   0   56.61    6.75 
   7  -6   0   71.76    6.73 
  -7  -6   0   51.54    6.65 
  -7  -6   0   74.88    6.40 
   7  -6   0   62.33    5.87 
   7   6   0   61.38    6.05 
   7   6   0   66.62    6.29 
   7   6   0   61.17    5.80 
  -7   6   0   59.15    7.06 
   7   6   0   59.52    6.33 
  -7   6   0   63.07    6.21 
  -7   6   0   66.48    6.45 
   7   6   0   58.25    5.98 
  -7   6   0   62.19    6.70 
   8  -6   0    0.02    0.29 
  -8  -6   0    0.09    0.35 
  -8  -6   0   -0.24    0.22 
  -8  -6   0   -0.23    0.23 
   8  -6   0    0.21    0.34 
  -8  -6   0   -0.02    0.27 
   8  -6   0    0.08    0.14 
   8  -6   0    0.22    0.23 
  -8  -6   0   -0.12    0.23 
   8  -6   0    0.34    0.26 
   8   6   0   -0.15    0.23 
   8   6   0    0.09    0.25 
   8   6   0    0.52    0.34 
   8   6   0    0.09    0.29 
   8   6   0   -0.01    0.18 
  -8   6   0    0.17    0.34 
  -8   6   0    0.16    0.18 
  -8   6   0    0.09    0.22 
  -8   6   0   -0.12    0.21 
   9  -6   0    0.25    0.29 
  -9  -6   0   -0.02    0.34 
   9  -6   0    0.21    0.09 
  -9  -6   0    0.08    0.28 
  -9  -6   0    0.01    0.28 
  -9  -6   0   -0.12    0.22 
   9  -6   0   -0.42    0.22 
   9  -6   0   -0.73    0.23 
  -9  -6   0   -0.07    0.19 
  -9   6   0   -0.11    0.17 
  -9   6   0   -0.13    0.16 
   9   6   0    0.04    0.33 
   9   6   0    0.00    0.26 
   9   6   0   -0.10    0.22 
  -9   6   0   -0.04    0.36 
   9   6   0   -0.04    0.27 
 -10  -6   0    0.77    0.35 
  10  -6   0    1.30    0.41 
 -10  -6   0    0.40    0.35 
 -10  -6   0    0.53    0.31 
  10  -6   0    0.49    0.39 
 -10  -6   0    0.75    0.38 
  10  -6   0    1.12    0.53 
 -10  -6   0    0.54    0.41 
  10   6   0    0.97    0.39 
  10   6   0    0.57    0.33 
  10   6   0    0.80    0.41 
 -10   6   0    0.35    0.22 
 -10   6   0    0.76    0.39 
 -10   6   0   -0.03    0.26 
  10   6   0    0.57    0.34 
 -11  -6   0    1.36    0.55 
 -11  -6   0    1.90    0.47 
 -11  -6   0    1.64    0.51 
  11  -6   0    1.46    0.62 
  11  -6   0    2.44    0.62 
 -11  -6   0    2.65    0.59 
 -11  -6   0    2.08    0.54 
  11  -6   0    2.08    0.56 
  11   6   0    1.69    0.52 
  11   6   0    1.81    0.48 
 -11   6   0    2.40    0.53 
 -11   6   0    2.11    0.60 
  11   6   0    2.64    0.51 
  11   6   0    2.48    0.65 
  12  -6   0    1.98    0.57 
  12  -6   0    1.88    0.57 
 -12  -6   0    1.29    0.47 
 -12  -6   0    1.51    0.47 
 -12  -6   0    0.77    0.42 
 -12  -6   0    2.05    0.46 
 -12  -6   0    0.88    0.50 
  12  -6   0    1.85    0.65 
  12   6   0    1.11    0.44 
  12   6   0    2.21    0.47 
 -12   6   0    2.25    0.55 
 -12   6   0    1.36    0.50 
  12   6   0    2.39    0.62 
  12   6   0    1.55    0.55 
 -13  -6   0    9.99    1.33 
 -13  -6   0    7.18    1.31 
  13  -6   0   10.17    1.41 
  13  -6   0    8.22    1.43 
  13  -6   0    8.70    1.31 
 -13  -6   0    7.15    1.19 
 -13   6   0    6.79    1.19 
  13   6   0    6.20    1.23 
  13   6   0    8.94    1.24 
 -13   6   0    8.26    1.26 
  13   6   0    8.93    1.16 
  13   6   0    7.70    1.11 
  14  -6   0   12.19    1.90 
 -14  -6   0   17.02    1.88 
 -14  -6   0   13.12    1.74 
 -14  -6   0   14.38    1.96 
  14  -6   0   14.96    2.13 
  14  -6   0   15.70    1.97 
 -14   6   0   14.63    1.91 
  14   6   0   14.75    1.82 
 -14   6   0   13.74    1.81 
  14   6   0   13.14    1.68 
  14   6   0   12.44    1.58 
  14   6   0   10.48    1.82 
 -15  -6   0   -0.02    0.33 
  15  -6   0    0.39    0.55 
 -15  -6   0   -0.10    0.32 
  15  -6   0    0.30    0.48 
 -15  -6   0    0.05    0.39 
  15  -6   0   -0.48    0.34 
  15   6   0    0.19    0.39 
 -15   6   0   -0.04    0.37 
 -15   6   0   -0.32    0.26 
  15   6   0   -0.29    0.46 
  15   6   0    0.06    0.28 
  15   6   0   -0.11    0.36 
  16  -6   0    0.44    0.47 
 -16  -6   0    2.45    0.69 
 -16  -6   0    2.21    0.62 
  16  -6   0    2.03    0.80 
  16  -6   0    2.09    0.81 
 -16  -6   0    4.23    0.76 
  16   6   0    2.63    0.53 
  16   6   0    2.18    0.64 
  16   6   0    0.27    0.64 
 -16   6   0    1.86    0.62 
 -16   6   0    1.93    0.63 
 -17  -6   0   -0.10    0.36 
  17  -6   0    0.20    0.47 
 -17  -6   0    0.27    0.40 
 -17  -6   0    0.39    0.43 
  17  -6   0    0.12    0.45 
  17  -6   0   -0.75    0.44 
  17   6   0   -0.22    0.43 
  17   6   0   -0.12    0.26 
 -17   6   0    0.33    0.43 
 -17   6   0   -0.31    0.40 
  17   6   0   -0.74    0.54 
 -18  -6   0   -0.12    0.38 
 -18  -6   0    0.04    0.38 
  18  -6   0   -0.22    0.54 
  18  -6   0    0.37    0.47 
  18  -6   0   -0.48    0.56 
 -18  -6   0    0.00    0.44 
  18   6   0   -0.09    0.68 
 -18   6   0   -0.22    0.34 
 -18   6   0   -0.62    0.29 
  18   6   0   -0.23    0.41 
  19  -6   0    8.08    1.45 
  19  -6   0    8.27    1.49 
  19  -6   0    9.19    1.69 
 -19  -6   0    7.83    1.33 
 -19  -6   0    6.10    1.24 
 -19   6   0    7.86    1.28 
  19   6   0    7.37    1.51 
  19   6   0    5.60    1.18 
 -19   6   0    8.75    1.29 
 -20  -6   0    0.89    0.54 
  20  -6   0    1.04    0.76 
 -20  -6   0    0.15    0.47 
  20  -6   0    1.57    0.69 
  20  -6   0   -0.26    0.62 
 -20   6   0    0.21    0.49 
 -20   6   0    0.07    0.48 
  20   6   0    0.27    0.50 
  20   6   0   -0.55    0.72 
  21  -6   0    1.13    0.68 
  21  -6   0    0.44    0.81 
 -21  -6   0    1.31    0.58 
  21  -6   0    0.68    0.84 
 -21  -6   0    0.43    0.57 
  21   6   0   -0.39    0.55 
 -21   6   0    0.08    0.45 
 -21   6   0    0.01    0.45 
  21   6   0    1.16    0.94 
 -22  -6   0    0.06    0.52 
  22  -6   0   -0.93    0.78 
 -22  -6   0    0.14    0.48 
  22  -6   0    0.09    0.97 
  22  -6   0    0.58    0.62 
  22   6   0    0.40    0.62 
  22   6   0    0.32    0.86 
 -22   6   0   -0.16    0.41 
   0  -7   0   -0.08    0.25 
   0  -7   0   -0.26    0.21 
   0  -7   0    0.08    0.26 
   0  -7   0    0.32    0.34 
   0  -7   0    0.03    0.24 
   0   7   0    0.12    0.18 
   0   7   0   -0.11    0.29 
   0   7   0    0.19    0.22 
   0   7   0   -0.14    0.19 
   0   7   0    0.21    0.19 
  -1  -7   0    0.28    0.26 
   1  -7   0    0.54    0.32 
  -1  -7   0    0.31    0.35 
  -1  -7   0    0.27    0.27 
  -1  -7   0    0.08    0.31 
   1  -7   0   -0.15    0.26 
   1  -7   0    0.20    0.29 
   1  -7   0   -0.12    0.30 
  -1  -7   0   -0.08    0.22 
   1  -7   0    0.17    0.24 
   1   7   0    0.85    0.25 
   1   7   0    0.70    0.27 
  -1   7   0   -0.09    0.32 
   1   7   0   -0.03    0.26 
  -1   7   0    0.43    0.20 
   1   7   0    0.72    0.25 
  -1   7   0    0.24    0.24 
   1   7   0    0.43    0.38 
  -1   7   0   -0.03    0.20 
   2  -7   0   15.76    2.16 
  -2  -7   0   18.85    2.31 
   2  -7   0   16.39    2.19 
   2  -7   0   17.46    2.14 
   2  -7   0   20.16    2.32 
  -2  -7   0   18.10    2.28 
  -2  -7   0   17.27    2.22 
   2  -7   0   18.35    1.96 
  -2  -7   0   17.65    2.06 
  -2  -7   0   20.24    2.24 
   2   7   0   20.06    1.95 
   2   7   0   23.43    2.21 
  -2   7   0   22.14    2.19 
   2   7   0   19.21    1.89 
  -2   7   0   19.29    1.87 
   2   7   0   18.06    2.05 
  -2   7   0   20.56    2.06 
   2   7   0   16.87    2.12 
  -2   7   0   20.95    2.20 
   2   7   0   18.93    1.94 
  -3  -7   0   -0.55    0.26 
   3  -7   0   -0.23    0.17 
   3  -7   0    0.98    0.42 
   3  -7   0   -0.09    0.26 
   3  -7   0    0.06    0.29 
  -3  -7   0    0.09    0.22 
  -3  -7   0   -0.14    0.19 
   3  -7   0   -0.27    0.20 
   3  -7   0   -0.05    0.22 
  -3  -7   0   -0.17    0.29 
  -3  -7   0   -0.29    0.22 
   3   7   0    0.51    0.29 
   3   7   0   -0.04    0.21 
  -3   7   0   -0.09    0.23 
   3   7   0    0.11    0.23 
  -3   7   0   -0.38    0.31 
   3   7   0    0.07    0.19 
   3   7   0    0.10    0.22 
  -3   7   0   -0.28    0.20 
  -4  -7   0   22.89    2.78 
  -4  -7   0   24.62    2.70 
  -4  -7   0   25.06    2.74 
  -4  -7   0   29.17    2.50 
  -4  -7   0   17.81    2.70 
   4  -7   0   18.22    2.61 
   4  -7   0   20.79    2.32 
   4  -7   0   25.36    2.66 
   4  -7   0   22.33    2.76 
   4  -7   0   22.33    2.74 
   4  -7   0   21.35    2.65 
  -4   7   0   22.75    2.60 
   4   7   0   21.07    2.48 
  -4   7   0   25.68    2.65 
  -4   7   0   23.91    2.47 
   4   7   0   20.14    2.36 
   4   7   0   28.38    2.61 
   4   7   0   25.18    2.30 
   4   7   0   21.77    2.36 
   5  -7   0   -0.19    0.22 
   5  -7   0    0.45    0.27 
  -5  -7   0    0.14    0.26 
   5  -7   0   -0.10    0.24 
   5  -7   0    0.15    0.22 
  -5  -7   0   -0.10    0.31 
   5  -7   0   -0.22    0.26 
  -5  -7   0    0.15    0.32 
  -5  -7   0   -0.21    0.15 
   5  -7   0   -0.14    0.31 
  -5  -7   0   -0.17    0.21 
  -5   7   0   -0.24    0.20 
   5   7   0   -0.31    0.19 
   5   7   0   -0.19    0.18 
   5   7   0    0.28    0.28 
  -5   7   0   -0.31    0.26 
   5   7   0   -0.09    0.18 
   5   7   0    0.16    0.26 
  -5   7   0    0.04    0.22 
  -6  -7   0    2.11    0.69 
  -6  -7   0    3.90    0.78 
   6  -7   0    4.57    0.85 
   6  -7   0    3.19    0.59 
   6  -7   0    3.10    0.66 
   6  -7   0    3.56    0.80 
  -6  -7   0    4.10    0.69 
  -6  -7   0    2.99    0.65 
  -6   7   0    2.47    0.58 
  -6   7   0    3.51    0.74 
   6   7   0    2.20    0.49 
   6   7   0    3.05    0.58 
  -6   7   0    3.93    0.60 
   6   7   0    3.63    0.65 
   6   7   0    3.69    0.62 
  -7  -7   0    0.11    0.29 
  -7  -7   0   -0.27    0.24 
   7  -7   0   -0.03    0.23 
  -7  -7   0    0.20    0.40 
   7  -7   0    0.00    0.34 
  -7  -7   0    0.61    0.43 
   7  -7   0    0.73    0.42 
   7   7   0   -0.11    0.28 
   7   7   0   -0.09    0.24 
  -7   7   0    0.21    0.36 
  -7   7   0    0.03    0.27 
   7   7   0   -0.01    0.25 
   7   7   0    0.48    0.32 
  -7   7   0    0.13    0.20 
  -8  -7   0   16.10    2.62 
  -8  -7   0   24.09    2.61 
   8  -7   0   22.20    2.62 
  -8  -7   0   24.10    2.38 
  -8  -7   0   19.19    2.53 
   8  -7   0   18.14    2.50 
  -8  -7   0   26.32    2.68 
   8  -7   0   27.02    2.61 
   8   7   0   22.49    2.42 
  -8   7   0   21.25    2.50 
  -8   7   0   19.25    2.45 
  -8   7   0   18.19    2.24 
   8   7   0   18.98    2.31 
   8   7   0   21.31    2.26 
   8   7   0   20.37    2.28 
  -9  -7   0   12.60    1.96 
  -9  -7   0   12.55    1.64 
   9  -7   0   14.38    2.01 
  -9  -7   0    9.82    1.80 
  -9  -7   0   15.35    1.86 
   9  -7   0   12.34    1.94 
  -9  -7   0   17.24    1.89 
   9   7   0   13.33    1.71 
   9   7   0   17.58    1.70 
   9   7   0   14.39    1.61 
  -9   7   0   14.60    1.87 
  -9   7   0   13.08    1.75 
  -9   7   0   14.25    1.56 
   9   7   0   15.40    1.67 
 -10  -7   0   16.22    1.93 
 -10  -7   0   13.25    2.04 
 -10  -7   0   15.92    1.92 
  10  -7   0   14.50    2.05 
  10  -7   0   16.81    2.15 
 -10  -7   0   11.64    1.68 
 -10  -7   0   15.46    1.90 
 -10   7   0   12.21    1.85 
  10   7   0   15.39    1.72 
  10   7   0   13.46    1.77 
 -10   7   0   14.04    1.81 
  10   7   0   17.47    1.73 
 -10   7   0   15.64    1.61 
 -11  -7   0    0.34    0.33 
  11  -7   0    0.41    0.53 
 -11  -7   0    0.20    0.32 
 -11  -7   0    0.39    0.36 
 -11  -7   0    0.86    0.53 
 -11  -7   0    0.70    0.38 
  11  -7   0    0.00    0.41 
  11   7   0    0.12    0.27 
  11   7   0   -0.09    0.28 
 -11   7   0    0.28    0.43 
 -11   7   0    0.68    0.35 
  11   7   0   -0.04    0.32 
 -12  -7   0    0.23    0.49 
  12  -7   0    0.06    0.49 
  12  -7   0    0.30    0.40 
  12  -7   0   -0.20    0.34 
 -12  -7   0    0.00    0.30 
 -12  -7   0   -0.10    0.31 
 -12  -7   0    0.12    0.37 
 -12   7   0   -0.18    0.38 
  12   7   0   -0.33    0.29 
  12   7   0   -0.13    0.23 
 -12   7   0    0.02    0.31 
  12   7   0   -0.16    0.32 
 -13  -7   0    1.15    0.50 
 -13  -7   0    1.52    0.51 
  13  -7   0    1.04    0.68 
  13  -7   0    1.66    0.60 
 -13  -7   0    2.98    0.79 
  13   7   0    1.65    0.58 
 -13   7   0    2.16    0.57 
 -13   7   0    1.87    0.63 
  13   7   0    1.11    0.47 
 -14  -7   0    2.39    0.62 
  14  -7   0    1.70    0.66 
  14  -7   0    2.99    0.85 
 -14  -7   0    0.91    0.49 
 -14  -7   0    1.56    0.65 
 -14   7   0    1.01    0.62 
  14   7   0    1.50    0.46 
  14   7   0    2.42    0.66 
 -14   7   0    1.34    0.51 
  15  -7   0   -1.04    0.40 
 -15  -7   0   -0.46    0.43 
 -15  -7   0   -0.41    0.34 
 -15  -7   0   -0.21    0.34 
  15  -7   0    0.02    0.39 
 -15   7   0   -0.12    0.45 
  15   7   0    0.06    0.36 
 -15   7   0    0.45    0.43 
  15   7   0    0.26    0.30 
  16  -7   0    0.92    0.76 
 -16  -7   0    1.29    0.66 
 -16  -7   0    3.02    0.71 
  16  -7   0    1.78    0.68 
 -16  -7   0    2.17    0.61 
 -16   7   0    1.09    0.60 
  16   7   0    1.60    0.60 
  16   7   0    4.05    0.67 
 -16   7   0    2.29    0.59 
 -17  -7   0    0.15    0.47 
 -17  -7   0   -0.21    0.37 
  17  -7   0   -0.32    0.44 
  17  -7   0    0.50    0.77 
 -17  -7   0    0.51    0.44 
  17   7   0    0.49    0.52 
  17   7   0    0.07    0.32 
 -17   7   0    0.01    0.43 
 -17   7   0    0.27    0.44 
 -18  -7   0    4.60    1.04 
  18  -7   0    4.78    1.30 
 -18  -7   0    4.64    1.11 
 -18  -7   0    5.62    1.07 
  18  -7   0    6.38    1.27 
  18   7   0    4.75    1.04 
 -18   7   0    6.17    1.08 
  18   7   0    5.31    0.89 
 -18   7   0    5.63    1.08 
 -19  -7   0    0.24    0.46 
 -19  -7   0    1.12    0.62 
 -19  -7   0   -0.15    0.44 
  19  -7   0    0.81    0.65 
  19  -7   0    0.35    0.73 
 -19   7   0    0.26    0.52 
  19   7   0    0.43    0.59 
 -19   7   0    0.61    0.48 
 -20  -7   0    0.72    0.56 
  20  -7   0    0.77    0.80 
  20  -7   0   -0.04    0.55 
 -20  -7   0    0.28    0.50 
 -20   7   0    0.63    0.54 
  20   7   0   -0.69    0.51 
 -20   7   0    0.36    0.47 
   0  -8   0    4.73    0.98 
   0  -8   0    2.97    0.74 
   0  -8   0    4.15    0.79 
   0  -8   0    5.01    0.82 
   0  -8   0    6.00    1.00 
   0   8   0    6.25    1.00 
   0   8   0    5.45    0.69 
   0   8   0    6.16    0.83 
   0   8   0    4.72    0.77 
   1  -8   0   20.59    2.66 
   1  -8   0   27.01    2.79 
  -1  -8   0   20.82    2.77 
   1  -8   0   25.62    2.83 
  -1  -8   0   22.54    2.68 
  -1  -8   0   20.83    2.71 
   1  -8   0   24.15    2.74 
  -1  -8   0   23.33    2.53 
   1  -8   0   25.00    2.60 
  -1  -8   0   19.46    2.74 
   1   8   0   21.88    2.61 
  -1   8   0   24.97    2.64 
  -1   8   0   20.80    2.61 
   1   8   0   21.01    2.58 
  -1   8   0   24.06    2.29 
   1   8   0   22.98    2.33 
   1   8   0   23.36    2.50 
  -1   8   0   24.27    2.50 
  -2  -8   0    0.41    0.29 
   2  -8   0    0.07    0.26 
  -2  -8   0    0.16    0.27 
   2  -8   0    0.57    0.49 
  -2  -8   0    0.50    0.42 
   2  -8   0    0.79    0.42 
  -2  -8   0   -0.07    0.36 
  -2  -8   0    0.35    0.30 
   2  -8   0    0.33    0.32 
   2  -8   0   -0.23    0.29 
  -2   8   0    0.44    0.32 
   2   8   0    0.13    0.43 
  -2   8   0    0.30    0.43 
   2   8   0    0.68    0.30 
   2   8   0    0.39    0.26 
  -2   8   0    0.30    0.29 
   2   8   0    0.53    0.29 
   3  -8   0    4.64    0.90 
  -3  -8   0    4.48    0.98 
   3  -8   0    6.25    1.04 
   3  -8   0    4.26    0.80 
   3  -8   0    3.70    0.80 
  -3  -8   0    5.02    0.97 
  -3  -8   0    4.51    0.84 
   3  -8   0    6.53    1.10 
  -3  -8   0    4.95    0.89 
  -3  -8   0    8.78    0.90 
  -3   8   0    4.16    0.80 
   3   8   0    6.00    0.84 
   3   8   0    6.49    0.89 
   3   8   0    5.90    0.79 
   3   8   0    5.70    0.99 
  -3   8   0    4.72    0.95 
  -3   8   0    4.71    0.79 
   4  -8   0    0.81    0.36 
  -4  -8   0    2.60    0.58 
   4  -8   0    0.01    0.44 
   4  -8   0    1.04    0.48 
   4  -8   0    0.72    0.42 
  -4  -8   0    1.11    0.52 
  -4  -8   0    1.18    0.40 
  -4  -8   0    0.52    0.30 
   4  -8   0    0.83    0.37 
  -4  -8   0    1.27    0.56 
  -4   8   0    1.04    0.39 
   4   8   0    1.28    0.39 
  -4   8   0    1.88    0.59 
  -4   8   0    1.05    0.37 
   4   8   0    0.77    0.39 
   4   8   0    0.60    0.33 
   4   8   0    1.02    0.40 
  -5  -8   0    0.77    0.50 
  -5  -8   0    0.87    0.38 
  -5  -8   0    1.54    0.35 
   5  -8   0    1.71    0.61 
   5  -8   0    0.86    0.45 
   5  -8   0    2.11    0.60 
   5  -8   0    1.31    0.42 
  -5  -8   0    1.30    0.49 
   5  -8   0    2.22    0.51 
  -5  -8   0    1.06    0.56 
   5   8   0    1.78    0.46 
  -5   8   0    1.04    0.55 
   5   8   0    1.08    0.42 
  -5   8   0    1.69    0.44 
  -5   8   0    0.61    0.38 
   5   8   0    1.14    0.37 
   5   8   0    1.68    0.47 
   6  -8   0   -0.11    0.35 
  -6  -8   0    0.12    0.28 
   6  -8   0    0.04    0.34 
   6  -8   0    0.86    0.35 
  -6  -8   0    0.55    0.45 
   6  -8   0    0.35    0.45 
   6  -8   0    0.19    0.29 
  -6  -8   0    0.41    0.41 
  -6  -8   0   -0.26    0.37 
   6   8   0    0.34    0.27 
   6   8   0    0.12    0.29 
  -6   8   0    0.22    0.29 
  -6   8   0   -0.02    0.26 
   6   8   0    0.23    0.30 
   6   8   0    0.37    0.33 
  -6   8   0   -0.09    0.34 
  -7  -8   0   -0.06    0.28 
  -7  -8   0    0.29    0.37 
  -7  -8   0    0.44    0.38 
   7  -8   0   -0.05    0.42 
   7  -8   0   -0.09    0.42 
   7  -8   0   -0.45    0.24 
  -7  -8   0    0.20    0.39 
   7  -8   0   -0.13    0.27 
   7  -8   0   -0.14    0.27 
  -7   8   0   -0.52    0.35 
   7   8   0   -0.18    0.28 
   7   8   0    0.44    0.32 
   7   8   0   -0.40    0.23 
  -7   8   0    0.17    0.25 
   7   8   0   -0.03    0.27 
  -7   8   0    0.13    0.29 
   8  -8   0    1.02    0.55 
  -8  -8   0    2.18    0.48 
   8  -8   0    0.01    0.49 
  -8  -8   0    2.04    0.52 
   8  -8   0    1.20    0.49 
   8  -8   0    1.23    0.40 
  -8  -8   0    1.93    0.58 
  -8  -8   0   -0.25    0.39 
  -8  -8   0    1.17    0.60 
  -8   8   0    0.89    0.41 
  -8   8   0    1.52    0.55 
  -8   8   0    0.95    0.36 
   8   8   0    1.22    0.44 
   8   8   0    1.60    0.48 
   8   8   0    1.86    0.51 
  -9  -8   0    1.91    0.53 
  -9  -8   0    1.27    0.52 
  -9  -8   0    1.29    0.59 
   9  -8   0    1.34    0.60 
   9  -8   0    0.27    0.31 
  -9  -8   0    1.85    0.54 
   9  -8   0    0.37    0.53 
   9  -8   0    1.09    0.50 
  -9  -8   0    1.94    0.57 
   9   8   0    0.90    0.44 
  -9   8   0    0.60    0.51 
   9   8   0    0.87    0.41 
  -9   8   0    1.42    0.48 
   9   8   0    1.00    0.46 
  -9   8   0    1.27    0.36 
 -10  -8   0   -0.02    0.39 
 -10  -8   0   -0.25    0.40 
 -10  -8   0   -0.05    0.31 
 -10  -8   0    0.48    0.37 
  10  -8   0    0.28    0.30 
  10  -8   0   -0.19    0.48 
  10  -8   0    0.22    0.40 
 -10  -8   0    0.88    0.48 
  10   8   0   -0.10    0.35 
 -10   8   0   -0.10    0.28 
 -10   8   0   -0.16    0.22 
  10   8   0    0.03    0.31 
 -10   8   0   -0.10    0.45 
 -11  -8   0    9.66    1.71 
  11  -8   0   14.18    1.98 
 -11  -8   0   12.31    1.92 
  11  -8   0    9.85    1.83 
  11  -8   0   15.37    1.66 
 -11  -8   0   11.39    1.77 
 -11  -8   0   14.45    1.87 
 -11  -8   0   10.19    1.59 
  11   8   0   12.36    1.62 
 -11   8   0   13.24    1.79 
 -11   8   0   12.66    1.75 
  11   8   0   12.50    1.67 
  12  -8   0   -0.37    0.48 
 -12  -8   0   -0.12    0.46 
 -12  -8   0   -0.04    0.38 
 -12  -8   0   -0.03    0.35 
  12  -8   0   -0.20    0.41 
 -12   8   0   -0.48    0.22 
  12   8   0   -0.30    0.37 
 -12   8   0   -0.18    0.48 
  12   8   0   -0.09    0.26 
 -13  -8   0    7.34    1.20 
  13  -8   0    6.45    1.35 
  13  -8   0    5.41    1.23 
 -13  -8   0    7.27    1.33 
 -13  -8   0    5.82    1.14 
  13   8   0    6.16    1.01 
  13   8   0    7.58    1.19 
 -13   8   0    6.04    1.15 
 -13   8   0    7.07    1.17 
 -14  -8   0    0.26    0.42 
  14  -8   0    1.57    0.83 
  14  -8   0    0.41    0.42 
 -14  -8   0    0.88    0.62 
 -14  -8   0    1.09    0.53 
 -14   8   0    0.44    0.53 
 -14   8   0    0.51    0.48 
  14   8   0    1.26    0.46 
  14   8   0    1.65    0.58 
 -15  -8   0    3.08    0.94 
 -15  -8   0    4.32    0.93 
  15  -8   0    3.22    1.02 
  15  -8   0    4.36    1.03 
 -15  -8   0    3.23    0.81 
  15   8   0    2.88    0.79 
 -15   8   0    3.65    0.84 
  15   8   0    2.91    0.70 
 -15   8   0    2.68    0.80 
 -16  -8   0    0.25    0.48 
 -16  -8   0   -0.20    0.52 
  16  -8   0    0.70    0.75 
  16  -8   0    0.38    0.57 
 -16  -8   0    0.46    0.49 
  16   8   0    0.58    0.53 
 -16   8   0    0.30    0.54 
  16   8   0    0.48    0.34 
 -16   8   0    0.23    0.40 
 -17  -8   0    2.96    0.88 
  17  -8   0    2.32    1.01 
 -17  -8   0    2.31    0.73 
 -17  -8   0    3.07    0.78 
  17  -8   0    2.28    0.86 
 -17   8   0    1.99    0.73 
  17   8   0    1.55    0.68 
 -17   8   0    2.13    0.72 
  17   8   0    1.47    0.55 
 -18  -8   0   -0.22    0.46 
  18  -8   0    0.47    0.77 
 -18  -8   0    1.27    0.68 
 -18  -8   0    0.59    0.54 
  18  -8   0    0.28    0.54 
 -18   8   0    0.06    0.47 
  18   8   0    1.09    0.63 
 -18   8   0    1.29    0.63 
  18   8   0    0.32    0.43 
 -19  -8   0   -0.02    0.50 
   0  -9   0    0.01    0.31 
   0  -9   0   -0.36    0.28 
   0  -9   0    0.21    0.47 
   0  -9   0   -0.47    0.23 
   0  -9   0   -0.25    0.43 
   0   9   0   -0.03    0.44 
   0   9   0   -0.22    0.25 
   0   9   0   -0.02    0.24 
   1  -9   0   -0.41    0.36 
   1  -9   0   -0.07    0.36 
   1  -9   0   -0.15    0.31 
  -1  -9   0   -0.35    0.32 
  -1  -9   0   -0.11    0.24 
  -1  -9   0    0.09    0.42 
   1  -9   0    0.08    0.35 
  -1  -9   0    0.57    0.35 
  -1  -9   0    0.25    0.32 
   1  -9   0    0.01    0.33 
   1   9   0   -0.08    0.23 
  -1   9   0    0.39    0.32 
   1   9   0   -0.19    0.23 
   1   9   0   -0.28    0.24 
   1   9   0    0.00    0.48 
  -1   9   0   -0.67    0.43 
  -1   9   0    0.31    0.30 
  -2  -9   0   12.25    1.86 
  -2  -9   0   11.62    1.50 
   2  -9   0   12.10    1.78 
  -2  -9   0   13.41    1.85 
  -2  -9   0   13.93    1.63 
   2  -9   0    8.54    1.55 
  -2  -9   0   12.14    1.59 
   2  -9   0   12.01    1.86 
   2  -9   0   10.42    1.62 
   2  -9   0   13.84    1.68 
  -2   9   0   10.13    1.49 
  -2   9   0   13.53    1.79 
  -2   9   0   11.87    1.51 
   2   9   0   11.51    1.39 
   2   9   0   14.84    1.81 
   2   9   0   10.12    1.49 
   2   9   0   13.15    1.50 
  -3  -9   0    3.83    0.72 
   3  -9   0    2.49    0.62 
   3  -9   0    3.06    0.70 
  -3  -9   0    3.62    0.91 
   3  -9   0    2.27    0.66 
   3  -9   0    3.70    0.83 
  -3  -9   0    5.04    0.98 
   3  -9   0    2.09    0.78 
  -3  -9   0    4.74    0.83 
   3   9   0    2.00    0.74 
   3   9   0    3.10    0.67 
   3   9   0    3.60    0.64 
   3   9   0    3.15    0.63 
  -3   9   0    3.62    0.66 
  -3   9   0    2.85    0.80 
  -3   9   0    3.80    0.73 
  -4  -9   0    9.07    1.50 
  -4  -9   0    8.09    1.46 
   4  -9   0    7.47    1.41 
   4  -9   0    8.07    1.38 
   4  -9   0    9.51    1.30 
   4  -9   0    8.83    1.34 
  -4  -9   0    8.97    1.32 
   4  -9   0    7.51    1.23 
  -4  -9   0   10.72    1.42 
   4   9   0    6.80    1.18 
   4   9   0    8.00    1.11 
   4   9   0   10.69    1.25 
  -4   9   0    6.89    1.15 
  -4   9   0    8.08    1.40 
  -4   9   0   10.01    1.32 
  -5  -9   0    7.18    1.24 
   5  -9   0    6.63    1.02 
  -5  -9   0    7.26    1.11 
  -5  -9   0    3.27    0.98 
   5  -9   0    6.61    1.15 
   5  -9   0    5.85    1.19 
  -5  -9   0    5.38    0.98 
   5  -9   0    7.06    1.16 
   5  -9   0    5.15    0.92 
   5   9   0    5.44    0.89 
  -5   9   0    4.95    0.96 
   5   9   0    6.86    0.93 
  -5   9   0    5.53    1.07 
   5   9   0    5.45    0.94 
  -5   9   0    6.06    0.92 
   6  -9   0    1.88    0.49 
   6  -9   0    2.08    0.54 
   6  -9   0    1.98    0.66 
  -6  -9   0    0.72    0.59 
   6  -9   0    1.27    0.64 
   6  -9   0    3.42    0.80 
  -6  -9   0    1.14    0.47 
  -6  -9   0    0.94    0.50 
  -6  -9   0    1.30    0.64 
  -6   9   0    1.08    0.48 
   6   9   0    1.71    0.50 
  -6   9   0    1.98    0.50 
   6   9   0    2.68    0.59 
   6   9   0    2.16    0.49 
  -6   9   0    1.89    0.67 
   7  -9   0    0.69    0.37 
  -7  -9   0    2.26    0.73 
  -7  -9   0    0.56    0.54 
   7  -9   0    0.67    0.54 
   7  -9   0    1.11    0.43 
  -7  -9   0    1.18    0.54 
   7  -9   0    1.38    0.58 
   7  -9   0    0.68    0.51 
  -7  -9   0    0.98    0.42 
  -7  -9   0    1.19    0.52 
   7   9   0    1.02    0.44 
  -7   9   0    0.80    0.46 
  -7   9   0    0.49    0.54 
  -7   9   0    1.57    0.42 
   7   9   0    1.33    0.48 
   8  -9   0   13.56    1.82 
  -8  -9   0   10.42    1.62 
  -8  -9   0   10.46    1.66 
  -8  -9   0    8.21    1.51 
   8  -9   0   10.42    1.52 
  -8  -9   0    9.90    1.43 
   8  -9   0   11.39    1.67 
  -8  -9   0   13.59    1.88 
   8  -9   0   12.49    1.45 
   8  -9   0    8.72    1.66 
  -8   9   0    9.68    1.51 
   8   9   0   10.38    1.44 
  -8   9   0    9.79    1.62 
  -8   9   0   10.67    1.35 
   8   9   0    8.99    1.36 
  -9  -9   0    1.10    0.52 
  -9  -9   0    1.93    0.59 
   9  -9   0    1.00    0.51 
  -9  -9   0    0.39    0.46 
   9  -9   0    1.40    0.69 
   9  -9   0    0.95    0.44 
   9  -9   0    2.08    0.47 
  -9  -9   0    0.45    0.55 
  -9  -9   0    0.36    0.54 
   9  -9   0    0.53    0.57 
  -9   9   0    2.24    0.61 
   9   9   0    0.99    0.48 
   9   9   0    1.15    0.51 
  -9   9   0    1.55    0.65 
  -9   9   0    1.55    0.42 
  10  -9   0    5.25    0.94 
 -10  -9   0    4.98    0.96 
  10  -9   0    5.80    1.13 
 -10  -9   0    4.87    1.18 
  10  -9   0    4.49    1.13 
 -10  -9   0    8.83    1.21 
 -10  -9   0    4.17    1.01 
  10  -9   0    4.96    1.15 
 -10  -9   0    4.73    1.11 
 -10   9   0    6.40    0.90 
 -10   9   0    6.17    1.11 
 -10   9   0    7.66    1.14 
  10   9   0    7.03    1.05 
  10   9   0    6.16    1.03 
  11  -9   0    0.44    0.34 
  11  -9   0    0.06    0.48 
 -11  -9   0    1.33    0.69 
  11  -9   0    0.56    0.48 
 -11  -9   0    0.16    0.44 
  11  -9   0    0.26    0.67 
 -11  -9   0    1.77    0.64 
  11   9   0    0.76    0.41 
 -11   9   0    0.34    0.49 
 -11   9   0    0.38    0.42 
  11   9   0    0.29    0.46 
  12  -9   0    3.39    0.65 
 -12  -9   0    2.33    0.74 
  12  -9   0    1.63    0.76 
  12  -9   0    1.56    0.69 
 -12  -9   0    2.65    0.84 
  12  -9   0    1.64    0.81 
 -12  -9   0    2.37    0.68 
 -12   9   0    3.35    0.80 
 -12   9   0    1.48    0.68 
  12   9   0    1.33    0.59 
  12   9   0    3.10    0.69 
 -13  -9   0   -0.22    0.45 
  13  -9   0   -0.07    0.50 
  13  -9   0    0.39    0.60 
  13  -9   0    0.30    0.35 
 -13  -9   0    0.35    0.43 
 -13  -9   0   -0.66    0.46 
  13   9   0   -0.01    0.38 
  13   9   0   -0.36    0.49 
 -13   9   0    0.24    0.42 
 -13   9   0   -0.44    0.43 
 -14  -9   0    0.88    0.57 
  14  -9   0    0.88    0.62 
 -14  -9   0    0.97    0.55 
 -14  -9   0   -0.20    0.66 
  14  -9   0    1.49    0.80 
  14  -9   0    1.09    0.47 
  14   9   0    1.77    0.52 
  14   9   0    0.44    0.58 
 -14   9   0    0.53    0.62 
 -14   9   0    0.92    0.58 
 -15  -9   0   -0.23    0.55 
  15  -9   0    0.26    0.57 
 -15  -9   0   -0.29    0.42 
  15  -9   0    1.05    0.79 
  15  -9   0    0.33    0.37 
 -15  -9   0    0.04    0.46 
 -15   9   0    0.28    0.51 
  15   9   0   -0.32    0.45 
 -15   9   0    0.46    0.51 
  15   9   0    0.20    0.40 
 -16  -9   0    2.64    0.92 
  16  -9   0    2.64    0.95 
  16  -9   0    3.41    0.68 
 -16  -9   0    1.46    0.67 
  16  -9   0    2.87    1.09 
 -16  -9   0    2.71    0.77 
  16   9   0    2.23    0.62 
 -16   9   0    1.60    0.69 
 -16   9   0    3.48    0.86 
  16   9   0    0.99    0.63 
   0 -10   0    2.83    0.76 
   0 -10   0    3.26    0.73 
   0 -10   0    4.45    1.08 
   0 -10   0    3.63    0.91 
   0  10   0    3.10    0.68 
   0  10   0    3.44    0.72 
   0  10   0    4.18    0.98 
  -1 -10   0    0.68    0.47 
  -1 -10   0    1.10    0.65 
   1 -10   0    0.80    0.48 
   1 -10   0   -0.01    0.36 
  -1 -10   0    0.06    0.51 
   1 -10   0    0.66    0.52 
   1 -10   0    0.11    0.58 
  -1 -10   0    1.14    0.48 
   1  10   0    0.26    0.41 
   1  10   0    0.91    0.41 
  -1  10   0    1.09    0.45 
  -1  10   0   -0.01    0.38 
  -1  10   0    1.62    0.62 
  -2 -10   0   -0.21    0.33 
   2 -10   0   -0.09    0.35 
  -2 -10   0    0.06    0.53 
  -2 -10   0   -0.09    0.37 
   2 -10   0   -0.54    0.45 
   2 -10   0    0.00    0.48 
  -2 -10   0    1.02    0.54 
   2 -10   0   -0.27    0.31 
   2  10   0    0.14    0.37 
  -2  10   0   -0.79    0.47 
  -2  10   0   -0.19    0.26 
  -2  10   0    0.26    0.38 
   2  10   0    0.17    0.35 
   3 -10   0    0.06    0.34 
   3 -10   0    0.68    0.40 
  -3 -10   0   -0.01    0.37 
  -3 -10   0    0.09    0.43 
   3 -10   0    0.41    0.53 
   3 -10   0    0.31    0.53 
  -3 -10   0    0.13    0.49 
  -3 -10   0    0.44    0.60 
   3 -10   0   -0.06    0.41 
   3  10   0    0.15    0.35 
  -3  10   0    0.47    0.38 
  -3  10   0    0.43    0.40 
   3  10   0    0.22    0.40 
  -3  10   0    0.31    0.53 
   4 -10   0    1.94    0.73 
   4 -10   0    1.01    0.71 
  -4 -10   0    2.03    0.63 
  -4 -10   0    0.00    0.51 
   4 -10   0    0.93    0.49 
   4 -10   0    0.52    0.56 
  -4 -10   0    0.81    0.64 
  -4 -10   0    0.38    0.42 
   4 -10   0    1.47    0.48 
   4  10   0    0.63    0.40 
  -4  10   0    0.95    0.41 
  -4  10   0    2.54    0.79 
   4  10   0    1.03    0.45 
   4  10   0    1.35    0.49 
  -4  10   0    0.54    0.40 
  -5 -10   0   10.97    1.84 
   5 -10   0    9.36    1.76 
  -5 -10   0   14.65    2.00 
   5 -10   0   11.64    1.69 
   5 -10   0   12.06    1.60 
  -5 -10   0   12.61    1.71 
  -5 -10   0    9.71    1.59 
   5 -10   0    9.98    1.69 
   5 -10   0   10.20    1.52 
   5  10   0   10.34    1.38 
  -5  10   0   10.66    1.63 
  -5  10   0   10.35    1.42 
   5  10   0   11.62    1.55 
  -5  10   0    7.90    1.46 
   5  10   0   10.12    1.44 
   6 -10   0    0.22    0.38 
   6 -10   0    0.67    0.48 
  -6 -10   0   -0.07    0.48 
   6 -10   0    0.02    0.52 
  -6 -10   0    0.13    0.59 
   6 -10   0    0.43    0.36 
  -6 -10   0    0.11    0.42 
  -6 -10   0    0.33    0.52 
   6 -10   0   -0.50    0.45 
  -6  10   0    0.04    0.38 
   6  10   0   -0.53    0.24 
  -6  10   0    0.01    0.31 
  -6  10   0    0.01    0.55 
   6  10   0   -0.10    0.35 
   7 -10   0    2.84    0.71 
   7 -10   0    4.98    1.06 
   7 -10   0    3.40    0.98 
  -7 -10   0    4.01    0.80 
  -7 -10   0    2.14    0.68 
  -7 -10   0    2.29    0.84 
   7 -10   0    1.98    0.70 
   7 -10   0    3.81    0.72 
  -7 -10   0    3.68    1.00 
  -7 -10   0    2.06    0.71 
  -7  10   0    2.73    0.60 
   7  10   0    2.87    0.68 
  -7  10   0    2.34    0.79 
   7  10   0    2.13    0.64 
  -7  10   0    3.11    0.71 
  -8 -10   0   -0.03    0.39 
   8 -10   0    0.17    0.49 
   8 -10   0    0.19    0.54 
   8 -10   0    0.42    0.51 
  -8 -10   0   -0.18    0.50 
  -8 -10   0    0.12    0.61 
   8 -10   0    0.24    0.38 
  -8 -10   0   -0.23    0.47 
  -8 -10   0    0.23    0.37 
   8 -10   0    0.10    0.31 
  -8  10   0    0.30    0.30 
  -8  10   0   -0.09    0.53 
   8  10   0    0.10    0.37 
  -8  10   0    0.23    0.46 
   8  10   0   -0.06    0.44 
   9 -10   0    0.23    0.58 
   9 -10   0    0.02    0.55 
  -9 -10   0    1.79    0.78 
   9 -10   0    0.28    0.36 
  -9 -10   0   -0.49    0.37 
  -9 -10   0    0.45    0.46 
   9 -10   0    0.08    0.48 
  -9 -10   0   -0.11    0.49 
   9 -10   0    0.62    0.42 
  -9  10   0   -0.07    0.31 
   9  10   0   -0.35    0.35 
  -9  10   0    0.14    0.51 
  -9  10   0    0.26    0.46 
   9  10   0   -0.15    0.31 
 -10 -10   0    0.89    0.52 
  10 -10   0    1.22    0.67 
  10 -10   0    0.90    0.49 
 -10 -10   0    1.65    0.79 
 -10 -10   0    0.05    0.52 
  10 -10   0    0.71    0.53 
  10 -10   0    0.38    0.39 
  10 -10   0    0.42    0.67 
 -10  10   0    0.13    0.47 
 -10  10   0    0.77    0.62 
 -10  10   0    1.40    0.42 
  10  10   0    0.85    0.53 
  10  10   0    0.21    0.41 
 -11 -10   0    2.41    0.96 
  11 -10   0    6.33    1.19 
  11 -10   0    5.06    0.90 
  11 -10   0    3.65    0.88 
 -11 -10   0    5.47    1.09 
  11 -10   0    2.54    1.12 
  11 -10   0    5.34    1.26 
 -11 -10   0    3.84    1.03 
 -11  10   0    5.83    1.10 
 -11  10   0    5.84    1.08 
  11  10   0    5.37    0.98 
  11  10   0    5.50    0.98 
  12 -10   0    1.40    0.84 
 -12 -10   0    1.76    0.83 
 -12 -10   0    4.91    0.98 
  12 -10   0    1.61    0.73 
  12 -10   0    2.51    0.72 
  12 -10   0    3.38    0.69 
 -12 -10   0    2.36    0.83 
  12 -10   0    0.91    0.73 
 -12  10   0    2.42    0.85 
 -12  10   0    2.09    0.77 
  12  10   0    2.47    0.71 
  12  10   0    3.16    0.74 
 -13 -10   0    8.95    1.66 
  13 -10   0    8.35    1.65 
 -13 -10   0    8.91    1.53 
  13 -10   0    8.00    1.22 
 -13 -10   0    7.11    1.36 
  13 -10   0    8.48    1.64 
  13 -10   0    6.44    1.37 
  13  10   0    8.62    1.33 
 -13  10   0    6.97    1.32 
  13  10   0    7.48    1.25 
 -13  10   0    6.10    1.26 
  14  10   0    0.11    0.41 
   0 -11   0    0.63    0.67 
   0 -11   0   -0.05    0.48 
   0 -11   0    0.22    0.52 
   0 -11   0    0.23    0.41 
   0  11   0   -0.05    0.35 
   0  11   0    0.56    0.39 
   1 -11   0    2.69    0.63 
  -1 -11   0    3.80    1.05 
   1 -11   0    1.55    0.79 
  -1 -11   0    1.69    0.57 
  -1 -11   0    1.81    0.69 
  -1 -11   0    0.16    0.60 
   1 -11   0    1.54    0.72 
   1 -11   0    1.97    0.67 
   1  11   0    1.57    0.57 
  -1  11   0    2.21    0.66 
   1  11   0    3.52    0.70 
  -1  11   0    1.33    0.56 
  -2 -11   0    5.81    1.38 
   2 -11   0    5.74    1.13 
  -2 -11   0    6.28    1.33 
   2 -11   0    3.62    1.21 
  -2 -11   0    6.90    1.18 
   2 -11   0    7.25    1.16 
  -2 -11   0    8.28    1.31 
   2 -11   0    4.07    1.19 
  -2  11   0    6.50    1.29 
  -2  11   0    6.71    1.10 
   2  11   0    5.94    1.06 
  -2  11   0    6.04    1.08 
   2  11   0    8.79    1.18 
  -3 -11   0    0.50    0.70 
   3 -11   0    0.22    0.63 
   3 -11   0    0.47    0.66 
   3 -11   0    1.31    0.54 
   3 -11   0    0.63    0.52 
  -3 -11   0    0.95    0.49 
  -3 -11   0    0.50    0.47 
  -3 -11   0    0.61    0.62 
  -3  11   0    1.60    0.75 
   3  11   0    0.60    0.42 
  -3  11   0    0.57    0.46 
   3  11   0    0.62    0.45 
  -3  11   0    1.81    0.58 
  -4 -11   0    2.73    0.75 
   4 -11   0    3.24    0.76 
   4 -11   0    1.50    0.79 
  -4 -11   0    0.89    0.73 
   4 -11   0    2.79    0.94 
  -4 -11   0    1.61    0.81 
   4 -11   0    2.94    0.72 
  -4 -11   0    2.56    0.78 
   4  11   0    1.78    0.60 
  -4  11   0    3.21    0.77 
   4  11   0    2.70    0.72 
  -4  11   0    2.06    0.82 
  -4  11   0    2.59    0.65 
   5 -11   0    0.36    0.44 
  -5 -11   0    0.42    0.65 
  -5 -11   0    0.01    0.45 
   5 -11   0    0.38    0.66 
  -5 -11   0   -0.73    0.51 
   5 -11   0   -0.26    0.38 
   5 -11   0    0.00    0.54 
  -5 -11   0    0.07    0.42 
  -5  11   0    0.15    0.35 
  -5  11   0   -0.37    0.60 
  -5  11   0    0.11    0.33 
   5  11   0   -0.12    0.38 
  -6 -11   0    0.45    0.46 
   6 -11   0    0.55    0.48 
  -6 -11   0    0.58    0.67 
  -6 -11   0    0.78    0.51 
  -6 -11   0    0.65    0.66 
   6 -11   0    0.37    0.59 
  -6 -11   0    0.65    0.57 
   6 -11   0    0.99    0.46 
   6 -11   0    1.23    0.78 
  -6  11   0    1.06    0.70 
  -6  11   0    0.88    0.41 
  -6  11   0    0.78    0.49 
   6  11   0    1.22    0.55 
  -7 -11   0    0.47    0.59 
  -7 -11   0    0.61    0.52 
  -7 -11   0    0.35    0.62 
  -7 -11   0    0.70    0.53 
  -7 -11   0    0.20    0.73 
   7 -11   0    0.09    0.63 
   7 -11   0    0.36    0.64 
   7 -11   0    0.26    0.45 
   7 -11   0    0.35    0.42 
  -7  11   0    0.62    0.34 
  -7  11   0    0.74    0.49 
  -7  11   0    0.35    0.57 
   7  11   0    0.31    0.48 
   8 -11   0   -0.11    0.50 
   8 -11   0    0.90    0.73 
  -8 -11   0    0.72    0.51 
  -8 -11   0    0.20    0.61 
  -8 -11   0    0.12    0.61 
   8 -11   0    0.32    0.42 
   8 -11   0    0.31    0.60 
   8 -11   0    0.43    0.40 
  -8  11   0    0.30    0.59 
  -8  11   0   -0.35    0.32 
   8  11   0   -0.02    0.43 
  -8  11   0    0.24    0.39 
   8  11   0    0.92    0.54 
   9 -11   0    0.93    0.51 
   9 -11   0    1.38    0.78 
   9 -11   0    0.23    0.72 
  -9 -11   0    0.45    0.78 
   9 -11   0    2.30    0.59 
  -9 -11   0    1.67    0.67 
  -9 -11   0    0.37    0.58 
   9 -11   0    0.24    0.56 
   9  11   0    0.64    0.59 
  -9  11   0    1.62    0.75 
   9  11   0    0.49    0.46 
  -9  11   0    1.12    0.46 
  -9  11   0    0.11    0.55 
 -10  11   0    2.95    0.64 
  10  11   0    1.90    0.71 
 -25   0   1    3.32    0.68 
  25   0  -1    2.35    0.94 
  25   0  -1    3.64    1.32 
  24   0  -1    0.73    0.96 
  24   0  -1    0.25    0.68 
 -24   0   1    0.18    0.35 
 -23   0   1   17.95    2.08 
  23   0  -1   16.94    2.52 
  23   0  -1   17.58    2.79 
  23   0  -1   18.90    2.09 
 -22   0   1   -0.03    0.30 
 -22   0   1   -0.12    0.29 
  22   0  -1    0.44    0.52 
  22   0  -1   -0.47    0.71 
  22   0  -1   -0.26    0.41 
 -21   0   1    0.89    0.37 
 -21   0   1    0.72    0.38 
  21   0  -1    1.12    0.50 
  21   0  -1   -0.01    0.49 
  21   0  -1    1.09    0.80 
 -20   0   1   -0.42    0.25 
  20   0  -1   -0.29    0.42 
 -20   0   1    0.08    0.30 
  20   0  -1   -0.25    0.55 
  20   0  -1   -0.02    0.33 
  19   0  -1    9.29    1.22 
 -19   0   1   10.80    1.36 
  19   0  -1    9.41    1.36 
  19   0  -1    9.19    1.73 
 -19   0   1   13.30    1.33 
  19   0  -1    9.58    1.53 
 -18   0   1    0.16    0.26 
  18   0  -1    0.38    0.37 
  18   0  -1    0.10    0.36 
 -18   0   1    0.30    0.29 
  18   0  -1    0.02    0.22 
 -18   0   1   -0.11    0.26 
  18   0  -1   -0.05    0.49 
 -18   0   1    0.22    0.25 
 -17   0   1    6.72    1.11 
 -17   0   1    9.10    1.10 
  17   0  -1    8.05    1.01 
 -17   0   1    9.00    1.15 
  17   0  -1    8.19    1.16 
 -17   0   1    8.52    0.95 
  17   0  -1    5.45    1.32 
  17   0  -1    7.72    1.26 
 -17   0   1    9.30    1.17 
 -16   0   1   -0.04    0.23 
  16   0  -1    0.11    0.33 
 -16   0   1    0.11    0.16 
 -16   0   1    0.05    0.19 
  16   0  -1    0.09    0.20 
 -16   0   1    0.05    0.19 
 -16   0   1   -0.13    0.20 
 -16   0   1   -0.01    0.25 
  16   0  -1    0.03    0.28 
  16   0  -1   -0.11    0.38 
  15   0  -1    0.77    0.27 
  15   0  -1    0.53    0.34 
  15   0  -1    0.32    0.35 
  15   0  -1    0.65    0.53 
 -15   0   1    0.99    0.29 
 -15   0   1    1.38    0.37 
 -15   0   1    0.71    0.30 
 -15   0   1    0.88    0.31 
 -15   0   1    0.39    0.20 
 -15   0   1    1.01    0.33 
  14   0  -1   -0.08    0.17 
 -14   0   1    0.34    0.23 
 -14   0   1   -0.15    0.19 
  14   0  -1    0.16    0.24 
  14   0  -1   -0.01    0.21 
 -14   0   1   -0.22    0.16 
 -14   0   1    0.18    0.22 
  14   0  -1    0.07    0.28 
 -14   0   1   -0.16    0.13 
 -14   0   1    0.00    0.13 
  14   0  -1    0.06    0.42 
  13   0  -1    3.57    0.56 
 -13   0   1    2.17    0.47 
  13   0  -1    2.74    0.45 
 -13   0   1    3.46    0.53 
 -13   0   1    3.95    0.56 
  13   0  -1    4.12    0.83 
 -13   0   1    2.30    0.48 
 -13   0   1    2.94    0.41 
 -13   0   1    3.07    0.50 
  13   0  -1    3.04    0.57 
  13   0  -1    2.19    0.50 
  12   0  -1   -0.01    0.38 
 -12   0   1    0.84    0.25 
  12   0  -1    0.52    0.30 
  12   0  -1    0.43    0.18 
 -12   0   1    0.30    0.16 
 -12   0   1    0.32    0.15 
 -12   0   1    0.30    0.17 
  12   0  -1    0.13    0.17 
  12   0  -1    0.79    0.27 
 -12   0   1    0.76    0.24 
 -11   0   1  166.84   14.38 
  11   0  -1  146.88   14.81 
 -11   0   1  169.49   14.85 
 -11   0   1  151.37   15.81 
  11   0  -1  167.62   14.99 
  11   0  -1  143.37   15.94 
 -11   0   1  159.01   15.73 
 -11   0   1  132.95   17.67 
 -11   0   1  182.64   16.38 
  11   0  -1  160.77   16.06 
  10   0  -1    0.40    0.18 
  10   0  -1    0.25    0.22 
 -10   0   1    0.27    0.15 
  10   0  -1   -0.01    0.12 
  10   0  -1    0.74    0.38 
 -10   0   1    0.18    0.11 
 -10   0   1    0.06    0.14 
 -10   0   1   -0.03    0.11 
 -10   0   1    0.12    0.05 
  10   0  -1    0.12    0.20 
 -10   0   1    0.29    0.16 
   9   0  -1   48.04    4.78 
  -9   0   1   49.17    4.99 
  -9   0   1   54.12    4.74 
   9   0  -1   52.84    4.72 
   9   0  -1   52.07    5.33 
  -9   0   1   41.15    5.30 
  -9   0   1   45.44    4.53 
  -9   0   1   50.50    5.20 
   9   0  -1   57.42    5.20 
   9   0  -1   51.47    5.12 
  -8   0   1    0.08    0.10 
   8   0  -1    0.02    0.04 
  -8   0   1   -0.01    0.05 
   8   0  -1   -0.13    0.19 
  -8   0   1   -0.18    0.09 
   8   0  -1    0.12    0.16 
   8   0  -1    0.30    0.17 
   8   0  -1   -0.03    0.11 
   8   0  -1    0.21    0.13 
  -8   0   1    0.03    0.11 
  -8   0   1   -0.02    0.07 
  -8   0   1    0.08    0.13 
   7   0  -1   90.61    9.12 
   7   0  -1   94.07    8.21 
   7   0  -1   98.75   10.09 
  -7   0   1   98.37    8.48 
  -7   0   1   84.97    8.22 
  -7   0   1   79.92    9.33 
  -7   0   1   86.84    9.02 
   7   0  -1   80.67    9.56 
   7   0  -1   90.86    9.04 
   7   0  -1   92.76    8.47 
   7   0  -1   95.76    8.56 
   6   0  -1    0.04    0.14 
   6   0  -1   -0.12    0.07 
   6   0  -1    0.33    0.22 
   6   0  -1   -0.01    0.04 
   6   0  -1    0.24    0.12 
   6   0  -1   -0.13    0.09 
  -6   0   1   -0.11    0.07 
   6   0  -1   -0.09    0.08 
  -6   0   1   -0.01    0.05 
  -6   0   1    0.13    0.12 
  -6   0   1   -0.09    0.09 
  -6   0   1    0.03    0.07 
  -6   0   1   -0.23    0.07 
   5   0  -1    1.42    0.26 
   5   0  -1    1.92    0.28 
  -5   0   1    1.42    0.27 
  -5   0   1    1.66    0.26 
   5   0  -1    1.98    0.37 
   5   0  -1    1.77    0.19 
  -5   0   1    1.89    0.28 
   5   0  -1    2.66    0.28 
   5   0  -1    1.63    0.29 
  -5   0   1    1.50    0.22 
  -5   0   1    1.73    0.27 
  -5   0   1    1.92    0.20 
   5   0  -1    1.85    0.25 
   4   0  -1    0.03    0.07 
  -4   0   1   -0.04    0.05 
   4   0  -1   -0.04    0.03 
  -4   0   1    0.05    0.04 
  -4   0   1   -0.07    0.06 
  -4   0   1    0.22    0.11 
   4   0  -1    0.11    0.08 
   4   0  -1   -0.01    0.05 
   4   0  -1    0.17    0.09 
  -4   0   1    0.05    0.05 
   4   0  -1   -0.10    0.05 
  -4   0   1    0.04    0.09 
  -4   0   1    0.03    0.08 
   4   0  -1    0.25    0.12 
   4   0  -1    0.28    0.16 
  -3   0   1  172.14   15.74 
   3   0  -1  165.73   18.79 
  -3   0   1  169.77   15.86 
  -3   0   1  164.89   17.80 
  -3   0   1  168.97   16.83 
   3   0  -1  158.19   15.36 
   3   0  -1  164.86   15.74 
  -3   0   1  171.87   15.37 
  -3   0   1  163.59   17.37 
   3   0  -1  169.84   15.86 
   3   0  -1  160.62   16.80 
   3   0  -1  155.47   16.83 
   3   0  -1  195.49   17.80 
  -3   0   1  173.98   16.80 
  -3   0   1  169.03   18.79 
   3   0  -1  170.24   17.37 
   2   0  -1    0.08    0.03 
  -2   0   1    0.04    0.03 
   2   0  -1    0.03    0.04 
  -2   0   1    0.01    0.05 
   2   0  -1    0.02    0.03 
   2   0  -1   -0.02    0.02 
  -2   0   1    0.02    0.05 
  -2   0   1    0.05    0.03 
   2   0  -1    0.01    0.02 
  -2   0   1    0.02    0.03 
   2   0  -1    0.08    0.05 
   2   0  -1    0.01    0.03 
  -2   0   1   -0.11    0.05 
  -2   0   1    0.00    0.03 
   2   0  -1    0.05    0.06 
   0   0   1   -0.44    0.01 
   0   0  -1   -0.44    0.01 
   0   0   1   -0.44    0.01 
   0   0  -1   -0.43    0.01 
   0   0  -1   -0.44    0.01 
   0   0   1   -0.45    0.01 
   0   0   1   -0.40    0.01 
   0   0  -1   -0.44    0.01 
  -1   0  -1  114.32   10.17 
  -1   0  -1  112.62   11.11 
  -1   0  -1  115.40   11.78 
   1   0   1  105.71   11.50 
   1   0   1  111.40   11.16 
   1   0   1  110.79   11.78 
  -1   0  -1  107.03   11.25 
   1   0   1  128.85   12.44 
  -1   0  -1  101.69   12.44 
  -1   0  -1  110.08   10.48 
  -2   0  -1    0.07    0.04 
   2   0   1    0.03    0.04 
  -2   0  -1    0.03    0.05 
  -2   0  -1   -0.11    0.04 
  -2   0  -1    0.00    0.06 
   2   0   1    0.10    0.05 
  -2   0  -1    0.20    0.11 
  -2   0  -1   -0.09    0.04 
  -2   0  -1   -0.05    0.04 
   2   0   1    0.00    0.07 
   2   0   1   -0.08    0.03 
   2   0   1    0.10    0.10 
  -2   0  -1   -0.01    0.05 
   2   0   1    0.02    0.05 
   2   0   1    0.09    0.06 
   2   0   1    0.04    0.06 
  -3   0  -1   22.30    2.11 
  -3   0  -1   22.60    1.96 
  -3   0  -1   17.37    1.99 
   3   0   1   19.23    2.10 
   3   0   1   15.08    1.89 
   3   0   1   17.21    1.91 
  -3   0  -1   21.09    1.92 
  -3   0  -1   19.44    1.79 
   3   0   1   15.28    1.75 
   3   0   1   18.36    1.96 
  -3   0  -1   19.20    1.76 
   3   0   1   16.88    1.99 
  -3   0  -1   20.19    1.94 
   3   0   1   17.69    1.78 
   4   0   1   -0.04    0.08 
  -4   0  -1   -0.16    0.07 
   4   0   1   -0.09    0.06 
  -4   0  -1    0.00    0.10 
  -4   0  -1    0.04    0.07 
   4   0   1    0.05    0.10 
   4   0   1    0.10    0.07 
   4   0   1    0.17    0.18 
  -4   0  -1    0.05    0.08 
   4   0   1    0.04    0.08 
  -4   0  -1    0.01    0.09 
  -4   0  -1    0.13    0.08 
   4   0   1    0.15    0.11 
  -4   0  -1    0.14    0.09 
  -5   0  -1  330.52   27.79 
   5   0   1  320.97   31.46 
   5   0   1  311.96   29.71 
  -5   0  -1  273.10   27.12 
  -5   0  -1  254.51   33.20 
  -5   0  -1  254.98   30.69 
  -5   0  -1  320.73   29.77 
   5   0   1  305.10   30.05 
  -5   0  -1  297.10   31.46 
   5   0   1  295.11   33.21 
  -5   0  -1  321.47   28.03 
   5   0   1  299.23   28.00 
  -6   0  -1   -0.05    0.04 
  -6   0  -1   -0.24    0.08 
  -6   0  -1   -0.07    0.10 
   6   0   1    0.00    0.12 
  -6   0  -1   -0.22    0.07 
   6   0   1    0.31    0.11 
   6   0   1   -0.11    0.19 
  -6   0  -1    0.15    0.10 
  -6   0  -1   -0.03    0.11 
   6   0   1    0.00    0.10 
   6   0   1   -0.16    0.11 
  -7   0  -1   41.65    4.61 
  -7   0  -1   46.58    4.33 
   7   0   1   39.51    4.88 
   7   0   1   48.57    4.31 
  -7   0  -1   42.04    4.88 
  -7   0  -1   46.23    4.79 
   7   0   1   42.79    4.37 
   7   0   1   50.46    4.71 
   7   0   1   49.90    4.74 
  -7   0  -1   47.99    5.16 
  -7   0  -1   46.74    4.16 
   8   0   1    0.28    0.16 
  -8   0  -1    0.09    0.11 
   8   0   1    0.01    0.10 
  -8   0  -1   -0.01    0.11 
   8   0   1   -0.04    0.13 
  -8   0  -1   -0.03    0.09 
   8   0   1    0.48    0.26 
  -8   0  -1    0.04    0.04 
  -8   0  -1    0.04    0.13 
  -8   0  -1    0.15    0.12 
   8   0   1    0.09    0.11 
   9   0   1  140.96   13.96 
  -9   0  -1  133.20   13.18 
  -9   0  -1  134.71   12.33 
   9   0   1  133.20   13.30 
  -9   0  -1  108.83   13.59 
   9   0   1  129.41   12.43 
  -9   0  -1  142.39   13.95 
   9   0   1  134.25   12.30 
  -9   0  -1  137.77   11.96 
  -9   0  -1  123.86   14.70 
   9   0   1  126.18   13.34 
 -10   0  -1    0.12    0.14 
 -10   0  -1    0.27    0.14 
  10   0   1    0.29    0.14 
  10   0   1    0.03    0.13 
 -10   0  -1    0.42    0.18 
  10   0   1    0.78    0.36 
 -10   0  -1    0.58    0.19 
  10   0   1    0.13    0.20 
  10   0   1    0.06    0.16 
 -10   0  -1    0.09    0.17 
  11   0   1   77.42    7.31 
 -11   0  -1   63.65    7.11 
 -11   0  -1   64.37    7.27 
 -11   0  -1   69.80    6.45 
  11   0   1   74.60    7.02 
  11   0   1   65.76    7.04 
  11   0   1   64.00    6.51 
 -11   0  -1   71.06    6.83 
 -11   0  -1   65.60    7.67 
  11   0   1   66.19    6.41 
 -11   0  -1   64.99    6.85 
  12   0   1   -0.32    0.29 
 -12   0  -1    0.43    0.19 
  12   0   1    0.34    0.17 
 -12   0  -1    0.23    0.20 
 -12   0  -1    0.20    0.20 
 -12   0  -1    0.17    0.15 
 -12   0  -1    0.37    0.20 
  12   0   1   -0.07    0.20 
  12   0   1    0.38    0.22 
 -12   0  -1    0.25    0.14 
  12   0   1    0.16    0.17 
  13   0   1   12.24    1.48 
 -13   0  -1   10.54    1.43 
 -13   0  -1   11.02    1.53 
  13   0   1   14.74    1.39 
 -13   0  -1   12.92    1.36 
  13   0   1   11.19    1.46 
 -13   0  -1   14.06    1.34 
 -13   0  -1   11.77    1.36 
  13   0   1   14.08    1.29 
  13   0   1    9.85    1.64 
  14   0   1    0.03    0.28 
  14   0   1    0.39    0.19 
 -14   0  -1    0.22    0.22 
 -14   0  -1    0.11    0.16 
 -14   0  -1    0.32    0.22 
 -14   0  -1   -0.33    0.15 
  14   0   1    0.01    0.47 
  14   0   1    0.15    0.24 
 -14   0  -1    0.34    0.20 
 -14   0  -1    0.16    0.22 
 -15   0  -1    3.25    0.66 
 -15   0  -1    4.32    0.70 
 -15   0  -1    4.54    0.61 
  15   0   1    5.17    0.70 
  15   0   1    2.35    0.68 
  15   0   1    4.24    0.58 
  15   0   1    4.13    0.98 
 -15   0  -1    4.13    0.64 
 -15   0  -1    4.90    0.74 
 -15   0  -1    4.63    0.66 
  16   0   1    0.09    0.31 
 -16   0  -1    0.17    0.25 
  16   0   1   -0.19    0.38 
 -16   0  -1    0.10    0.22 
  16   0   1    0.15    0.29 
 -16   0  -1    0.52    0.28 
 -16   0  -1   -0.28    0.16 
 -16   0  -1    0.08    0.22 
 -16   0  -1    0.33    0.26 
  16   0   1   -0.06    0.17 
  17   0   1    8.70    1.47 
 -17   0  -1    9.40    1.08 
  17   0   1    8.61    1.07 
  17   0   1    6.80    0.90 
 -17   0  -1    8.81    1.18 
  17   0   1    7.37    1.20 
 -17   0  -1    7.47    0.91 
 -17   0  -1    6.65    1.07 
 -17   0  -1    6.30    1.06 
 -18   0  -1   -0.09    0.22 
 -18   0  -1    0.29    0.28 
 -18   0  -1    0.16    0.29 
  18   0   1   -0.06    0.21 
 -18   0  -1    0.30    0.30 
  18   0   1    0.36    0.50 
  18   0   1    0.36    0.32 
 -18   0  -1   -0.21    0.24 
  18   0   1    0.51    0.46 
  19   0   1    0.17    0.52 
 -19   0  -1    1.16    0.38 
  19   0   1    0.58    0.35 
 -19   0  -1    0.84    0.35 
 -19   0  -1    0.25    0.32 
  19   0   1    0.24    0.48 
  20   0   1    0.03    0.28 
 -20   0  -1    0.15    0.34 
  20   0   1   -0.36    0.50 
  20   0   1    0.11    0.44 
 -20   0  -1   -0.03    0.28 
 -20   0  -1   -0.02    0.29 
  21   0   1    0.03    0.61 
  21   0   1   -0.20    0.48 
  21   0   1    0.53    0.40 
 -21   0  -1    0.44    0.34 
 -21   0  -1    0.36    0.32 
  22   0   1    0.35    0.43 
 -22   0  -1    0.08    0.31 
 -22   0  -1   -0.27    0.30 
  22   0   1   -0.37    0.67 
  22   0   1    0.53    0.64 
 -23   0  -1   10.32    1.33 
  23   0   1   10.59    1.69 
 -23   0  -1    8.70    1.36 
  23   0   1    6.79    1.77 
  23   0   1    9.89    1.35 
  24   0   1   -0.11    0.70 
 -24   0  -1    0.18    0.36 
  24   0   1    0.54    0.94 
 -24   0  -1    0.75    0.41 
  25   0   1   -0.28    0.82 
 -25   0  -1    0.77    0.42 
  25   0   1    0.10    0.65 
  25  -1  -1    0.40    0.97 
  25  -1  -1   -0.35    0.78 
 -25  -1   1    0.17    0.35 
  25   1  -1    0.65    0.57 
  25   1  -1    0.16    0.88 
  25   1  -1    1.33    0.85 
 -25   1   1   -0.27    0.38 
 -25   1   1    0.20    0.38 
 -24  -1   1    1.99    0.55 
  24  -1  -1    5.34    1.43 
  24  -1  -1    1.87    0.88 
 -24   1   1    2.54    0.68 
  24   1  -1    1.92    0.65 
 -24   1   1    2.27    0.62 
  24   1  -1    2.88    0.92 
  24   1  -1    0.83    0.88 
  23  -1  -1    0.63    0.92 
  23  -1  -1    0.59    0.72 
 -23  -1   1   -0.09    0.28 
 -23   1   1   -0.01    0.35 
 -23   1   1   -0.06    0.32 
  23   1  -1   -0.27    0.56 
  23   1  -1   -0.53    0.37 
  23   1  -1    0.84    0.81 
 -22  -1   1    0.61    0.44 
  22  -1  -1   -0.47    0.47 
 -22  -1   1    1.41    0.42 
  22  -1  -1   -0.27    0.80 
  22   1  -1    0.94    0.63 
  22   1  -1    0.26    0.46 
  22   1  -1    0.78    0.84 
 -22   1   1    1.17    0.43 
 -22   1   1    1.46    0.47 
  21  -1  -1    0.71    0.75 
 -21  -1   1    0.35    0.30 
  21  -1  -1   -0.26    0.35 
 -21  -1   1    0.44    0.40 
  21  -1  -1    0.48    0.58 
  21   1  -1   -0.02    0.43 
  21   1  -1    0.41    0.69 
  21   1  -1    0.55    0.47 
 -21   1   1    0.44    0.33 
 -21   1   1   -0.35    0.30 
 -20  -1   1   13.82    1.45 
  20  -1  -1    7.44    1.78 
 -20  -1   1   13.64    1.52 
 -20  -1   1   13.75    1.57 
  20  -1  -1   12.86    1.88 
  20  -1  -1   12.26    1.52 
  20   1  -1    9.32    1.64 
 -20   1   1   11.75    1.53 
  20   1  -1   11.44    2.01 
  20   1  -1   11.93    1.60 
 -20   1   1   10.91    1.53 
  20   1  -1   11.44    1.42 
 -19  -1   1    0.10    0.28 
  19  -1  -1    0.35    0.34 
 -19  -1   1   -0.25    0.25 
 -19  -1   1    0.12    0.31 
  19  -1  -1    0.03    0.41 
 -19  -1   1   -0.06    0.22 
  19  -1  -1   -0.13    0.54 
  19   1  -1   -0.40    0.34 
 -19   1   1    0.14    0.28 
  19   1  -1    0.34    0.28 
 -19   1   1   -0.24    0.24 
  19   1  -1   -0.31    0.50 
  19   1  -1    0.56    0.44 
 -18  -1   1    0.80    0.30 
  18  -1  -1    0.60    0.47 
 -18  -1   1    0.36    0.31 
  18  -1  -1    0.11    0.30 
 -18  -1   1    0.75    0.35 
  18  -1  -1    1.07    0.66 
 -18  -1   1    0.52    0.31 
 -18   1   1    0.68    0.33 
 -18   1   1    0.65    0.34 
  18   1  -1    0.61    0.42 
  18   1  -1    0.69    0.31 
  18   1  -1    1.12    0.66 
  18   1  -1    0.43    0.36 
 -17  -1   1    2.88    0.54 
 -17  -1   1    3.63    0.63 
 -17  -1   1    2.73    0.58 
  17  -1  -1    2.97    0.74 
  17  -1  -1    2.76    0.46 
  17  -1  -1    3.10    0.59 
  17  -1  -1    2.37    0.81 
 -17  -1   1    3.23    0.52 
  17   1  -1    3.66    0.71 
  17   1  -1    2.85    0.69 
  17   1  -1    3.87    0.59 
 -17   1   1    1.22    0.46 
 -17   1   1    2.59    0.54 
  17   1  -1    2.26    0.78 
 -17   1   1    3.12    0.46 
 -16  -1   1   10.80    1.26 
  16  -1  -1    6.20    1.34 
 -16  -1   1    9.96    1.12 
 -16  -1   1   10.16    1.19 
  16  -1  -1   10.54    1.11 
  16  -1  -1    9.21    1.28 
  16  -1  -1    7.78    1.53 
 -16  -1   1   11.69    1.31 
 -16  -1   1   10.04    1.36 
  16   1  -1   10.99    1.66 
  16   1  -1    9.31    1.20 
 -16   1   1   10.54    1.15 
  16   1  -1    8.56    1.31 
  16   1  -1   12.41    1.36 
 -16   1   1    9.46    1.32 
 -16   1   1   11.82    1.31 
 -16   1   1   12.09    1.25 
 -15  -1   1    2.76    0.58 
 -15  -1   1    2.56    0.43 
  15  -1  -1    3.41    0.62 
 -15  -1   1    3.80    0.59 
 -15  -1   1    3.87    0.63 
 -15  -1   1    2.59    0.49 
  15  -1  -1    3.22    0.48 
  15  -1  -1    4.60    0.77 
  15  -1  -1    3.20    0.82 
  15   1  -1    3.57    0.88 
 -15   1   1    3.85    0.62 
  15   1  -1    3.44    0.57 
 -15   1   1    3.63    0.48 
 -15   1   1    2.68    0.54 
 -15   1   1    3.58    0.53 
 -15   1   1    3.30    0.60 
  15   1  -1    2.01    0.55 
  15   1  -1    3.32    0.64 
 -14  -1   1    6.55    1.08 
 -14  -1   1    7.28    0.88 
  14  -1  -1    7.49    0.87 
  14  -1  -1    8.92    1.20 
  14  -1  -1    7.30    1.28 
  14  -1  -1    8.93    1.04 
 -14  -1   1    6.61    0.91 
 -14  -1   1   10.86    1.07 
  14  -1  -1    9.12    1.07 
 -14   1   1    8.58    1.02 
 -14   1   1    9.94    1.01 
 -14   1   1    7.10    0.93 
  14   1  -1    6.53    1.25 
  14   1  -1    7.83    1.09 
  14   1  -1    7.19    0.96 
 -14   1   1   10.05    1.07 
  14   1  -1    5.56    1.02 
 -14   1   1    7.79    0.90 
 -13  -1   1   21.20    2.30 
  13  -1  -1   24.63    2.55 
 -13  -1   1   22.42    2.33 
  13  -1  -1   21.85    2.62 
 -13  -1   1   27.47    2.38 
 -13  -1   1   23.30    2.50 
  13  -1  -1   22.28    2.30 
  13  -1  -1   23.70    2.23 
 -13  -1   1   21.94    2.66 
  13  -1  -1   23.20    2.53 
  13   1  -1   24.99    2.59 
 -13   1   1   25.86    2.54 
 -13   1   1   21.95    2.35 
  13   1  -1   21.03    2.27 
  13   1  -1   16.46    2.42 
  13   1  -1   19.17    2.59 
 -13   1   1   23.37    2.24 
 -13   1   1   21.62    2.39 
 -13   1   1   24.53    2.53 
 -13   1   1   20.25    2.64 
  13   1  -1   20.75    2.34 
 -12  -1   1   18.56    2.26 
 -12  -1   1   22.40    2.44 
  12  -1  -1   25.83    2.34 
 -12  -1   1   19.68    2.12 
 -12  -1   1   20.01    2.15 
  12  -1  -1   21.33    2.03 
 -12  -1   1   20.89    2.12 
 -12  -1   1   18.03    2.30 
  12  -1  -1   24.00    2.33 
  12  -1  -1   21.49    2.10 
  12  -1  -1   19.13    2.37 
 -12   1   1   18.20    2.17 
 -12   1   1   16.13    2.38 
  12   1  -1   19.59    2.07 
  12   1  -1   19.57    2.33 
 -12   1   1   21.81    2.15 
 -12   1   1   22.77    2.31 
  12   1  -1   18.74    2.14 
 -12   1   1   19.38    2.03 
  12   1  -1   27.10    2.30 
  12   1  -1   21.23    2.41 
  11  -1  -1    0.86    0.35 
  11  -1  -1    1.71    0.28 
 -11  -1   1    1.78    0.36 
 -11  -1   1    1.34    0.35 
 -11  -1   1    0.89    0.22 
  11  -1  -1    1.38    0.34 
  11  -1  -1    1.26    0.30 
  11  -1  -1    1.07    0.48 
 -11  -1   1    2.57    0.34 
 -11  -1   1    1.35    0.33 
 -11  -1   1    0.76    0.28 
 -11   1   1    1.38    0.25 
 -11   1   1    1.60    0.28 
  11   1  -1    1.37    0.31 
  11   1  -1    1.15    0.33 
 -11   1   1    1.72    0.35 
 -11   1   1    1.88    0.34 
  11   1  -1    1.94    0.38 
  11   1  -1    1.66    0.40 
 -11   1   1    1.74    0.32 
  11   1  -1    2.44    0.58 
  10  -1  -1    1.20    0.33 
  10  -1  -1    0.68    0.24 
  10  -1  -1    0.77    0.40 
 -10  -1   1    1.07    0.27 
 -10  -1   1    1.54    0.32 
 -10  -1   1    0.61    0.17 
 -10  -1   1    0.92    0.28 
  10  -1  -1    0.54    0.18 
 -10  -1   1    0.31    0.18 
  10  -1  -1    0.47    0.19 
  10   1  -1    0.79    0.26 
 -10   1   1    1.24    0.28 
  10   1  -1    1.12    0.31 
 -10   1   1    1.06    0.24 
 -10   1   1    0.83    0.22 
 -10   1   1    0.61    0.19 
  10   1  -1    0.66    0.36 
  10   1  -1    1.02    0.15 
  10   1  -1    0.46    0.22 
 -10   1   1    0.81    0.19 
   9  -1  -1   37.74    4.01 
   9  -1  -1   41.19    3.72 
   9  -1  -1   38.60    4.35 
   9  -1  -1   36.31    4.04 
  -9  -1   1   34.85    3.88 
  -9  -1   1   44.45    4.38 
  -9  -1   1   39.99    3.55 
  -9  -1   1   37.51    4.15 
   9  -1  -1   38.58    3.65 
   9  -1  -1   35.89    4.13 
  -9  -1   1   43.61    4.08 
  -9  -1   1   39.64    3.73 
  -9   1   1   40.05    3.89 
   9   1  -1   38.43    3.70 
  -9   1   1   40.66    4.36 
  -9   1   1   41.98    4.14 
  -9   1   1   35.71    3.65 
   9   1  -1   33.01    4.15 
   9   1  -1   33.87    3.52 
   9   1  -1   40.18    3.77 
   9   1  -1   44.47    4.08 
   9   1  -1   33.77    3.89 
  -8  -1   1    0.43    0.12 
   8  -1  -1    0.32    0.14 
  -8  -1   1    0.17    0.17 
   8  -1  -1    0.33    0.16 
   8  -1  -1    0.31    0.27 
   8  -1  -1    0.36    0.13 
  -8  -1   1    0.54    0.12 
  -8  -1   1    0.57    0.17 
  -8  -1   1    0.21    0.16 
  -8  -1   1    0.49    0.17 
   8  -1  -1    0.18    0.12 
   8  -1  -1   -0.17    0.14 
   8   1  -1    0.44    0.13 
  -8   1   1    0.41    0.13 
  -8   1   1    0.74    0.17 
   8   1  -1    0.37    0.09 
  -8   1   1    0.68    0.16 
   8   1  -1    0.10    0.14 
   8   1  -1    0.46    0.29 
   8   1  -1    0.63    0.20 
  -8   1   1    0.39    0.14 
   8   1  -1    0.39    0.21 
  -7  -1   1   22.50    2.48 
  -7  -1   1   20.71    2.30 
   7  -1  -1   21.27    2.39 
   7  -1  -1   18.73    2.44 
   7  -1  -1   22.56    2.43 
  -7  -1   1   22.72    2.11 
  -7  -1   1   22.29    2.43 
   7  -1  -1   25.73    2.07 
  -7  -1   1   19.66    2.59 
   7  -1  -1   21.01    2.57 
   7  -1  -1   22.60    2.21 
  -7  -1   1   26.30    2.46 
  -7  -1   1   22.99    2.23 
   7  -1  -1   23.39    2.17 
   7  -1  -1   23.70    2.07 
  -7   1   1   23.18    2.45 
   7   1  -1   21.75    2.21 
  -7   1   1   20.91    2.58 
   7   1  -1   24.90    2.27 
   7   1  -1   24.89    2.49 
   7   1  -1   22.21    2.10 
   7   1  -1   20.74    2.42 
  -7   1   1   21.82    2.31 
  -7   1   1   25.54    2.18 
   6  -1  -1   14.34    1.37 
   6  -1  -1   12.90    1.63 
  -6  -1   1   14.34    1.41 
  -6  -1   1   17.29    1.55 
   6  -1  -1   14.41    1.37 
   6  -1  -1   14.88    1.45 
   6  -1  -1   15.48    1.48 
  -6  -1   1   14.89    1.63 
  -6  -1   1   18.35    1.68 
   6  -1  -1   14.95    1.63 
   6  -1  -1   15.88    1.62 
  -6  -1   1   14.95    1.74 
   6  -1  -1   16.50    1.72 
  -6  -1   1   14.78    1.50 
   6   1  -1   13.99    1.49 
  -6   1   1   15.08    1.54 
  -6   1   1   11.59    1.71 
   6   1  -1   14.21    1.40 
  -6   1   1   16.94    1.49 
  -6   1   1   15.96    1.64 
  -6   1   1   14.31    1.44 
   6   1  -1   13.52    1.63 
   6   1  -1   16.22    1.67 
   6   1  -1   14.04    1.52 
  -5  -1   1   10.54    0.97 
  -5  -1   1   10.58    1.06 
   5  -1  -1    9.08    0.98 
   5  -1  -1    9.79    1.03 
   5  -1  -1    9.81    1.07 
  -5  -1   1    9.98    0.90 
  -5  -1   1    9.85    1.04 
  -5  -1   1    7.00    0.96 
   5  -1  -1    9.41    0.91 
   5  -1  -1    9.08    1.03 
  -5  -1   1    8.07    1.03 
  -5  -1   1   10.34    1.10 
   5  -1  -1    9.89    0.94 
   5  -1  -1    9.52    1.07 
   5   1  -1    8.83    0.88 
   5   1  -1   10.63    1.07 
  -5   1   1    8.18    1.02 
   5   1  -1    8.85    0.98 
  -5   1   1    9.51    0.93 
   5   1  -1   11.15    1.11 
  -5   1   1    7.42    1.07 
   5   1  -1    8.86    1.05 
  -5   1   1    9.49    0.90 
   5   1  -1    8.64    0.95 
  -5   1   1    9.26    0.97 
   4  -1  -1  130.66   12.81 
   4  -1  -1  107.94   11.48 
   4  -1  -1  109.00   12.13 
   4  -1  -1  129.57   10.72 
  -4  -1   1  120.05   10.49 
  -4  -1   1   97.00   11.47 
  -4  -1   1  130.98   11.89 
   4  -1  -1  114.10   10.81 
  -4  -1   1  110.00   10.76 
  -4  -1   1  118.42   12.16 
   4  -1  -1  116.01   11.49 
  -4   1   1  112.48   10.80 
   4   1  -1  106.34   11.47 
   4   1  -1  100.93   12.16 
  -4   1   1  104.62   12.13 
   4   1  -1  129.87   10.49 
  -4   1   1  103.38   10.71 
   4   1  -1  118.47   10.85 
   4   1  -1  116.49   10.76 
   4   1  -1  127.13   11.50 
  -3  -1   1   46.76    5.55 
  -3  -1   1   50.90    4.98 
  -3  -1   1   53.88    5.22 
  -3  -1   1   45.23    4.71 
   3  -1  -1   53.67    5.05 
   3  -1  -1   52.26    4.97 
   3  -1  -1   47.82    4.98 
  -3  -1   1   47.96    4.54 
   3  -1  -1   48.28    4.67 
   3  -1  -1   44.19    4.63 
  -3  -1   1   41.90    4.96 
  -3  -1   1   47.42    4.67 
  -3  -1   1   46.81    5.27 
  -3  -1   1   58.85    5.17 
   3  -1  -1   46.88    5.24 
  -3   1   1   50.56    4.98 
   3   1  -1   54.04    5.23 
  -3   1   1   57.89    5.05 
  -3   1   1   42.63    5.24 
  -3   1   1   48.60    5.53 
   3   1  -1   56.15    4.99 
  -3   1   1   48.57    4.67 
  -3   1   1   53.93    4.63 
   3   1  -1   50.48    4.54 
   3   1  -1   47.06    4.71 
   3   1  -1   52.25    4.68 
  -2  -1   1   11.97    1.15 
  -2  -1   1   12.00    1.10 
  -2  -1   1   10.94    1.25 
  -2  -1   1   10.47    1.27 
   2  -1  -1   10.85    1.22 
   2  -1  -1   11.74    1.20 
  -2  -1   1   11.54    1.14 
  -2  -1   1   11.28    1.19 
   2  -1  -1   11.69    1.24 
   2   1  -1   11.12    1.20 
   2   1  -1   12.31    1.21 
   2   1  -1    9.74    1.09 
  -2   1   1   11.77    1.20 
   2   1  -1   11.98    1.25 
   2   1  -1   11.08    1.14 
   2   1  -1   11.74    1.15 
   2   1  -1   13.57    1.28 
  -2   1   1   11.86    1.22 
  -2   1   1   11.33    1.24 
   2   1  -1   12.96    1.28 
   2   1  -1   11.01    1.33 
  -1  -1   1    2.83    0.27 
  -1  -1   1    1.96    0.28 
  -1  -1   1    1.61    0.27 
   1  -1  -1    1.76    0.27 
  -1  -1   1    2.72    0.27 
  -1  -1   1    1.99    0.27 
  -1  -1   1    2.33    0.31 
  -1  -1   1    1.81    0.28 
  -1  -1   1    2.20    0.25 
   1  -1  -1    2.71    0.27 
   1  -1  -1    2.35    0.25 
   1  -1  -1    2.42    0.28 
   1  -1  -1    2.16    0.27 
   1   1  -1    2.33    0.24 
   1   1  -1    2.52    0.30 
   1   1  -1    2.18    0.27 
   1   1  -1    2.49    0.27 
  -1   1   1    2.33    0.27 
   1   1  -1    2.15    0.27 
  -1   1   1    2.42    0.28 
   1   1  -1    2.14    0.28 
   1   1  -1    1.78    0.29 
   0  -1  -1  420.25   38.07 
   0  -1  -1  375.36   42.80 
   0  -1   1  374.00   42.81 
   0  -1  -1  461.63   40.30 
   0  -1   1  435.95   38.08 
   0  -1   1  373.84   45.21 
   0  -1  -1  426.93   42.37 
   0  -1  -1  356.74   41.77 
   0  -1   1  413.26   37.82 
   0  -1   1  384.71   40.50 
   0  -1  -1  397.09   40.86 
   0  -1   1  394.85   36.98 
   0  -1   1  402.38   40.88 
   0  -1   1  449.83   42.38 
   0   1   1  398.13   38.07 
   0   1  -1  456.51   42.38 
   0   1   1  406.70   42.37 
   0   1   1  404.17   40.86 
   0   1  -1  393.67   38.08 
   0   1  -1  399.36   36.98 
   0   1  -1  393.18   40.88 
   0   1  -1  425.02   37.82 
   0   1  -1  404.07   42.82 
  -1  -1  -1  192.40   17.57 
  -1  -1  -1  184.32   18.72 
   1  -1   1  180.33   18.72 
   1  -1   1  200.17   17.55 
  -1  -1  -1  190.12   20.99 
   1  -1   1  190.32   19.88 
  -1  -1  -1  191.37   19.42 
   1  -1   1  179.91   17.66 
   1  -1   1  184.87   19.68 
  -1  -1  -1  160.27   19.88 
   1  -1   1  174.69   20.99 
   1  -1   1  202.41   17.17 
   1  -1   1  191.92   18.81 
  -1  -1  -1  198.62   17.17 
  -1  -1  -1  196.55   17.69 
   1  -1   1  185.17   19.00 
   1   1   1  196.82   17.56 
   1   1   1  200.04   19.42 
   1   1   1  205.29   20.99 
  -1   1  -1  186.08   18.81 
  -1   1  -1  163.04   18.72 
  -1   1  -1  192.07   19.00 
  -1   1  -1  182.59   17.55 
   1   1   1  196.32   17.69 
   1   1   1  190.58   19.88 
  -1   1  -1  179.90   17.17 
   1   1   1  187.96   18.72 
   2  -1   1   23.19    2.48 
   2  -1   1   21.48    2.03 
  -2  -1  -1   19.80    2.09 
  -2  -1  -1   22.36    2.12 
  -2  -1  -1   21.38    2.49 
   2  -1   1   21.97    2.34 
  -2  -1  -1   25.31    2.35 
  -2  -1  -1   21.67    2.36 
  -2  -1  -1   20.16    2.23 
   2  -1   1   22.24    2.36 
  -2  -1  -1   20.46    2.33 
  -2  -1  -1   21.54    2.24 
   2  -1   1   19.30    2.23 
   2  -1   1   20.66    2.24 
   2   1   1   24.66    2.24 
   2   1   1   21.02    2.35 
  -2   1  -1   22.24    2.25 
  -2   1  -1   22.50    2.23 
   2   1   1   21.16    2.11 
   2   1   1   23.27    2.34 
  -2   1  -1   21.34    2.03 
   2   1   1   25.90    2.50 
   2   1   1   21.54    2.09 
  -2   1  -1   22.39    2.28 
   2   1   1   19.77    2.24 
  -3  -1  -1    2.33    0.31 
  -3  -1  -1    1.53    0.26 
   3  -1   1    1.84    0.27 
   3  -1   1    1.71    0.31 
   3  -1   1    1.88    0.27 
  -3  -1  -1    1.58    0.30 
  -3  -1  -1    1.23    0.30 
   3  -1   1    2.13    0.28 
   3  -1   1    1.99    0.21 
  -3  -1  -1    1.54    0.28 
   3  -1   1    1.72    0.21 
  -3  -1  -1    2.07    0.29 
   3  -1   1    1.39    0.30 
  -3  -1  -1    1.88    0.27 
  -3  -1  -1    1.64    0.27 
   3   1   1    2.17    0.34 
  -3   1  -1    1.63    0.32 
  -3   1  -1    2.03    0.27 
  -3   1  -1    1.99    0.32 
   3   1   1    1.91    0.29 
  -3   1  -1    2.02    0.22 
   3   1   1    2.29    0.31 
   3   1   1    2.01    0.28 
  -3   1  -1    1.66    0.27 
  -3   1  -1    1.91    0.21 
   3   1   1    1.66    0.25 
   3   1   1    2.45    0.31 
   3   1   1    2.10    0.27 
  -3   1  -1    1.93    0.27 
   3   1   1    1.72    0.32 
  -4  -1  -1    1.54    0.37 
   4  -1   1    2.49    0.40 
  -4  -1  -1    2.04    0.33 
  -4  -1  -1    2.05    0.28 
  -4  -1  -1    2.06    0.34 
   4  -1   1    2.74    0.44 
   4  -1   1    2.91    0.29 
   4  -1   1    2.30    0.36 
  -4  -1  -1    1.99    0.34 
  -4  -1  -1    2.63    0.36 
   4  -1   1    1.93    0.33 
   4  -1   1    2.68    0.27 
   4  -1   1    3.06    0.26 
  -4  -1  -1    1.98    0.36 
   4   1   1    2.34    0.33 
   4   1   1    2.76    0.37 
   4   1   1    3.38    0.35 
   4   1   1    2.28    0.42 
  -4   1  -1    2.28    0.26 
  -4   1  -1    2.65    0.26 
  -4   1  -1    3.25    0.36 
  -4   1  -1    2.40    0.30 
   4   1   1    1.93    0.36 
  -4   1  -1    1.92    0.33 
  -4   1  -1    2.13    0.33 
   5  -1   1   67.98    6.86 
  -5  -1  -1   83.48    8.01 
   5  -1   1   81.31    7.02 
  -5  -1  -1   76.18    6.87 
  -5  -1  -1   73.83    7.08 
   5  -1   1   79.48    7.10 
   5  -1   1   77.82    7.68 
   5  -1   1   75.41    7.60 
   5  -1   1   73.02    7.98 
  -5  -1  -1   71.90    7.82 
  -5  -1  -1   77.07    8.43 
  -5   1  -1   74.74    7.10 
  -5   1  -1   88.28    8.43 
  -5   1  -1   73.39    7.98 
   5   1   1   63.38    7.06 
  -5   1  -1   69.90    7.55 
   5   1   1   66.55    7.13 
  -5   1  -1   75.29    7.02 
   5   1   1   86.62    7.57 
   5   1   1   80.33    7.61 
  -5   1  -1   66.54    6.85 
   6  -1   1   44.94    4.32 
  -6  -1  -1   37.24    4.32 
   6  -1   1   37.77    3.77 
  -6  -1  -1   42.15    4.09 
   6  -1   1   40.40    3.67 
   6  -1   1   39.79    3.83 
  -6  -1  -1   43.43    4.56 
  -6  -1  -1   39.84    3.84 
  -6  -1  -1   42.51    3.70 
   6  -1   1   39.76    4.17 
  -6  -1  -1   48.75    4.27 
   6   1   1   41.35    3.83 
  -6   1  -1   41.96    4.54 
  -6   1  -1   40.53    3.78 
  -6   1  -1   39.91    3.84 
   6   1   1   38.17    4.33 
   6   1   1   39.80    4.16 
  -6   1  -1   42.92    4.31 
  -6   1  -1   34.31    4.07 
   6   1   1   37.38    3.87 
   6   1   1   33.60    4.08 
   7  -1   1    5.96    0.66 
   7  -1   1    6.70    0.91 
  -7  -1  -1    5.97    0.69 
  -7  -1  -1    5.13    0.70 
   7  -1   1    4.30    0.75 
   7  -1   1    6.84    0.62 
   7  -1   1    5.12    0.72 
  -7  -1  -1    6.08    0.78 
  -7  -1  -1    5.73    0.75 
   7  -1   1    6.52    0.84 
  -7  -1  -1    5.65    0.75 
  -7  -1  -1    5.95    0.60 
   7   1   1    6.49    0.72 
  -7   1  -1    7.01    0.78 
   7   1   1    7.82    0.78 
  -7   1  -1    7.07    0.74 
   7   1   1    5.37    0.74 
  -7   1  -1    5.88    0.69 
   7   1   1    5.08    0.84 
  -7   1  -1    6.41    0.74 
   7   1   1    6.29    0.68 
  -7   1  -1    5.99    0.63 
   8  -1   1   20.90    1.95 
  -8  -1  -1   19.35    2.18 
  -8  -1  -1   20.25    2.16 
   8  -1   1   19.53    1.88 
   8  -1   1   15.26    2.11 
  -8  -1  -1   21.68    2.30 
  -8  -1  -1   18.19    1.95 
  -8  -1  -1   18.90    1.83 
   8  -1   1   19.53    2.19 
   8  -1   1   20.84    2.18 
  -8  -1  -1   23.98    2.08 
   8   1   1   19.16    1.93 
   8   1   1   22.98    2.21 
   8   1   1   19.78    2.00 
   8   1   1   19.50    2.18 
  -8   1  -1   16.10    2.26 
  -8   1  -1   20.00    2.05 
  -8   1  -1   21.36    2.18 
  -8   1  -1   19.33    2.13 
   8   1   1   16.86    2.08 
  -8   1  -1   21.05    1.90 
  -9  -1  -1   27.92    2.82 
   9  -1   1   25.03    2.95 
   9  -1   1   27.27    2.60 
   9  -1   1   24.33    2.97 
  -9  -1  -1   27.29    3.00 
  -9  -1  -1   28.22    2.69 
  -9  -1  -1   29.84    3.16 
  -9  -1  -1   26.03    2.53 
   9  -1   1   26.09    2.92 
   9  -1   1   27.36    2.67 
   9   1   1   30.84    3.00 
   9   1   1   27.92    2.87 
  -9   1  -1   27.22    2.81 
   9   1   1   27.05    2.72 
  -9   1  -1   26.65    2.98 
   9   1   1   25.73    2.65 
  -9   1  -1   27.59    2.92 
  -9   1  -1   26.72    3.13 
  -9   1  -1   27.68    2.62 
   9   1   1   30.45    3.02 
  10  -1   1   26.86    2.97 
  10  -1   1   26.75    2.65 
  10  -1   1   27.91    2.92 
 -10  -1  -1   28.03    3.13 
 -10  -1  -1   30.07    2.94 
  10  -1   1   24.35    2.95 
 -10  -1  -1   22.28    2.95 
 -10  -1  -1   23.64    2.78 
 -10  -1  -1   27.24    2.50 
  10  -1   1   30.34    2.58 
 -10  -1  -1   25.64    2.65 
 -10   1  -1   26.61    2.78 
 -10   1  -1   29.15    2.61 
 -10   1  -1   28.21    2.81 
 -10   1  -1   27.00    2.90 
 -10   1  -1   32.25    3.13 
 -10   1  -1   24.31    2.95 
  10   1   1   23.44    2.93 
  10   1   1   25.10    2.85 
  10   1   1   32.55    3.01 
  10   1   1   27.23    2.63 
  10   1   1   23.08    2.68 
  11  -1   1   -0.07    0.09 
 -11  -1  -1    0.02    0.17 
  11  -1   1    0.18    0.25 
  11  -1   1    0.42    0.38 
 -11  -1  -1   -0.09    0.10 
  11  -1   1   -0.07    0.15 
 -11  -1  -1    0.10    0.17 
 -11  -1  -1    0.22    0.20 
 -11  -1  -1   -0.03    0.12 
 -11  -1  -1   -0.10    0.15 
  11  -1   1    0.17    0.18 
  11   1   1    0.00    0.19 
 -11   1  -1   -0.09    0.11 
  11   1   1   -0.09    0.15 
  11   1   1   -0.12    0.12 
  11   1   1    0.07    0.32 
 -11   1  -1   -0.25    0.10 
 -11   1  -1    0.16    0.19 
  11   1   1    0.10    0.23 
 -11   1  -1    0.18    0.17 
 -11   1  -1    0.08    0.14 
 -11   1  -1   -0.34    0.12 
 -12  -1  -1    3.65    0.44 
  12  -1   1    2.89    0.54 
 -12  -1  -1    3.56    0.52 
 -12  -1  -1    3.95    0.60 
 -12  -1  -1    3.21    0.60 
  12  -1   1    3.83    0.54 
 -12  -1  -1    2.81    0.56 
 -12  -1  -1    4.35    0.63 
 -12  -1  -1    4.95    0.58 
  12  -1   1    3.15    0.44 
  12  -1   1    3.33    0.69 
  12  -1   1    3.21    0.74 
 -12   1  -1    3.50    0.57 
  12   1   1    3.97    0.62 
 -12   1  -1    4.05    0.51 
 -12   1  -1    3.83    0.54 
 -12   1  -1    4.36    0.63 
  12   1   1    3.52    0.76 
  12   1   1    2.86    0.48 
  12   1   1    3.49    0.62 
 -12   1  -1    4.16    0.61 
 -12   1  -1    3.78    0.59 
 -12   1  -1    3.65    0.59 
  12   1   1    3.43    0.59 
 -13  -1  -1   25.02    2.72 
 -13  -1  -1   25.09    2.90 
  13  -1   1   25.38    2.75 
  13  -1   1   22.95    2.75 
 -13  -1  -1   24.38    2.49 
 -13  -1  -1   30.53    2.33 
  13  -1   1   20.79    2.79 
  13  -1   1   23.99    2.47 
 -13  -1  -1   25.09    2.55 
 -13  -1  -1   28.04    2.79 
 -13  -1  -1   29.99    2.60 
  13  -1   1   27.12    2.39 
 -13   1  -1   23.71    2.59 
  13   1   1   26.04    2.45 
 -13   1  -1   19.70    2.72 
  13   1   1   20.57    2.49 
  13   1   1   22.01    2.77 
 -13   1  -1   21.27    2.87 
  13   1   1   22.75    2.81 
 -13   1  -1   24.23    2.57 
 -13   1  -1   24.86    2.42 
 -13   1  -1   24.19    2.74 
  13   1   1   22.23    2.67 
 -14  -1  -1   13.21    1.52 
  14  -1   1   15.69    1.52 
 -14  -1  -1   14.64    1.55 
  14  -1   1   14.73    1.74 
  14  -1   1   14.08    1.97 
 -14  -1  -1   15.40    1.67 
 -14  -1  -1   11.63    1.66 
  14  -1   1   12.14    1.40 
 -14  -1  -1   14.16    1.75 
 -14  -1  -1   13.88    1.53 
  14   1   1   12.79    1.95 
  14   1   1   13.25    1.65 
 -14   1  -1   15.48    1.55 
  14   1   1   16.90    1.59 
  14   1   1   12.24    1.46 
 -14   1  -1   15.34    1.67 
 -14   1  -1   15.98    1.60 
 -14   1  -1   13.54    1.73 
 -14   1  -1   14.24    1.46 
  15  -1   1    0.94    0.45 
 -15  -1  -1    0.74    0.32 
  15  -1   1    0.67    0.20 
 -15  -1  -1    0.81    0.27 
 -15  -1  -1    0.80    0.25 
  15  -1   1    0.85    0.54 
  15  -1   1    0.34    0.27 
 -15  -1  -1    0.37    0.30 
  15   1   1    0.68    0.36 
  15   1   1    0.58    0.25 
  15   1   1    0.32    0.28 
 -15   1  -1    0.69    0.23 
 -15   1  -1    0.32    0.25 
 -15   1  -1    0.41    0.23 
  15   1   1    1.87    0.69 
 -15   1  -1    0.53    0.29 
 -15   1  -1    0.53    0.28 
 -16  -1  -1    1.14    0.38 
  16  -1   1    1.64    0.54 
 -16  -1  -1    1.96    0.48 
  16  -1   1    1.43    0.40 
  16  -1   1    1.32    0.28 
  16  -1   1    1.46    0.65 
 -16  -1  -1    1.09    0.34 
 -16  -1  -1    1.88    0.33 
  16   1   1    0.95    0.43 
  16   1   1    0.92    0.33 
 -16   1  -1    1.21    0.38 
  16   1   1    0.95    0.59 
 -16   1  -1    1.30    0.39 
 -16   1  -1    1.53    0.41 
  16   1   1    0.72    0.35 
 -16   1  -1    1.30    0.33 
 -17  -1  -1    2.55    0.60 
  17  -1   1    3.84    0.99 
 -17  -1  -1    2.75    0.49 
  17  -1   1    2.70    0.45 
 -17  -1  -1    3.89    0.60 
  17  -1   1    2.32    0.54 
  17  -1   1    4.67    0.89 
 -17  -1  -1    3.67    0.67 
 -17   1  -1    3.18    0.63 
  17   1   1    4.67    0.71 
 -17   1  -1    2.82    0.56 
 -17   1  -1    3.71    0.56 
  17   1   1    2.81    0.52 
  17   1   1    4.51    1.00 
 -17   1  -1    3.37    0.64 
  17   1   1    3.61    0.73 
  18  -1   1   -0.07    0.39 
 -18  -1  -1   -0.22    0.22 
 -18  -1  -1    0.61    0.28 
 -18  -1  -1    0.24    0.29 
  18  -1   1    1.01    0.64 
  18  -1   1    0.15    0.28 
 -18  -1  -1    0.07    0.26 
 -18   1  -1    0.20    0.24 
 -18   1  -1   -0.18    0.26 
 -18   1  -1    0.30    0.27 
  18   1   1    0.08    0.50 
  18   1   1    0.11    0.36 
  18   1   1    0.07    0.41 
  18   1   1    0.07    0.24 
 -19  -1  -1    0.72    0.30 
 -19  -1  -1    0.32    0.37 
 -19  -1  -1    0.96    0.40 
 -19  -1  -1    0.39    0.29 
  19  -1   1    1.03    0.38 
  19  -1   1   -0.02    0.49 
  19  -1   1    0.41    0.61 
  19   1   1    0.04    0.32 
  19   1   1    0.54    0.48 
 -19   1  -1    0.18    0.29 
  19   1   1   -0.26    0.52 
 -19   1  -1    0.29    0.33 
  19   1   1    0.70    0.32 
  20  -1   1    1.91    0.48 
  20  -1   1    1.04    0.62 
 -20  -1  -1    2.09    0.50 
 -20  -1  -1    1.79    0.52 
 -20  -1  -1    1.05    0.36 
  20  -1   1   -0.03    0.59 
  20   1   1    0.16    0.40 
  20   1   1    1.42    0.74 
  20   1   1    0.56    0.48 
 -20   1  -1    1.11    0.44 
  20   1   1    0.38    0.39 
 -20   1  -1    2.52    0.55 
 -21  -1  -1    1.16    0.51 
 -21  -1  -1    1.63    0.45 
  21  -1   1    1.64    0.84 
  21  -1   1    2.22    0.53 
 -21  -1  -1    1.76    0.54 
  21  -1   1    1.08    0.65 
  21   1   1    1.71    0.52 
  21   1   1    0.30    0.49 
 -21   1  -1    2.37    0.55 
 -21   1  -1    2.43    0.57 
  21   1   1    1.66    0.83 
 -22  -1  -1    5.54    0.99 
  22  -1   1    3.47    1.18 
 -22  -1  -1    6.70    0.89 
 -22  -1  -1    4.17    0.84 
  22  -1   1    3.94    1.11 
 -22   1  -1    4.69    0.85 
 -22   1  -1    4.66    0.88 
  22   1   1    6.17    1.47 
  22   1   1    3.96    1.07 
  22   1   1    4.40    0.88 
  23  -1   1    2.79    1.16 
 -23  -1  -1    0.03    0.40 
 -23  -1  -1    0.73    0.35 
  23  -1   1   -0.18    0.72 
 -23   1  -1    1.44    0.47 
  23   1   1   -0.09    0.62 
 -23   1  -1    0.82    0.39 
  23   1   1    1.19    0.57 
  23   1   1    0.74    0.85 
  24  -1   1    1.36    1.05 
 -24  -1  -1    2.07    0.55 
  24  -1   1    2.77    1.06 
  24   1   1    1.44    1.19 
  24   1   1    0.60    0.59 
 -24   1  -1    2.77    0.69 
 -24   1  -1    1.42    0.54 
  24   1   1    2.05    0.83 
  25  -1   1   -0.03    0.87 
  25  -1   1   -0.60    0.62 
 -25  -1  -1   -0.02    0.33 
 -25   1  -1   -0.21    0.42 
  25   1   1    0.15    0.62 
 -25   1  -1    1.16    0.53 
  25   1   1   -0.66    0.83 
  25   1   1    0.90    0.60 
 -25  -2   1    0.64    0.38 
 -25  -2   1    0.46    0.48 
  25  -2  -1    0.64    0.83 
  25  -2  -1    0.09    0.90 
  25   2  -1    0.18    0.71 
  25   2  -1    1.15    0.64 
  25   2  -1    2.24    1.22 
 -25   2   1    1.65    0.59 
 -25   2   1    0.96    0.51 
 -24  -2   1    2.95    0.80 
  24  -2  -1    2.50    1.03 
 -24  -2   1    3.13    0.64 
  24  -2  -1    5.19    1.55 
 -24   2   1    3.87    0.78 
  24   2  -1    3.78    0.95 
  24   2  -1    1.42    1.04 
 -24   2   1    2.21    0.66 
  24   2  -1    3.02    0.81 
  23  -2  -1    4.94    1.37 
 -23  -2   1    6.39    0.90 
 -23  -2   1    6.80    1.10 
  23  -2  -1    6.71    1.38 
  23   2  -1    4.39    1.08 
  23   2  -1    6.38    1.51 
 -23   2   1    4.55    0.92 
 -23   2   1    4.06    0.85 
  23   2  -1    5.76    1.03 
 -22  -2   1    1.22    0.43 
  22  -2  -1    0.59    0.82 
  22  -2  -1    0.22    0.66 
 -22  -2   1    1.93    0.58 
  22   2  -1    2.97    0.70 
  22   2  -1    1.80    0.85 
 -22   2   1    1.27    0.48 
 -22   2   1    1.15    0.49 
  22   2  -1    1.84    0.68 
 -21  -2   1    7.48    1.06 
  21  -2  -1    7.66    1.47 
 -21  -2   1    6.90    1.17 
  21  -2  -1    7.97    1.61 
 -21   2   1    7.82    1.16 
  21   2  -1    9.83    1.40 
 -21   2   1    7.46    1.16 
  21   2  -1    8.33    1.24 
  21   2  -1    7.63    1.08 
  21   2  -1    6.71    1.53 
  20  -2  -1    8.56    1.48 
 -20  -2   1    9.64    1.30 
 -20  -2   1   10.77    1.08 
  20  -2  -1    5.66    1.43 
 -20   2   1    6.86    1.18 
  20   2  -1    6.44    1.17 
  20   2  -1    8.30    1.31 
  20   2  -1    7.14    1.49 
  20   2  -1    8.50    1.12 
 -20   2   1    6.72    1.13 
 -19  -2   1    2.67    0.62 
 -19  -2   1    1.88    0.55 
 -19  -2   1    2.87    0.53 
  19  -2  -1    2.48    0.77 
  19  -2  -1    3.18    0.59 
  19  -2  -1    2.05    0.81 
  19   2  -1    2.81    0.72 
  19   2  -1    3.35    0.60 
  19   2  -1    1.95    0.83 
  19   2  -1    2.54    0.70 
 -19   2   1    3.01    0.63 
 -19   2   1    1.96    0.57 
  18  -2  -1    0.38    0.31 
 -18  -2   1    0.55    0.27 
  18  -2  -1    0.10    0.55 
  18  -2  -1    0.63    0.49 
 -18  -2   1    0.31    0.34 
 -18  -2   1    0.49    0.32 
  18   2  -1    0.55    0.40 
 -18   2   1    0.27    0.29 
 -18   2   1    0.36    0.27 
  18   2  -1    0.49    0.34 
  18   2  -1    0.86    0.65 
  18   2  -1    0.26    0.38 
  17  -2  -1   -0.32    0.24 
 -17  -2   1    0.17    0.29 
 -17  -2   1    0.11    0.20 
  17  -2  -1    0.11    0.46 
 -17  -2   1   -0.02    0.26 
  17  -2  -1    0.29    0.51 
 -17   2   1    0.37    0.30 
  17   2  -1   -0.15    0.31 
 -17   2   1    0.15    0.26 
  17   2  -1   -0.48    0.31 
  17   2  -1   -0.08    0.26 
  17   2  -1    0.18    0.50 
 -16  -2   1    2.08    0.50 
 -16  -2   1    1.16    0.32 
 -16  -2   1    0.87    0.34 
  16  -2  -1    0.61    0.55 
  16  -2  -1    2.25    0.64 
  16  -2  -1    2.42    0.45 
  16  -2  -1    1.69    0.29 
  16   2  -1    1.43    0.40 
  16   2  -1    0.67    0.40 
  16   2  -1    1.84    0.50 
 -16   2   1    1.20    0.39 
  16   2  -1    1.48    0.68 
 -16   2   1    1.70    0.45 
  15  -2  -1   48.80    4.62 
 -15  -2   1   50.11    4.81 
  15  -2  -1   46.19    5.13 
 -15  -2   1   45.25    4.79 
 -15  -2   1   48.46    5.45 
  15  -2  -1   47.10    4.48 
  15  -2  -1   48.31    5.10 
 -15  -2   1   48.74    5.07 
 -15   2   1   49.71    4.88 
 -15   2   1   51.42    5.14 
  15   2  -1   46.43    4.72 
 -15   2   1   40.15    5.38 
  15   2  -1   42.56    5.11 
  15   2  -1   54.46    4.64 
  15   2  -1   41.32    4.95 
 -14  -2   1   21.29    2.07 
  14  -2  -1   17.94    1.91 
  14  -2  -1   20.17    2.02 
 -14  -2   1   17.29    2.03 
 -14  -2   1   22.56    2.39 
 -14  -2   1   25.39    2.27 
  14  -2  -1   19.79    2.38 
  14  -2  -1   18.73    2.27 
  14  -2  -1   18.52    2.21 
  14   2  -1   20.17    2.13 
  14   2  -1   17.69    2.16 
 -14   2   1   18.91    2.22 
  14   2  -1   19.82    2.53 
 -14   2   1   16.96    2.31 
 -14   2   1   22.55    1.93 
  14   2  -1   19.39    2.04 
 -14   2   1   18.43    2.12 
 -13  -2   1    1.77    0.35 
  13  -2  -1    2.53    0.42 
  13  -2  -1    2.48    0.32 
  13  -2  -1    1.53    0.49 
  13  -2  -1    1.47    0.36 
  13  -2  -1    1.38    0.56 
 -13  -2   1    1.94    0.43 
 -13  -2   1    2.17    0.46 
 -13  -2   1    2.25    0.34 
 -13  -2   1    1.88    0.42 
  13   2  -1    1.04    0.44 
 -13   2   1    2.38    0.31 
 -13   2   1    1.61    0.38 
  13   2  -1    1.42    0.37 
 -13   2   1    1.79    0.42 
  13   2  -1    1.17    0.56 
 -13   2   1    2.35    0.46 
  12  -2  -1    0.66    0.26 
  12  -2  -1    2.01    0.27 
  12  -2  -1    1.77    0.33 
 -12  -2   1    1.08    0.31 
 -12  -2   1    1.21    0.27 
  12  -2  -1    0.65    0.43 
 -12  -2   1    1.83    0.40 
 -12  -2   1    1.36    0.34 
 -12  -2   1    0.99    0.24 
  12  -2  -1    1.96    0.50 
  12   2  -1    1.46    0.57 
 -12   2   1    1.93    0.40 
 -12   2   1    1.53    0.36 
 -12   2   1    1.40    0.24 
  12   2  -1    1.85    0.44 
  12   2  -1    1.29    0.40 
 -12   2   1    1.50    0.32 
  12   2  -1    0.99    0.32 
 -11  -2   1    3.20    0.53 
  11  -2  -1    2.74    0.47 
 -11  -2   1    3.02    0.54 
 -11  -2   1    2.66    0.51 
  11  -2  -1    2.98    0.39 
 -11  -2   1    3.09    0.44 
 -11  -2   1    2.94    0.52 
 -11  -2   1    3.41    0.54 
  11  -2  -1    2.42    0.62 
  11  -2  -1    3.50    0.48 
  11  -2  -1    2.56    0.59 
 -11   2   1    3.90    0.54 
  11   2  -1    4.31    0.63 
  11   2  -1    2.77    0.49 
  11   2  -1    2.30    0.61 
  11   2  -1    2.85    0.37 
 -11   2   1    2.64    0.50 
 -11   2   1    3.29    0.54 
 -11   2   1    2.92    0.38 
 -11   2   1    3.60    0.56 
  11   2  -1    3.51    0.61 
  10  -2  -1    0.93    0.24 
 -10  -2   1    1.27    0.30 
  10  -2  -1    1.51    0.28 
  10  -2  -1    0.94    0.13 
 -10  -2   1    0.84    0.26 
  10  -2  -1    0.89    0.18 
  10  -2  -1    1.25    0.14 
 -10  -2   1    0.80    0.28 
 -10  -2   1    0.52    0.29 
  10  -2  -1    1.25    0.35 
  10  -2  -1    0.70    0.37 
 -10  -2   1    1.76    0.27 
  10  -2  -1    1.59    0.27 
 -10  -2   1    0.76    0.26 
  10   2  -1    1.24    0.37 
 -10   2   1    0.99    0.31 
  10   2  -1    1.14    0.45 
  10   2  -1    1.09    0.19 
 -10   2   1    1.10    0.25 
  10   2  -1    0.64    0.27 
  10   2  -1    0.40    0.23 
 -10   2   1    0.92    0.18 
 -10   2   1    1.59    0.28 
   9  -2  -1   23.01    2.11 
  -9  -2   1   25.18    2.56 
  -9  -2   1   24.36    2.52 
  -9  -2   1   22.49    2.31 
  -9  -2   1   21.63    2.37 
   9  -2  -1   21.11    2.50 
   9  -2  -1   20.73    2.62 
  -9  -2   1   22.83    2.52 
   9  -2  -1   23.05    2.25 
   9  -2  -1   25.28    2.20 
   9  -2  -1   22.13    2.50 
   9  -2  -1   22.35    2.52 
  -9   2   1   26.74    2.52 
  -9   2   1   22.42    2.64 
   9   2  -1   20.23    2.50 
  -9   2   1   22.17    2.41 
   9   2  -1   21.76    2.36 
  -9   2   1   23.92    2.18 
   9   2  -1   19.79    2.55 
   9   2  -1   22.96    2.15 
   9   2  -1   25.74    2.31 
   8  -2  -1    5.82    0.52 
  -8  -2   1    5.26    0.71 
  -8  -2   1    7.53    0.73 
   8  -2  -1    4.72    0.66 
   8  -2  -1    5.35    0.64 
   8  -2  -1    5.00    0.59 
  -8  -2   1    5.26    0.73 
  -8  -2   1    4.07    0.71 
  -8  -2   1    6.60    0.63 
   8  -2  -1    4.94    0.76 
   8  -2  -1    5.08    0.81 
  -8  -2   1    5.18    0.71 
   8  -2  -1    5.26    0.55 
  -8   2   1    5.62    0.65 
   8   2  -1    5.62    0.84 
  -8   2   1    4.96    0.67 
   8   2  -1    4.88    0.67 
   8   2  -1    5.05    0.73 
   8   2  -1    6.07    0.78 
   8   2  -1    5.08    0.55 
  -8   2   1    4.53    0.53 
  -7  -2   1   -0.06    0.10 
  -7  -2   1    0.20    0.17 
   7  -2  -1    0.07    0.17 
  -7  -2   1    0.25    0.14 
  -7  -2   1    0.01    0.12 
   7  -2  -1   -0.06    0.08 
   7  -2  -1    0.08    0.08 
  -7  -2   1   -0.02    0.13 
  -7  -2   1   -0.16    0.12 
   7  -2  -1   -0.01    0.10 
   7  -2  -1    0.10    0.18 
   7  -2  -1    0.08    0.09 
   7  -2  -1    0.03    0.06 
   7   2  -1   -0.16    0.12 
  -7   2   1    0.04    0.05 
   7   2  -1    0.20    0.10 
  -7   2   1    0.20    0.11 
  -7   2   1    0.06    0.09 
   7   2  -1    0.10    0.17 
   7   2  -1    0.07    0.15 
   7   2  -1    0.14    0.20 
  -7   2   1    0.13    0.10 
   6  -2  -1    6.71    0.84 
  -6  -2   1    7.42    0.77 
   6  -2  -1    6.35    0.80 
   6  -2  -1    7.25    0.68 
  -6  -2   1    6.91    0.80 
   6  -2  -1    7.32    0.87 
   6  -2  -1    7.39    0.73 
   6  -2  -1    7.27    0.93 
  -6  -2   1   10.19    0.89 
   6  -2  -1    6.54    0.70 
  -6  -2   1    7.22    0.87 
  -6  -2   1    9.86    0.89 
   6   2  -1    6.18    0.78 
  -6   2   1    8.80    0.86 
   6   2  -1    6.91    0.92 
   6   2  -1    6.61    0.70 
   6   2  -1    6.06    0.85 
  -6   2   1    5.83    0.80 
   6   2  -1    6.15    0.85 
  -6   2   1    6.42    0.71 
  -5  -2   1    6.33    0.79 
  -5  -2   1    6.65    0.74 
   5  -2  -1    5.16    0.81 
  -5  -2   1    7.30    0.80 
   5  -2  -1    5.78    0.74 
   5  -2  -1    6.20    0.64 
   5  -2  -1    6.76    0.66 
   5  -2  -1    5.49    0.77 
   5  -2  -1    6.84    0.64 
  -5  -2   1    7.11    0.82 
  -5  -2   1    7.48    0.83 
   5  -2  -1    6.21    0.83 
   5   2  -1    6.36    0.66 
  -5   2   1    7.05    0.75 
   5   2  -1    6.76    0.76 
   5   2  -1    6.41    0.78 
   5   2  -1    8.35    0.82 
   5   2  -1    6.72    0.73 
  -4  -2   1   20.36    1.99 
  -4  -2   1   16.29    1.94 
   4  -2  -1   15.80    1.68 
   4  -2  -1   20.28    1.94 
   4  -2  -1   15.42    1.70 
  -4  -2   1   17.93    1.77 
   4  -2  -1   19.09    1.67 
   4  -2  -1   18.30    1.88 
  -4  -2   1   16.17    1.87 
   4  -2  -1   17.29    1.91 
   4  -2  -1   17.08    1.95 
   4  -2  -1   18.50    2.03 
  -4  -2   1   16.57    2.06 
   4   2  -1   18.52    1.77 
   4   2  -1   19.99    1.69 
  -4   2   1   18.34    1.93 
   4   2  -1   19.82    1.89 
   4   2  -1   17.62    1.79 
  -3  -2   1    0.44    0.15 
   3  -2  -1    0.47    0.17 
   3  -2  -1    0.39    0.11 
  -3  -2   1    0.56    0.14 
   3  -2  -1    0.48    0.16 
   3  -2  -1    0.63    0.13 
   3  -2  -1    0.59    0.19 
  -3  -2   1    0.61    0.20 
  -3  -2   1    0.82    0.19 
  -3  -2   1    0.44    0.18 
  -3  -2   1    0.60    0.18 
  -3  -2   1    0.56    0.15 
   3  -2  -1    0.69    0.14 
   3   2  -1    0.69    0.18 
  -3   2   1    0.61    0.13 
  -3   2   1    0.61    0.13 
   3   2  -1    0.88    0.20 
   3   2  -1    0.46    0.17 
   3   2  -1    0.65    0.18 
  -3   2   1    0.32    0.15 
   3   2  -1    0.85    0.17 
   3   2  -1    0.48    0.13 
   2  -2  -1   11.59    1.33 
   2  -2  -1   12.56    1.26 
   2  -2  -1   11.37    1.31 
   2  -2  -1   12.14    1.36 
   2  -2  -1   12.12    1.17 
  -2  -2   1    9.63    1.41 
  -2  -2   1   11.86    1.22 
  -2  -2   1   14.23    1.39 
   2  -2  -1   10.85    1.39 
  -2  -2   1   14.57    1.37 
   2  -2  -1   12.06    1.15 
   2   2  -1   10.82    1.16 
   2   2  -1   14.92    1.27 
  -2   2   1   11.86    1.31 
   2   2  -1   11.07    1.22 
  -2   2   1   12.15    1.25 
   2   2  -1   15.35    1.31 
   2   2  -1   11.51    1.21 
   2   2  -1   14.76    1.37 
  -2   2   1   10.39    1.39 
   1  -2  -1   38.55    3.96 
  -1  -2   1   43.98    4.49 
   1  -2  -1   42.35    4.48 
  -1  -2   1   46.98    4.31 
  -1  -2   1   38.22    4.50 
   1  -2  -1   41.71    4.21 
   1  -2  -1   44.63    3.99 
  -1  -2   1   45.84    4.02 
  -1  -2   1   44.59    4.00 
   1   2  -1   41.67    3.99 
   1   2  -1   40.49    4.40 
   1   2  -1   42.46    3.89 
   1   2  -1   42.49    4.02 
  -1   2   1   43.44    4.31 
  -1   2   1   37.78    3.98 
   0  -2   1   27.16    3.18 
   0  -2   1   28.63    3.03 
   0  -2   1   22.39    3.01 
   0  -2   1   26.93    2.67 
   0  -2  -1   24.29    2.87 
   0  -2  -1   27.07    2.66 
   0  -2  -1   25.68    3.00 
   0  -2  -1   28.84    2.96 
   0  -2  -1   30.68    3.01 
   0  -2   1   29.73    2.95 
   0  -2   1   33.22    3.19 
   0  -2   1   29.69    2.68 
   0  -2   1   28.03    2.90 
   0  -2  -1   28.55    2.68 
   0   2   1   26.74    2.67 
   0   2   1   29.64    2.88 
   0   2  -1   32.64    2.92 
   0   2  -1   25.79    2.68 
   0   2   1   27.53    2.66 
   0   2  -1   26.92    2.66 
   0   2  -1   28.96    2.61 
  -1  -2  -1    8.69    1.07 
  -1  -2  -1    7.98    1.05 
  -1  -2  -1   10.08    0.95 
   1  -2   1    8.61    1.06 
   1  -2   1    8.87    0.96 
  -1  -2  -1    9.63    1.06 
   1  -2   1    9.09    0.93 
   1  -2   1   11.59    1.12 
   1  -2   1    9.04    1.04 
   1  -2   1   10.10    0.92 
   1  -2   1    7.58    1.06 
   1  -2   1    9.03    0.93 
  -1  -2  -1   10.52    0.96 
  -1  -2  -1   10.55    0.97 
  -1  -2  -1   10.46    1.11 
  -1  -2  -1    7.65    0.98 
  -1   2  -1   10.19    0.92 
  -1   2  -1    8.28    1.10 
   1   2   1    8.22    0.96 
  -1   2  -1   10.73    1.06 
   1   2   1   10.79    0.91 
  -1   2  -1    8.91    0.91 
  -1   2  -1    9.47    0.92 
  -1   2  -1   10.12    0.98 
   1   2   1    9.36    0.95 
   1   2   1    9.38    0.94 
   1   2   1   10.84    1.01 
  -2  -2  -1    4.47    0.62 
  -2  -2  -1    7.35    0.74 
   2  -2   1    6.37    0.72 
   2  -2   1    5.70    0.59 
  -2  -2  -1    5.63    0.65 
   2  -2   1    6.44    0.70 
   2  -2   1    6.88    0.66 
   2  -2   1    6.50    0.60 
  -2  -2  -1    5.77    0.63 
  -2  -2  -1    7.69    0.74 
   2  -2   1    6.77    0.58 
  -2  -2  -1    6.01    0.72 
   2  -2   1    5.72    0.71 
  -2  -2  -1    5.56    0.70 
   2  -2   1    5.13    0.70 
  -2   2  -1    5.89    0.67 
  -2   2  -1    5.35    0.57 
   2   2   1    5.01    0.62 
  -2   2  -1    6.09    0.70 
  -2   2  -1    6.41    0.59 
  -2   2  -1    6.53    0.73 
   2   2   1    6.24    0.64 
  -2   2  -1    5.54    0.59 
   2   2   1    5.80    0.66 
   2   2   1    5.64    0.64 
  -3  -2  -1  749.17   91.20 
  -3  -2  -1  989.52   82.59 
  -3  -2  -1  940.22   92.51 
  -3  -2  -1  908.87   93.47 
   3  -2   1  884.26   80.71 
   3  -2   1  831.82   93.45 
   3  -2   1  966.38   82.54 
   3  -2   1  835.15   89.26 
   3  -2   1  848.24   88.03 
   3  -2   1  739.76   92.49 
  -3  -2  -1  943.03   88.43 
   3  -2   1  781.11   98.68 
   3   2   1  916.73   82.57 
   3   2   1  976.81   80.71 
  -3   2  -1  956.29   80.71 
  -3   2  -1  878.65   88.42 
  -3   2  -1  972.68   88.05 
   3   2   1  849.67   88.03 
   3   2   1 1000.00   83.16 
  -3   2  -1  754.38   98.68 
  -3   2  -1  907.74   93.46 
  -4  -2  -1  499.19   46.47 
   4  -2   1  483.03   49.55 
  -4  -2  -1  468.49   51.33 
  -4  -2  -1  469.52   52.03 
   4  -2   1  509.58   50.25 
   4  -2   1  572.22   52.57 
   4  -2   1  540.58   52.05 
   4  -2   1  498.33   45.39 
  -4   2  -1  500.99   45.38 
   4   2   1  446.25   45.38 
   4   2   1  518.72   46.46 
   4   2   1  464.45   49.54 
  -4   2  -1  498.96   49.74 
  -4   2  -1  525.44   52.57 
   4   2   1  485.09   46.79 
  -5  -2  -1   26.81    2.97 
  -5  -2  -1   21.17    2.78 
   5  -2   1   29.92    2.78 
   5  -2   1   31.33    2.82 
   5  -2   1   22.76    2.94 
   5  -2   1   28.76    2.45 
  -5  -2  -1   24.55    2.66 
   5  -2   1   25.15    2.80 
  -5  -2  -1   30.36    2.81 
  -5  -2  -1   30.03    2.85 
   5  -2   1   26.36    2.40 
  -5  -2  -1   26.70    2.53 
   5  -2   1   23.94    2.71 
   5   2   1   26.82    2.55 
  -5   2  -1   22.68    2.44 
  -5   2  -1   25.43    2.81 
   5   2   1   29.00    2.42 
   5   2   1   21.01    2.69 
  -5   2  -1   25.58    2.39 
  -5   2  -1   26.13    2.95 
  -5   2  -1   25.77    2.66 
   5   2   1   22.67    2.50 
   6  -2   1    0.99    0.15 
  -6  -2  -1    1.28    0.26 
  -6  -2  -1    0.64    0.20 
   6  -2   1    0.63    0.19 
   6  -2   1    1.26    0.32 
   6  -2   1    0.91    0.14 
  -6  -2  -1    0.65    0.26 
  -6  -2  -1    1.40    0.24 
  -6  -2  -1    0.49    0.19 
   6  -2   1    0.57    0.18 
   6  -2   1    1.11    0.31 
  -6  -2  -1    0.45    0.21 
  -6   2  -1    1.01    0.15 
  -6   2  -1    0.97    0.21 
  -6   2  -1    0.98    0.21 
   6   2   1    0.89    0.21 
   6   2   1    1.04    0.26 
   6   2   1    0.69    0.26 
  -6   2  -1    0.81    0.13 
  -6   2  -1    1.06    0.22 
   7  -2   1   45.99    4.55 
  -7  -2  -1   44.01    4.58 
   7  -2   1   47.12    3.89 
   7  -2   1   39.76    4.38 
   7  -2   1   43.13    4.01 
  -7  -2  -1   42.09    4.51 
   7  -2   1   46.79    4.45 
  -7  -2  -1   46.12    4.53 
  -7  -2  -1   39.00    4.06 
  -7  -2  -1   45.80    4.82 
  -7  -2  -1   35.99    4.30 
  -7   2  -1   38.66    4.30 
  -7   2  -1   38.06    4.54 
   7   2   1   40.61    4.11 
  -7   2  -1   50.40    4.03 
   7   2   1   36.17    4.36 
  -7   2  -1   40.53    3.87 
   7   2   1   44.17    4.06 
  -7   2  -1   38.42    4.78 
   8  -2   1   45.11    3.71 
  -8  -2  -1   35.88    4.59 
   8  -2   1   40.31    4.35 
  -8  -2  -1   40.41    4.32 
  -8  -2  -1   49.55    4.36 
   8  -2   1   33.60    3.77 
   8  -2   1   43.51    3.86 
   8  -2   1   39.51    4.26 
  -8  -2  -1   38.04    4.13 
   8  -2   1   39.58    4.23 
  -8  -2  -1   38.10    4.38 
  -8  -2  -1   42.29    3.92 
  -8   2  -1   39.95    3.78 
  -8   2  -1   45.90    3.87 
  -8   2  -1   35.75    4.11 
  -8   2  -1   42.71    4.59 
   8   2   1   34.20    4.20 
  -8   2  -1   43.88    4.36 
   8   2   1   45.22    3.97 
   8   2   1   39.38    3.88 
  -9  -2  -1   80.82    9.72 
   9  -2   1  101.03    9.60 
  -9  -2  -1   86.84   10.48 
   9  -2   1   93.44    9.92 
   9  -2   1   98.99    8.81 
  -9  -2  -1   95.06    8.83 
   9  -2   1   88.69    9.49 
   9  -2   1   80.19    8.50 
  -9  -2  -1   86.53    9.95 
  -9   2  -1   96.28    8.70 
  -9   2  -1   86.06   10.46 
  -9   2  -1  115.81    9.40 
  -9   2  -1   91.22    9.92 
   9   2   1   88.84    9.48 
   9   2   1  105.94    8.82 
  -9   2  -1   97.73    9.39 
   9   2   1   99.21    8.92 
 -10  -2  -1   38.45    4.04 
  10  -2   1   44.00    4.08 
 -10  -2  -1   30.52    3.84 
 -10  -2  -1   38.33    3.67 
  10  -2   1   38.86    4.01 
 -10  -2  -1   38.43    4.30 
  10  -2   1   36.57    3.60 
  10  -2   1   39.78    4.02 
 -10  -2  -1   32.06    4.08 
 -10  -2  -1   45.58    4.07 
  10   2   1   35.44    3.69 
  10   2   1   36.08    3.62 
 -10   2  -1   39.35    4.07 
 -10   2  -1   36.82    4.07 
  10   2   1   36.60    4.00 
 -10   2  -1   34.67    3.52 
 -10   2  -1   34.43    3.83 
 -10   2  -1   35.86    4.28 
 -10   2  -1   48.50    3.91 
  11  -2   1    6.83    1.09 
  11  -2   1    7.25    0.75 
 -11  -2  -1    7.06    0.95 
  11  -2   1    7.99    1.07 
 -11  -2  -1    5.98    0.83 
 -11  -2  -1    4.07    0.86 
 -11  -2  -1    7.79    0.92 
  11  -2   1    5.27    0.85 
 -11  -2  -1    6.38    0.89 
  11  -2   1    5.68    0.66 
  11   2   1    5.70    0.80 
  11   2   1    6.49    1.06 
 -11   2  -1    8.04    0.88 
 -11   2  -1    9.01    0.91 
 -11   2  -1    7.39    0.91 
 -11   2  -1    6.94    0.80 
  11   2   1    9.67    0.87 
 -11   2  -1    5.93    0.67 
  11   2   1    5.42    0.86 
 -11   2  -1    7.55    0.86 
 -12  -2  -1    0.10    0.19 
  12  -2   1    0.08    0.16 
  12  -2   1    0.02    0.09 
  12  -2   1    0.07    0.15 
 -12  -2  -1   -0.02    0.20 
  12  -2   1   -0.13    0.25 
  12  -2   1    0.41    0.40 
 -12  -2  -1   -0.19    0.15 
 -12  -2  -1   -0.12    0.12 
  12   2   1   -0.32    0.19 
 -12   2  -1    0.05    0.21 
 -12   2  -1    0.05    0.19 
 -12   2  -1   -0.05    0.16 
 -12   2  -1    0.08    0.11 
 -12   2  -1    0.03    0.18 
  12   2   1   -0.22    0.19 
 -12   2  -1    0.11    0.17 
  12   2   1    0.01    0.17 
  12   2   1    0.10    0.36 
 -13  -2  -1    3.52    0.52 
  13  -2   1    2.50    0.65 
  13  -2   1    2.86    0.39 
  13  -2   1    1.98    0.69 
 -13  -2  -1    2.37    0.54 
 -13  -2  -1    4.85    0.55 
 -13  -2  -1    3.86    0.65 
  13  -2   1    3.66    0.58 
 -13  -2  -1    4.18    0.65 
  13  -2   1    4.15    0.53 
 -13   2  -1    3.29    0.61 
 -13   2  -1    3.27    0.51 
 -13   2  -1    4.27    0.64 
  13   2   1    2.43    0.75 
  13   2   1    2.26    0.55 
  13   2   1    3.13    0.53 
 -13   2  -1    3.05    0.57 
  13   2   1    2.69    0.60 
 -13   2  -1    3.72    0.43 
  14  -2   1   17.77    2.42 
 -14  -2  -1   16.17    2.22 
 -14  -2  -1   15.50    1.95 
 -14  -2  -1   21.71    2.15 
  14  -2   1   17.92    2.18 
  14  -2   1   21.51    1.78 
  14  -2   1   18.30    1.87 
 -14  -2  -1   19.78    1.95 
 -14  -2  -1   16.59    2.14 
 -14   2  -1   16.00    2.10 
 -14   2  -1   18.30    1.98 
  14   2   1   16.73    2.05 
 -14   2  -1   21.51    1.81 
  14   2   1   16.06    1.96 
 -14   2  -1   22.06    2.06 
 -14   2  -1   16.27    2.20 
  14   2   1   17.12    1.89 
  14   2   1   16.88    2.36 
 -15  -2  -1   14.22    1.61 
 -15  -2  -1   20.39    1.84 
 -15  -2  -1   15.45    1.60 
  15  -2   1   14.16    2.05 
 -15  -2  -1   14.32    1.86 
  15  -2   1   16.44    1.45 
  15  -2   1   15.08    1.99 
  15  -2   1   15.55    1.56 
  15   2   1   12.72    1.70 
 -15   2  -1   14.80    1.68 
 -15   2  -1   11.62    1.79 
 -15   2  -1   14.65    1.64 
  15   2   1   15.21    1.73 
  15   2   1   14.75    1.58 
  15   2   1   12.05    1.98 
 -15   2  -1   13.02    1.75 
 -16  -2  -1    7.33    0.82 
  16  -2   1    7.95    0.88 
 -16  -2  -1    6.71    1.01 
  16  -2   1    7.66    1.34 
 -16  -2  -1    6.93    0.86 
  16  -2   1    7.04    1.16 
 -16  -2  -1    5.63    0.98 
  16   2   1    6.49    1.02 
  16   2   1    4.99    0.82 
  16   2   1    6.24    1.26 
 -16   2  -1    5.55    0.97 
  16   2   1    5.86    0.96 
 -16   2  -1    6.32    0.84 
 -16   2  -1    5.69    0.91 
 -16   2  -1    6.51    0.98 
  17  -2   1    3.48    0.94 
 -17  -2  -1    2.21    0.44 
  17  -2   1    1.44    0.41 
 -17  -2  -1    3.44    0.61 
 -17  -2  -1    2.06    0.54 
  17  -2   1    2.42    0.71 
  17   2   1    2.34    0.57 
  17   2   1    1.91    0.77 
 -17   2  -1    2.59    0.54 
  17   2   1    1.27    0.52 
  17   2   1    2.80    0.51 
 -17   2  -1    1.70    0.48 
 -17   2  -1    1.20    0.41 
  18  -2   1    8.05    0.96 
  18  -2   1    7.21    1.29 
 -18  -2  -1    6.53    1.08 
 -18  -2  -1    6.81    1.12 
  18  -2   1    6.71    1.39 
 -18  -2  -1    6.17    0.93 
  18   2   1    6.03    0.92 
 -18   2  -1    7.39    1.12 
  18   2   1    5.74    1.33 
  18   2   1    8.47    1.18 
 -18   2  -1    8.59    1.10 
  18   2   1    8.68    1.15 
 -18   2  -1    7.26    0.94 
  19  -2   1   -0.57    0.48 
 -19  -2  -1    0.29    0.34 
  19  -2   1    0.57    0.60 
 -19  -2  -1    0.27    0.25 
 -19  -2  -1   -0.14    0.34 
 -19   2  -1    0.02    0.29 
  19   2   1    1.29    0.73 
 -19   2  -1    0.39    0.28 
  19   2   1    0.94    0.41 
 -19   2  -1   -0.11    0.29 
  19   2   1    0.49    0.40 
  19   2   1    0.17    0.31 
  20  -2   1    1.86    0.91 
  20  -2   1    1.36    0.68 
 -20  -2  -1    1.41    0.56 
 -20  -2  -1    3.32    0.67 
 -20  -2  -1    2.76    0.51 
 -20   2  -1    2.81    0.62 
 -20   2  -1    1.75    0.53 
  20   2   1    0.39    0.64 
  20   2   1    1.83    0.53 
  20   2   1    2.87    0.65 
  20   2   1    1.56    0.62 
  21  -2   1    1.87    0.82 
  21  -2   1    2.77    1.11 
 -21  -2  -1    2.03    0.64 
 -21  -2  -1    2.21    0.52 
 -21   2  -1    3.26    0.70 
 -21   2  -1    2.84    0.67 
  21   2   1    3.16    0.71 
  21   2   1    3.94    0.87 
  21   2   1    3.72    0.67 
  21   2   1    3.16    1.02 
  22  -2   1    3.12    1.21 
 -22  -2  -1    2.72    0.68 
 -22  -2  -1    2.45    0.55 
  22  -2   1    1.40    0.80 
 -22   2  -1    3.27    0.68 
 -22   2  -1    3.51    0.71 
  22   2   1    1.64    0.71 
  22   2   1    1.46    0.95 
  22   2   1    2.11    0.65 
 -23  -2  -1    3.44    0.77 
 -23  -2  -1    1.87    0.53 
  23  -2   1    1.81    0.88 
  23  -2   1    1.60    1.10 
 -23   2  -1    3.16    0.73 
  23   2   1    0.58    0.89 
 -23   2  -1    2.87    0.70 
  23   2   1    3.98    0.83 
  23   2   1    3.19    0.88 
  24  -2   1   -0.41    0.60 
  24  -2   1   -0.28    0.92 
 -24  -2  -1    0.16    0.42 
 -24   2  -1   -0.04    0.40 
  24   2   1    0.52    0.65 
  24   2   1   -0.04    0.83 
  24   2   1   -0.48    0.42 
 -24   2  -1   -0.32    0.39 
  25  -2   1    5.96    1.59 
 -25  -2  -1    8.12    1.23 
  25  -2   1    4.89    1.33 
  25   2   1    4.04    1.53 
 -25   2  -1    3.55    0.93 
  25   2   1    5.53    1.05 
  24  -3  -1    1.79    0.92 
  24  -3  -1    1.86    1.07 
 -24  -3   1    0.77    0.61 
  24   3  -1    0.58    0.96 
 -24   3   1    1.47    0.61 
  24   3  -1    1.44    0.63 
 -24   3   1    2.19    0.63 
  24   3  -1    1.44    0.81 
  23  -3  -1   -0.14    0.64 
 -23  -3   1    0.42    0.49 
  23  -3  -1    0.22    0.87 
  23   3  -1    0.89    0.84 
 -23   3   1    0.10    0.35 
  23   3  -1    1.42    0.67 
  23   3  -1   -0.04    0.55 
 -23   3   1   -0.11    0.44 
  22  -3  -1    6.27    1.45 
 -22  -3   1    5.91    0.87 
 -22  -3   1    5.75    1.06 
  22  -3  -1    5.20    1.26 
  22   3  -1    3.61    1.25 
 -22   3   1    5.44    1.01 
  22   3  -1    8.79    1.23 
  22   3  -1    5.94    1.10 
 -22   3   1    5.49    1.00 
  21  -3  -1    0.64    0.87 
 -21  -3   1    0.09    0.36 
  21  -3  -1   -0.49    0.51 
 -21  -3   1    0.19    0.28 
 -21   3   1    0.61    0.44 
 -21   3   1    0.55    0.42 
  21   3  -1    3.82    1.12 
  21   3  -1    0.24    0.40 
  21   3  -1    1.07    0.48 
  21   3  -1    0.43    0.46 
  20  -3  -1    5.67    1.19 
 -20  -3   1    2.87    0.77 
  20  -3  -1    6.07    1.30 
 -20  -3   1    5.25    0.93 
 -20  -3   1    5.66    0.75 
  20   3  -1    4.95    0.91 
 -20   3   1    3.44    0.80 
  20   3  -1    5.29    0.93 
  20   3  -1    2.56    0.99 
 -20   3   1    4.22    0.79 
  20   3  -1    4.15    0.79 
 -19  -3   1    3.52    0.55 
 -19  -3   1    2.75    0.66 
  19  -3  -1    2.29    0.81 
  19  -3  -1    3.59    1.04 
 -19  -3   1    1.46    0.54 
  19   3  -1    1.68    0.79 
 -19   3   1    1.71    0.53 
  19   3  -1    4.50    0.71 
  19   3  -1    1.90    0.59 
  19   3  -1    2.53    0.68 
 -19   3   1    2.77    0.61 
 -18  -3   1   36.98    3.65 
  18  -3  -1   35.02    4.08 
  18  -3  -1   34.77    4.03 
 -18  -3   1   40.42    3.94 
 -18  -3   1   28.67    4.13 
  18   3  -1   36.54    4.10 
  18   3  -1   41.55    3.73 
 -18   3   1   30.77    3.72 
  18   3  -1   34.06    3.82 
 -18   3   1   38.06    3.97 
  18   3  -1   34.20    3.54 
  17  -3  -1    1.98    0.67 
 -17  -3   1    0.73    0.42 
  17  -3  -1    1.18    0.60 
 -17  -3   1    0.60    0.37 
 -17  -3   1    1.78    0.36 
  17   3  -1    1.18    0.50 
  17   3  -1    1.01    0.44 
 -17   3   1    0.95    0.39 
 -17   3   1    0.92    0.40 
  17   3  -1    1.23    0.68 
  17   3  -1    0.81    0.39 
 -16  -3   1    0.32    0.31 
  16  -3  -1    0.55    0.53 
 -16  -3   1    0.90    0.29 
 -16  -3   1    1.45    0.43 
  16  -3  -1    0.92    0.31 
  16  -3  -1    1.05    0.55 
  16   3  -1    0.71    0.41 
  16   3  -1    1.22    0.44 
 -16   3   1    1.06    0.39 
  16   3  -1    1.75    0.45 
  16   3  -1    1.36    0.67 
 -16   3   1    0.78    0.36 
  15  -3  -1   46.20    4.62 
 -15  -3   1   40.80    5.49 
  15  -3  -1   42.38    5.15 
  15  -3  -1   51.94    5.23 
 -15  -3   1   51.37    4.86 
 -15  -3   1   48.54    5.15 
  15   3  -1   46.88    4.68 
 -15   3   1   46.23    4.95 
 -15   3   1   49.43    5.22 
  15   3  -1   51.98    5.23 
  15   3  -1   52.37    4.83 
 -14  -3   1    0.91    0.35 
  14  -3  -1    0.42    0.49 
 -14  -3   1    0.50    0.22 
 -14  -3   1    0.27    0.20 
  14  -3  -1    0.31    0.12 
  14  -3  -1    0.39    0.23 
  14  -3  -1   -0.15    0.34 
 -14  -3   1   -0.19    0.21 
  14   3  -1    0.10    0.47 
  14   3  -1    0.41    0.28 
 -14   3   1    0.38    0.28 
 -14   3   1    0.48    0.30 
 -14   3   1    0.60    0.27 
  14   3  -1    0.42    0.40 
 -13  -3   1    0.27    0.26 
 -13  -3   1    0.29    0.21 
  13  -3  -1    0.59    0.25 
  13  -3  -1    1.33    0.51 
 -13  -3   1    0.33    0.27 
 -13  -3   1    1.16    0.25 
  13  -3  -1    0.52    0.13 
 -13  -3   1    0.58    0.29 
 -13  -3   1    0.43    0.27 
  13  -3  -1    0.55    0.37 
  13  -3  -1    0.93    0.26 
 -13   3   1    0.58    0.29 
  13   3  -1    0.74    0.51 
  13   3  -1    1.36    0.43 
 -13   3   1    0.49    0.30 
  13   3  -1    0.45    0.29 
 -13   3   1    0.85    0.27 
  12  -3  -1   21.44    2.14 
 -12  -3   1   20.74    2.22 
  12  -3  -1   20.24    1.82 
 -12  -3   1   23.38    2.20 
  12  -3  -1   18.48    2.23 
 -12  -3   1   17.41    1.97 
  12  -3  -1   18.05    2.20 
  12  -3  -1   17.96    1.89 
 -12  -3   1   17.58    2.16 
  12  -3  -1   20.51    1.77 
 -12   3   1   15.17    2.22 
  12   3  -1   19.31    2.06 
  12   3  -1   18.41    2.25 
 -12   3   1   20.49    2.10 
 -12   3   1   20.25    2.18 
  12   3  -1   18.64    1.99 
  12   3  -1   15.77    1.80 
  11  -3  -1    4.45    0.83 
 -11  -3   1    4.93    0.76 
  11  -3  -1    5.14    0.57 
  11  -3  -1    5.54    0.87 
  11  -3  -1    4.46    0.45 
  11  -3  -1    4.55    0.62 
 -11  -3   1    4.48    0.69 
  11  -3  -1    4.62    0.63 
  11  -3  -1    4.22    0.45 
 -11  -3   1    4.36    0.59 
 -11  -3   1    3.88    0.67 
 -11  -3   1    4.78    0.70 
  11   3  -1    4.12    0.81 
  11   3  -1    3.35    0.49 
  11   3  -1    3.69    0.63 
 -11   3   1    2.84    0.63 
 -11   3   1    3.38    0.61 
 -11   3   1    4.20    0.67 
  11   3  -1    3.95    0.72 
  10  -3  -1    0.64    0.20 
  10  -3  -1    0.33    0.32 
 -10  -3   1    0.30    0.22 
  10  -3  -1    0.49    0.14 
  10  -3  -1    0.49    0.18 
 -10  -3   1    0.66    0.25 
 -10  -3   1    0.67    0.27 
  10  -3  -1    0.54    0.12 
 -10  -3   1    1.26    0.34 
  10  -3  -1    0.65    0.18 
  10  -3  -1    0.41    0.32 
 -10  -3   1    0.38    0.17 
  10   3  -1    0.44    0.16 
  10   3  -1    0.31    0.37 
 -10   3   1    0.49    0.19 
  10   3  -1    0.55    0.33 
  10   3  -1    0.60    0.27 
 -10   3   1    0.19    0.24 
 -10   3   1    0.40    0.23 
  -9  -3   1    0.18    0.17 
   9  -3  -1   -0.05    0.12 
   9  -3  -1    0.11    0.25 
  -9  -3   1    0.15    0.21 
  -9  -3   1    0.03    0.14 
   9  -3  -1   -0.17    0.06 
   9  -3  -1    0.13    0.13 
  -9  -3   1   -0.08    0.14 
  -9  -3   1    0.10    0.16 
   9  -3  -1    0.07    0.27 
  -9  -3   1    0.03    0.23 
   9  -3  -1    0.05    0.12 
  -9   3   1   -0.22    0.10 
   9   3  -1    0.50    0.31 
   9   3  -1    0.39    0.22 
   9   3  -1    0.03    0.10 
  -9   3   1    0.11    0.22 
   9   3  -1   -0.27    0.28 
  -9   3   1    0.03    0.18 
  -8  -3   1   35.01    3.49 
   8  -3  -1   32.95    3.77 
  -8  -3   1   36.55    4.07 
  -8  -3   1   33.05    3.62 
  -8  -3   1   30.06    3.86 
   8  -3  -1   38.45    3.75 
  -8  -3   1   34.71    3.83 
   8  -3  -1   35.19    3.38 
   8  -3  -1   34.56    3.82 
   8   3  -1   31.07    3.71 
   8   3  -1   33.83    3.46 
  -8   3   1   42.47    4.04 
   8   3  -1   35.84    3.53 
   8   3  -1   42.29    3.33 
  -8   3   1   32.81    3.66 
  -7  -3   1    9.44    1.37 
  -7  -3   1   13.63    1.41 
   7  -3  -1   10.82    1.16 
  -7  -3   1   10.63    1.43 
  -7  -3   1   12.67    1.40 
  -7  -3   1   12.88    1.32 
   7  -3  -1   12.47    1.41 
   7  -3  -1   10.41    1.14 
   7  -3  -1   14.25    1.41 
   7  -3  -1   11.67    1.33 
   7  -3  -1   12.22    1.39 
   7  -3  -1    9.78    1.38 
  -7   3   1   14.31    1.41 
   7   3  -1   11.93    1.33 
   7   3  -1   12.15    1.17 
   7   3  -1   12.46    1.29 
   7   3  -1   13.96    1.40 
  -7   3   1   13.89    1.37 
  -6  -3   1   13.31    1.17 
   6  -3  -1    8.23    1.05 
   6  -3  -1    9.84    1.09 
   6  -3  -1    9.68    1.03 
  -6  -3   1    9.91    1.09 
  -6  -3   1    7.73    0.96 
   6  -3  -1    9.31    1.07 
  -6  -3   1    8.29    1.00 
   6  -3  -1    7.84    0.86 
   6  -3  -1    9.66    0.89 
   6  -3  -1    9.27    1.10 
  -6   3   1    8.35    1.07 
   6   3  -1    9.64    0.91 
  -6   3   1    8.56    1.02 
   6   3  -1    8.87    0.99 
   6   3  -1    8.05    1.05 
   6   3  -1    8.24    1.05 
   5  -3  -1    4.15    0.65 
   5  -3  -1    5.63    0.56 
  -5  -3   1    4.36    0.62 
   5  -3  -1    4.65    0.62 
   5  -3  -1    4.42    0.63 
   5  -3  -1    5.42    0.55 
  -5  -3   1    4.12    0.61 
  -5  -3   1    3.62    0.57 
  -5  -3   1    4.13    0.64 
   5  -3  -1    4.28    0.44 
  -5  -3   1    5.70    0.72 
  -5   3   1    3.41    0.54 
   5   3  -1    3.45    0.57 
   5   3  -1    4.98    0.65 
   5   3  -1    4.27    0.51 
  -5   3   1    2.89    0.52 
   5   3  -1    4.04    0.57 
   4  -3  -1   13.97    1.34 
  -4  -3   1   13.73    1.48 
   4  -3  -1   13.19    1.55 
  -4  -3   1   12.54    1.57 
  -4  -3   1   17.80    1.64 
  -4  -3   1   15.94    1.66 
   4  -3  -1   12.89    1.61 
   4  -3  -1   14.88    1.34 
  -4  -3   1   13.97    1.44 
   4  -3  -1   15.67    1.61 
  -4  -3   1   11.14    1.46 
   4  -3  -1   14.66    1.50 
   4  -3  -1   14.61    1.55 
   4   3  -1   14.10    1.35 
  -4   3   1   12.93    1.54 
   4   3  -1   13.19    1.42 
  -4   3   1   14.82    1.62 
  -4   3   1   14.81    1.50 
   4   3  -1   15.01    1.46 
   4   3  -1   11.92    1.48 
  -3  -3   1    1.74    0.32 
   3  -3  -1    1.93    0.37 
   3  -3  -1    1.67    0.30 
   3  -3  -1    2.09    0.31 
  -3  -3   1    1.71    0.33 
   3  -3  -1    1.86    0.30 
   3  -3  -1    2.15    0.24 
   3  -3  -1    1.59    0.34 
   3  -3  -1    1.89    0.25 
  -3  -3   1    2.21    0.30 
  -3  -3   1    2.05    0.35 
  -3  -3   1    2.00    0.37 
  -3  -3   1    1.25    0.33 
   3   3  -1    2.65    0.36 
  -3   3   1    2.21    0.32 
   3   3  -1    1.53    0.27 
   3   3  -1    1.77    0.34 
  -3   3   1    2.54    0.30 
   3   3  -1    1.44    0.28 
   2  -3  -1   12.13    1.20 
  -2  -3   1   11.19    1.10 
   2  -3  -1    9.98    1.23 
   2  -3  -1   10.62    1.04 
  -2  -3   1   12.93    1.28 
  -2  -3   1   11.99    1.15 
   2  -3  -1   10.73    1.10 
   2  -3  -1    9.86    1.24 
  -2  -3   1   10.18    1.22 
   2  -3  -1   10.51    1.19 
  -2  -3   1   10.35    1.21 
  -2  -3   1   11.16    1.25 
   2  -3  -1   10.15    1.04 
   2   3  -1    8.62    1.09 
   2   3  -1    9.44    1.03 
   2   3  -1    9.84    1.08 
   2   3  -1   10.95    1.11 
  -2   3   1   11.02    1.02 
   1  -3  -1    2.81    0.45 
  -1  -3   1    2.49    0.44 
   1  -3  -1    2.81    0.49 
   1  -3  -1    3.13    0.34 
  -1  -3   1    2.18    0.40 
  -1  -3   1    4.21    0.48 
  -1  -3   1    2.99    0.47 
   1  -3  -1    3.98    0.45 
   1  -3  -1    2.61    0.38 
   1  -3  -1    3.53    0.47 
  -1  -3   1    3.84    0.46 
   1  -3  -1    2.99    0.43 
  -1  -3   1    3.02    0.47 
   1  -3  -1    3.15    0.39 
  -1  -3   1    3.23    0.52 
   1  -3  -1    2.30    0.44 
   1  -3  -1    3.17    0.47 
   1   3  -1    4.09    0.36 
  -1   3   1    2.79    0.35 
  -1   3   1    2.92    0.38 
   1   3  -1    2.74    0.40 
   1   3  -1    3.28    0.42 
   1   3  -1    3.13    0.40 
   0  -3  -1   11.37    1.06 
   0  -3   1   10.59    0.95 
   0  -3   1    9.74    1.10 
   0  -3   1    8.70    1.06 
   0  -3  -1   10.52    1.10 
   0  -3   1    9.05    0.94 
   0  -3   1    9.00    1.07 
   0  -3  -1    7.99    0.92 
   0  -3   1    9.76    1.10 
   0  -3  -1    7.73    1.00 
   0  -3   1    9.05    1.04 
   0  -3  -1    6.88    1.03 
   0  -3   1    8.57    1.03 
   0   3  -1   10.35    0.92 
   0   3   1    8.80    0.92 
   0   3   1    8.50    1.03 
   0   3  -1    8.53    0.93 
   0   3  -1   10.15    0.93 
   0   3  -1    9.28    0.93 
   0   3   1    7.72    0.91 
   0   3   1    8.46    0.89 
  -1  -3  -1    1.97    0.36 
  -1  -3  -1    2.60    0.36 
   1  -3   1    3.92    0.41 
  -1  -3  -1    2.30    0.37 
   1  -3   1    2.60    0.34 
   1  -3   1    1.81    0.36 
  -1  -3  -1    3.44    0.46 
  -1  -3  -1    2.67    0.44 
   1  -3   1    2.14    0.40 
   1  -3   1    2.60    0.39 
   1  -3   1    2.80    0.39 
   1  -3   1    2.13    0.42 
   1  -3   1    3.12    0.27 
  -1  -3  -1    2.35    0.27 
  -1  -3  -1    2.55    0.35 
   1  -3   1    2.90    0.33 
   1   3   1    1.96    0.26 
   1   3   1    1.98    0.32 
  -1   3  -1    2.66    0.39 
   1   3   1    2.63    0.34 
  -1   3  -1    2.50    0.31 
  -1   3  -1    2.25    0.30 
   1   3   1    2.42    0.32 
  -1   3  -1    2.45    0.32 
   1   3   1    2.59    0.37 
  -1   3  -1    2.14    0.31 
   2  -3   1   22.03    2.53 
   2  -3   1   24.62    2.47 
  -2  -3  -1   22.64    2.54 
  -2  -3  -1   20.33    2.49 
  -2  -3  -1   23.83    2.26 
   2  -3   1   18.74    2.33 
  -2  -3  -1   22.80    2.64 
   2  -3   1   26.71    2.65 
   2  -3   1   22.43    2.21 
  -2  -3  -1   25.89    2.38 
   2  -3   1   24.66    2.53 
   2  -3   1   22.91    2.21 
  -2  -3  -1   27.26    2.54 
  -2   3  -1   23.71    2.19 
   2   3   1   21.84    2.34 
   2   3   1   21.62    2.23 
  -2   3  -1   21.96    2.16 
  -2   3  -1   20.03    2.51 
  -2   3  -1   21.01    2.19 
  -2   3  -1   21.93    2.35 
  -2   3  -1   25.87    2.66 
   2   3   1   23.43    2.17 
   2   3   1   27.43    2.41 
   2   3   1   22.90    2.25 
  -3  -3  -1   11.86    1.23 
   3  -3   1   13.21    1.27 
   3  -3   1   11.50    1.36 
   3  -3   1   11.48    1.16 
   3  -3   1   10.39    1.36 
  -3  -3  -1   13.13    1.42 
  -3  -3  -1   12.78    1.39 
   3  -3   1   11.29    1.34 
  -3  -3  -1   10.69    1.25 
  -3  -3  -1   10.74    1.37 
   3  -3   1   10.59    1.14 
   3   3   1   12.79    1.16 
   3   3   1   12.78    1.22 
  -3   3  -1   12.26    1.28 
   3   3   1   15.55    1.29 
   3   3   1    9.56    1.21 
   3   3   1   12.28    1.27 
  -3   3  -1   14.38    1.42 
  -3   3  -1   10.42    1.34 
  -3   3  -1   11.44    1.15 
   4  -3   1  214.50   22.01 
   4  -3   1  207.36   20.25 
  -4  -3  -1  182.69   22.76 
  -4  -3  -1  218.39   20.34 
   4  -3   1  188.08   24.23 
  -4  -3  -1  259.21   23.02 
  -4  -3  -1  199.55   24.26 
   4  -3   1  246.94   22.99 
   4  -3   1  208.81   21.66 
   4  -3   1  258.16   22.80 
   4   3   1  205.93   20.47 
  -4   3  -1  218.27   19.83 
   4   3   1  186.56   21.90 
  -4   3  -1  244.38   22.99 
   4   3   1  208.33   21.66 
   4   3   1  220.05   20.32 
   4   3   1  236.66   19.84 
   5  -3   1   11.55    1.23 
   5  -3   1    9.38    1.19 
   5  -3   1    9.36    1.26 
   5  -3   1   10.78    1.02 
  -5  -3  -1   10.37    1.29 
   5  -3   1   10.78    1.26 
  -5  -3  -1   10.77    1.26 
  -5  -3  -1    9.23    1.26 
   5  -3   1   14.71    1.33 
  -5  -3  -1   10.93    1.17 
  -5  -3  -1   11.31    1.15 
  -5   3  -1   11.07    1.03 
  -5   3  -1    9.82    1.27 
   5   3   1    9.83    1.11 
   5   3   1   11.32    1.15 
   5   3   1   12.06    1.22 
  -5   3  -1   10.24    1.22 
   6  -3   1  133.04   15.54 
   6  -3   1  155.93   14.20 
   6  -3   1  142.11   13.96 
  -6  -3  -1  134.81   13.08 
  -6  -3  -1  129.07   14.62 
   6  -3   1  144.11   14.64 
  -6  -3  -1  152.42   15.58 
   6  -3   1  125.51   14.72 
  -6  -3  -1  150.16   13.97 
  -6  -3  -1  151.65   14.79 
  -6  -3  -1  160.90   14.50 
  -6   3  -1  159.07   15.56 
  -6   3  -1  135.90   12.70 
   6   3   1  114.81   13.92 
   6   3   1  144.88   13.06 
  -6   3  -1  125.16   14.73 
   6   3   1  121.72   12.71 
   6   3   1  131.20   13.16 
  -7  -3  -1   69.07    6.83 
  -7  -3  -1   66.01    7.60 
   7  -3   1   79.56    7.44 
   7  -3   1   82.88    6.72 
   7  -3   1   69.83    7.61 
   7  -3   1   61.94    7.28 
   7  -3   1   76.22    8.09 
   7   3   1   63.65    7.29 
   7   3   1   67.57    6.87 
  -7   3  -1   71.46    6.56 
  -7   3  -1   69.12    7.65 
   7   3   1   78.45    6.82 
  -7   3  -1   73.30    7.24 
  -7   3  -1   66.92    7.25 
   8  -3   1    8.47    1.14 
   8  -3   1    8.82    1.00 
  -8  -3  -1    7.93    1.02 
   8  -3   1    7.38    1.13 
  -8  -3  -1    9.29    0.99 
  -8  -3  -1    8.86    1.18 
  -8  -3  -1    6.26    1.04 
  -8  -3  -1    9.48    1.07 
   8  -3   1    8.92    1.05 
   8  -3   1    8.22    0.82 
  -8  -3  -1    8.38    0.97 
  -8   3  -1    9.09    1.12 
   8   3   1    7.84    1.02 
  -8   3  -1    7.54    1.04 
  -8   3  -1    8.96    0.96 
   8   3   1    7.40    1.13 
  -8   3  -1   10.54    1.03 
   8   3   1    8.24    0.93 
   9  -3   1   26.98    3.56 
  -9  -3  -1   27.10    3.60 
  -9  -3  -1   32.30    3.80 
  -9  -3  -1   33.90    3.26 
  -9  -3  -1   42.54    3.66 
  -9  -3  -1   32.19    3.57 
   9  -3   1   34.08    3.12 
   9  -3   1   32.53    3.56 
   9  -3   1   35.24    3.54 
  -9   3  -1   30.61    3.76 
  -9   3  -1   33.08    3.59 
  -9   3  -1   38.43    3.13 
  -9   3  -1   30.93    3.39 
  -9   3  -1   36.85    3.60 
   9   3   1   31.37    3.27 
   9   3   1   24.80    3.46 
  -9   3  -1   36.38    3.46 
   9   3   1   34.11    3.23 
 -10  -3  -1   40.05    4.70 
 -10  -3  -1   47.23    4.25 
 -10  -3  -1   46.24    4.44 
  10  -3   1   41.64    4.36 
  10  -3   1   35.16    3.78 
  10  -3   1   44.99    3.90 
  10  -3   1   37.28    4.42 
 -10  -3  -1   40.70    4.49 
  10  -3   1   37.73    4.38 
  10   3   1   39.74    4.35 
 -10   3  -1   39.72    3.89 
 -10   3  -1   42.23    4.45 
  10   3   1   43.02    3.99 
 -10   3  -1   40.47    4.67 
  10   3   1   41.39    4.06 
 -10   3  -1   39.36    4.24 
 -10   3  -1   42.13    4.45 
 -10   3  -1   40.25    4.20 
  11  -3   1   17.33    2.02 
 -11  -3  -1   16.41    1.93 
  11  -3   1   19.52    2.14 
  11  -3   1   17.54    1.75 
 -11  -3  -1   19.78    2.06 
 -11  -3  -1   17.59    2.16 
 -11  -3  -1   21.18    2.12 
 -11  -3  -1   16.29    2.07 
  11  -3   1   19.06    2.13 
  11  -3   1   16.94    1.68 
  11   3   1   19.15    1.87 
 -11   3  -1   18.18    2.05 
 -11   3  -1   16.26    2.12 
  11   3   1   17.95    1.92 
 -11   3  -1   17.64    1.92 
  11   3   1   18.22    2.13 
 -11   3  -1   22.11    2.07 
 -11   3  -1   16.39    1.97 
 -12  -3  -1    3.83    0.70 
  12  -3   1    4.49    0.41 
 -12  -3  -1    4.20    0.62 
  12  -3   1    4.35    0.85 
 -12  -3  -1    5.90    0.83 
  12  -3   1    3.25    0.76 
 -12  -3  -1    2.86    0.61 
 -12  -3  -1    3.81    0.68 
  12  -3   1    4.01    0.50 
  12  -3   1    3.99    0.62 
 -12   3  -1    3.98    0.60 
 -12   3  -1    3.00    0.64 
 -12   3  -1    3.49    0.63 
  12   3   1    4.47    0.91 
  12   3   1    4.01    0.61 
 -12   3  -1    4.07    0.69 
  12   3   1    3.98    0.70 
 -13  -3  -1    2.39    0.53 
  13  -3   1    3.12    0.40 
 -13  -3  -1    2.28    0.47 
 -13  -3  -1    3.48    0.56 
  13  -3   1    4.12    0.79 
 -13  -3  -1    2.30    0.56 
 -13  -3  -1    2.86    0.44 
  13  -3   1    2.00    0.64 
  13  -3   1    4.16    0.57 
 -13  -3  -1    3.24    0.58 
 -13   3  -1    2.74    0.47 
  13   3   1    1.74    0.67 
  13   3   1    1.82    0.44 
 -13   3  -1    2.20    0.51 
  13   3   1    1.88    0.46 
  13   3   1    2.74    0.57 
 -13   3  -1    2.11    0.51 
 -13   3  -1    2.95    0.54 
 -14  -3  -1   -0.17    0.24 
  14  -3   1   -0.14    0.37 
 -14  -3  -1    0.04    0.16 
 -14  -3  -1    0.05    0.25 
 -14  -3  -1   -0.25    0.21 
 -14  -3  -1   -0.09    0.17 
  14  -3   1   -0.21    0.39 
  14  -3   1    0.22    0.16 
 -14   3  -1   -0.20    0.17 
  14   3   1   -0.41    0.20 
  14   3   1    0.12    0.32 
 -14   3  -1    0.04    0.18 
  14   3   1   -0.21    0.41 
 -14   3  -1   -0.15    0.25 
 -14   3  -1    0.17    0.19 
  14   3   1   -0.13    0.22 
 -15  -3  -1    4.18    0.61 
  15  -3   1    4.55    0.54 
 -15  -3  -1    3.39    0.69 
  15  -3   1    2.78    0.80 
 -15  -3  -1    3.07    0.68 
  15  -3   1    2.27    0.79 
 -15  -3  -1    2.96    0.52 
  15   3   1    4.09    0.75 
  15   3   1    4.58    0.72 
  15   3   1    3.38    0.63 
 -15   3  -1    4.26    0.70 
  15   3   1    3.14    0.91 
 -15   3  -1    4.07    0.73 
 -15   3  -1    3.50    0.67 
  16  -3   1    0.82    0.65 
  16  -3   1    0.57    0.56 
 -16  -3  -1    0.61    0.25 
 -16  -3  -1    0.81    0.37 
 -16  -3  -1    0.83    0.40 
  16   3   1    0.31    0.34 
 -16   3  -1    1.42    0.44 
 -16   3  -1    0.87    0.38 
  16   3   1    1.85    0.78 
  16   3   1    0.65    0.40 
  16   3   1    1.05    0.40 
 -17  -3  -1    0.79    0.40 
  17  -3   1    1.13    0.60 
  17  -3   1    0.69    0.57 
 -17  -3  -1    1.66    0.47 
 -17  -3  -1    0.83    0.29 
 -17   3  -1    0.68    0.40 
  17   3   1    1.14    0.45 
  17   3   1    1.03    0.41 
 -17   3  -1    0.96    0.40 
  17   3   1    0.30    0.36 
  17   3   1    1.58    0.70 
 -18  -3  -1    1.22    0.52 
 -18  -3  -1    2.15    0.43 
  18  -3   1    3.52    1.03 
 -18  -3  -1    3.25    0.66 
  18  -3   1    2.53    0.79 
  18   3   1    3.36    0.68 
 -18   3  -1    1.73    0.51 
 -18   3  -1    2.02    0.52 
  18   3   1    3.05    0.67 
  18   3   1    2.20    0.87 
  18   3   1    1.17    0.44 
  19  -3   1    2.95    0.92 
 -19  -3  -1    2.57    0.65 
  19  -3   1    0.19    0.52 
 -19  -3  -1    2.38    0.64 
 -19  -3  -1    1.55    0.40 
  19   3   1    2.80    0.56 
 -19   3  -1    3.02    0.64 
  19   3   1    1.07    0.55 
  19   3   1    2.41    0.84 
  19   3   1    1.47    0.57 
 -19   3  -1    2.01    0.58 
 -20  -3  -1    8.57    1.23 
  20  -3   1    5.98    1.37 
 -20  -3  -1    6.21    1.09 
  20  -3   1    3.97    1.15 
 -20  -3  -1    7.14    0.96 
 -20   3  -1    6.86    1.04 
  20   3   1    6.40    0.94 
  20   3   1    5.69    1.01 
 -20   3  -1    7.14    1.07 
  20   3   1    3.59    1.19 
  20   3   1    4.29    0.99 
 -21  -3  -1    2.12    0.67 
  21  -3   1    0.70    0.80 
  21  -3   1    1.05    0.73 
 -21  -3  -1    2.38    0.68 
 -21   3  -1    1.64    0.53 
  21   3   1    1.62    0.87 
  21   3   1    2.29    0.74 
  21   3   1    1.19    0.51 
  21   3   1    1.78    0.61 
 -21   3  -1    1.21    0.51 
  22  -3   1    0.77    0.90 
  22  -3   1    0.50    0.65 
 -22  -3  -1    0.65    0.45 
  22   3   1    0.65    0.48 
  22   3   1    0.96    0.86 
 -22   3  -1    1.46    0.57 
  22   3   1    1.23    0.66 
 -22   3  -1    0.38    0.40 
  23  -3   1   -0.43    0.87 
 -23  -3  -1    0.82    0.51 
  23  -3   1   -0.34    0.61 
  23   3   1    0.38    0.91 
 -23   3  -1    0.21    0.46 
  23   3   1    1.72    0.63 
 -23   3  -1    0.34    0.50 
 -24  -3  -1    0.15    0.45 
  24  -3   1    0.26    0.94 
  24  -3   1   -0.60    0.66 
  24   3   1   -0.59    0.46 
  24   3   1    0.18    1.00 
 -24   3  -1    0.57    0.55 
 -24   3  -1   -0.19    0.38 
  24  -4  -1    0.43    0.84 
  24  -4  -1   -0.11    0.89 
 -24  -4   1    1.53    0.63 
  24  -4  -1    0.49    0.60 
 -24   4   1    0.65    0.51 
  24   4  -1    0.63    0.60 
  24   4  -1    0.10    1.06 
 -23  -4   1    0.70    0.53 
  23  -4  -1    1.11    0.87 
  23  -4  -1    0.59    0.90 
 -23   4   1    1.67    0.61 
 -23   4   1    0.84    0.58 
  23   4  -1    0.52    0.92 
  23   4  -1    1.32    0.61 
  22  -4  -1    3.58    1.20 
  22  -4  -1    4.98    1.30 
 -22  -4   1    3.83    0.83 
  22   4  -1    3.32    1.17 
 -22   4   1    3.29    0.76 
 -22   4   1    2.44    0.74 
  22   4  -1    3.23    0.83 
  21  -4  -1    1.02    0.80 
  21  -4  -1   -0.20    0.60 
 -21  -4   1    0.41    0.51 
 -21  -4   1    0.60    0.44 
  21   4  -1    1.01    0.96 
 -21   4   1    0.33    0.46 
 -21   4   1    1.95    0.55 
  21   4  -1    0.18    0.48 
  21   4  -1    0.81    0.47 
 -20  -4   1    1.86    0.65 
 -20  -4   1    3.01    0.72 
  20  -4  -1    3.10    1.04 
  20  -4  -1    3.14    0.98 
 -20   4   1    2.59    0.64 
  20   4  -1    1.27    0.63 
  20   4  -1    4.96    1.18 
  20   4  -1    2.84    0.72 
 -20   4   1    2.62    0.67 
 -19  -4   1    0.16    0.25 
 -19  -4   1    0.26    0.38 
  19  -4  -1    0.69    0.61 
  19  -4  -1    0.06    0.61 
 -19  -4   1    0.21    0.38 
  19   4  -1    0.02    0.37 
  19   4  -1   -0.50    0.36 
  19   4  -1   -0.55    0.60 
 -19   4   1    0.33    0.45 
 -19   4   1   -0.29    0.30 
  19   4  -1    0.62    0.40 
  18  -4  -1    1.62    0.81 
 -18  -4   1    3.05    0.52 
 -18  -4   1    2.61    0.65 
  18  -4  -1    1.83    0.74 
 -18  -4   1    3.19    0.70 
 -18   4   1    2.50    0.61 
 -18   4   1    1.33    0.53 
  18   4  -1    2.69    0.61 
  18   4  -1    2.13    0.55 
  18   4  -1    2.17    0.89 
  18   4  -1    2.87    0.71 
 -17  -4   1   33.99    3.09 
 -17  -4   1   32.79    3.58 
  17  -4  -1   27.77    3.44 
 -17  -4   1   32.70    3.37 
  17  -4  -1   26.83    3.43 
  17   4  -1   27.55    3.03 
 -17   4   1   27.90    3.36 
  17   4  -1   28.26    3.14 
  17   4  -1   27.56    3.21 
  17   4  -1   25.42    3.59 
 -17   4   1   27.28    3.19 
 -16  -4   1   17.81    1.99 
  16  -4  -1   13.91    2.20 
 -16  -4   1   18.14    1.76 
  16  -4  -1   14.05    2.16 
 -16  -4   1   17.81    2.08 
  16   4  -1   13.15    2.17 
  16   4  -1   16.98    1.82 
 -16   4   1   13.73    1.94 
 -16   4   1   14.13    1.95 
  16   4  -1   16.68    2.02 
  15  -4  -1    8.14    1.51 
 -15  -4   1   12.96    1.45 
 -15  -4   1   10.89    1.48 
  15  -4  -1   10.38    1.49 
 -15  -4   1    9.55    1.39 
  15  -4  -1    9.09    1.59 
 -15  -4   1   10.01    1.16 
 -15   4   1    9.10    1.35 
 -15   4   1   10.21    1.43 
  15   4  -1   11.61    1.47 
  15   4  -1    9.67    1.29 
  15   4  -1   10.86    1.66 
  15   4  -1   10.68    1.21 
  14  -4  -1    0.54    0.52 
  14  -4  -1    0.69    0.50 
  14  -4  -1    0.45    0.37 
 -14  -4   1    1.54    0.48 
 -14  -4   1    2.20    0.48 
 -14  -4   1    0.89    0.39 
 -14  -4   1    2.57    0.39 
 -14   4   1    1.19    0.40 
  14   4  -1    1.38    0.36 
 -14   4   1    0.86    0.41 
  14   4  -1    2.47    0.50 
  14   4  -1    0.70    0.40 
  14   4  -1    1.47    0.61 
 -13  -4   1    1.48    0.49 
  13  -4  -1    2.07    0.49 
  13  -4  -1    0.97    0.26 
 -13  -4   1    1.15    0.41 
 -13  -4   1    1.25    0.30 
 -13  -4   1    1.58    0.34 
 -13  -4   1    1.28    0.41 
 -13  -4   1    0.90    0.37 
  13  -4  -1    1.15    0.52 
  13  -4  -1    1.88    0.64 
  13  -4  -1    1.16    0.31 
  13   4  -1    1.97    0.54 
 -13   4   1    1.72    0.42 
 -13   4   1    2.15    0.50 
  13   4  -1    2.19    0.68 
  13   4  -1    1.04    0.37 
  13   4  -1    1.89    0.40 
 -12  -4   1    1.42    0.33 
 -12  -4   1    1.19    0.36 
 -12  -4   1    1.80    0.31 
  12  -4  -1    1.40    0.32 
  12  -4  -1    1.20    0.25 
 -12  -4   1    1.19    0.37 
  12  -4  -1    0.87    0.36 
 -12  -4   1    1.59    0.45 
  12  -4  -1    0.24    0.39 
  12  -4  -1    0.17    0.35 
 -12  -4   1    1.07    0.37 
 -12   4   1    2.15    0.39 
  12   4  -1    0.94    0.26 
  12   4  -1    1.28    0.35 
 -12   4   1    1.17    0.41 
  12   4  -1    1.01    0.40 
  12   4  -1    1.37    0.58 
 -12   4   1    1.02    0.35 
  12   4  -1    1.11    0.36 
  11  -4  -1    0.01    0.34 
  11  -4  -1   -0.06    0.22 
 -11  -4   1   -0.13    0.24 
 -11  -4   1    0.29    0.19 
 -11  -4   1   -0.04    0.29 
  11  -4  -1    0.12    0.17 
 -11  -4   1    0.13    0.21 
 -11  -4   1   -0.14    0.17 
 -11  -4   1    0.23    0.14 
  11  -4  -1    0.21    0.31 
  11  -4  -1    0.02    0.15 
  11  -4  -1   -0.12    0.12 
  11   4  -1   -0.15    0.18 
  11   4  -1    0.07    0.39 
 -11   4   1    0.02    0.24 
  11   4  -1    0.05    0.15 
  11   4  -1    0.33    0.30 
 -11   4   1    0.00    0.20 
 -11   4   1   -0.18    0.15 
  11   4  -1   -0.01    0.22 
 -10  -4   1    3.52    0.60 
  10  -4  -1    3.04    0.32 
  10  -4  -1    3.59    0.52 
 -10  -4   1    2.68    0.56 
  10  -4  -1    3.01    0.67 
  10  -4  -1    1.96    0.54 
  10  -4  -1    3.29    0.40 
  10  -4  -1    3.73    0.34 
  10  -4  -1    3.40    0.52 
  10  -4  -1    2.68    0.66 
 -10  -4   1    1.91    0.52 
 -10  -4   1    3.91    0.53 
 -10  -4   1    4.43    0.72 
  10   4  -1    3.00    0.56 
  10   4  -1    3.01    0.66 
  10   4  -1    2.57    0.60 
 -10   4   1    2.26    0.52 
 -10   4   1    3.40    0.60 
  10   4  -1    3.66    0.47 
 -10   4   1    3.57    0.53 
  10   4  -1    3.54    0.55 
   9  -4  -1   12.20    1.18 
   9  -4  -1    9.54    1.44 
   9  -4  -1   11.97    1.40 
   9  -4  -1   12.43    1.20 
  -9  -4   1   13.45    1.54 
  -9  -4   1    9.76    1.50 
   9  -4  -1   14.40    1.56 
  -9  -4   1   12.58    1.48 
   9  -4  -1   10.98    1.47 
  -9  -4   1   11.67    1.48 
   9  -4  -1   13.01    1.50 
   9  -4  -1   12.35    1.16 
  -9  -4   1   16.22    1.38 
   9   4  -1   12.55    1.23 
   9   4  -1    9.77    1.49 
  -9   4   1   12.94    1.44 
  -9   4   1   12.13    1.46 
   9   4  -1   12.16    1.39 
   9   4  -1   13.33    1.36 
  -9   4   1   12.85    1.48 
   8  -4  -1   11.96    1.30 
   8  -4  -1   11.12    1.58 
   8  -4  -1   14.74    1.29 
  -8  -4   1   11.89    1.64 
   8  -4  -1   15.26    1.54 
  -8  -4   1   17.12    1.48 
   8  -4  -1   12.54    1.28 
  -8  -4   1   10.76    1.58 
   8  -4  -1   11.92    1.54 
  -8  -4   1   12.79    1.59 
  -8  -4   1   13.64    1.61 
   8  -4  -1   15.22    1.66 
   8  -4  -1   16.43    1.60 
  -8   4   1   14.78    1.59 
   8   4  -1   11.46    1.47 
   8   4  -1   12.10    1.43 
   8   4  -1   14.37    1.34 
  -8   4   1   10.35    1.58 
  -8   4   1   17.53    1.58 
   8   4  -1   14.55    1.59 
   7  -4  -1   17.31    1.47 
   7  -4  -1   17.39    1.72 
   7  -4  -1   13.65    1.45 
   7  -4  -1   16.65    1.78 
  -7  -4   1   14.40    1.62 
   7  -4  -1   11.37    1.72 
  -7  -4   1   14.46    1.77 
  -7  -4   1   13.98    1.67 
   7  -4  -1   17.04    1.45 
  -7  -4   1   14.07    1.82 
   7  -4  -1   13.95    1.76 
   7  -4  -1   17.67    1.45 
   7  -4  -1   13.50    1.68 
   7   4  -1   13.01    1.62 
   7   4  -1   13.37    1.48 
   7   4  -1   11.64    1.68 
   7   4  -1   15.76    1.61 
  -7   4   1   17.84    1.73 
  -7   4   1   12.49    1.72 
  -7   4   1   14.62    1.78 
   6  -4  -1    3.72    0.69 
   6  -4  -1    4.07    0.44 
   6  -4  -1    3.62    0.58 
  -6  -4   1    3.47    0.67 
  -6  -4   1    4.06    0.65 
   6  -4  -1    5.47    0.46 
   6  -4  -1    4.97    0.58 
  -6  -4   1    3.05    0.61 
   6  -4  -1    4.70    0.70 
   6  -4  -1    4.31    0.64 
  -6  -4   1    3.48    0.67 
   6  -4  -1    4.45    0.47 
  -6  -4   1    3.58    0.64 
   6   4  -1    4.02    0.64 
  -6   4   1    3.87    0.60 
  -6   4   1    4.24    0.66 
  -6   4   1    4.30    0.70 
   6   4  -1    4.83    0.64 
   6   4  -1    4.18    0.65 
   6   4  -1    5.28    0.58 
  -5  -4   1   20.37    2.52 
  -5  -4   1   16.55    2.51 
  -5  -4   1   23.41    2.53 
  -5  -4   1   25.94    2.66 
   5  -4  -1   24.04    2.50 
   5  -4  -1   20.73    2.16 
   5  -4  -1   24.87    2.50 
   5  -4  -1   22.72    2.17 
   5  -4  -1   22.24    2.54 
  -5  -4   1   25.39    2.31 
   5  -4  -1   23.21    2.39 
   5  -4  -1   22.26    2.60 
  -5   4   1   23.19    2.43 
   5   4  -1   22.67    2.27 
  -5   4   1   22.10    2.61 
   5   4  -1   23.80    2.17 
   5   4  -1   24.21    2.39 
   5   4  -1   22.28    2.30 
  -4  -4   1    1.09    0.30 
   4  -4  -1    1.25    0.19 
   4  -4  -1    0.77    0.30 
   4  -4  -1    1.21    0.26 
   4  -4  -1    1.66    0.36 
  -4  -4   1    0.98    0.32 
  -4  -4   1    0.85    0.30 
  -4  -4   1    0.53    0.24 
  -4  -4   1    0.97    0.27 
   4  -4  -1    1.18    0.20 
   4  -4  -1    0.94    0.22 
  -4  -4   1    1.23    0.24 
   4  -4  -1    1.40    0.26 
   4   4  -1    0.68    0.27 
   4   4  -1    1.69    0.30 
   4   4  -1    1.29    0.24 
  -4   4   1    0.99    0.24 
   4   4  -1    1.57    0.40 
  -4   4   1    1.26    0.23 
   3  -4  -1   11.33    1.51 
  -3  -4   1   12.96    1.51 
   3  -4  -1   16.40    1.55 
   3  -4  -1   12.38    1.36 
  -3  -4   1   12.87    1.40 
  -3  -4   1   13.37    1.37 
  -3  -4   1    9.02    1.47 
   3  -4  -1   14.17    1.30 
   3  -4  -1   15.02    1.49 
   3  -4  -1   12.77    1.28 
  -3  -4   1   12.63    1.54 
   3   4  -1   12.53    1.36 
   3   4  -1   13.89    1.29 
   3   4  -1   12.97    1.34 
   3   4  -1   11.72    1.35 
   2  -4  -1    3.50    0.35 
   2  -4  -1    3.12    0.42 
  -2  -4   1    3.79    0.52 
   2  -4  -1    3.10    0.48 
   2  -4  -1    3.34    0.52 
   2  -4  -1    2.95    0.46 
  -2  -4   1    2.90    0.45 
  -2  -4   1    2.23    0.48 
  -2  -4   1    3.75    0.52 
  -2  -4   1    3.24    0.56 
   2  -4  -1    2.75    0.52 
   2  -4  -1    2.50    0.45 
   2  -4  -1    3.38    0.49 
   2  -4  -1    2.27    0.47 
  -2  -4   1    2.45    0.44 
   2   4  -1    3.46    0.46 
  -2   4   1    2.60    0.38 
   2   4  -1    3.40    0.38 
   2   4  -1    2.92    0.44 
   2   4  -1    3.10    0.42 
  -2   4   1    3.36    0.36 
  -1  -4   1   46.32    4.62 
  -1  -4   1   35.53    4.29 
  -1  -4   1   44.80    4.21 
  -1  -4   1   40.86    3.90 
   1  -4  -1   45.01    4.60 
   1  -4  -1   47.79    4.62 
   1  -4  -1   39.91    3.87 
   1  -4  -1   33.28    4.35 
  -1  -4   1   46.41    4.43 
   1  -4  -1   37.69    4.20 
  -1  -4   1   45.05    4.42 
   1  -4  -1   39.41    4.38 
   1  -4  -1   39.31    4.31 
   1  -4  -1   44.59    4.41 
  -1  -4   1   42.15    4.40 
   1   4  -1   36.34    3.87 
   1   4  -1   38.94    4.03 
   1   4  -1   39.44    3.89 
  -1   4   1   35.72    3.76 
   1   4  -1   41.96    3.79 
  -1   4   1   36.91    3.86 
   0  -4   1   18.67    2.15 
   0  -4   1   22.65    2.22 
   0  -4   1   20.29    1.95 
   0  -4  -1   19.07    2.17 
   0  -4  -1   16.67    2.26 
   0  -4   1   19.38    2.28 
   0  -4   1   19.46    2.22 
   0  -4   1   19.18    2.19 
   0  -4  -1   18.15    2.08 
   0  -4  -1   22.41    2.19 
   0  -4   1   19.15    2.10 
   0  -4  -1   20.13    1.94 
   0  -4  -1   18.02    2.20 
   0   4  -1   19.45    1.92 
   0   4  -1   20.62    1.93 
   0   4   1   18.76    1.87 
   0   4   1   20.37    1.92 
   0   4  -1   22.37    1.89 
   0   4   1   19.47    1.91 
   1  -4   1   19.24    2.00 
  -1  -4  -1   21.75    2.27 
   1  -4   1   23.18    2.33 
   1  -4   1   21.02    2.21 
   1  -4   1   18.32    2.27 
  -1  -4  -1   20.93    2.31 
  -1  -4  -1   23.03    2.28 
   1  -4   1   17.57    2.36 
  -1  -4  -1   16.96    2.14 
  -1  -4  -1   17.89    2.01 
   1  -4   1   22.84    2.25 
   1  -4   1   23.76    2.30 
  -1  -4  -1   24.35    2.39 
   1   4   1   20.56    2.00 
   1   4   1   20.26    1.95 
  -1   4  -1   19.10    1.98 
  -1   4  -1   21.48    2.05 
  -1   4  -1   18.02    1.97 
   1   4   1   20.64    2.01 
  -1   4  -1   21.14    1.96 
  -2  -4  -1   37.73    4.13 
  -2  -4  -1   35.39    3.95 
   2  -4   1   34.11    3.85 
  -2  -4  -1   34.25    3.88 
  -2  -4  -1   37.81    3.51 
   2  -4   1   32.34    3.93 
   2  -4   1   35.24    3.46 
   2  -4   1   32.09    3.79 
  -2  -4  -1   33.12    3.71 
  -2  -4  -1   44.32    3.96 
   2  -4   1   34.97    3.46 
   2  -4   1   38.92    3.94 
  -2   4  -1   35.11    3.38 
  -2   4  -1   39.60    3.44 
  -2   4  -1   38.27    3.44 
   2   4   1   34.14    3.47 
   2   4   1   33.75    3.49 
   2   4   1   38.00    3.38 
  -2   4  -1   37.50    3.64 
   2   4   1   35.36    3.62 
  -3  -4  -1    2.75    0.51 
   3  -4   1    1.93    0.40 
  -3  -4  -1    2.36    0.42 
  -3  -4  -1    2.37    0.44 
   3  -4   1    1.86    0.31 
   3  -4   1    2.50    0.48 
  -3  -4  -1    2.33    0.35 
  -3  -4  -1    2.97    0.45 
   3  -4   1    2.67    0.36 
  -3  -4  -1    2.50    0.34 
   3  -4   1    2.47    0.50 
   3  -4   1    2.74    0.36 
  -3  -4  -1    2.86    0.52 
   3   4   1    2.18    0.39 
  -3   4  -1    3.11    0.46 
  -3   4  -1    2.86    0.38 
   3   4   1    1.83    0.36 
  -3   4  -1    2.97    0.46 
   3   4   1    2.68    0.37 
  -3   4  -1    3.48    0.40 
  -3   4  -1    3.05    0.29 
   3   4   1    3.08    0.38 
   4  -4   1    4.18    0.65 
   4  -4   1    3.32    0.54 
   4  -4   1    3.38    0.40 
  -4  -4  -1    4.25    0.59 
   4  -4   1    3.57    0.45 
  -4  -4  -1    5.43    0.48 
  -4  -4  -1    3.40    0.57 
  -4  -4  -1    4.94    0.68 
  -4  -4  -1    3.71    0.64 
  -4  -4  -1    2.94    0.48 
  -4  -4  -1    4.14    0.58 
   4  -4   1    4.18    0.53 
   4  -4   1    3.54    0.62 
   4   4   1    4.36    0.49 
  -4   4  -1    4.06    0.48 
  -4   4  -1    4.03    0.58 
   4   4   1    4.04    0.55 
  -4   4  -1    3.14    0.56 
   4   4   1    2.99    0.52 
   4   4   1    3.13    0.51 
   5  -4   1    2.61    0.43 
  -5  -4  -1    3.41    0.49 
  -5  -4  -1    3.00    0.48 
  -5  -4  -1    2.69    0.54 
   5  -4   1    3.07    0.53 
   5  -4   1    2.95    0.34 
   5  -4   1    2.86    0.46 
   5  -4   1    2.60    0.54 
  -5  -4  -1    1.17    0.42 
  -5  -4  -1    2.41    0.47 
  -5   4  -1    2.69    0.45 
  -5   4  -1    2.31    0.34 
  -5   4  -1    2.10    0.43 
   5   4   1    3.03    0.39 
   5   4   1    3.06    0.47 
  -5   4  -1    3.26    0.59 
   5   4   1    3.31    0.48 
   5   4   1    2.51    0.42 
   6  -4   1   31.43    3.32 
  -6  -4  -1   25.71    3.28 
  -6  -4  -1   36.23    3.14 
   6  -4   1   33.24    3.28 
   6  -4   1   26.63    2.82 
  -6  -4  -1   32.50    3.00 
   6  -4   1   32.33    3.15 
  -6  -4  -1   31.31    3.33 
  -6  -4  -1   24.04    3.44 
   6  -4   1   30.23    3.26 
  -6   4  -1   28.81    2.80 
   6   4   1   29.53    2.98 
  -6   4  -1   33.79    3.21 
  -6   4  -1   27.88    3.44 
   6   4   1   27.28    3.13 
   6   4   1   30.37    2.83 
  -6   4  -1   35.35    3.30 
  -6   4  -1   29.48    3.28 
   6   4   1   29.83    2.94 
   7  -4   1    0.25    0.17 
   7  -4   1    0.08    0.06 
   7  -4   1    0.64    0.29 
  -7  -4  -1    0.04    0.21 
  -7  -4  -1    0.35    0.22 
   7  -4   1   -0.02    0.29 
  -7  -4  -1    0.32    0.23 
  -7  -4  -1   -0.14    0.22 
   7  -4   1    0.08    0.07 
  -7  -4  -1    0.46    0.20 
   7  -4   1    0.24    0.24 
  -7   4  -1    0.01    0.17 
   7   4   1   -0.06    0.24 
  -7   4  -1    0.29    0.17 
   7   4   1   -0.16    0.22 
  -7   4  -1   -0.24    0.09 
  -7   4  -1    0.16    0.20 
  -7   4  -1    0.24    0.26 
   7   4   1    0.39    0.22 
  -8  -4  -1  132.43   13.01 
  -8  -4  -1  137.31   13.70 
   8  -4   1  114.31   12.87 
  -8  -4  -1  107.23   12.25 
   8  -4   1  129.47   12.52 
   8  -4   1  125.08   12.29 
  -8  -4  -1  104.62   12.72 
  -8  -4  -1  116.61   12.85 
   8   4   1  131.53   11.50 
   8   4   1  113.49   11.58 
  -8   4  -1  127.58   12.95 
   8   4   1  116.90   12.28 
  -8   4  -1  115.24   12.87 
  -8   4  -1  134.50   12.27 
  -9  -4  -1    3.99    0.73 
  -9  -4  -1    3.20    0.59 
  -9  -4  -1    3.66    0.61 
   9  -4   1    2.84    0.63 
  -9  -4  -1    3.51    0.54 
   9  -4   1    2.81    0.59 
  -9  -4  -1    3.31    0.60 
   9  -4   1    3.77    0.72 
   9  -4   1    4.01    0.56 
   9   4   1    3.03    0.53 
  -9   4  -1    2.83    0.56 
   9   4   1    4.32    0.63 
  -9   4  -1    3.80    0.64 
  -9   4  -1    2.65    0.53 
   9   4   1    3.11    0.64 
  -9   4  -1    3.17    0.57 
 -10  -4  -1   43.84    4.74 
  10  -4   1   41.63    4.45 
  10  -4   1   38.83    4.34 
 -10  -4  -1   35.85    4.23 
 -10  -4  -1   36.98    4.51 
  10  -4   1   39.17    4.42 
 -10  -4  -1   44.06    4.51 
  10  -4   1   34.19    4.46 
 -10  -4  -1   44.84    4.47 
  10   4   1   44.94    4.02 
 -10   4  -1   40.64    4.69 
 -10   4  -1   44.53    4.31 
  10   4   1   45.74    4.10 
  10   4   1   35.25    4.32 
 -10   4  -1   45.60    4.49 
 -11  -4  -1   16.05    2.15 
 -11  -4  -1   17.18    2.20 
  11  -4   1   19.53    2.15 
  11  -4   1   18.69    1.79 
 -11  -4  -1   24.05    2.11 
  11  -4   1   20.57    2.28 
 -11  -4  -1   19.47    2.31 
  11  -4   1   17.59    2.19 
  11  -4   1   17.08    2.19 
 -11   4  -1   19.51    2.19 
  11   4   1   18.63    2.03 
  11   4   1   16.62    2.20 
 -11   4  -1   20.03    2.14 
 -11   4  -1   15.92    2.24 
  11   4   1   22.71    2.03 
  11   4   1   21.77    2.00 
  12  -4   1   -0.01    0.33 
  12  -4   1    1.11    0.39 
 -12  -4  -1    1.57    0.40 
 -12  -4  -1    0.53    0.30 
  12  -4   1    0.79    0.13 
 -12  -4  -1    0.55    0.32 
 -12  -4  -1    0.42    0.37 
 -12  -4  -1    0.97    0.33 
  12  -4   1    1.08    0.48 
  12  -4   1    0.78    0.29 
  12   4   1    0.19    0.29 
  12   4   1    1.23    0.35 
  12   4   1    0.26    0.42 
 -12   4  -1    0.49    0.30 
 -12   4  -1    0.60    0.25 
  12   4   1    1.31    0.30 
 -12   4  -1    0.17    0.33 
 -13  -4  -1    8.35    1.24 
  13  -4   1    7.35    1.32 
 -13  -4  -1    8.70    0.97 
  13  -4   1    7.47    1.22 
 -13  -4  -1    8.00    1.25 
 -13  -4  -1    9.74    1.22 
  13  -4   1    9.70    1.43 
 -13  -4  -1    8.22    1.18 
 -13  -4  -1    8.33    1.13 
 -13   4  -1    8.95    1.22 
  13   4   1    8.78    1.01 
  13   4   1    7.97    1.09 
  13   4   1    7.18    1.31 
 -13   4  -1    9.07    1.23 
 -13   4  -1   10.20    1.19 
  13   4   1    7.83    1.15 
  14  -4   1    2.37    0.70 
 -14  -4  -1    1.82    0.49 
  14  -4   1    2.23    0.55 
 -14  -4  -1    2.50    0.40 
 -14  -4  -1    2.39    0.49 
 -14  -4  -1    1.67    0.53 
 -14  -4  -1    2.08    0.52 
  14  -4   1    2.13    0.69 
  14   4   1    1.57    0.46 
 -14   4  -1    2.06    0.54 
  14   4   1    2.09    0.75 
  14   4   1    2.03    0.42 
 -14   4  -1    2.68    0.57 
  14   4   1    3.30    0.54 
  14   4   1    1.31    0.48 
  15  -4   1    6.31    1.01 
 -15  -4  -1    6.68    1.03 
 -15  -4  -1    6.30    1.03 
  15  -4   1    5.36    1.13 
 -15  -4  -1    4.64    0.88 
 -15  -4  -1    6.92    0.74 
  15  -4   1    3.89    1.02 
  15   4   1    4.62    1.09 
  15   4   1    5.31    0.77 
  15   4   1    6.51    0.99 
  15   4   1    6.58    0.90 
 -15   4  -1    5.27    0.91 
  15   4   1    6.03    0.88 
 -15   4  -1    5.73    0.94 
 -16  -4  -1   11.74    1.73 
  16  -4   1   10.74    1.86 
 -16  -4  -1   13.38    1.47 
  16  -4   1   12.87    1.94 
  16  -4   1   13.32    1.68 
 -16  -4  -1   11.93    1.71 
 -16   4  -1   12.59    1.68 
  16   4   1   13.02    1.68 
  16   4   1   13.81    1.50 
  16   4   1   14.30    1.57 
 -16   4  -1   12.76    1.65 
  16   4   1   12.55    1.93 
  17  -4   1   12.13    1.85 
  17  -4   1   15.18    2.12 
 -17  -4  -1   15.08    1.84 
 -17  -4  -1   11.98    1.82 
  17  -4   1   12.52    2.00 
  17   4   1   12.70    1.72 
  17   4   1   15.07    1.68 
  17   4   1   12.97    2.03 
  17   4   1   12.94    1.63 
 -17   4  -1   15.15    1.81 
 -17   4  -1   13.17    1.72 
  18  -4   1    3.08    0.81 
  18  -4   1    4.18    1.09 
  18  -4   1    6.11    1.21 
 -18  -4  -1    5.54    0.93 
 -18  -4  -1    3.53    0.85 
  18   4   1    3.43    0.83 
  18   4   1    3.82    1.11 
  18   4   1    6.00    0.91 
 -18   4  -1    3.90    0.80 
 -18   4  -1    5.31    0.89 
  18   4   1    3.76    0.73 
 -19  -4  -1    0.23    0.36 
  19  -4   1   -0.20    0.55 
 -19  -4  -1    0.37    0.42 
  19  -4   1    0.46    0.42 
  19  -4   1   -0.66    0.49 
  19   4   1    0.43    0.44 
 -19   4  -1    0.24    0.43 
  19   4   1   -0.04    0.36 
 -19   4  -1    0.40    0.36 
  19   4   1   -0.08    0.61 
  19   4   1   -0.22    0.31 
 -20  -4  -1    0.64    0.43 
 -20  -4  -1   -0.22    0.35 
  20  -4   1   -0.29    0.37 
  20  -4   1    1.20    0.73 
  20  -4   1   -0.46    0.62 
  20   4   1    0.19    0.79 
 -20   4  -1   -0.01    0.35 
  20   4   1   -0.35    0.39 
 -20   4  -1    0.04    0.42 
  21  -4   1   -1.04    0.51 
  21  -4   1   -0.46    0.37 
  21  -4   1   -0.41    0.59 
 -21  -4  -1   -0.40    0.39 
 -21  -4  -1    0.32    0.41 
  21   4   1   -0.89    0.60 
 -21   4  -1    0.57    0.41 
 -21   4  -1    0.19    0.45 
  21   4   1    0.25    0.46 
  22  -4   1    0.25    0.47 
 -22  -4  -1    1.58    0.63 
 -22  -4  -1    2.03    0.72 
  22  -4   1    0.79    0.95 
  22  -4   1    1.97    1.00 
 -22   4  -1    1.76    0.58 
  22   4   1    0.76    0.57 
 -22   4  -1    1.95    0.61 
  22   4   1    0.84    1.05 
  23  -4   1    4.69    1.24 
  23  -4   1    1.55    1.12 
  23  -4   1    2.79    0.86 
 -23  -4  -1    4.87    0.95 
 -23   4  -1    2.67    0.77 
 -23   4  -1    2.82    0.84 
  23   4   1    1.51    1.21 
  23   4   1    2.64    0.84 
  24  -4   1   -0.29    0.80 
  24   4   1   -0.32    0.87 
  23  -5  -1    0.45    0.67 
  23  -5  -1   -0.36    0.45 
 -23  -5   1   -0.30    0.44 
  23  -5  -1   -0.06    0.80 
 -23   5   1   -0.38    0.42 
  23   5  -1    0.57    0.87 
  23   5  -1    0.42    0.57 
 -23   5   1    1.04    0.57 
  22  -5  -1    2.65    1.11 
  22  -5  -1    1.86    1.04 
  22  -5  -1    3.39    0.97 
 -22  -5   1    5.14    1.03 
 -22   5   1    3.61    0.87 
  22   5  -1    4.61    1.36 
 -22   5   1    5.48    1.03 
  22   5  -1    4.71    1.02 
 -21  -5   1    5.52    1.08 
  21  -5  -1    5.86    1.20 
 -21  -5   1    5.84    1.14 
  21  -5  -1    6.00    1.42 
  21  -5  -1    6.61    1.43 
  21   5  -1    3.93    1.30 
  21   5  -1    5.80    1.16 
 -21   5   1    6.80    1.19 
 -21   5   1    7.14    1.13 
  20  -5  -1    0.72    0.83 
  20  -5  -1    0.81    0.65 
  20  -5  -1    0.01    0.46 
 -20  -5   1    0.86    0.51 
 -20  -5   1    0.53    0.48 
  20   5  -1    0.55    0.55 
 -20   5   1    1.77    0.63 
  20   5  -1    0.59    0.85 
 -20   5   1   -0.29    0.37 
  19  -5  -1   17.20    2.59 
  19  -5  -1   16.68    2.42 
 -19  -5   1   16.73    2.34 
 -19  -5   1   17.01    2.22 
  19  -5  -1   19.00    2.64 
 -19   5   1   21.05    2.19 
 -19   5   1   16.50    2.23 
  19   5  -1   21.30    2.21 
  19   5  -1   17.74    2.61 
  18  -5  -1    0.19    0.51 
  18  -5  -1    0.00    0.33 
  18  -5  -1   -0.23    0.56 
 -18  -5   1    0.13    0.40 
 -18  -5   1    0.11    0.41 
 -18   5   1    0.73    0.50 
  18   5  -1    0.49    0.45 
 -18   5   1    0.29    0.41 
  18   5  -1    0.71    0.63 
  17  -5  -1   -0.58    0.45 
 -17  -5   1    0.70    0.41 
  17  -5  -1    1.90    0.76 
 -17  -5   1    0.45    0.42 
  17  -5  -1    1.02    0.49 
 -17  -5   1    0.72    0.46 
 -17   5   1    1.24    0.52 
  17   5  -1    0.69    0.64 
 -17   5   1    0.50    0.41 
  17   5  -1    0.03    0.42 
  17   5  -1    0.49    0.44 
  16  -5  -1    5.06    0.93 
 -16  -5   1    3.71    0.83 
  16  -5  -1    2.93    0.92 
 -16  -5   1    3.99    0.80 
 -16  -5   1    3.55    0.77 
  16  -5  -1    4.61    1.00 
  16   5  -1    2.88    0.99 
 -16   5   1    4.15    0.82 
  16   5  -1    3.99    0.74 
  16   5  -1    5.74    0.75 
 -16   5   1    4.49    0.83 
  16   5  -1    3.31    0.80 
  15  -5  -1    0.18    0.48 
  15  -5  -1    0.32    0.35 
 -15  -5   1    0.48    0.34 
 -15  -5   1   -0.03    0.31 
 -15  -5   1    0.80    0.41 
  15  -5  -1   -0.19    0.42 
 -15   5   1    0.63    0.39 
  15   5  -1   -0.79    0.32 
  15   5  -1    1.48    0.43 
  15   5  -1    0.54    0.58 
 -15   5   1    0.14    0.35 
  15   5  -1    0.15    0.29 
 -14  -5   1    7.61    1.28 
  14  -5  -1    8.12    1.41 
 -14  -5   1   10.54    1.30 
 -14  -5   1    9.48    1.31 
  14  -5  -1    7.52    1.36 
  14  -5  -1    8.37    1.31 
 -14   5   1    8.77    1.24 
  14   5  -1    7.22    1.19 
  14   5  -1    8.09    1.15 
  14   5  -1    9.00    1.13 
  14   5  -1    9.36    1.49 
 -14   5   1    8.08    1.26 
  13  -5  -1   19.82    2.51 
  13  -5  -1   21.86    2.57 
 -13  -5   1   24.02    2.52 
  13  -5  -1   18.89    2.55 
 -13  -5   1   27.03    2.68 
 -13  -5   1   15.69    2.29 
  13   5  -1   19.59    2.54 
  13   5  -1   23.25    2.30 
  13   5  -1   23.65    2.32 
  13   5  -1   20.50    2.35 
 -13   5   1   21.59    2.41 
 -13   5   1   22.83    2.52 
 -12  -5   1    2.47    0.47 
 -12  -5   1    2.61    0.53 
 -12  -5   1    1.50    0.47 
  12  -5  -1    2.23    0.57 
  12  -5  -1    0.98    0.49 
  12  -5  -1    1.66    0.58 
 -12  -5   1    1.59    0.49 
 -12  -5   1    3.06    0.65 
 -12   5   1    1.44    0.45 
  12   5  -1    1.92    0.45 
  12   5  -1    1.92    0.52 
  12   5  -1    2.90    0.41 
  12   5  -1    1.96    0.48 
  12   5  -1    2.43    0.66 
 -12   5   1    2.70    0.58 
  11  -5  -1    0.03    0.17 
  11  -5  -1   -0.23    0.29 
 -11  -5   1    0.15    0.19 
 -11  -5   1    0.69    0.38 
 -11  -5   1    0.05    0.25 
  11  -5  -1    0.09    0.28 
  11  -5  -1    0.10    0.34 
 -11  -5   1    0.15    0.27 
 -11  -5   1    0.25    0.26 
  11   5  -1    0.51    0.35 
 -11   5   1    0.53    0.37 
  11   5  -1   -0.08    0.23 
 -11   5   1    0.07    0.27 
  11   5  -1    0.22    0.23 
  11   5  -1    0.11    0.18 
  11   5  -1   -0.04    0.40 
  10  -5  -1    3.35    0.63 
  10  -5  -1    3.59    0.52 
 -10  -5   1    3.64    0.63 
 -10  -5   1    3.04    0.58 
 -10  -5   1    2.10    0.53 
  10  -5  -1    2.72    0.31 
  10  -5  -1    3.50    0.75 
 -10  -5   1    2.22    0.46 
  10  -5  -1    3.51    0.68 
  10  -5  -1    2.58    0.30 
 -10  -5   1    3.15    0.69 
  10   5  -1    2.00    0.48 
 -10   5   1    3.71    0.62 
  10   5  -1    1.44    0.54 
  10   5  -1    3.23    0.62 
 -10   5   1    2.84    0.59 
 -10   5   1    2.92    0.51 
  10   5  -1    2.69    0.43 
  10   5  -1    4.20    0.60 
  -9  -5   1    9.90    1.22 
   9  -5  -1   10.02    0.90 
  -9  -5   1   10.12    1.08 
  -9  -5   1   11.42    1.40 
   9  -5  -1    8.41    1.29 
   9  -5  -1    8.93    0.90 
   9  -5  -1    8.96    1.10 
   9  -5  -1    8.01    1.20 
  -9  -5   1    8.28    1.25 
   9  -5  -1    7.22    1.28 
  -9  -5   1    7.92    1.26 
   9  -5  -1    7.42    1.14 
   9   5  -1    8.98    0.97 
   9   5  -1   10.58    1.30 
   9   5  -1    9.42    1.09 
   9   5  -1   11.27    1.28 
  -9   5   1    9.61    1.26 
   9   5  -1    9.83    1.16 
  -9   5   1    8.70    1.15 
  -9   5   1    9.09    1.16 
   8  -5  -1    0.19    0.10 
   8  -5  -1    0.26    0.19 
   8  -5  -1   -0.43    0.22 
   8  -5  -1   -0.09    0.24 
  -8  -5   1   -0.19    0.21 
  -8  -5   1    0.17    0.24 
   8  -5  -1    0.28    0.26 
  -8  -5   1    0.11    0.20 
   8  -5  -1    0.18    0.12 
  -8  -5   1    0.21    0.29 
   8  -5  -1    0.17    0.09 
   8  -5  -1    0.07    0.07 
  -8  -5   1    0.38    0.26 
   8  -5  -1    0.30    0.19 
   8   5  -1    0.17    0.17 
   8   5  -1    0.37    0.24 
  -8   5   1   -0.04    0.14 
  -8   5   1    0.38    0.31 
  -8   5   1   -0.13    0.16 
   8   5  -1    0.35    0.28 
   8   5  -1    0.09    0.21 
   8   5  -1    0.20    0.27 
  -7  -5   1   28.47    3.99 
  -7  -5   1   44.60    3.90 
   7  -5  -1   34.23    3.28 
   7  -5  -1   40.78    3.28 
   7  -5  -1   30.31    3.82 
   7  -5  -1   38.41    3.96 
  -7  -5   1   35.01    3.85 
   7  -5  -1   31.04    3.76 
   7  -5  -1   34.77    3.62 
   7  -5  -1   32.86    3.29 
   7  -5  -1   35.15    3.76 
  -7  -5   1   30.98    3.79 
   7   5  -1   36.01    3.56 
  -7   5   1   31.01    3.77 
  -7   5   1   35.72    3.66 
  -7   5   1   31.86    3.96 
   7   5  -1   36.62    3.43 
   7   5  -1   38.22    3.49 
   7   5  -1   31.57    3.27 
   7   5  -1   35.17    3.63 
   6  -5  -1    2.76    0.64 
  -6  -5   1    2.76    0.58 
  -6  -5   1    3.79    0.61 
  -6  -5   1    3.49    0.67 
   6  -5  -1    2.78    0.51 
   6  -5  -1    3.52    0.44 
   6  -5  -1    3.38    0.55 
   6  -5  -1    3.55    0.54 
   6  -5  -1    3.25    0.65 
   6  -5  -1    3.54    0.39 
  -6  -5   1    3.23    0.64 
   6   5  -1    2.92    0.56 
   6   5  -1    3.15    0.56 
  -6   5   1    3.93    0.56 
   6   5  -1    4.51    0.60 
   6   5  -1    4.51    0.53 
  -6   5   1    3.59    0.60 
   6   5  -1    3.73    0.57 
  -6   5   1    1.98    0.54 
  -5  -5   1   22.71    2.16 
   5  -5  -1   17.53    1.74 
  -5  -5   1   18.83    2.08 
   5  -5  -1   20.36    1.91 
   5  -5  -1   15.15    2.07 
  -5  -5   1   17.09    1.89 
   5  -5  -1   13.74    2.07 
   5  -5  -1   19.43    2.06 
  -5  -5   1   18.35    2.14 
   5  -5  -1   17.48    2.01 
  -5  -5   1   16.34    2.06 
   5  -5  -1   17.63    2.10 
   5  -5  -1   18.44    1.76 
   5   5  -1   16.92    1.83 
  -5   5   1   18.99    2.00 
  -5   5   1   16.28    2.02 
  -5   5   1   22.63    2.13 
   5   5  -1   16.58    1.90 
   5   5  -1   16.94    1.90 
   5   5  -1   18.13    1.76 
   5   5  -1   19.20    1.88 
  -4  -5   1    7.66    0.75 
  -4  -5   1    4.81    0.86 
   4  -5  -1    6.13    0.87 
   4  -5  -1    5.55    0.91 
  -4  -5   1    8.12    0.86 
  -4  -5   1    6.30    0.95 
  -4  -5   1    7.64    0.85 
   4  -5  -1    4.94    0.78 
   4  -5  -1    5.40    0.87 
   4  -5  -1    5.63    0.67 
   4  -5  -1    5.05    0.77 
  -4  -5   1    5.66    0.81 
   4  -5  -1    5.17    0.68 
   4   5  -1    6.34    0.73 
   4   5  -1    6.21    0.80 
  -4   5   1    5.68    0.83 
   4   5  -1    4.99    0.72 
   4   5  -1    6.86    0.85 
   4   5  -1    6.42    0.79 
  -4   5   1    6.41    0.92 
  -3  -5   1   16.22    1.79 
   3  -5  -1   12.64    1.93 
  -3  -5   1   14.43    1.90 
   3  -5  -1   16.47    1.89 
  -3  -5   1   16.40    1.97 
   3  -5  -1   19.09    1.69 
   3  -5  -1   17.75    1.90 
  -3  -5   1   17.01    1.93 
   3  -5  -1   14.97    1.65 
   3  -5  -1   15.56    1.95 
   3  -5  -1   20.13    1.92 
  -3  -5   1   16.06    1.73 
   3  -5  -1   18.20    1.91 
   3   5  -1   15.91    1.71 
   3   5  -1   15.93    1.70 
   3   5  -1   17.35    1.79 
  -3   5   1   16.24    1.85 
   3   5  -1   16.57    1.72 
  -3   5   1   19.36    1.90 
   3   5  -1   16.37    1.64 
  -2  -5   1    0.28    0.23 
  -2  -5   1    0.23    0.23 
   2  -5  -1   -0.16    0.12 
   2  -5  -1   -0.02    0.19 
   2  -5  -1   -0.07    0.14 
  -2  -5   1    0.09    0.22 
   2  -5  -1    0.12    0.16 
  -2  -5   1   -0.03    0.17 
  -2  -5   1    0.04    0.24 
  -2  -5   1    0.02    0.16 
   2  -5  -1    0.10    0.25 
   2  -5  -1    0.17    0.22 
   2  -5  -1   -0.12    0.13 
  -2  -5   1    0.17    0.19 
   2   5  -1   -0.09    0.16 
   2   5  -1   -0.11    0.15 
  -2   5   1    0.06    0.10 
   2   5  -1   -0.03    0.19 
   2   5  -1   -0.09    0.15 
   2   5  -1    0.04    0.05 
   1  -5  -1    0.49    0.22 
  -1  -5   1    0.73    0.25 
   1  -5  -1    1.30    0.36 
  -1  -5   1    1.15    0.28 
   1  -5  -1    0.69    0.23 
  -1  -5   1    0.54    0.30 
   1  -5  -1    0.73    0.29 
   1  -5  -1    0.79    0.28 
  -1  -5   1    1.58    0.38 
  -1  -5   1    0.96    0.32 
  -1  -5   1    1.04    0.29 
   1  -5  -1    0.92    0.25 
  -1  -5   1    0.88    0.28 
   1  -5  -1    0.15    0.18 
   1   5  -1    1.00    0.25 
  -1   5   1    0.88    0.21 
   1   5  -1    0.58    0.23 
  -1   5   1    1.33    0.22 
   1   5  -1    0.79    0.23 
   0  -5  -1   21.30    2.29 
   0  -5   1   17.77    2.32 
   0  -5  -1   20.57    2.30 
   0  -5   1   21.16    2.32 
   0  -5  -1   19.63    2.34 
   0  -5   1   22.58    2.30 
   0  -5   1   17.71    2.20 
   0  -5  -1   15.88    2.36 
   0  -5   1   22.75    2.32 
   0  -5   1   21.46    2.05 
   0  -5  -1   21.60    2.05 
   0  -5  -1   20.71    2.31 
   0   5   1   21.15    2.01 
   0   5   1   20.57    1.96 
   0   5  -1   20.94    1.98 
   0   5  -1   20.36    2.01 
   0   5  -1   21.53    2.02 
  -1  -5  -1   -0.15    0.14 
   1  -5   1    0.08    0.17 
   1  -5   1   -0.07    0.15 
   1  -5   1    0.13    0.17 
   1  -5   1    0.25    0.21 
   1  -5   1    0.00    0.17 
  -1  -5  -1   -0.11    0.16 
  -1  -5  -1    0.21    0.17 
  -1  -5  -1    0.16    0.24 
   1  -5   1   -0.05    0.20 
   1  -5   1   -0.27    0.16 
  -1  -5  -1   -0.04    0.15 
  -1  -5  -1   -0.20    0.14 
   1   5   1    0.09    0.16 
  -1   5  -1    0.11    0.13 
  -1   5  -1   -0.49    0.23 
  -1   5  -1   -0.15    0.09 
   1   5   1    0.02    0.13 
   1   5   1   -0.04    0.14 
   1   5   1    0.17    0.15 
  -1   5  -1   -0.12    0.10 
  -2  -5  -1    0.80    0.30 
   2  -5   1    0.56    0.24 
   2  -5   1    0.58    0.27 
   2  -5   1    0.18    0.20 
  -2  -5  -1    0.63    0.20 
  -2  -5  -1    0.82    0.25 
   2  -5   1    0.87    0.33 
  -2  -5  -1    0.02    0.26 
   2  -5   1    0.51    0.20 
   2  -5   1    0.71    0.23 
  -2  -5  -1    0.67    0.24 
   2  -5   1    0.59    0.26 
  -2  -5  -1    0.53    0.25 
  -2   5  -1    0.45    0.29 
  -2   5  -1    0.56    0.18 
  -2   5  -1    0.83    0.21 
  -2   5  -1    0.75    0.16 
  -2   5  -1    0.68    0.12 
   2   5   1    0.44    0.22 
   2   5   1    0.52    0.19 
   2   5   1    1.01    0.25 
   2   5   1    0.55    0.21 
   3  -5   1   11.09    1.13 
   3  -5   1   10.97    1.31 
   3  -5   1   11.51    1.31 
   3  -5   1   10.06    1.33 
  -3  -5  -1    8.73    1.38 
  -3  -5  -1   10.19    1.30 
  -3  -5  -1   10.86    1.34 
  -3  -5  -1    8.70    1.32 
   3  -5   1   11.38    1.37 
  -3  -5  -1   10.17    1.19 
  -3  -5  -1    9.10    1.17 
   3  -5   1   10.53    1.29 
   3   5   1   11.98    1.23 
  -3   5  -1   11.45    1.33 
  -3   5  -1   10.67    1.10 
   3   5   1   10.32    1.16 
   3   5   1   10.76    1.11 
  -3   5  -1   12.40    1.15 
   3   5   1   10.63    1.16 
   3   5   1   11.66    1.13 
  -3   5  -1   13.72    1.33 
  -4  -5  -1   24.67    2.88 
  -4  -5  -1   22.48    2.76 
  -4  -5  -1   25.12    2.56 
  -4  -5  -1   19.57    2.73 
  -4  -5  -1   20.76    2.55 
   4  -5   1   26.69    2.37 
   4  -5   1   23.54    2.39 
   4  -5   1   23.76    2.79 
   4  -5   1   27.81    2.76 
  -4  -5  -1   19.94    2.49 
   4  -5   1   26.45    2.74 
  -4  -5  -1   32.82    2.87 
   4  -5   1   29.19    2.53 
  -4   5  -1   23.35    2.34 
  -4   5  -1   27.97    2.75 
   4   5   1   25.43    2.48 
  -4   5  -1   25.63    2.71 
  -4   5  -1   29.27    2.90 
   4   5   1   22.57    2.52 
   4   5   1   24.99    2.57 
   4   5   1   27.03    2.46 
   4   5   1   22.20    2.35 
  -5  -5  -1   29.68    3.60 
   5  -5   1   28.87    3.19 
   5  -5   1   27.28    3.36 
   5  -5   1   33.82    3.44 
  -5  -5  -1   33.27    3.47 
   5  -5   1   31.80    2.99 
  -5  -5  -1   35.84    3.51 
   5  -5   1   33.07    2.95 
  -5  -5  -1   37.78    3.49 
   5  -5   1   29.83    3.47 
   5   5   1   30.57    3.09 
   5   5   1   31.11    3.20 
  -5   5  -1   29.44    3.42 
  -5   5  -1   26.40    3.58 
   5   5   1   35.24    2.97 
  -5   5  -1   27.59    3.31 
   5   5   1   27.68    3.04 
  -5   5  -1   30.83    2.93 
  -5   5  -1   31.14    3.41 
   5   5   1   31.51    3.21 
  -6  -5  -1    5.66    0.94 
   6  -5   1    7.35    0.88 
  -6  -5  -1    8.14    1.10 
   6  -5   1    7.54    1.08 
   6  -5   1    7.87    0.88 
  -6  -5  -1    8.40    0.87 
   6  -5   1    5.44    0.70 
  -6  -5  -1    7.87    1.06 
   6  -5   1    4.51    0.93 
  -6   5  -1    6.47    0.93 
  -6   5  -1    5.43    0.96 
  -6   5  -1    8.22    0.91 
   6   5   1    5.71    0.86 
   6   5   1    6.00    0.83 
  -6   5  -1    5.95    0.70 
   6   5   1    6.74    0.88 
  -6   5  -1    8.08    0.90 
   6   5   1    7.00    0.88 
   7  -5   1   50.92    5.01 
  -7  -5  -1   45.89    4.80 
   7  -5   1   51.95    4.82 
  -7  -5  -1   42.04    5.34 
  -7  -5  -1   51.49    5.13 
  -7  -5  -1   45.13    5.08 
  -7  -5  -1   43.23    5.05 
   7  -5   1   44.93    4.39 
   7  -5   1   53.60    5.07 
  -7   5  -1   45.36    5.10 
   7   5   1   43.28    4.56 
  -7   5  -1   46.44    5.06 
  -7   5  -1   46.18    4.87 
   7   5   1   43.78    4.80 
   7   5   1   44.59    4.51 
  -7   5  -1   47.18    4.33 
   7   5   1   47.82    4.72 
   8  -5   1    2.57    0.27 
  -8  -5  -1    3.04    0.49 
  -8  -5  -1    2.63    0.61 
  -8  -5  -1    1.89    0.49 
   8  -5   1    2.72    0.65 
  -8  -5  -1    2.01    0.48 
   8  -5   1    1.31    0.47 
   8  -5   1    2.59    0.47 
   8  -5   1    2.88    0.54 
   8  -5   1    2.45    0.29 
  -8  -5  -1    3.86    0.63 
  -8   5  -1    2.73    0.54 
   8   5   1    2.72    0.50 
   8   5   1    2.63    0.50 
   8   5   1    2.83    0.56 
  -8   5  -1    2.75    0.49 
  -8   5  -1    3.70    0.66 
   8   5   1    2.13    0.49 
   9  -5   1    1.36    0.49 
  -9  -5  -1    1.12    0.38 
  -9  -5  -1    1.39    0.39 
   9  -5   1    1.43    0.44 
  -9  -5  -1    1.13    0.43 
   9  -5   1    1.09    0.39 
  -9  -5  -1    1.81    0.44 
   9  -5   1    1.23    0.32 
  -9  -5  -1    0.30    0.27 
  -9   5  -1    1.84    0.51 
  -9   5  -1    1.02    0.33 
   9   5   1    1.47    0.36 
   9   5   1    1.06    0.37 
  -9   5  -1    0.49    0.30 
   9   5   1    1.42    0.37 
   9   5   1    1.40    0.40 
  10  -5   1    2.32    0.61 
 -10  -5  -1    3.02    0.62 
  10  -5   1    2.49    0.61 
  10  -5   1    3.41    0.55 
  10  -5   1    3.10    0.72 
 -10  -5  -1    2.65    0.53 
 -10  -5  -1    3.07    0.60 
 -10  -5  -1    4.15    0.78 
 -10  -5  -1    3.29    0.62 
 -10   5  -1    3.73    0.58 
 -10   5  -1    2.20    0.54 
  10   5   1    3.15    0.55 
  10   5   1    2.92    0.54 
  10   5   1    2.59    0.56 
 -10   5  -1    3.52    0.69 
  10   5   1    2.91    0.65 
 -11  -5  -1    3.10    0.60 
 -11  -5  -1    3.51    0.68 
  11  -5   1    2.69    0.68 
  11  -5   1    4.73    0.89 
 -11  -5  -1    3.76    0.67 
 -11  -5  -1    3.09    0.74 
 -11  -5  -1    3.95    0.69 
  11  -5   1    3.50    0.74 
 -11   5  -1    3.60    0.69 
  11   5   1    2.27    0.69 
  11   5   1    4.15    0.61 
 -11   5  -1    4.30    0.66 
 -11   5  -1    2.94    0.68 
  11   5   1    3.66    0.63 
  11   5   1    3.35    0.68 
 -12  -5  -1   21.06    1.96 
  12  -5   1   13.94    2.17 
 -12  -5  -1   21.62    2.07 
  12  -5   1   15.14    2.04 
 -12  -5  -1   10.16    2.04 
  12  -5   1   16.17    2.01 
 -12  -5  -1   16.84    2.04 
 -12  -5  -1   15.78    2.10 
  12   5   1   19.27    1.87 
 -12   5  -1   17.15    1.99 
 -12   5  -1   16.58    2.01 
  12   5   1   17.22    1.83 
  12   5   1   18.16    1.91 
  12   5   1   15.51    2.14 
  13  -5   1   -0.16    0.36 
 -13  -5  -1    0.53    0.28 
 -13  -5  -1    0.88    0.38 
 -13  -5  -1    0.31    0.31 
  13  -5   1    0.57    0.45 
  13  -5   1    0.33    0.33 
 -13  -5  -1    0.32    0.29 
 -13  -5  -1    0.03    0.33 
 -13   5  -1    0.29    0.33 
  13   5   1    0.28    0.32 
  13   5   1    0.20    0.35 
 -13   5  -1    0.02    0.32 
  13   5   1    0.42    0.49 
  13   5   1   -0.08    0.24 
 -14  -5  -1    0.63    0.34 
  14  -5   1    0.49    0.51 
 -14  -5  -1    0.37    0.35 
 -14  -5  -1    1.09    0.37 
 -14  -5  -1    0.60    0.39 
  14  -5   1    0.53    0.50 
  14  -5   1    1.24    0.48 
 -14   5  -1    0.73    0.35 
  14   5   1    0.05    0.39 
  14   5   1    0.66    0.30 
 -14   5  -1    0.57    0.44 
  14   5   1    0.32    0.33 
  14   5   1   -0.08    0.45 
  15  -5   1    1.74    0.58 
  15  -5   1    1.70    0.65 
  15  -5   1    1.05    0.56 
 -15  -5  -1    2.18    0.57 
 -15  -5  -1    1.47    0.49 
 -15  -5  -1    2.11    0.61 
  15   5   1    1.76    0.55 
  15   5   1    0.41    0.50 
 -15   5  -1    2.14    0.56 
  15   5   1    1.93    0.41 
 -15   5  -1    1.42    0.53 
  15   5   1    1.69    0.50 
 -16  -5  -1    0.11    0.35 
 -16  -5  -1    0.04    0.34 
  16  -5   1    0.31    0.33 
  16  -5   1   -0.05    0.47 
  16  -5   1   -0.59    0.49 
 -16  -5  -1    0.20    0.37 
  16   5   1    0.15    0.61 
 -16   5  -1    0.42    0.40 
  16   5   1    0.37    0.36 
  16   5   1    0.53    0.29 
 -16   5  -1    0.11    0.33 
  16   5   1   -0.49    0.37 
 -17  -5  -1    0.67    0.46 
  17  -5   1    2.05    0.79 
 -17  -5  -1    0.76    0.48 
  17  -5   1    2.03    0.77 
 -17  -5  -1    2.19    0.56 
  17  -5   1    0.89    0.46 
 -17   5  -1    0.34    0.43 
  17   5   1    1.37    0.51 
 -17   5  -1    0.99    0.46 
  17   5   1    1.18    0.50 
  17   5   1    2.01    0.82 
  18  -5   1    0.00    0.57 
  18  -5   1    0.65    0.48 
 -18  -5  -1    0.49    0.44 
  18  -5   1    0.38    0.63 
 -18  -5  -1    0.83    0.47 
  18   5   1    0.89    0.69 
 -18   5  -1    1.52    0.53 
  18   5   1    0.83    0.49 
 -18   5  -1   -0.12    0.37 
  19  -5   1    8.71    1.43 
 -19  -5  -1    9.79    1.43 
  19  -5   1    6.40    1.49 
 -19  -5  -1    5.30    1.20 
  19  -5   1    8.22    1.60 
 -19   5  -1   10.55    1.45 
  19   5   1    9.16    1.37 
 -19   5  -1    8.14    1.28 
  19   5   1    9.06    1.71 
  20  -5   1    1.66    0.84 
  20  -5   1    0.77    0.66 
 -20  -5  -1    1.30    0.62 
  20  -5   1    0.95    0.58 
 -20  -5  -1    1.59    0.65 
  20   5   1    1.44    0.88 
 -20   5  -1    1.76    0.61 
  20   5   1    2.16    0.69 
 -20   5  -1    2.04    0.63 
 -21  -5  -1    1.63    0.66 
 -21  -5  -1    1.52    0.65 
  21  -5   1    2.29    0.91 
  21  -5   1    2.70    0.79 
  21  -5   1    2.15    1.03 
 -21   5  -1    1.73    0.62 
  21   5   1    2.22    0.95 
 -21   5  -1    2.70    0.72 
  21   5   1    2.04    0.73 
  22  -5   1    0.07    0.70 
 -22  -5  -1    0.00    0.47 
  22  -5   1    0.11    0.46 
  22  -5   1   -0.15    0.81 
 -22  -5  -1   -0.10    0.47 
 -22   5  -1   -0.13    0.45 
  22   5   1   -0.71    0.41 
 -22   5  -1    0.09    0.50 
  22   5   1   -0.65    0.81 
  23  -5   1    1.05    1.03 
 -23  -5  -1    0.12    0.53 
  23  -5   1   -0.05    0.53 
  23  -5   1   -0.34    0.67 
  23   5   1    1.16    0.62 
  23   5   1    0.59    1.01 
 -23   5  -1    0.15    0.48 
  22  -6  -1    0.53    1.01 
  22  -6  -1    1.62    0.72 
  22  -6  -1    2.09    1.05 
 -22  -6   1    1.40    0.66 
 -22  -6   1    0.84    0.63 
 -22   6   1    1.89    0.70 
  22   6  -1    1.93    1.09 
 -22   6   1    3.32    0.78 
  22   6  -1    1.45    0.70 
  21  -6  -1    2.63    0.87 
  21  -6  -1    1.72    0.90 
 -21  -6   1    1.28    0.64 
  21  -6  -1    1.13    0.84 
 -21  -6   1    2.08    0.71 
 -21   6   1    1.71    0.63 
  21   6  -1    1.70    0.74 
 -21   6   1    1.14    0.68 
  21   6  -1    2.94    1.12 
 -20  -6   1   -0.43    0.42 
  20  -6  -1    0.52    0.52 
  20  -6  -1    0.76    0.82 
 -20  -6   1   -0.37    0.38 
  20  -6  -1   -0.18    0.63 
  20   6  -1   -0.04    0.76 
 -20   6   1   -0.23    0.43 
  20   6  -1    0.19    0.47 
 -20   6   1    0.27    0.39 
  19  -6  -1    0.18    0.48 
 -19  -6   1    0.26    0.43 
  19  -6  -1   -0.30    0.57 
 -19  -6   1    0.93    0.51 
 -19  -6   1   -0.02    0.47 
  19  -6  -1    0.31    0.61 
  19   6  -1    0.30    0.69 
  19   6  -1    0.73    0.55 
 -19   6   1    0.61    0.52 
 -19   6   1    0.17    0.43 
 -18  -6   1    3.37    0.81 
  18  -6  -1    2.73    1.04 
  18  -6  -1    4.42    0.95 
 -18  -6   1    3.95    0.88 
  18  -6  -1    5.31    1.16 
 -18  -6   1    3.44    0.82 
 -18   6   1    2.73    0.76 
 -18   6   1    4.02    0.85 
  18   6  -1    3.29    1.04 
  18   6  -1    3.06    0.85 
  17  -6  -1    0.96    0.72 
 -17  -6   1    1.08    0.55 
  17  -6  -1    1.16    0.54 
 -17  -6   1    0.83    0.59 
  17  -6  -1    0.83    0.66 
 -17  -6   1    1.32    0.53 
 -17   6   1    0.65    0.44 
  17   6  -1    1.77    0.81 
 -17   6   1    0.84    0.48 
  17   6  -1    0.81    0.53 
  17   6  -1    1.23    0.41 
 -16  -6   1    6.08    1.18 
 -16  -6   1    6.48    1.18 
  16  -6  -1    6.09    1.24 
  16  -6  -1    5.68    1.28 
  16  -6  -1    6.94    1.43 
 -16  -6   1    9.20    1.25 
 -16   6   1    8.16    1.24 
  16   6  -1    9.48    1.30 
 -16   6   1    6.95    1.18 
  16   6  -1    6.91    1.37 
  16   6  -1    8.08    1.08 
 -15  -6   1   -0.08    0.33 
 -15  -6   1   -0.04    0.30 
  15  -6  -1   -0.02    0.48 
 -15  -6   1   -0.09    0.32 
  15  -6  -1    0.10    0.38 
  15  -6  -1    0.53    0.55 
  15   6  -1    0.12    0.53 
  15   6  -1    0.91    0.46 
 -15   6   1   -0.02    0.31 
 -15   6   1   -0.39    0.30 
  15   6  -1    0.17    0.34 
  15   6  -1    0.42    0.27 
 -14  -6   1   15.63    1.78 
 -14  -6   1   12.94    1.84 
 -14  -6   1   10.10    1.69 
  14  -6  -1   13.10    1.87 
  14  -6  -1   14.51    2.02 
  14  -6  -1   13.29    1.85 
  14   6  -1   12.32    1.62 
 -14   6   1    9.70    1.69 
  14   6  -1   14.12    1.75 
  14   6  -1   15.69    1.57 
 -14   6   1   12.42    1.71 
  14   6  -1   12.87    1.85 
  13  -6  -1    1.32    0.50 
 -13  -6   1    0.94    0.40 
 -13  -6   1    1.37    0.44 
 -13  -6   1    1.93    0.60 
  13  -6  -1    0.64    0.53 
  13  -6  -1    0.14    0.44 
  13   6  -1    0.96    0.42 
  13   6  -1    0.37    0.50 
 -13   6   1    1.29    0.49 
  13   6  -1    0.29    0.41 
  13   6  -1    0.81    0.39 
 -13   6   1    1.44    0.49 
 -12  -6   1   -0.06    0.29 
 -12  -6   1    0.29    0.43 
 -12  -6   1    0.36    0.31 
 -12  -6   1    0.28    0.32 
 -12  -6   1    0.13    0.22 
  12  -6  -1    0.43    0.32 
  12  -6  -1    0.22    0.36 
  12  -6  -1   -0.57    0.35 
 -12   6   1   -0.17    0.20 
  12   6  -1   -0.29    0.24 
  12   6  -1   -0.07    0.34 
  12   6  -1    0.09    0.28 
 -12   6   1    0.25    0.37 
  12   6  -1   -0.24    0.34 
 -11  -6   1    2.16    0.56 
  11  -6  -1    2.11    0.59 
 -11  -6   1    3.02    0.70 
  11  -6  -1    2.21    0.60 
  11  -6  -1    2.56    0.71 
 -11  -6   1    2.17    0.45 
 -11  -6   1    1.88    0.50 
 -11  -6   1    2.16    0.54 
  11   6  -1    1.06    0.57 
  11   6  -1    1.43    0.55 
 -11   6   1    1.61    0.51 
  11   6  -1    1.88    0.49 
 -11   6   1    1.74    0.49 
  11   6  -1    2.04    0.41 
  11   6  -1    1.03    0.43 
 -10  -6   1    0.59    0.35 
  10  -6  -1    0.54    0.44 
  10  -6  -1    0.27    0.38 
 -10  -6   1    0.76    0.42 
 -10  -6   1    1.09    0.37 
 -10  -6   1    0.45    0.29 
  10  -6  -1    0.92    0.46 
 -10  -6   1    1.12    0.38 
  10   6  -1    0.42    0.27 
  10   6  -1    0.84    0.37 
 -10   6   1    0.40    0.22 
  10   6  -1    1.49    0.45 
 -10   6   1    0.73    0.36 
 -10   6   1    0.81    0.42 
  10   6  -1    0.75    0.35 
  10   6  -1    0.54    0.41 
   9  -6  -1    5.89    1.10 
  -9  -6   1    6.25    1.08 
   9  -6  -1    9.32    1.29 
   9  -6  -1    6.49    1.01 
   9  -6  -1    8.96    0.98 
  -9  -6   1    8.26    1.14 
   9  -6  -1    6.41    0.72 
  -9  -6   1    7.98    1.21 
  -9  -6   1    4.95    1.02 
  -9  -6   1    6.60    0.94 
  -9   6   1    7.65    1.07 
   9   6  -1    7.49    1.09 
   9   6  -1    6.94    0.98 
   9   6  -1    8.13    1.03 
   9   6  -1    7.11    1.03 
  -9   6   1    6.46    1.04 
  -9   6   1    9.59    0.88 
   9   6  -1    7.09    0.87 
   8  -6  -1    6.30    0.82 
   8  -6  -1    7.71    0.89 
   8  -6  -1    5.35    0.63 
   8  -6  -1    7.23    1.09 
  -8  -6   1    3.35    0.81 
  -8  -6   1    6.06    0.92 
  -8  -6   1    5.22    0.77 
  -8  -6   1    5.91    0.99 
   8  -6  -1    4.54    0.90 
  -8  -6   1    5.11    0.86 
  -8   6   1    4.04    0.78 
   8   6  -1    5.40    0.86 
  -8   6   1    3.98    0.84 
   8   6  -1    5.54    0.82 
   8   6  -1    5.18    0.84 
  -8   6   1    5.68    0.72 
   8   6  -1    5.00    0.77 
   8   6  -1    5.19    0.70 
   7  -6  -1    0.04    0.19 
   7  -6  -1   -0.15    0.24 
   7  -6  -1    0.18    0.17 
  -7  -6   1    0.17    0.24 
  -7  -6   1    0.21    0.30 
  -7  -6   1   -0.17    0.27 
  -7  -6   1    0.17    0.27 
   7  -6  -1   -0.16    0.23 
   7  -6  -1    0.27    0.38 
   7  -6  -1    0.40    0.11 
  -7   6   1    0.45    0.24 
   7   6  -1   -0.12    0.21 
  -7   6   1    0.17    0.26 
   7   6  -1    0.43    0.30 
   7   6  -1    0.33    0.27 
  -7   6   1    0.11    0.18 
   7   6  -1    0.14    0.26 
   7   6  -1    0.38    0.24 
  -7   6   1    0.53    0.37 
  -6  -6   1    0.07    0.28 
   6  -6  -1    0.12    0.30 
  -6  -6   1   -0.14    0.30 
  -6  -6   1    0.05    0.23 
   6  -6  -1    0.16    0.21 
   6  -6  -1   -0.05    0.17 
  -6  -6   1    0.42    0.27 
   6  -6  -1    0.11    0.20 
   6  -6  -1    0.21    0.31 
   6  -6  -1    0.12    0.17 
   6   6  -1   -0.01    0.18 
   6   6  -1    0.11    0.23 
   6   6  -1   -0.04    0.26 
   6   6  -1    0.06    0.24 
  -6   6   1    0.15    0.25 
  -6   6   1    0.14    0.19 
   6   6  -1    0.57    0.27 
  -6   6   1    0.57    0.39 
  -5  -6   1    4.68    0.74 
   5  -6  -1    4.29    0.76 
  -5  -6   1    4.27    0.69 
  -5  -6   1    3.89    0.57 
   5  -6  -1    4.20    0.64 
  -5  -6   1    2.73    0.67 
   5  -6  -1    3.52    0.53 
   5  -6  -1    3.47    0.50 
   5  -6  -1    4.57    0.73 
  -5  -6   1    3.14    0.72 
   5  -6  -1    5.31    0.85 
   5  -6  -1    3.03    0.59 
   5   6  -1    4.38    0.58 
  -5   6   1    3.40    0.58 
   5   6  -1    3.47    0.61 
  -5   6   1    4.38    0.68 
  -5   6   1    4.27    0.75 
   5   6  -1    5.84    0.71 
   5   6  -1    3.28    0.62 
   5   6  -1    5.17    0.61 
   4  -6  -1   39.67    4.23 
   4  -6  -1   46.56    4.22 
  -4  -6   1   31.47    4.46 
  -4  -6   1   32.94    4.22 
   4  -6  -1   39.26    3.76 
  -4  -6   1   32.31    4.01 
   4  -6  -1   42.57    4.28 
  -4  -6   1   38.32    4.34 
   4  -6  -1   37.66    4.26 
   4  -6  -1   38.50    4.33 
  -4  -6   1   47.97    4.34 
  -4   6   1   41.78    4.12 
   4   6  -1   41.02    3.84 
  -4   6   1   37.39    4.23 
   4   6  -1   37.12    3.92 
   4   6  -1   40.41    3.81 
   4   6  -1   39.14    3.69 
  -4   6   1   40.62    3.96 
   4   6  -1   43.47    4.01 
   3  -6  -1   14.52    1.87 
   3  -6  -1   12.05    1.90 
   3  -6  -1   13.98    1.84 
  -3  -6   1   17.64    1.93 
   3  -6  -1   15.90    1.90 
  -3  -6   1   21.70    2.02 
   3  -6  -1   19.65    2.03 
   3  -6  -1   16.98    1.89 
  -3  -6   1   15.19    1.77 
   3  -6  -1   15.47    1.66 
  -3  -6   1   15.63    1.94 
  -3  -6   1   17.27    1.99 
  -3  -6   1   16.76    1.93 
   3   6  -1   15.57    1.68 
   3   6  -1   18.23    1.79 
   3   6  -1   16.39    1.69 
  -3   6   1   16.29    1.74 
   3   6  -1   14.62    1.62 
  -3   6   1   17.85    1.88 
  -3   6   1   17.55    1.88 
  -2  -6   1   25.72    3.39 
   2  -6  -1   28.60    3.27 
  -2  -6   1   26.45    3.41 
   2  -6  -1   28.48    3.37 
   2  -6  -1   35.23    3.55 
   2  -6  -1   26.54    3.43 
  -2  -6   1   36.31    3.26 
  -2  -6   1   31.60    3.40 
   2  -6  -1   28.30    3.00 
   2  -6  -1   28.13    3.39 
  -2  -6   1   38.73    3.54 
   2  -6  -1   28.24    3.36 
   2   6  -1   28.01    2.92 
  -2   6   1   35.45    3.38 
   2   6  -1   29.94    3.00 
  -2   6   1   34.27    3.30 
   2   6  -1   28.71    3.16 
   2   6  -1   32.04    3.02 
  -2   6   1   32.87    3.16 
  -1  -6   1    0.53    0.34 
   1  -6  -1    0.58    0.25 
   1  -6  -1    0.71    0.36 
  -1  -6   1    0.86    0.28 
  -1  -6   1    0.54    0.25 
   1  -6  -1    0.30    0.22 
  -1  -6   1    0.34    0.27 
  -1  -6   1    0.40    0.26 
   1  -6  -1    0.60    0.32 
   1  -6  -1    0.71    0.32 
  -1  -6   1    0.22    0.25 
  -1  -6   1   -0.01    0.20 
   1  -6  -1    0.47    0.24 
   1  -6  -1   -0.09    0.20 
   1   6  -1    0.78    0.25 
  -1   6   1    0.47    0.22 
  -1   6   1    0.20    0.27 
  -1   6   1    0.35    0.20 
   1   6  -1    0.67    0.25 
   1   6  -1    0.46    0.27 
   1   6  -1    0.35    0.21 
   1   6  -1    1.04    0.28 
  -1   6   1    0.48    0.18 
   0  -6   1    1.04    0.34 
   0  -6  -1    0.91    0.31 
   0  -6   1    0.62    0.32 
   0  -6   1    1.12    0.35 
   0  -6  -1    1.14    0.40 
   0  -6  -1    1.00    0.33 
   0  -6  -1    0.87    0.41 
   0  -6   1    1.36    0.34 
   0  -6   1    1.01    0.30 
   0  -6   1    1.13    0.42 
   0  -6   1    2.26    0.47 
   0  -6  -1    1.30    0.38 
   0  -6  -1    1.32    0.34 
   0  -6  -1    1.11    0.30 
   0   6  -1    1.37    0.33 
   0   6  -1    0.48    0.22 
   0   6   1    0.99    0.31 
   0   6   1    1.22    0.26 
   0   6  -1    1.18    0.26 
   0   6  -1    1.09    0.32 
   0   6   1    1.13    0.31 
   0   6  -1    0.90    0.40 
   0   6  -1    0.91    0.27 
   0   6   1    0.87    0.38 
   1  -6   1    1.10    0.38 
  -1  -6  -1    1.36    0.36 
  -1  -6  -1    0.75    0.37 
   1  -6   1    1.14    0.32 
   1  -6   1    1.25    0.39 
   1  -6   1    1.80    0.49 
  -1  -6  -1    0.65    0.29 
  -1  -6  -1    1.16    0.42 
   1  -6   1    1.29    0.31 
  -1  -6  -1    1.37    0.32 
   1  -6   1    1.29    0.35 
   1  -6   1    0.51    0.31 
  -1  -6  -1    1.12    0.38 
  -1   6  -1    1.59    0.35 
   1   6   1    1.50    0.44 
  -1   6  -1    1.32    0.28 
   1   6   1    0.60    0.27 
  -1   6  -1    0.94    0.27 
  -1   6  -1    1.44    0.45 
  -1   6  -1    1.18    0.24 
   1   6   1    1.15    0.27 
  -1   6  -1    1.07    0.32 
   1   6   1    1.44    0.33 
  -2  -6  -1    4.56    0.84 
   2  -6   1    5.39    0.82 
   2  -6   1    5.29    0.82 
   2  -6   1    5.61    0.92 
   2  -6   1    4.74    0.68 
   2  -6   1    5.27    0.81 
  -2  -6  -1    5.45    0.72 
  -2  -6  -1    3.98    0.84 
  -2  -6  -1    5.35    0.79 
  -2  -6  -1    5.87    0.81 
   2  -6   1    4.46    0.75 
   2  -6   1    5.38    0.79 
   2   6   1    4.05    0.70 
   2   6   1    5.91    0.70 
  -2   6  -1    4.55    0.59 
  -2   6  -1    4.84    0.74 
  -2   6  -1    6.06    0.77 
  -2   6  -1    6.68    0.95 
   2   6   1    5.75    0.74 
   2   6   1    4.97    0.68 
  -2   6  -1    5.36    0.67 
   3  -6   1    0.33    0.20 
   3  -6   1   -0.07    0.22 
  -3  -6  -1   -0.18    0.23 
  -3  -6  -1    0.14    0.28 
  -3  -6  -1   -0.01    0.16 
   3  -6   1   -0.17    0.20 
  -3  -6  -1   -0.31    0.12 
  -3  -6  -1   -0.10    0.21 
   3  -6   1   -0.20    0.17 
   3  -6   1    0.00    0.20 
   3  -6   1   -0.07    0.21 
   3  -6   1   -0.10    0.24 
  -3   6  -1    0.37    0.21 
  -3   6  -1    0.13    0.17 
  -3   6  -1    0.17    0.12 
   3   6   1   -0.12    0.17 
  -3   6  -1    0.06    0.19 
  -3   6  -1   -0.09    0.31 
   3   6   1    0.19    0.22 
   3   6   1    0.21    0.20 
   3   6   1    0.39    0.23 
  -4  -6  -1   28.41    3.64 
   4  -6   1   29.10    3.05 
   4  -6   1   36.44    3.48 
  -4  -6  -1   25.04    3.50 
   4  -6   1   27.44    3.63 
  -4  -6  -1   40.16    3.59 
   4  -6   1   31.11    3.55 
   4  -6   1   28.77    3.41 
  -4  -6  -1   31.38    3.26 
   4  -6   1   28.55    3.47 
  -4   6  -1   31.74    2.99 
  -4   6  -1   36.94    3.49 
   4   6   1   36.31    3.43 
  -4   6  -1   29.97    3.38 
   4   6   1   30.97    3.10 
  -4   6  -1   32.74    3.24 
   4   6   1   32.17    3.26 
   4   6   1   31.55    3.12 
   5  -6   1    6.46    0.83 
   5  -6   1    4.47    0.76 
   5  -6   1    5.24    0.66 
  -5  -6  -1    5.40    0.82 
   5  -6   1    4.33    0.56 
  -5  -6  -1    5.19    0.91 
  -5  -6  -1    5.51    0.86 
   5  -6   1    4.71    0.87 
  -5  -6  -1    4.93    0.89 
  -5  -6  -1    5.40    0.64 
   5  -6   1    4.50    0.89 
   5  -6   1    6.27    0.63 
  -5   6  -1    4.81    0.64 
   5   6   1    5.77    0.77 
   5   6   1    3.52    0.67 
   5   6   1    5.32    0.66 
  -5   6  -1    4.22    0.84 
  -5   6  -1    6.48    0.77 
   5   6   1    4.16    0.70 
   5   6   1    5.63    0.75 
  -5   6  -1    5.47    0.80 
  -6  -6  -1    0.21    0.29 
   6  -6   1    0.12    0.17 
  -6  -6  -1    0.09    0.22 
   6  -6   1   -0.02    0.34 
   6  -6   1   -0.04    0.20 
   6  -6   1   -0.13    0.25 
  -6  -6  -1    0.26    0.31 
   6  -6   1   -0.09    0.15 
  -6  -6  -1   -0.12    0.22 
  -6   6  -1   -0.16    0.17 
   6   6   1    0.13    0.19 
  -6   6  -1   -0.01    0.18 
  -6   6  -1   -0.05    0.18 
   6   6   1    0.06    0.19 
   6   6   1   -0.26    0.18 
  -6   6  -1   -0.04    0.17 
  -6   6  -1    0.27    0.34 
   6   6   1    0.11    0.21 
   6   6   1   -0.42    0.19 
  -7  -6  -1    5.82    0.90 
  -7  -6  -1    4.32    0.93 
   7  -6   1    5.52    0.98 
  -7  -6  -1    5.93    0.93 
  -7  -6  -1    4.66    0.90 
   7  -6   1    6.49    0.66 
  -7  -6  -1    7.26    0.87 
   7  -6   1    4.20    0.79 
   7  -6   1    5.33    1.02 
   7  -6   1    5.37    0.78 
  -7   6  -1    6.78    1.04 
   7   6   1    5.63    0.81 
  -7   6  -1    6.57    0.79 
   7   6   1    5.12    0.81 
  -7   6  -1    5.48    0.86 
   7   6   1    6.96    0.84 
  -7   6  -1    5.64    0.88 
   7   6   1    5.29    0.80 
   7   6   1    4.70    0.78 
  -8  -6  -1   16.66    1.87 
  -8  -6  -1   15.51    1.80 
  -8  -6  -1   17.94    1.68 
   8  -6   1   15.03    1.63 
   8  -6   1   12.40    1.40 
   8  -6   1   13.76    1.91 
  -8  -6  -1   10.59    1.76 
   8  -6   1   17.05    1.87 
  -8  -6  -1   11.83    1.73 
   8   6   1   15.99    1.68 
   8   6   1   14.60    1.65 
   8   6   1   14.18    1.57 
   8   6   1   17.13    1.65 
   8   6   1   14.25    1.61 
  -8   6  -1   15.85    1.56 
  -8   6  -1   13.11    1.76 
  -8   6  -1   15.42    1.76 
  -8   6  -1   13.03    1.71 
  -9  -6  -1   -0.27    0.19 
  -9  -6  -1   -0.01    0.23 
   9  -6   1   -0.13    0.20 
   9  -6   1    0.38    0.46 
  -9  -6  -1   -0.32    0.28 
   9  -6   1    0.18    0.27 
  -9  -6  -1    0.44    0.34 
  -9  -6  -1   -0.14    0.25 
  -9   6  -1    0.10    0.33 
  -9   6  -1    0.58    0.29 
  -9   6  -1    0.01    0.21 
   9   6   1    0.18    0.23 
   9   6   1    0.14    0.25 
  -9   6  -1   -0.14    0.14 
   9   6   1   -0.03    0.26 
   9   6   1    0.61    0.36 
   9   6   1    0.20    0.23 
 -10  -6  -1   -0.14    0.26 
 -10  -6  -1   -0.18    0.27 
 -10  -6  -1    0.05    0.37 
 -10  -6  -1    0.22    0.29 
 -10  -6  -1    0.30    0.31 
  10  -6   1    0.04    0.28 
  10  -6   1    0.21    0.33 
  10  -6   1    0.71    0.47 
 -10   6  -1    0.29    0.36 
 -10   6  -1    0.05    0.18 
  10   6   1   -0.14    0.22 
  10   6   1    0.21    0.28 
  10   6   1    0.32    0.33 
  10   6   1    0.25    0.37 
 -10   6  -1   -0.22    0.28 
 -11  -6  -1    0.27    0.31 
  11  -6   1    0.24    0.35 
  11  -6   1    1.30    0.56 
  11  -6   1    0.67    0.39 
 -11  -6  -1    1.69    0.45 
 -11  -6  -1    0.29    0.43 
 -11  -6  -1    1.03    0.44 
 -11  -6  -1    0.92    0.42 
  11   6   1    0.23    0.31 
 -11   6  -1    0.40    0.34 
 -11   6  -1   -0.10    0.34 
  11   6   1    0.96    0.40 
  11   6   1    0.70    0.47 
  11   6   1    0.40    0.34 
  12  -6   1    1.52    0.64 
  12  -6   1    1.70    0.55 
 -12  -6  -1    0.56    0.36 
 -12  -6  -1   -0.05    0.28 
  12  -6   1    1.05    0.46 
 -12  -6  -1    1.45    0.46 
 -12  -6  -1    2.51    0.54 
 -12  -6  -1    1.70    0.61 
  12   6   1    0.81    0.41 
  12   6   1    0.95    0.36 
 -12   6  -1    0.61    0.35 
  12   6   1    1.23    0.41 
  12   6   1    1.16    0.53 
 -12   6  -1    1.51    0.52 
  13  -6   1    2.93    0.81 
 -13  -6  -1    3.73    0.68 
 -13  -6  -1    2.41    0.72 
  13  -6   1    2.35    0.66 
  13  -6   1    2.19    0.66 
 -13  -6  -1    2.19    0.57 
 -13  -6  -1    1.55    0.52 
 -13   6  -1    2.17    0.58 
  13   6   1    1.99    0.47 
  13   6   1    2.59    0.73 
 -13   6  -1    2.89    0.68 
  13   6   1    1.94    0.53 
  13   6   1    1.91    0.57 
  14  -6   1    3.63    1.02 
 -14  -6  -1    5.26    0.90 
  14  -6   1    4.77    0.98 
  14  -6   1    6.40    1.04 
 -14  -6  -1    4.59    0.98 
 -14  -6  -1    4.79    0.88 
  14   6   1    4.35    1.01 
  14   6   1    3.76    0.82 
 -14   6  -1    5.35    0.95 
 -14   6  -1    3.86    0.84 
  14   6   1    4.50    0.83 
  14   6   1    5.50    0.81 
 -15  -6  -1   -0.03    0.31 
 -15  -6  -1   -0.01    0.32 
  15  -6   1    0.03    0.37 
 -15  -6  -1    0.20    0.41 
  15  -6   1   -0.11    0.42 
  15  -6   1   -0.15    0.46 
 -15   6  -1    0.32    0.39 
 -15   6  -1    1.03    0.52 
  15   6   1    0.11    0.37 
  15   6   1    1.18    0.50 
  15   6   1   -0.34    0.46 
  15   6   1    0.40    0.29 
  16  -6   1   14.12    1.93 
 -16  -6  -1   13.52    1.89 
  16  -6   1   10.95    1.97 
 -16  -6  -1   13.38    1.87 
 -16  -6  -1   14.66    1.72 
  16  -6   1   13.45    1.95 
  16   6   1   11.99    1.69 
 -16   6  -1   11.39    1.76 
  16   6   1    9.83    1.82 
 -16   6  -1   13.18    1.77 
  16   6   1   13.12    1.50 
 -17  -6  -1    0.86    0.49 
 -17  -6  -1    1.04    0.58 
  17  -6   1    1.02    0.69 
  17  -6   1    1.16    0.65 
 -17  -6  -1    1.30    0.56 
  17  -6   1    1.06    0.52 
  17   6   1    1.14    0.74 
 -17   6  -1    1.65    0.58 
  17   6   1    0.64    0.46 
 -17   6  -1    1.88    0.59 
  17   6   1    0.86    0.38 
  18  -6   1    3.30    1.02 
  18  -6   1    3.34    0.91 
 -18  -6  -1    5.04    0.99 
 -18  -6  -1    5.33    0.93 
  18  -6   1    3.18    1.01 
 -18  -6  -1    4.19    0.94 
  18   6   1    3.62    1.02 
 -18   6  -1    4.23    0.90 
  18   6   1    3.18    0.85 
 -18   6  -1    5.00    0.94 
 -19  -6  -1    1.80    0.65 
 -19  -6  -1    0.83    0.63 
  19  -6   1   -0.56    0.67 
  19  -6   1    1.56    0.81 
  19  -6   1    1.22    0.60 
 -19   6  -1    1.36    0.58 
 -19   6  -1    1.41    0.62 
  19   6   1    0.97    0.81 
  19   6   1    1.78    0.67 
  20  -6   1    2.61    0.88 
 -20  -6  -1    4.65    0.95 
  20  -6   1    3.02    1.06 
  20  -6   1    4.97    1.27 
 -20  -6  -1    3.72    0.92 
  20   6   1    4.36    0.97 
 -20   6  -1    3.97    0.95 
 -20   6  -1    4.57    0.94 
  20   6   1    3.26    1.17 
  21  -6   1    3.47    1.09 
  21  -6   1    3.11    0.90 
 -21  -6  -1    2.90    0.86 
 -21  -6  -1    2.75    0.76 
  21  -6   1    5.74    1.33 
  21   6   1    2.19    0.99 
 -21   6  -1    2.54    0.77 
  21   6   1    2.95    0.83 
 -21   6  -1    3.11    0.80 
  22  -6   1    2.48    1.05 
  22   6   1    2.87    1.18 
 -20  -7   1    0.76    0.59 
 -20  -7   1    1.36    0.63 
 -20  -7   1    0.59    0.55 
  20  -7  -1    1.64    0.82 
  20  -7  -1    2.27    1.08 
 -20   7   1    1.09    0.60 
  20   7  -1    0.23    0.55 
 -20   7   1    1.53    0.58 
  19  -7  -1    1.99    0.83 
 -19  -7   1    2.60    0.75 
 -19  -7   1    2.74    0.75 
  19  -7  -1    1.23    0.85 
 -19  -7   1    3.57    0.94 
  19   7  -1    1.92    0.75 
 -19   7   1    1.78    0.60 
 -19   7   1    1.82    0.69 
 -18  -7   1    0.54    0.46 
  18  -7  -1    0.04    0.66 
 -18  -7   1    0.09    0.47 
  18  -7  -1    0.27    0.54 
 -18  -7   1    0.97    0.54 
 -18   7   1   -0.06    0.42 
  18   7  -1    0.68    0.39 
 -18   7   1    0.81    0.52 
  18   7  -1   -0.14    0.41 
  17  -7  -1    1.26    0.88 
 -17  -7   1    0.09    0.45 
  17  -7  -1    1.30    0.64 
 -17  -7   1    0.63    0.49 
 -17  -7   1    0.94    0.50 
 -17   7   1    0.54    0.49 
  17   7  -1   -0.29    0.45 
 -17   7   1    1.22    0.53 
  17   7  -1    1.18    0.42 
  16  -7  -1    0.28    0.47 
 -16  -7   1    0.63    0.50 
 -16  -7   1    0.50    0.46 
  16  -7  -1    0.22    0.59 
 -16  -7   1    0.40    0.45 
  16   7  -1    0.19    0.33 
  16   7  -1    0.51    0.45 
 -16   7   1    1.05    0.54 
 -16   7   1    0.00    0.37 
 -15  -7   1    3.49    0.88 
 -15  -7   1    3.67    0.79 
  15  -7  -1    4.73    1.01 
 -15  -7   1    4.14    0.86 
  15  -7  -1    3.50    1.01 
 -15   7   1    3.47    0.78 
  15   7  -1    5.15    0.95 
  15   7  -1    3.18    0.70 
 -15   7   1    3.62    0.83 
  14  -7  -1    4.46    1.00 
 -14  -7   1    5.30    1.05 
 -14  -7   1    4.95    0.94 
 -14  -7   1    4.62    0.91 
  14  -7  -1    4.92    1.13 
  14   7  -1    4.92    0.92 
 -14   7   1    3.08    0.79 
  14   7  -1    6.62    0.89 
 -14   7   1    4.75    0.92 
  13  -7  -1   17.61    2.45 
 -13  -7   1   20.31    2.28 
  13  -7  -1   17.53    2.40 
 -13  -7   1   18.22    2.17 
 -13  -7   1   16.92    2.38 
 -13   7   1   16.81    2.09 
 -13   7   1   15.96    2.11 
  13   7  -1   16.17    2.10 
  13   7  -1   16.62    1.96 
  12  -7  -1    0.50    0.43 
 -12  -7   1    0.68    0.39 
 -12  -7   1    0.62    0.42 
  12  -7  -1    0.68    0.55 
 -12  -7   1   -0.43    0.39 
  12   7  -1    0.18    0.34 
  12   7  -1   -0.08    0.32 
 -12   7   1    0.46    0.37 
  12   7  -1   -0.36    0.34 
 -12   7   1    0.44    0.44 
 -11  -7   1    1.31    0.52 
 -11  -7   1    2.17    0.67 
  11  -7  -1    1.86    0.68 
 -11  -7   1    1.34    0.47 
  11  -7  -1    3.58    0.86 
 -11  -7   1    2.40    0.59 
 -11  -7   1    2.49    0.65 
  11   7  -1    3.45    0.63 
 -11   7   1    2.94    0.64 
 -11   7   1    1.48    0.60 
  11   7  -1    2.53    0.64 
 -11   7   1    2.48    0.44 
  11   7  -1    2.62    0.57 
 -10  -7   1    2.31    0.49 
 -10  -7   1    0.59    0.48 
 -10  -7   1    1.68    0.53 
 -10  -7   1    1.75    0.52 
  10  -7  -1    1.88    0.60 
  10  -7  -1    2.29    0.76 
 -10  -7   1    1.71    0.56 
 -10   7   1    2.63    0.64 
  10   7  -1    1.63    0.53 
 -10   7   1    2.35    0.57 
  10   7  -1    2.97    0.62 
  10   7  -1    1.18    0.45 
 -10   7   1    2.09    0.41 
  -9  -7   1    1.96    0.55 
  -9  -7   1    1.02    0.41 
  -9  -7   1    0.83    0.47 
  -9  -7   1    1.45    0.52 
   9  -7  -1    1.90    0.62 
   9  -7  -1    2.35    0.69 
  -9  -7   1    2.24    0.55 
   9  -7  -1    2.20    0.45 
  -9   7   1    0.87    0.46 
   9   7  -1    1.41    0.45 
   9   7  -1    1.36    0.37 
  -9   7   1    2.37    0.53 
  -9   7   1    1.35    0.36 
   9   7  -1    1.78    0.53 
   9   7  -1    1.56    0.46 
  -8  -7   1    1.69    0.47 
   8  -7  -1    1.20    0.49 
   8  -7  -1    0.02    0.39 
  -8  -7   1    0.59    0.44 
  -8  -7   1    0.83    0.41 
  -8  -7   1    1.46    0.51 
  -8  -7   1    1.60    0.39 
   8  -7  -1    1.89    0.40 
   8   7  -1    1.07    0.33 
  -8   7   1    0.74    0.36 
  -8   7   1    0.62    0.41 
   8   7  -1    0.72    0.37 
   8   7  -1    0.82    0.37 
   8   7  -1    1.07    0.33 
   8   7  -1    0.41    0.34 
  -8   7   1    0.93    0.29 
  -7  -7   1   10.32    1.20 
  -7  -7   1    8.01    1.30 
   7  -7  -1    5.67    1.07 
   7  -7  -1    5.82    1.14 
   7  -7  -1    9.41    1.36 
  -7  -7   1    6.85    1.18 
   7  -7  -1    7.30    1.28 
  -7  -7   1    9.71    1.40 
   7   7  -1   10.57    1.06 
   7   7  -1    8.32    1.09 
   7   7  -1    7.75    0.98 
  -7   7   1    9.62    1.23 
  -7   7   1    8.09    1.04 
   7   7  -1    8.46    1.13 
  -7   7   1    8.19    1.24 
   7   7  -1    7.87    1.12 
  -6  -7   1   12.05    1.55 
  -6  -7   1   11.38    1.34 
   6  -7  -1    7.24    1.24 
  -6  -7   1    9.59    1.35 
   6  -7  -1    9.54    1.06 
   6  -7  -1    8.89    1.43 
  -6  -7   1    8.67    1.40 
   6  -7  -1    9.78    1.43 
   6  -7  -1    7.87    1.31 
  -6   7   1    8.97    1.33 
   6   7  -1   10.64    1.29 
  -6   7   1    9.96    1.24 
   6   7  -1    9.35    1.23 
  -6   7   1   10.05    1.13 
   6   7  -1    8.68    1.10 
   6   7  -1    9.16    1.19 
   6   7  -1   10.84    1.17 
   5  -7  -1   19.21    2.22 
  -5  -7   1   23.56    2.38 
   5  -7  -1   18.85    2.31 
  -5  -7   1   19.38    2.31 
   5  -7  -1   16.20    2.16 
   5  -7  -1   22.59    2.27 
   5  -7  -1   17.60    2.24 
  -5  -7   1   20.24    2.05 
  -5  -7   1   14.26    2.29 
   5  -7  -1   18.12    1.92 
  -5   7   1   22.49    2.22 
  -5   7   1   19.91    2.19 
  -5   7   1   21.10    2.05 
   5   7  -1   15.60    2.09 
   5   7  -1   17.09    1.96 
   5   7  -1   18.37    1.98 
   5   7  -1   18.78    1.89 
   5   7  -1   18.95    2.08 
   4  -7  -1    6.21    0.86 
  -4  -7   1    3.58    0.80 
  -4  -7   1    4.30    0.71 
   4  -7  -1    5.56    0.93 
   4  -7  -1    5.24    0.93 
   4  -7  -1    7.50    0.82 
   4  -7  -1    6.94    0.81 
   4  -7  -1    6.77    1.06 
  -4  -7   1    4.18    0.91 
  -4  -7   1    3.98    0.88 
  -4  -7   1    3.98    0.82 
  -4   7   1    6.04    0.96 
   4   7  -1    5.11    0.77 
  -4   7   1    6.41    0.87 
   4   7  -1    5.79    0.75 
   4   7  -1    6.17    0.80 
  -4   7   1    4.83    0.76 
   4   7  -1    5.39    0.78 
   4   7  -1    6.42    0.87 
  -3  -7   1    8.96    0.92 
   3  -7  -1    6.52    1.06 
   3  -7  -1    7.65    0.92 
  -3  -7   1    5.61    1.00 
  -3  -7   1    6.48    1.14 
   3  -7  -1    7.78    1.12 
   3  -7  -1    5.65    0.96 
   3  -7  -1    4.84    0.92 
  -3  -7   1    8.16    1.18 
   3  -7  -1    6.67    1.13 
  -3  -7   1    7.84    1.07 
   3   7  -1    6.25    0.89 
   3   7  -1    5.92    0.94 
  -3   7   1    6.77    1.06 
   3   7  -1    6.85    0.94 
   3   7  -1    7.70    0.90 
   3   7  -1    6.57    0.90 
  -3   7   1    8.25    0.99 
  -3   7   1   10.11    1.02 
  -2  -7   1    2.16    0.49 
  -2  -7   1    4.30    0.76 
  -2  -7   1    2.48    0.57 
  -2  -7   1    1.85    0.62 
   2  -7  -1    4.46    0.82 
   2  -7  -1    4.14    0.70 
   2  -7  -1    2.47    0.63 
   2  -7  -1    3.16    0.57 
   2  -7  -1    2.48    0.54 
  -2  -7   1    1.92    0.55 
   2   7  -1    3.39    0.54 
   2   7  -1    3.68    0.54 
  -2   7   1    3.61    0.60 
   2   7  -1    2.73    0.50 
  -2   7   1    4.84    0.80 
   2   7  -1    3.31    0.60 
  -2   7   1    3.03    0.55 
   2   7  -1    3.87    0.56 
  -1  -7   1   28.89    2.95 
  -1  -7   1   23.24    2.90 
   1  -7  -1   30.10    2.94 
  -1  -7   1   24.25    2.76 
   1  -7  -1   25.55    3.01 
   1  -7  -1   22.27    2.89 
   1  -7  -1   29.19    2.82 
  -1  -7   1   30.96    3.06 
   1  -7  -1   23.44    2.97 
  -1  -7   1   27.67    3.03 
   1   7  -1   23.66    2.54 
   1   7  -1   26.68    2.73 
  -1   7   1   20.55    2.83 
  -1   7   1   26.32    2.83 
  -1   7   1   22.39    2.67 
   1   7  -1   25.49    2.83 
  -1   7   1   25.01    2.51 
   1   7  -1   24.85    2.54 
   1   7  -1   28.63    2.88 
   1   7  -1   25.42    2.50 
   0  -7  -1    6.18    1.11 
   0  -7  -1    7.36    1.02 
   0  -7   1    8.27    1.03 
   0  -7  -1    8.10    1.10 
   0  -7   1    9.72    1.24 
   0  -7  -1    6.79    1.17 
   0  -7   1    9.52    1.13 
   0  -7   1    5.03    0.99 
   0  -7   1    5.44    1.11 
   0  -7  -1    6.48    1.03 
   0   7   1    6.06    0.95 
   0   7  -1    6.85    0.90 
   0   7  -1    6.71    0.86 
   0   7   1    7.17    1.10 
   0   7   1    9.26    0.87 
   0   7  -1    8.72    0.99 
   0   7  -1    6.24    0.97 
   0   7  -1    7.30    1.17 
   0   7   1    9.45    1.00 
   0   7  -1    7.37    0.90 
   1  -7   1   50.34    5.52 
  -1  -7  -1   34.29    5.24 
  -1  -7  -1   46.90    5.23 
  -1  -7  -1   58.45    5.31 
   1  -7   1   59.63    5.12 
   1  -7   1   50.66    5.28 
   1  -7   1   48.51    5.34 
   1  -7   1   43.49    5.19 
  -1  -7  -1   59.49    5.04 
   1   7   1   47.19    4.89 
   1   7   1   39.59    5.16 
  -1   7  -1   47.24    4.52 
  -1   7  -1   42.60    5.17 
   1   7   1   44.96    4.64 
   1   7   1   45.08    5.00 
  -1   7  -1   51.62    4.62 
  -1   7  -1   46.62    4.89 
  -1   7  -1   52.40    5.09 
  -2  -7  -1    3.59    0.71 
  -2  -7  -1    3.23    0.68 
  -2  -7  -1    2.25    0.45 
   2  -7   1    3.06    0.69 
  -2  -7  -1    2.62    0.52 
   2  -7   1    3.07    0.53 
   2  -7   1    1.82    0.53 
   2  -7   1    1.64    0.48 
  -2  -7  -1    2.13    0.51 
   2  -7   1    2.19    0.55 
   2  -7   1    1.85    0.44 
   2   7   1    1.94    0.42 
   2   7   1    2.68    0.50 
   2   7   1    2.31    0.49 
  -2   7  -1    2.52    0.42 
  -2   7  -1    2.50    0.37 
  -2   7  -1    2.44    0.50 
  -2   7  -1    1.76    0.45 
   2   7   1    1.73    0.55 
  -2   7  -1    2.17    0.62 
  -3  -7  -1    8.20    1.11 
   3  -7   1    7.38    1.29 
  -3  -7  -1    9.06    1.41 
  -3  -7  -1    9.33    1.28 
   3  -7   1   11.13    1.26 
   3  -7   1    9.01    1.14 
   3  -7   1    9.89    1.27 
  -3  -7  -1   12.35    1.54 
   3  -7   1    9.13    1.35 
   3  -7   1   10.62    1.49 
  -3  -7  -1    7.29    1.25 
   3   7   1   12.53    1.22 
   3   7   1    8.66    1.13 
   3   7   1   10.11    1.32 
  -3   7  -1    9.26    1.04 
  -3   7  -1    9.51    1.23 
  -3   7  -1   10.45    1.24 
   3   7   1   10.29    1.18 
  -3   7  -1    9.76    1.40 
  -4  -7  -1    4.48    0.63 
  -4  -7  -1    4.81    0.79 
   4  -7   1    5.43    0.86 
  -4  -7  -1    6.60    0.99 
   4  -7   1    3.13    0.79 
   4  -7   1    4.46    0.83 
   4  -7   1    4.09    0.73 
  -4  -7  -1    4.72    0.75 
  -4  -7  -1    2.59    0.77 
   4  -7   1    4.52    0.66 
   4  -7   1    4.59    0.77 
  -4   7  -1    5.82    0.80 
  -4   7  -1    4.54    0.69 
   4   7   1    6.45    0.76 
   4   7   1    4.52    0.68 
   4   7   1    2.27    0.62 
  -4   7  -1    5.11    0.64 
  -4   7  -1    3.43    0.81 
   4   7   1    4.31    0.68 
   5  -7   1    0.22    0.23 
   5  -7   1    0.76    0.28 
   5  -7   1    0.01    0.32 
   5  -7   1    0.15    0.27 
   5  -7   1    0.55    0.44 
  -5  -7  -1    0.28    0.39 
  -5  -7  -1    0.48    0.38 
  -5  -7  -1    1.09    0.37 
  -5  -7  -1    0.51    0.31 
  -5  -7  -1    0.29    0.21 
  -5   7  -1    1.01    0.44 
   5   7   1    0.04    0.27 
  -5   7  -1    1.00    0.35 
   5   7   1   -0.14    0.26 
   5   7   1    0.91    0.30 
   5   7   1    0.80    0.31 
  -5   7  -1    0.71    0.30 
   6  -7   1    0.72    0.36 
   6  -7   1    2.09    0.60 
   6  -7   1    1.97    0.50 
  -6  -7  -1    1.16    0.45 
  -6  -7  -1    2.45    0.51 
   6  -7   1    1.96    0.57 
  -6  -7  -1    1.65    0.58 
  -6  -7  -1    1.21    0.49 
   6   7   1    1.60    0.43 
  -6   7  -1    2.50    0.53 
   6   7   1    3.07    0.49 
  -6   7  -1    1.74    0.60 
   6   7   1    2.06    0.45 
  -6   7  -1    1.85    0.42 
   6   7   1    1.29    0.42 
   7  -7   1    3.00    0.76 
  -7  -7  -1    3.56    0.64 
   7  -7   1    4.30    0.66 
  -7  -7  -1    4.35    0.88 
  -7  -7  -1    3.74    0.78 
   7  -7   1    3.23    0.77 
  -7  -7  -1    3.88    0.74 
  -7  -7  -1    3.35    0.68 
   7   7   1    2.87    0.63 
   7   7   1    4.29    0.64 
  -7   7  -1    2.83    0.55 
  -7   7  -1    3.64    0.80 
   7   7   1    2.86    0.59 
   7   7   1    2.84    0.62 
  -7   7  -1    2.98    0.64 
  -8  -7  -1    3.42    0.72 
   8  -7   1    3.90    0.79 
  -8  -7  -1    3.55    0.64 
  -8  -7  -1    2.38    0.72 
  -8  -7  -1    3.63    0.77 
   8  -7   1    2.19    0.74 
  -8  -7  -1    3.54    0.68 
  -8   7  -1    2.39    0.50 
   8   7   1    4.28    0.63 
  -8   7  -1    2.96    0.71 
   8   7   1    2.86    0.58 
  -8   7  -1    3.31    0.65 
   8   7   1    3.28    0.64 
   8   7   1    2.52    0.58 
  -9  -7  -1   12.64    1.75 
  -9  -7  -1   13.46    1.84 
   9  -7   1   11.87    1.78 
  -9  -7  -1   11.94    1.47 
  -9  -7  -1   14.18    1.69 
   9  -7   1    8.68    1.68 
  -9  -7  -1   10.78    1.64 
  -9   7  -1   10.83    1.37 
  -9   7  -1   13.49    1.74 
   9   7   1   11.19    1.52 
   9   7   1   13.74    1.46 
  -9   7  -1   13.60    1.60 
   9   7   1   14.50    1.51 
   9   7   1   11.81    1.54 
 -10  -7  -1    2.75    0.74 
 -10  -7  -1    2.57    0.64 
 -10  -7  -1    4.48    0.83 
  10  -7   1    4.43    0.99 
 -10  -7  -1    4.23    0.90 
  10  -7   1    2.56    0.77 
 -10  -7  -1    4.21    0.78 
  10   7   1    5.07    0.81 
  10   7   1    3.77    0.76 
  10   7   1    4.68    0.74 
 -10   7  -1    3.04    0.71 
 -10   7  -1    3.98    0.84 
  10   7   1    6.12    0.78 
 -10   7  -1    4.21    0.61 
  11  -7   1    5.45    1.10 
 -11  -7  -1    8.09    0.97 
 -11  -7  -1    4.99    0.93 
  11  -7   1    4.21    1.00 
  11  -7   1    4.40    0.84 
 -11  -7  -1    5.95    1.13 
 -11  -7  -1    5.75    0.96 
 -11  -7  -1    3.13    0.82 
  11   7   1    5.44    0.83 
  11   7   1    5.33    0.90 
  11   7   1    5.56    0.89 
 -11   7  -1    4.46    0.93 
 -11   7  -1    4.65    0.90 
 -12  -7  -1    1.38    0.51 
 -12  -7  -1    1.96    0.48 
  12  -7   1    1.57    0.68 
 -12  -7  -1    1.21    0.51 
 -12  -7  -1    1.08    0.46 
  12  -7   1    2.44    0.71 
 -12  -7  -1    1.78    0.67 
  12  -7   1    1.51    0.50 
  12   7   1    0.56    0.41 
  12   7   1    1.16    0.41 
 -12   7  -1    2.07    0.55 
  12   7   1    2.22    0.62 
 -12   7  -1    0.84    0.49 
  13  -7   1    6.03    1.25 
  13  -7   1    6.31    1.15 
 -13  -7  -1    5.83    1.03 
 -13  -7  -1    4.74    1.08 
 -13  -7  -1    4.84    0.98 
  13  -7   1    5.79    1.10 
  13   7   1    6.14    1.04 
 -13   7  -1    6.89    1.10 
  13   7   1    7.00    0.97 
 -13   7  -1    4.35    0.96 
 -14  -7  -1    2.81    0.87 
  14  -7   1    2.57    0.93 
 -14  -7  -1    6.23    0.95 
 -14  -7  -1    2.88    0.80 
  14  -7   1    5.03    1.03 
  14   7   1    5.04    0.81 
 -14   7  -1    4.87    0.92 
  14   7   1    4.49    0.89 
 -14   7  -1    3.50    0.84 
 -15  -7  -1    5.91    1.14 
 -15  -7  -1    5.30    0.98 
  15  -7   1    4.04    1.05 
  15  -7   1    4.02    1.14 
 -15  -7  -1    6.56    1.08 
  15   7   1    5.12    1.00 
 -15   7  -1    4.88    1.00 
 -15   7  -1    5.01    0.97 
  15   7   1    5.87    0.90 
  16  -7   1    0.07    0.45 
 -16  -7  -1   -0.39    0.37 
 -16  -7  -1    0.87    0.52 
 -16  -7  -1   -0.24    0.38 
  16  -7   1    0.67    0.63 
  16   7   1    0.26    0.34 
  16   7   1    0.04    0.42 
 -16   7  -1    0.17    0.45 
 -16   7  -1    0.34    0.42 
 -17  -7  -1    1.17    0.55 
 -17  -7  -1    0.56    0.53 
  17  -7   1    0.77    0.54 
 -17  -7  -1    0.86    0.57 
  17  -7   1    2.47    0.87 
 -17   7  -1    0.36    0.48 
  17   7   1    0.65    0.38 
 -17   7  -1    0.73    0.50 
  17   7   1   -0.02    0.42 
 -18  -7  -1    1.38    0.57 
 -18  -7  -1    0.87    0.56 
  18  -7   1    0.56    0.70 
 -18  -7  -1    0.50    0.50 
  18  -7   1    0.32    0.56 
 -18   7  -1    0.31    0.53 
  18   7   1    0.84    0.61 
 -18   7  -1    1.23    0.58 
  19  -7   1    2.82    0.94 
 -19  -7  -1    1.31    0.69 
 -19  -7  -1    3.57    0.84 
  19  -7   1    2.55    1.02 
 -19  -7  -1    3.03    0.83 
 -19   7  -1    4.07    0.88 
  19   7   1    3.22    0.82 
 -19   7  -1    3.18    0.83 
 -20  -7  -1   -0.25    0.55 
 -20  -7  -1    0.29    0.50 
  20  -7   1    0.57    0.79 
  20  -7   1    0.22    0.62 
  20   7   1    0.01    0.48 
 -20   7  -1   -0.25    0.54 
 -20   7  -1   -0.35    0.37 
  19  -8  -1    0.11    0.57 
 -19  -8   1   -0.45    0.44 
 -19  -8   1    0.15    0.55 
 -19  -8   1    0.24    0.52 
  19   8  -1   -0.52    0.35 
 -19   8   1   -0.61    0.46 
  18  -8  -1    0.34    0.71 
  18  -8  -1    0.29    0.60 
 -18  -8   1    0.01    0.44 
 -18  -8   1    0.09    0.45 
 -18  -8   1    1.03    0.65 
  18   8  -1    0.27    0.39 
  18   8  -1   -0.11    0.49 
 -18   8   1   -0.74    0.41 
 -18   8   1    0.50    0.55 
 -17  -8   1    0.29    0.48 
 -17  -8   1    0.83    0.58 
 -17  -8   1   -0.01    0.43 
  17  -8  -1    0.85    0.87 
  17  -8  -1    0.06    0.54 
  17   8  -1   -0.25    0.48 
 -17   8   1   -0.02    0.49 
 -17   8   1   -0.06    0.34 
  17   8  -1    0.29    0.41 
 -16  -8   1    4.94    1.08 
  16  -8  -1    5.45    1.38 
  16  -8  -1    6.89    1.38 
 -16  -8   1    8.05    1.21 
 -16  -8   1    4.49    1.16 
 -16   8   1    4.74    1.04 
  16   8  -1    6.18    1.13 
  16   8  -1    4.95    0.90 
 -16   8   1    6.59    1.17 
  15  -8  -1    1.00    0.64 
 -15  -8   1    0.86    0.49 
 -15  -8   1   -0.25    0.55 
  15  -8  -1    0.20    0.67 
 -15  -8   1    0.00    0.37 
  15   8  -1    0.24    0.32 
 -15   8   1    0.32    0.48 
  15   8  -1   -0.53    0.39 
 -15   8   1   -0.12    0.30 
 -14  -8   1   -0.32    0.53 
 -14  -8   1    0.05    0.42 
  14  -8  -1    0.12    0.58 
 -14  -8   1    0.31    0.45 
  14  -8  -1    0.01    0.44 
  14   8  -1   -0.01    0.28 
 -14   8   1   -0.18    0.45 
  14   8  -1   -0.18    0.41 
 -14   8   1    0.31    0.36 
  13  -8  -1    1.02    0.60 
 -13  -8   1    1.09    0.69 
 -13  -8   1    1.02    0.53 
  13  -8  -1    0.46    0.55 
 -13  -8   1    0.86    0.50 
 -13   8   1   -0.01    0.43 
  13   8  -1    0.46    0.38 
  13   8  -1   -0.08    0.40 
 -13   8   1   -0.47    0.37 
  12  -8  -1    1.46    0.45 
 -12  -8   1    1.83    0.66 
 -12  -8   1    1.74    0.56 
  12  -8  -1    1.15    0.64 
 -12  -8   1    0.81    0.55 
  12  -8  -1    1.03    0.69 
 -12   8   1    2.36    0.66 
  12   8  -1    1.62    0.57 
  12   8  -1    1.83    0.52 
 -12   8   1    0.72    0.44 
  11  -8  -1    5.50    0.77 
  11  -8  -1    2.30    0.79 
 -11  -8   1    3.64    0.79 
  11  -8  -1    1.49    0.82 
 -11  -8   1    1.91    0.78 
 -11  -8   1    2.98    0.80 
 -11   8   1    2.50    0.76 
 -11   8   1    5.18    0.67 
  11   8  -1    4.43    0.79 
 -11   8   1    5.14    0.90 
  11   8  -1    2.28    0.68 
 -10  -8   1    7.09    1.28 
  10  -8  -1    9.22    1.20 
 -10  -8   1    9.86    1.28 
 -10  -8   1    8.31    1.35 
 -10  -8   1    9.17    1.44 
  10  -8  -1    8.93    1.49 
  10  -8  -1    9.57    1.55 
 -10  -8   1    9.17    1.50 
 -10   8   1    8.40    1.31 
 -10   8   1    8.44    1.09 
  10   8  -1    9.39    1.29 
  10   8  -1    8.88    1.26 
 -10   8   1    7.54    1.29 
  10   8  -1    8.01    1.23 
  -9  -8   1    0.92    0.51 
   9  -8  -1    1.75    0.41 
   9  -8  -1    1.11    0.61 
  -9  -8   1    1.48    0.62 
   9  -8  -1    1.35    0.65 
   9  -8  -1    1.33    0.53 
  -9  -8   1    1.24    0.51 
  -9  -8   1    1.69    0.52 
  -9  -8   1    0.26    0.36 
   9   8  -1    0.96    0.45 
  -9   8   1    0.80    0.33 
  -9   8   1    1.65    0.50 
   9   8  -1    1.44    0.47 
  -9   8   1    1.39    0.56 
   9   8  -1    1.36    0.51 
  -8  -8   1   19.50    2.59 
   8  -8  -1   19.54    2.43 
  -8  -8   1   17.45    2.32 
   8  -8  -1   20.14    2.40 
  -8  -8   1   18.45    2.39 
   8  -8  -1   16.43    2.28 
  -8  -8   1   22.81    2.20 
  -8  -8   1   20.14    2.41 
   8  -8  -1   17.16    2.29 
  -8   8   1   16.87    2.21 
   8   8  -1   16.21    2.11 
  -8   8   1   21.54    2.09 
   8   8  -1   20.65    2.12 
  -8   8   1   20.50    2.30 
   8   8  -1   20.15    2.11 
   7  -8  -1    8.93    1.32 
  -7  -8   1    8.31    1.38 
   7  -8  -1    9.05    1.44 
   7  -8  -1    6.87    1.14 
  -7  -8   1    6.82    1.22 
   7  -8  -1    7.60    1.29 
  -7  -8   1    7.16    1.23 
   7  -8  -1    8.55    1.19 
  -7  -8   1    9.99    1.43 
   7   8  -1    9.78    1.17 
  -7   8   1    8.05    1.26 
   7   8  -1    7.47    1.14 
  -7   8   1    7.66    1.07 
  -7   8   1    9.52    1.27 
   7   8  -1    8.56    1.18 
   7   8  -1    7.57    1.11 
  -6  -8   1   10.83    1.46 
   6  -8  -1    9.02    1.52 
  -6  -8   1    8.91    1.48 
  -6  -8   1    8.78    1.47 
   6  -8  -1    9.20    1.45 
   6  -8  -1    8.93    1.26 
  -6  -8   1    9.45    1.39 
   6  -8  -1   10.39    1.39 
   6  -8  -1    8.82    1.41 
  -6   8   1   10.58    1.18 
  -6   8   1   11.36    1.50 
   6   8  -1    9.40    1.26 
   6   8  -1    9.10    1.30 
   6   8  -1    9.99    1.20 
  -6   8   1    8.83    1.32 
   6   8  -1    9.43    1.23 
   5  -8  -1   -0.02    0.23 
   5  -8  -1   -0.04    0.25 
  -5  -8   1    0.47    0.39 
  -5  -8   1   -0.04    0.35 
   5  -8  -1   -0.25    0.32 
  -5  -8   1   -0.04    0.38 
  -5  -8   1    0.07    0.28 
  -5  -8   1    0.01    0.24 
   5  -8  -1    0.40    0.39 
   5  -8  -1    0.05    0.35 
  -5   8   1   -0.41    0.17 
   5   8  -1    0.03    0.26 
  -5   8   1   -0.09    0.37 
   5   8  -1    0.38    0.25 
   5   8  -1    0.03    0.31 
   5   8  -1    0.44    0.28 
  -5   8   1    0.12    0.30 
   5   8  -1    0.56    0.32 
  -4  -8   1   12.35    1.74 
  -4  -8   1   16.84    1.60 
   4  -8  -1   14.47    1.70 
   4  -8  -1   12.41    1.80 
  -4  -8   1   15.77    2.03 
   4  -8  -1   16.76    2.07 
   4  -8  -1   12.17    1.83 
  -4  -8   1   17.26    2.03 
  -4  -8   1   12.40    1.81 
   4  -8  -1   13.94    1.72 
   4   8  -1    9.77    1.60 
   4   8  -1   13.51    1.52 
   4   8  -1   13.73    1.52 
  -4   8   1   12.97    1.56 
   4   8  -1   12.91    1.46 
  -4   8   1   11.64    1.66 
  -4   8   1   13.08    1.79 
   4   8  -1   16.41    1.65 
  -3  -8   1    9.27    1.59 
   3  -8  -1    9.21    1.42 
  -3  -8   1   10.78    1.51 
  -3  -8   1    8.70    1.45 
   3  -8  -1   14.17    1.44 
   3  -8  -1   13.51    1.74 
  -3  -8   1    8.14    1.51 
   3  -8  -1   11.50    1.60 
   3  -8  -1   11.50    1.51 
  -3  -8   1   11.31    1.30 
  -3   8   1   11.18    1.55 
   3   8  -1   10.65    1.54 
   3   8  -1   11.51    1.25 
   3   8  -1   11.67    1.34 
   3   8  -1   11.35    1.34 
  -3   8   1    9.40    1.32 
   3   8  -1    8.38    1.21 
  -3   8   1    9.72    1.44 
   3   8  -1   12.17    1.34 
  -2  -8   1    9.89    1.52 
   2  -8  -1    9.02    1.60 
   2  -8  -1   12.77    1.47 
  -2  -8   1   11.08    1.69 
   2  -8  -1   12.18    1.66 
  -2  -8   1   11.20    1.37 
   2  -8  -1    9.37    1.47 
   2  -8  -1   15.78    1.54 
  -2  -8   1    8.52    1.51 
  -2  -8   1   10.96    1.65 
   2   8  -1   12.88    1.40 
   2   8  -1   10.69    1.24 
  -2   8   1   12.64    1.45 
  -2   8   1   15.23    1.70 
   2   8  -1   12.20    1.28 
  -2   8   1    9.95    1.40 
   2   8  -1   13.35    1.33 
   2   8  -1    8.93    1.36 
   2   8  -1   13.00    1.67 
   1  -8  -1    3.42    0.66 
   1  -8  -1    4.05    0.68 
   1  -8  -1    2.99    0.74 
   1  -8  -1    3.79    0.69 
  -1  -8   1    3.68    0.69 
  -1  -8   1    1.25    0.66 
  -1  -8   1    1.57    0.63 
  -1  -8   1    3.41    0.68 
  -1  -8   1    3.60    0.65 
   1  -8  -1    4.06    0.85 
  -1   8   1    3.55    0.49 
   1   8  -1    2.89    0.75 
   1   8  -1    2.88    0.60 
   1   8  -1    3.58    0.56 
   1   8  -1    3.22    0.58 
  -1   8   1    2.66    0.58 
  -1   8   1    2.80    0.60 
   1   8  -1    4.21    0.59 
  -1   8   1    2.76    0.71 
   0  -8   1    2.10    0.54 
   0  -8   1    3.37    0.61 
   0  -8  -1    2.67    0.71 
   0  -8   1    2.17    0.61 
   0  -8  -1    1.84    0.49 
   0  -8  -1    3.36    0.59 
   0  -8   1    2.34    0.67 
   0  -8  -1    3.39    0.65 
   0  -8  -1    1.04    0.56 
   0  -8   1    1.99    0.54 
   0   8  -1    2.07    0.65 
   0   8  -1    3.16    0.55 
   0   8  -1    2.57    0.45 
   0   8   1    3.17    0.57 
   0   8   1    2.19    0.51 
   0   8  -1    2.69    0.48 
   0   8   1    2.42    0.65 
   0   8   1    2.88    0.48 
   0   8  -1    2.09    0.53 
   1  -8   1    2.57    0.65 
  -1  -8  -1    1.87    0.47 
   1  -8   1    1.43    0.51 
  -1  -8  -1    1.51    0.49 
   1  -8   1    1.98    0.56 
  -1  -8  -1    2.90    0.74 
  -1  -8  -1    2.78    0.68 
   1  -8   1    2.78    0.56 
   1  -8   1    3.01    0.73 
  -1  -8  -1    3.30    0.58 
   1   8   1    1.28    0.53 
  -1   8  -1    2.51    0.54 
   1   8   1    3.20    0.59 
  -1   8  -1    3.28    0.45 
  -1   8  -1    2.66    0.48 
  -1   8  -1    2.10    0.51 
   1   8   1    3.59    0.51 
   1   8   1    1.69    0.47 
  -1   8  -1    1.96    0.63 
   2  -8   1    2.80    0.62 
  -2  -8  -1    2.87    0.57 
  -2  -8  -1    3.33    0.65 
  -2  -8  -1    2.37    0.62 
  -2  -8  -1    3.19    0.77 
   2  -8   1    3.72    0.67 
   2  -8   1    2.47    0.64 
  -2  -8  -1    5.39    0.97 
   2  -8   1    2.53    0.70 
   2  -8   1    2.85    0.77 
   2   8   1    4.22    0.65 
   2   8   1    3.47    0.57 
   2   8   1    3.22    0.73 
  -2   8  -1    2.72    0.57 
  -2   8  -1    2.21    0.71 
   2   8   1    3.52    0.65 
  -2   8  -1    3.42    0.63 
   3  -8   1    2.69    0.66 
   3  -8   1    2.10    0.51 
  -3  -8  -1    1.68    0.62 
   3  -8   1    1.40    0.60 
  -3  -8  -1    3.30    0.50 
   3  -8   1    1.79    0.51 
   3  -8   1    1.30    0.55 
  -3  -8  -1    2.41    0.55 
  -3  -8  -1    2.04    0.54 
  -3  -8  -1    2.67    0.68 
   3   8   1    1.71    0.59 
   3   8   1    1.43    0.45 
  -3   8  -1    1.95    0.68 
   3   8   1    2.55    0.48 
  -3   8  -1    2.25    0.50 
   3   8   1    2.30    0.51 
  -3   8  -1    1.67    0.48 
  -4  -8  -1    0.43    0.46 
   4  -8   1    0.58    0.33 
  -4  -8  -1    0.90    0.31 
   4  -8   1    0.94    0.51 
  -4  -8  -1    0.80    0.35 
  -4  -8  -1    0.65    0.34 
   4  -8   1    0.43    0.33 
  -4  -8  -1    0.96    0.48 
   4  -8   1    1.91    0.57 
   4  -8   1    1.01    0.48 
  -4   8  -1    0.30    0.30 
   4   8   1    0.99    0.34 
   4   8   1    0.70    0.32 
  -4   8  -1    0.91    0.52 
  -4   8  -1    0.37    0.30 
   4   8   1    0.15    0.29 
   5  -8   1    6.98    1.26 
   5  -8   1    8.37    1.29 
  -5  -8  -1    9.53    1.09 
  -5  -8  -1    6.52    1.26 
  -5  -8  -1   10.41    1.53 
   5  -8   1    9.99    1.52 
  -5  -8  -1   13.26    1.62 
   5  -8   1    6.62    1.27 
  -5  -8  -1    8.86    1.33 
   5  -8   1   11.03    1.49 
  -5   8  -1   11.87    1.29 
  -5   8  -1   11.80    1.51 
   5   8   1    8.62    1.16 
   5   8   1   11.73    1.20 
   5   8   1    6.74    1.16 
  -5   8  -1    9.14    1.21 
   6  -8   1    8.40    1.24 
  -6  -8  -1    6.04    1.24 
   6  -8   1    8.32    1.30 
  -6  -8  -1    7.35    1.21 
   6  -8   1    9.30    1.22 
   6  -8   1    7.09    1.11 
   6  -8   1    7.23    1.30 
  -6  -8  -1    6.87    1.28 
  -6  -8  -1    7.97    1.19 
  -6   8  -1    7.38    1.03 
  -6   8  -1    7.58    1.27 
   6   8   1    6.22    0.99 
   6   8   1    8.33    1.09 
   6   8   1    8.44    1.10 
   6   8   1    7.13    1.07 
  -6   8  -1    8.51    1.19 
   7  -8   1    1.02    0.56 
  -7  -8  -1    1.04    0.46 
  -7  -8  -1    1.67    0.50 
   7  -8   1    0.51    0.34 
   7  -8   1    0.68    0.44 
  -7  -8  -1    1.34    0.53 
   7  -8   1    0.77    0.53 
  -7  -8  -1    2.06    0.64 
  -7  -8  -1    1.76    0.50 
   7   8   1    0.94    0.37 
   7   8   1    2.08    0.49 
  -7   8  -1    0.95    0.40 
   7   8   1    1.34    0.44 
   7   8   1    1.52    0.45 
  -7   8  -1    1.22    0.53 
  -7   8  -1    0.87    0.36 
   8  -8   1    7.30    1.41 
  -8  -8  -1   10.41    1.61 
  -8  -8  -1   10.49    1.46 
  -8  -8  -1   13.14    1.54 
   8  -8   1   11.96    1.72 
  -8  -8  -1   13.54    1.82 
   8  -8   1   10.91    1.57 
   8  -8   1    7.56    1.54 
  -8  -8  -1   12.63    1.65 
   8   8   1    9.41    1.39 
  -8   8  -1   12.58    1.31 
   8   8   1    9.83    1.38 
  -8   8  -1   12.88    1.69 
  -8   8  -1   10.53    1.51 
   8   8   1   11.24    1.44 
   8   8   1   12.52    1.44 
  -9  -8  -1    5.62    0.92 
  -9  -8  -1    7.33    1.13 
  -9  -8  -1    7.59    1.08 
   9  -8   1    3.99    1.01 
  -9  -8  -1    5.30    0.95 
   9  -8   1    3.68    0.97 
  -9  -8  -1    4.76    1.10 
   9  -8   1    4.28    0.84 
   9   8   1    4.49    0.84 
   9   8   1    5.48    0.88 
  -9   8  -1    6.68    0.84 
  -9   8  -1    4.64    0.92 
   9   8   1    4.95    0.86 
  -9   8  -1    5.69    1.05 
  10  -8   1    5.93    1.16 
 -10  -8  -1    5.70    1.02 
 -10  -8  -1    6.93    1.24 
  10  -8   1    8.04    1.04 
 -10  -8  -1    4.68    0.90 
 -10  -8  -1    6.30    1.09 
 -10  -8  -1    6.78    1.09 
  10  -8   1    5.22    1.19 
 -10   8  -1    3.94    0.95 
 -10   8  -1    5.04    0.79 
  10   8   1    6.49    0.97 
 -10   8  -1    4.42    0.92 
  10   8   1    5.59    0.95 
  11  -8   1    0.75    0.54 
 -11  -8  -1    0.07    0.38 
 -11  -8  -1    0.26    0.30 
  11  -8   1   -0.23    0.43 
 -11  -8  -1   -0.55    0.30 
 -11  -8  -1   -0.05    0.36 
 -11  -8  -1   -0.69    0.42 
 -11   8  -1   -0.12    0.41 
  11   8   1   -0.09    0.35 
 -11   8  -1   -0.03    0.36 
  11   8   1    0.20    0.32 
  12  -8   1    0.72    0.54 
  12  -8   1    1.22    0.69 
 -12  -8  -1    0.05    0.48 
 -12  -8  -1    0.33    0.41 
 -12  -8  -1    0.52    0.43 
  12   8   1    0.45    0.37 
 -12   8  -1    0.26    0.40 
  12   8   1    0.84    0.49 
 -12   8  -1    0.44    0.47 
  13  -8   1    5.47    1.18 
  13  -8   1    3.68    1.02 
 -13  -8  -1    4.91    0.94 
 -13  -8  -1    2.26    0.88 
 -13  -8  -1    5.03    0.96 
  13   8   1    4.83    0.90 
 -13   8  -1    5.00    0.97 
 -13   8  -1    4.42    0.95 
  13   8   1    3.06    0.74 
 -14  -8  -1    1.69    0.58 
 -14  -8  -1    1.43    0.56 
  14  -8   1    2.12    0.73 
 -14  -8  -1    1.10    0.62 
  14  -8   1    0.62    0.72 
 -14   8  -1    0.30    0.47 
  14   8   1    1.25    0.44 
 -14   8  -1    1.53    0.63 
  14   8   1   -0.14    0.45 
 -15  -8  -1   -0.23    0.52 
  15  -8   1   -0.56    0.56 
 -15  -8  -1   -0.03    0.45 
 -15  -8  -1   -0.05    0.39 
  15  -8   1   -0.02    0.49 
 -15   8  -1   -0.16    0.46 
  15   8   1    0.09    0.39 
 -15   8  -1   -0.31    0.32 
  15   8   1    0.02    0.31 
 -16  -8  -1    4.16    1.11 
 -16  -8  -1    4.70    0.94 
 -16  -8  -1    5.01    0.98 
  16  -8   1    3.77    1.15 
  16  -8   1    3.17    0.95 
  16   8   1    3.96    0.73 
 -16   8  -1    1.30    0.74 
 -16   8  -1    4.36    0.91 
  16   8   1    3.90    0.89 
  17  -8   1    0.18    0.61 
 -17  -8  -1    0.71    0.56 
 -17  -8  -1    0.12    0.52 
 -17  -8  -1   -0.50    0.45 
  17  -8   1   -0.42    0.64 
  17   8   1   -0.12    0.33 
 -17   8  -1    0.23    0.46 
  17   8   1   -0.60    0.40 
 -17   8  -1    0.51    0.59 
  18  -8   1    0.23    0.69 
  18  -8   1   -0.24    0.52 
 -18  -8  -1   -0.33    0.62 
 -18  -8  -1   -0.51    0.43 
 -18  -8  -1    0.24    0.52 
  18   8   1   -0.22    0.36 
  18   8   1   -0.24    0.57 
 -18   8  -1    0.34    0.50 
 -18   8  -1    0.17    0.49 
 -16  -9   1   -0.01    0.46 
  16  -9  -1   -0.46    0.56 
 -16  -9   1   -0.70    0.40 
 -16  -9   1   -0.34    0.68 
  16  -9  -1   -0.26    0.32 
  16  -9  -1   -0.63    0.64 
 -16   9   1   -0.28    0.53 
  16   9  -1   -0.28    0.37 
 -16   9   1   -0.09    0.42 
  16   9  -1    0.99    0.62 
 -15  -9   1    2.00    0.75 
  15  -9  -1    3.12    1.03 
  15  -9  -1    3.85    1.07 
  15  -9  -1    3.21    0.71 
 -15  -9   1    2.76    0.94 
 -15  -9   1    4.36    0.94 
  15   9  -1    3.09    0.76 
  15   9  -1    4.60    0.97 
 -15   9   1    3.12    0.82 
 -15   9   1    5.26    1.05 
 -14  -9   1    1.04    0.57 
  14  -9  -1    0.71    0.38 
  14  -9  -1    0.28    0.72 
 -14  -9   1    0.78    0.66 
  14  -9  -1   -0.17    0.58 
 -14  -9   1   -0.16    0.44 
 -14   9   1    0.76    0.59 
  14   9  -1    1.38    0.62 
 -14   9   1    0.33    0.47 
  14   9  -1    0.25    0.38 
  13  -9  -1    5.64    1.35 
 -13  -9   1    6.57    1.39 
  13  -9  -1    6.27    1.41 
 -13  -9   1    7.18    1.26 
 -13  -9   1    6.58    1.29 
  13  -9  -1    6.84    1.08 
  13   9  -1   10.95    1.39 
  13   9  -1    7.13    1.12 
 -13   9   1    6.81    1.25 
 -13   9   1    6.55    1.19 
 -12  -9   1    1.62    0.60 
  12  -9  -1    1.96    0.69 
  12  -9  -1    2.47    0.54 
 -12  -9   1    1.09    0.61 
  12  -9  -1    0.85    0.68 
  12  -9  -1    0.63    0.69 
 -12  -9   1    1.93    0.68 
 -12   9   1    1.22    0.61 
 -12   9   1    1.54    0.63 
  12   9  -1    1.59    0.59 
  12   9  -1    1.73    0.54 
 -11  -9   1    8.49    1.31 
  11  -9  -1    5.79    1.14 
 -11  -9   1    7.46    1.22 
  11  -9  -1    5.11    1.22 
  11  -9  -1    6.12    0.98 
  11  -9  -1    5.67    1.26 
 -11  -9   1    5.48    1.26 
  11   9  -1    5.79    1.03 
 -11   9   1    7.36    1.24 
  11   9  -1    4.95    0.96 
 -11   9   1    5.32    1.08 
  10  -9  -1    3.21    0.95 
  10  -9  -1    5.79    1.05 
  10  -9  -1    6.41    1.20 
 -10  -9   1    3.23    0.82 
  10  -9  -1    3.51    0.73 
  10  -9  -1    3.57    0.82 
 -10  -9   1    3.88    1.00 
 -10  -9   1    4.20    0.96 
 -10   9   1    2.97    0.81 
  10   9  -1    4.60    0.81 
 -10   9   1    4.94    0.94 
 -10   9   1    5.56    0.74 
  10   9  -1    3.05    0.78 
   9  -9  -1    0.30    0.43 
  -9  -9   1    0.65    0.46 
  -9  -9   1    0.21    0.36 
   9  -9  -1    0.13    0.55 
  -9  -9   1    0.40    0.64 
  -9  -9   1    0.00    0.41 
   9  -9  -1    0.70    0.40 
   9  -9  -1    0.71    0.34 
   9  -9  -1    0.57    0.54 
  -9  -9   1   -0.32    0.31 
   9   9  -1    0.34    0.36 
  -9   9   1    0.75    0.52 
   9   9  -1    0.41    0.41 
  -9   9   1    0.35    0.29 
  -9   9   1    0.80    0.40 
  -8  -9   1   -0.08    0.33 
  -8  -9   1    0.11    0.35 
  -8  -9   1    0.37    0.40 
   8  -9  -1    0.29    0.35 
  -8  -9   1   -0.28    0.43 
   8  -9  -1   -0.02    0.35 
   8  -9  -1    0.08    0.56 
   8  -9  -1    0.15    0.28 
   8  -9  -1    0.07    0.34 
  -8  -9   1   -0.37    0.46 
   8   9  -1    0.34    0.36 
  -8   9   1    0.60    0.28 
  -8   9   1    0.19    0.51 
  -8   9   1    0.17    0.36 
   8   9  -1    0.51    0.39 
  -7  -9   1    6.82    1.17 
   7  -9  -1    9.02    1.09 
  -7  -9   1    4.49    1.12 
  -7  -9   1    5.82    1.22 
   7  -9  -1    8.29    1.31 
   7  -9  -1    5.09    0.98 
   7  -9  -1    6.71    1.23 
  -7  -9   1    6.22    1.12 
   7  -9  -1    5.88    1.24 
  -7   9   1    5.71    1.04 
  -7   9   1    6.30    1.15 
  -7   9   1    5.69    0.91 
   7   9  -1    7.90    1.13 
   7   9  -1    7.85    1.05 
  -6  -9   1    6.38    1.04 
  -6  -9   1    7.85    1.30 
   6  -9  -1    4.81    1.03 
   6  -9  -1    6.31    1.11 
   6  -9  -1    5.97    0.97 
   6  -9  -1    5.36    1.16 
  -6  -9   1    3.93    0.98 
  -6  -9   1    4.99    1.11 
   6  -9  -1    5.91    0.93 
   6   9  -1    5.52    0.88 
   6   9  -1    7.57    1.08 
   6   9  -1    6.78    0.97 
  -6   9   1    6.26    1.02 
  -6   9   1    5.01    0.85 
  -6   9   1    4.10    0.98 
   5  -9  -1   17.19    2.25 
  -5  -9   1   14.14    2.25 
   5  -9  -1   17.03    2.30 
   5  -9  -1   16.75    2.56 
   5  -9  -1   16.63    2.37 
  -5  -9   1   17.95    2.57 
  -5  -9   1   19.37    2.58 
  -5  -9   1   21.53    2.42 
   5  -9  -1   22.95    2.42 
   5   9  -1   22.36    2.22 
  -5   9   1   16.49    2.07 
   5   9  -1   19.99    2.19 
  -5   9   1   19.00    2.28 
   5   9  -1   19.13    2.07 
   5   9  -1   20.02    2.06 
  -5   9   1   21.65    2.29 
  -4  -9   1   -0.20    0.40 
   4  -9  -1    0.14    0.39 
   4  -9  -1    0.20    0.29 
   4  -9  -1    0.08    0.28 
  -4  -9   1    0.53    0.43 
  -4  -9   1    0.38    0.47 
  -4  -9   1    0.54    0.37 
   4  -9  -1   -0.13    0.41 
   4  -9  -1    0.17    0.47 
   4   9  -1    0.02    0.31 
  -4   9   1   -0.03    0.31 
  -4   9   1   -0.36    0.40 
  -4   9   1   -0.01    0.25 
   4   9  -1   -0.03    0.47 
   4   9  -1   -0.02    0.30 
   4   9  -1   -0.10    0.26 
   3  -9  -1    3.43    0.65 
  -3  -9   1    4.19    0.73 
  -3  -9   1    2.07    0.77 
   3  -9  -1    2.85    0.84 
  -3  -9   1    2.36    0.56 
  -3  -9   1    1.95    0.64 
  -3  -9   1    2.39    0.80 
   3  -9  -1    3.79    0.76 
   3  -9  -1    2.48    0.73 
   3  -9  -1    4.16    0.74 
  -3   9   1    2.83    0.78 
   3   9  -1    2.93    0.59 
  -3   9   1    2.47    0.61 
   3   9  -1    3.67    0.66 
   3   9  -1    3.89    0.89 
  -3   9   1    2.22    0.57 
   3   9  -1    2.75    0.62 
   2  -9  -1    0.16    0.36 
  -2  -9   1   -0.05    0.28 
  -2  -9   1   -0.18    0.30 
   2  -9  -1    0.26    0.46 
  -2  -9   1    0.14    0.43 
  -2  -9   1    0.61    0.45 
  -2  -9   1    0.02    0.38 
   2  -9  -1    0.31    0.42 
   2  -9  -1   -0.50    0.32 
   2  -9  -1    0.07    0.31 
   2   9  -1    0.05    0.27 
  -2   9   1    0.03    0.26 
   2   9  -1    0.55    0.31 
   2   9  -1    0.23    0.31 
  -2   9   1   -0.54    0.40 
   2   9  -1    0.46    0.46 
  -2   9   1   -0.18    0.29 
  -1  -9   1    4.74    0.84 
   1  -9  -1    3.78    0.93 
  -1  -9   1    2.65    0.66 
  -1  -9   1    3.56    0.87 
   1  -9  -1    1.93    0.73 
   1  -9  -1    3.51    0.71 
   1  -9  -1    3.09    0.73 
  -1  -9   1    2.88    0.69 
   1  -9  -1    4.10    0.75 
  -1  -9   1    3.57    0.91 
  -1   9   1    2.74    0.74 
   1   9  -1    4.49    0.64 
   1   9  -1    5.48    0.77 
   1   9  -1    3.49    0.69 
  -1   9   1    3.88    0.71 
   1   9  -1    5.31    1.00 
  -1   9   1    3.89    0.71 
   0  -9  -1    5.38    0.95 
   0  -9  -1    4.06    0.84 
   0  -9  -1    5.01    0.88 
   0  -9   1    5.31    0.94 
   0  -9  -1    4.23    0.98 
   0  -9   1    5.59    0.92 
   0  -9   1    5.07    1.10 
   0  -9   1    5.49    1.06 
   0  -9   1    4.92    0.91 
   0  -9  -1    6.63    1.20 
   0   9   1    5.58    0.90 
   0   9   1    6.99    0.95 
   0   9   1    5.68    1.04 
   0   9  -1    5.63    1.07 
   0   9  -1    4.89    0.86 
   0   9  -1    4.59    0.86 
  -1  -9  -1    3.71    0.88 
  -1  -9  -1    3.17    0.70 
  -1  -9  -1    4.72    1.01 
   1  -9   1    5.40    0.86 
  -1  -9  -1    4.62    0.84 
   1  -9   1    4.14    0.92 
  -1  -9  -1    4.54    0.74 
   1  -9   1    3.85    0.81 
   1  -9   1    2.77    0.71 
   1  -9   1    4.97    1.00 
  -1   9  -1    4.43    0.75 
  -1   9  -1    4.29    0.76 
   1   9   1    3.08    0.83 
  -1   9  -1    3.17    0.88 
   1   9   1    4.84    0.67 
   1   9   1    2.86    0.67 
   1   9   1    4.49    0.77 
   2  -9   1    7.38    1.16 
  -2  -9  -1    7.32    1.35 
   2  -9   1    6.98    1.10 
   2  -9   1    6.64    1.15 
   2  -9   1    7.45    1.25 
  -2  -9  -1    9.54    1.21 
   2  -9   1    7.64    1.36 
  -2  -9  -1    5.59    1.08 
  -2  -9  -1    9.02    1.41 
  -2   9  -1    6.34    1.03 
   2   9   1    7.33    1.08 
  -2   9  -1    6.35    1.19 
   2   9   1    6.29    1.06 
  -2   9  -1    7.85    1.12 
   2   9   1    7.10    0.96 
   3  -9   1    0.25    0.46 
   3  -9   1    0.38    0.44 
  -3  -9  -1    0.24    0.37 
  -3  -9  -1   -0.19    0.37 
   3  -9   1    0.12    0.31 
  -3  -9  -1    0.41    0.35 
   3  -9   1   -0.07    0.32 
  -3  -9  -1    0.42    0.47 
   3  -9   1    0.25    0.31 
   3   9   1   -0.14    0.23 
   3   9   1    0.34    0.32 
  -3   9  -1    0.72    0.36 
   3   9   1    0.14    0.30 
  -3   9  -1   -0.20    0.48 
  -3   9  -1    0.51    0.33 
  -4  -9  -1    1.04    0.44 
  -4  -9  -1    1.59    0.66 
  -4  -9  -1    0.95    0.59 
  -4  -9  -1    1.49    0.49 
   4  -9   1    1.34    0.44 
   4  -9   1    1.74    0.70 
   4  -9   1    2.12    0.56 
   4  -9   1    1.07    0.53 
   4  -9   1    0.50    0.45 
  -4   9  -1    1.06    0.60 
   4   9   1    1.28    0.44 
   4   9   1    1.31    0.42 
  -4   9  -1    1.40    0.46 
  -4   9  -1    1.16    0.42 
   4   9   1    1.43    0.44 
   5  -9   1   12.44    1.63 
   5  -9   1   10.19    1.65 
  -5  -9  -1    8.17    1.41 
   5  -9   1    7.85    1.41 
  -5  -9  -1   10.55    1.65 
   5  -9   1    9.53    1.39 
  -5  -9  -1   10.54    1.65 
   5  -9   1    8.81    1.36 
  -5  -9  -1   12.12    1.55 
   5   9   1   12.10    1.30 
  -5   9  -1    8.02    1.47 
   5   9   1   10.08    1.27 
  -5   9  -1    9.03    1.37 
   5   9   1    8.19    1.29 
  -5   9  -1    8.32    1.24 
  -6  -9  -1    4.63    0.99 
   6  -9   1    4.31    0.76 
   6  -9   1    3.17    0.88 
  -6  -9  -1    2.64    0.86 
   6  -9   1    3.03    0.74 
   6  -9   1    3.58    0.84 
  -6  -9  -1    4.06    0.83 
  -6  -9  -1    2.29    0.69 
   6  -9   1    4.35    1.02 
   6   9   1    2.84    0.70 
   6   9   1    5.34    0.80 
   6   9   1    5.62    0.78 
  -6   9  -1    4.92    0.77 
  -6   9  -1    3.37    0.74 
  -6   9  -1    2.75    0.83 
   7  -9   1    0.59    0.48 
  -7  -9  -1    0.63    0.41 
   7  -9   1    1.09    0.42 
   7  -9   1    0.24    0.51 
   7  -9   1    0.98    0.45 
  -7  -9  -1    1.46    0.68 
   7  -9   1   -0.05    0.40 
  -7  -9  -1    1.72    0.50 
  -7  -9  -1    1.31    0.55 
  -7  -9  -1    0.98    0.56 
   7   9   1    0.60    0.42 
  -7   9  -1    1.79    0.52 
   7   9   1    0.97    0.43 
   7   9   1    0.81    0.42 
  -7   9  -1   -0.70    0.37 
  -7   9  -1    0.75    0.34 
  -8  -9  -1    0.56    0.46 
   8  -9   1    0.47    0.48 
   8  -9   1    0.77    0.48 
  -8  -9  -1    0.05    0.40 
  -8  -9  -1   -0.10    0.31 
   8  -9   1    0.26    0.53 
   8  -9   1    0.95    0.38 
  -8  -9  -1    0.68    0.51 
   8  -9   1    0.58    0.39 
  -8  -9  -1   -0.25    0.46 
   8   9   1    0.90    0.39 
   8   9   1    0.72    0.40 
  -8   9  -1    0.07    0.26 
  -8   9  -1    0.60    0.43 
  -8   9  -1    0.14    0.49 
   9  -9   1    0.87    0.40 
   9  -9   1    0.53    0.44 
  -9  -9  -1    0.77    0.47 
   9  -9   1    0.70    0.59 
  -9  -9  -1    0.26    0.40 
  -9  -9  -1   -0.24    0.45 
  -9  -9  -1    0.32    0.40 
   9  -9   1    0.05    0.60 
  -9  -9  -1    1.11    0.59 
  -9   9  -1    0.54    0.36 
  -9   9  -1   -0.40    0.41 
   9   9   1    0.36    0.42 
  -9   9  -1    0.05    0.28 
   9   9   1    0.17    0.37 
  10  -9   1    0.09    0.49 
  10  -9   1    0.45    0.46 
  10  -9   1    0.44    0.65 
 -10  -9  -1    0.76    0.54 
 -10  -9  -1    0.12    0.42 
 -10  -9  -1    0.72    0.54 
  10  -9   1    0.23    0.34 
 -10  -9  -1    0.58    0.37 
 -10  -9  -1    0.53    0.61 
 -10   9  -1    0.78    0.32 
  10   9   1    0.03    0.43 
 -10   9  -1    0.36    0.42 
 -10   9  -1    0.83    0.58 
  10   9   1    0.51    0.38 
  11  -9   1    4.86    0.79 
  11  -9   1    3.33    0.99 
 -11  -9  -1    1.25    0.64 
 -11  -9  -1    3.13    0.85 
  11  -9   1    2.17    0.76 
  11  -9   1    4.66    1.05 
 -11  -9  -1    3.86    1.01 
 -11   9  -1    4.75    1.00 
  11   9   1    3.19    0.69 
 -11   9  -1    4.54    0.87 
  11   9   1    3.44    0.79 
 -12  -9  -1    2.17    0.82 
 -12  -9  -1    0.82    0.57 
  12  -9   1    1.61    0.52 
 -12  -9  -1    1.37    0.58 
  12  -9   1    0.92    0.67 
  12  -9   1    2.06    0.83 
 -12   9  -1    1.81    0.67 
  12   9   1    1.51    0.54 
  12   9   1    1.18    0.54 
 -12   9  -1    2.38    0.70 
 -13  -9  -1   10.30    1.47 
  13  -9   1    7.43    1.24 
  13  -9   1    9.34    1.63 
 -13  -9  -1    9.64    1.48 
  13  -9   1    7.78    1.61 
 -13  -9  -1    6.73    1.44 
  13   9   1    9.38    1.35 
 -13   9  -1    5.83    1.24 
 -13   9  -1    6.88    1.31 
  13   9   1    8.01    1.24 
  14  -9   1    3.01    0.94 
 -14  -9  -1    2.21    0.76 
 -14  -9  -1    3.15    1.00 
  14  -9   1    1.55    0.92 
  14  -9   1    3.65    0.74 
 -14  -9  -1    2.27    0.77 
  14   9   1    2.04    0.61 
 -14   9  -1    3.16    0.85 
 -14   9  -1    3.16    0.93 
  14   9   1    2.75    0.80 
 -15  -9  -1   -0.02    0.44 
 -15  -9  -1    0.46    0.51 
 -15  -9  -1   -0.32    0.59 
  15  -9   1    0.26    0.70 
  15  -9   1    0.20    0.62 
  15  -9   1    0.24    0.36 
 -15   9  -1    0.36    0.54 
 -15   9  -1   -0.46    0.48 
  15   9   1    0.17    0.39 
  15   9   1    0.52    0.61 
  16  -9   1    0.48    0.79 
  16  -9   1    0.91    0.73 
 -16  -9  -1   -0.27    0.70 
 -16  -9  -1    1.02    0.60 
 -16  -9  -1    0.82    0.56 
  16   9   1    0.48    0.52 
  16   9   1    0.94    0.53 
 -16   9  -1    0.80    0.59 
 -16   9  -1    1.37    0.58 
  14 -10  -1    1.47    0.76 
  14 -10  -1    1.40    0.81 
  14  10  -1    1.77    0.61 
  13 -10  -1    0.63    0.78 
  13 -10  -1   -0.47    0.40 
 -13 -10   1    0.97    0.88 
 -13 -10   1   -0.24    0.44 
 -13 -10   1    0.10    0.57 
  13 -10  -1    0.02    0.34 
  13 -10  -1    0.11    0.58 
  13 -10  -1    0.23    0.52 
 -13  10   1   -0.10    0.48 
  13  10  -1    0.33    0.48 
  13  10  -1    0.47    0.48 
 -13  10   1   -0.40    0.52 
 -12 -10   1    0.02    0.44 
  12 -10  -1    0.38    0.37 
 -12 -10   1    0.81    0.68 
  12 -10  -1    1.07    0.77 
 -12 -10   1    0.92    0.66 
  12 -10  -1    1.10    0.65 
  12 -10  -1    0.68    0.47 
  12 -10  -1    0.54    0.66 
  12  10  -1    0.29    0.52 
  12  10  -1    0.73    0.48 
 -12  10   1    0.40    0.56 
 -12  10   1    0.42    0.63 
 -11 -10   1    0.65    0.70 
  11 -10  -1    0.63    0.39 
  11 -10  -1   -0.41    0.57 
 -11 -10   1    0.26    0.47 
 -11 -10   1    0.96    0.63 
  11 -10  -1    0.82    0.54 
  11 -10  -1    1.91    0.59 
  11 -10  -1    0.22    0.74 
  11  10  -1    0.79    0.46 
 -11  10   1   -0.26    0.51 
 -11  10   1    0.40    0.52 
  11  10  -1    1.07    0.54 
  10 -10  -1    8.37    1.14 
 -10 -10   1    4.17    1.14 
  10 -10  -1    4.07    1.16 
 -10 -10   1    5.40    1.09 
 -10 -10   1    5.09    1.16 
  10 -10  -1    7.72    1.02 
  10 -10  -1    3.31    1.01 
  10 -10  -1    3.03    1.01 
  10  10  -1    6.76    1.06 
  10  10  -1    4.72    0.95 
 -10  10   1    3.99    1.00 
 -10  10   1    5.96    0.87 
 -10  10   1    6.74    1.16 
  -9 -10   1    0.58    0.63 
   9 -10  -1    0.27    0.34 
  -9 -10   1   -0.01    0.41 
  -9 -10   1   -0.25    0.40 
   9 -10  -1   -0.39    0.41 
   9 -10  -1    0.34    0.56 
   9 -10  -1   -0.44    0.30 
   9 -10  -1   -0.08    0.58 
   9  10  -1   -0.26    0.34 
  -9  10   1    0.54    0.57 
   9  10  -1   -0.25    0.33 
  -9  10   1    0.41    0.46 
  -9  10   1   -0.18    0.27 
  -8 -10   1    8.42    1.28 
   8 -10  -1    6.59    1.16 
  -8 -10   1   11.70    1.56 
  -8 -10   1    8.62    1.63 
   8 -10  -1    7.33    1.37 
  -8 -10   1    8.45    1.53 
   8 -10  -1    8.57    1.45 
   8 -10  -1    6.79    1.19 
  -8 -10   1    8.40    1.37 
   8 -10  -1    6.66    1.47 
   8  10  -1    6.80    1.15 
  -8  10   1    8.25    1.14 
   8  10  -1    9.39    1.31 
  -8  10   1    8.62    1.37 
  -8  10   1    6.27    1.27 
   7 -10  -1    0.40    0.55 
   7 -10  -1    0.15    0.35 
  -7 -10   1    0.74    0.60 
   7 -10  -1   -0.01    0.48 
  -7 -10   1    0.54    0.58 
  -7 -10   1    1.19    0.57 
   7 -10  -1   -0.32    0.55 
  -7 -10   1    0.44    0.47 
   7 -10  -1    0.91    0.40 
  -7  10   1    0.30    0.46 
   7  10  -1    0.28    0.44 
  -7  10   1    0.91    0.35 
  -7  10   1    1.17    0.49 
   7  10  -1    0.11    0.33 
   6 -10  -1    0.80    0.66 
   6 -10  -1    0.36    0.55 
   6 -10  -1    0.75    0.39 
  -6 -10   1   -0.08    0.38 
  -6 -10   1    0.93    0.64 
   6 -10  -1    0.66    0.42 
   6 -10  -1    0.32    0.53 
  -6 -10   1    0.30    0.47 
  -6 -10   1    0.35    0.57 
  -6  10   1    0.89    0.63 
   6  10  -1    0.37    0.40 
  -6  10   1    0.24    0.44 
  -6  10   1    0.97    0.40 
   6  10  -1    0.20    0.38 
  -5 -10   1    0.12    0.55 
  -5 -10   1   -0.15    0.41 
   5 -10  -1   -0.08    0.29 
  -5 -10   1   -0.42    0.31 
  -5 -10   1    0.29    0.54 
   5 -10  -1    0.44    0.42 
   5 -10  -1   -0.16    0.41 
   5 -10  -1    0.34    0.54 
   5 -10  -1    0.08    0.46 
  -5  10   1    0.04    0.52 
  -5  10   1    0.12    0.39 
  -5  10   1    0.29    0.35 
   5  10  -1    0.11    0.32 
   5  10  -1    0.10    0.36 
   4 -10  -1    0.66    0.61 
  -4 -10   1    0.69    0.52 
   4 -10  -1    1.07    0.51 
  -4 -10   1    1.02    0.59 
   4 -10  -1    1.14    0.63 
   4 -10  -1    0.62    0.42 
  -4 -10   1   -0.05    0.34 
   4 -10  -1    0.56    0.42 
  -4 -10   1   -1.06    0.50 
   4  10  -1    0.39    0.42 
   4  10  -1    1.21    0.49 
  -4  10   1   -0.21    0.47 
  -4  10   1    0.28    0.33 
  -4  10   1    1.90    0.54 
   4  10  -1    0.86    0.40 
   3 -10  -1    1.22    0.68 
  -3 -10   1    0.81    0.63 
   3 -10  -1    0.26    0.38 
  -3 -10   1    0.42    0.63 
   3 -10  -1    0.09    0.33 
  -3 -10   1    0.42    0.38 
   3 -10  -1    0.81    0.62 
  -3 -10   1   -0.07    0.40 
   3  10  -1    0.03    0.34 
  -3  10   1    0.10    0.36 
  -3  10   1    0.22    0.52 
  -3  10   1   -0.11    0.35 
   3  10  -1   -0.03    0.34 
  -2 -10   1    5.77    1.28 
   2 -10  -1    9.79    1.57 
  -2 -10   1    5.82    1.19 
   2 -10  -1    7.01    1.19 
   2 -10  -1    5.75    1.26 
  -2 -10   1    6.91    1.38 
   2 -10  -1    9.17    1.21 
  -2 -10   1    4.49    1.06 
   2  10  -1    7.88    1.15 
  -2  10   1    9.21    1.24 
   2  10  -1    9.04    1.23 
  -2  10   1    7.42    1.15 
   2  10  -1    8.47    1.41 
  -2  10   1    8.99    1.38 
  -1 -10   1    0.66    0.60 
   1 -10  -1    0.60    0.62 
  -1 -10   1    0.15    0.40 
   1 -10  -1    0.02    0.39 
  -1 -10   1    0.33    0.56 
  -1 -10   1    0.44    0.39 
   1 -10  -1    0.94    0.65 
   1 -10  -1    0.38    0.35 
  -1  10   1   -0.22    0.47 
   1  10  -1    0.09    0.34 
   1  10  -1    0.35    0.58 
  -1  10   1    0.30    0.36 
   1  10  -1    0.61    0.36 
  -1  10   1    0.43    0.36 
   0 -10   1   -0.45    0.35 
   0 -10   1   -0.18    0.36 
   0 -10  -1    0.05    0.43 
   0 -10  -1    0.21    0.31 
   0 -10  -1   -0.04    0.34 
   0 -10   1   -0.28    0.48 
   0 -10  -1   -0.34    0.46 
   0 -10   1    0.42    0.52 
   0  10   1   -0.28    0.27 
   0  10  -1   -0.48    0.48 
   0  10  -1   -0.26    0.26 
   0  10  -1    0.25    0.33 
   0  10   1   -0.53    0.25 
  -1 -10  -1    1.53    0.74 
   1 -10   1    1.72    0.60 
  -1 -10  -1    1.62    0.51 
  -1 -10  -1    1.95    0.72 
   1 -10   1    2.04    0.63 
   1 -10   1    1.13    0.51 
  -1 -10  -1    0.82    0.49 
   1 -10   1    0.92    0.59 
   1 -10   1    1.10    0.70 
  -1  10  -1    2.36    0.63 
  -1  10  -1    2.08    0.51 
   1  10   1    1.28    0.49 
  -1  10  -1    1.66    0.77 
   1  10   1    0.70    0.40 
  -2 -10  -1   12.91    2.18 
   2 -10   1   18.95    2.03 
  -2 -10  -1   16.84    2.31 
   2 -10   1   18.00    2.30 
   2 -10   1   13.27    2.18 
  -2 -10  -1   18.46    2.01 
   2 -10   1   16.23    1.97 
  -2 -10  -1   16.21    2.11 
   2 -10   1   15.49    2.01 
  -2  10  -1   16.58    1.84 
  -2  10  -1   11.18    1.87 
   2  10   1   12.06    1.83 
   2  10   1   10.55    1.84 
  -2  10  -1   16.60    2.17 
   3 -10   1    0.20    0.39 
  -3 -10  -1    1.15    0.66 
   3 -10   1    0.82    0.55 
   3 -10   1   -0.17    0.32 
   3 -10   1    0.15    0.47 
  -3 -10  -1    0.52    0.41 
  -3 -10  -1    0.12    0.33 
  -3 -10  -1    0.20    0.47 
   3 -10   1    0.46    0.56 
  -3  10  -1    0.16    0.37 
  -3  10  -1   -0.10    0.27 
   3  10   1    0.63    0.39 
   3  10   1    1.04    0.44 
  -3  10  -1   -0.27    0.55 
  -4 -10  -1    1.83    0.57 
   4 -10   1    0.71    0.57 
   4 -10   1    0.64    0.61 
   4 -10   1    0.80    0.56 
  -4 -10  -1    0.17    0.55 
  -4 -10  -1    1.91    0.75 
   4 -10   1    1.79    0.58 
   4 -10   1    1.55    0.50 
  -4 -10  -1    1.47    0.56 
  -4  10  -1    0.92    0.41 
  -4  10  -1    1.55    0.54 
   4  10   1    1.47    0.47 
   4  10   1   -0.02    0.35 
   4  10   1    1.25    0.48 
  -4  10  -1    1.73    0.75 
   5 -10   1    0.08    0.53 
   5 -10   1    0.42    0.43 
  -5 -10  -1    0.12    0.55 
   5 -10   1    1.32    0.48 
  -5 -10  -1    0.21    0.42 
  -5 -10  -1    1.18    0.55 
   5 -10   1    0.37    0.56 
   5 -10   1    0.80    0.68 
  -5 -10  -1    0.33    0.56 
  -5  10  -1    0.49    0.39 
   5  10   1    0.27    0.34 
   5  10   1    1.34    0.47 
  -5  10  -1   -0.04    0.50 
  -5  10  -1    0.57    0.41 
   5  10   1    0.46    0.46 
  -6 -10  -1    3.07    0.71 
   6 -10   1    3.35    0.88 
  -6 -10  -1    1.75    0.84 
  -6 -10  -1    3.39    0.92 
   6 -10   1    2.47    0.69 
  -6 -10  -1    2.72    0.75 
   6 -10   1    3.40    0.66 
  -6 -10  -1    2.59    0.72 
   6 -10   1    2.52    0.77 
   6 -10   1    2.23    0.82 
  -6  10  -1    3.27    0.74 
  -6  10  -1    1.66    0.54 
   6  10   1    0.98    0.50 
  -6  10  -1    1.78    0.82 
   6  10   1    2.76    0.60 
   6  10   1    2.77    0.68 
  -7 -10  -1    0.08    0.47 
  -7 -10  -1   -0.25    0.44 
  -7 -10  -1    0.13    0.35 
  -7 -10  -1    0.42    0.38 
  -7 -10  -1    0.28    0.56 
   7 -10   1   -0.18    0.50 
   7 -10   1    0.29    0.38 
   7 -10   1    0.99    0.60 
   7 -10   1    0.00    0.32 
   7 -10   1   -0.17    0.35 
   7  10   1    0.26    0.37 
  -7  10  -1    0.27    0.28 
  -7  10  -1    0.70    0.42 
   7  10   1   -0.15    0.39 
  -7  10  -1   -0.61    0.53 
  -8 -10  -1    0.51    0.58 
   8 -10   1   -0.14    0.51 
   8 -10   1   -0.41    0.38 
  -8 -10  -1   -0.74    0.39 
   8 -10   1   -0.05    0.32 
   8 -10   1    0.12    0.40 
  -8 -10  -1   -0.21    0.38 
  -8 -10  -1    0.38    0.49 
   8 -10   1    0.27    0.55 
  -8 -10  -1   -0.12    0.51 
  -8  10  -1    0.42    0.56 
  -8  10  -1    0.19    0.31 
  -8  10  -1    0.45    0.45 
   8  10   1   -0.10    0.43 
   8  10   1    0.15    0.39 
  -9 -10  -1    0.96    0.54 
  -9 -10  -1    1.62    0.69 
   9 -10   1    1.56    0.76 
  -9 -10  -1    0.79    0.58 
   9 -10   1    1.23    0.63 
  -9 -10  -1    0.41    0.63 
   9 -10   1    1.11    0.46 
   9 -10   1    1.89    0.58 
  -9 -10  -1    1.96    0.63 
   9 -10   1    1.59    0.79 
  -9  10  -1    0.37    0.49 
  -9  10  -1    1.04    0.63 
   9  10   1    0.70    0.52 
  -9  10  -1    1.64    0.46 
   9  10   1    0.78    0.47 
  10 -10   1    0.80    0.62 
  10 -10   1    1.67    0.78 
  10 -10   1    1.18    0.73 
 -10 -10  -1    2.06    0.77 
 -10 -10  -1    1.45    0.63 
  10 -10   1    1.70    0.53 
 -10 -10  -1    0.84    0.74 
  10 -10   1    1.12    0.54 
  10  10   1    1.11    0.54 
 -10  10  -1    1.55    0.46 
  10  10   1    0.69    0.54 
 -10  10  -1    1.50    0.63 
 -10  10  -1    0.82    0.63 
  11 -10   1    0.53    0.41 
  11 -10   1    0.30    0.41 
  11 -10   1    0.15    0.60 
  11 -10   1    0.34    0.52 
 -11 -10  -1    0.19    0.59 
 -11 -10  -1   -0.43    0.38 
  11 -10   1    0.14    0.59 
 -11 -10  -1    0.43    0.57 
 -11  10  -1   -0.77    0.32 
  11  10   1    0.27    0.45 
 -11  10  -1    0.37    0.61 
  11  10   1   -0.17    0.43 
  12 -10   1   -0.63    0.67 
 -12 -10  -1    0.29    0.65 
  12 -10   1    0.56    0.37 
  12 -10   1    0.08    0.59 
  12 -10   1    0.42    0.51 
 -12 -10  -1   -0.56    0.46 
 -12 -10  -1    0.03    0.48 
 -12  10  -1   -0.10    0.52 
  12  10   1    0.52    0.50 
  12  10   1    0.10    0.51 
 -12  10  -1   -0.17    0.41 
  13 -10   1   -0.04    0.57 
  13 -10   1    0.50    0.60 
 -13 -10  -1    0.21    0.51 
 -13 -10  -1   -0.24    0.53 
  13 -10   1   -0.12    0.34 
  13 -10   1    0.40    0.71 
 -13 -10  -1   -0.46    0.71 
  13  10   1   -0.37    0.37 
 -13  10  -1   -0.37    0.50 
  13  10   1   -0.74    0.42 
 -13  10  -1    0.49    0.48 
  10 -11  -1    0.92    0.62 
  10 -11  -1    0.20    0.42 
  10  11  -1   -0.29    0.43 
 -10  11   1   -0.07    0.33 
 -10  11   1   -0.21    0.58 
  -9 -11   1    1.22    0.74 
   9 -11  -1    0.97    0.81 
  -9 -11   1    0.61    0.77 
   9 -11  -1    0.63    0.71 
  -9 -11   1    1.58    0.60 
   9 -11  -1    1.79    0.55 
   9 -11  -1    1.63    0.62 
  -9  11   1    1.84    0.72 
  -9  11   1    2.41    0.87 
   9  11  -1    0.89    0.53 
   9  11  -1    2.31    0.67 
  -9  11   1    0.66    0.44 
  -8 -11   1   -0.22    0.44 
   8 -11  -1   -0.06    0.37 
  -8 -11   1   -0.15    0.54 
   8 -11  -1    0.07    0.33 
   8 -11  -1    0.52    0.64 
  -8 -11   1    1.27    0.73 
   8 -11  -1    0.67    0.58 
  -8  11   1   -0.54    0.30 
   8  11  -1   -0.10    0.35 
  -8  11   1    0.53    0.61 
   8  11  -1    0.21    0.49 
  -8  11   1    0.21    0.43 
  -7 -11   1    4.88    0.91 
   7 -11  -1    5.50    0.91 
   7 -11  -1    4.31    1.17 
  -7 -11   1    3.59    1.06 
  -7 -11   1    4.04    1.11 
  -7 -11   1    4.97    0.98 
   7 -11  -1    4.33    0.94 
   7 -11  -1    3.71    1.06 
  -7  11   1    2.57    0.81 
  -7  11   1    4.17    1.04 
   7  11  -1    2.93    0.81 
  -7  11   1    4.30    0.83 
   6 -11  -1    0.11    0.44 
  -6 -11   1    0.38    0.73 
   6 -11  -1    0.76    0.69 
  -6 -11   1   -0.37    0.37 
   6 -11  -1    0.27    0.43 
   6 -11  -1    0.93    0.76 
  -6 -11   1    1.78    0.88 
  -6 -11   1    0.67    0.58 
  -6  11   1    0.73    0.46 
  -6  11   1    0.98    0.66 
  -6  11   1    0.91    0.45 
   6  11  -1    0.18    0.39 
  -5 -11   1    3.52    0.84 
  -5 -11   1    2.81    0.93 
   5 -11  -1    2.36    0.88 
  -5 -11   1    4.01    1.06 
   5 -11  -1    1.72    0.60 
   5 -11  -1    1.62    0.59 
  -5 -11   1    3.84    0.88 
   5 -11  -1    1.67    0.87 
  -5  11   1    1.64    0.57 
  -5  11   1    2.95    0.88 
  -5  11   1    2.51    0.74 
   5  11  -1    2.37    0.68 
  -4 -11   1   -0.31    0.56 
   4 -11  -1    0.57    0.46 
   4 -11  -1    0.10    0.64 
  -4 -11   1    0.31    0.44 
   4 -11  -1    0.17    0.57 
  -4 -11   1    0.71    0.53 
   4 -11  -1    0.37    0.48 
  -4 -11   1   -0.11    0.56 
  -4  11   1    0.23    0.44 
  -4  11   1    0.44    0.45 
   4  11  -1   -0.47    0.35 
  -4  11   1    0.53    0.57 
  -3 -11   1    8.06    1.34 
   3 -11  -1    7.46    1.53 
   3 -11  -1    7.69    1.30 
  -3 -11   1    8.63    1.33 
  -3 -11   1    6.81    1.49 
   3 -11  -1    7.45    1.24 
   3 -11  -1    8.35    1.59 
  -3 -11   1    7.58    1.57 
  -3  11   1    6.63    1.22 
   3  11  -1    6.89    1.19 
  -3  11   1    6.72    1.35 
   3  11  -1   11.05    1.31 
  -3  11   1    6.27    1.12 
  -2 -11   1    1.13    0.54 
   2 -11  -1    1.92    0.81 
  -2 -11   1    2.10    0.69 
  -2 -11   1    0.56    0.59 
   2 -11  -1    1.01    0.49 
  -2 -11   1    0.83    0.74 
   2 -11  -1    2.59    0.70 
   2 -11  -1    1.97    0.89 
   2  11  -1    1.61    0.53 
  -2  11   1    1.33    0.53 
  -2  11   1    2.03    0.56 
   2  11  -1    0.24    0.41 
  -1 -11   1    1.04    0.71 
   1 -11  -1    0.53    0.50 
   1 -11  -1    0.71    0.48 
   1 -11  -1    0.40    0.56 
  -1 -11   1    0.44    0.49 
  -1 -11   1    1.67    0.54 
  -1 -11   1    0.30    0.65 
   1 -11  -1    0.87    0.69 
   1  11  -1    0.05    0.40 
  -1  11   1    0.81    0.48 
  -1  11   1    0.44    0.49 
   1  11  -1    0.67    0.41 
   0 -11   1    0.55    0.53 
   0 -11  -1    1.13    0.74 
   0 -11   1    0.88    0.66 
   0 -11   1    1.26    0.49 
   0 -11  -1    0.77    0.54 
   0 -11  -1    1.16    0.48 
   0 -11  -1   -0.18    0.50 
   0 -11   1   -0.64    0.49 
   0  11  -1    1.11    0.47 
   0  11   1    0.37    0.40 
   0  11   1    0.43    0.45 
   0  11  -1    1.15    0.50 
  -1 -11  -1    3.05    1.02 
  -1 -11  -1    5.17    0.99 
   1 -11   1    2.67    0.99 
  -1 -11  -1    4.03    0.86 
   1 -11   1    3.01    0.85 
  -1 -11  -1    4.00    1.04 
   1 -11   1    4.23    0.88 
   1 -11   1    3.86    1.02 
   1  11   1    3.91    0.80 
  -1  11  -1    3.34    0.74 
  -1  11  -1    2.83    0.97 
  -1  11  -1    4.93    0.88 
   1  11   1    4.42    0.85 
  -2 -11  -1    0.20    0.38 
  -2 -11  -1   -0.29    0.30 
   2 -11   1    0.19    0.45 
   2 -11   1   -0.33    0.37 
   2 -11   1    0.38    0.58 
  -2 -11  -1    0.23    0.60 
   2 -11   1   -0.20    0.57 
  -2 -11  -1    0.88    0.68 
  -2  11  -1    0.21    0.34 
  -2  11  -1    0.39    0.45 
   2  11   1   -0.17    0.28 
   2  11   1   -0.34    0.35 
  -2  11  -1   -0.53    0.58 
   3 -11   1    0.98    0.51 
  -3 -11  -1    0.13    0.60 
   3 -11   1    1.12    0.51 
   3 -11   1    0.70    0.65 
  -3 -11  -1    1.12    0.77 
  -3 -11  -1    0.38    0.46 
   3 -11   1    0.59    0.67 
  -3 -11  -1    0.58    0.52 
   3  11   1    1.16    0.48 
  -3  11  -1   -0.68    0.57 
  -3  11  -1    1.07    0.47 
   3  11   1    0.56    0.43 
  -3  11  -1    0.17    0.40 
   4 -11   1   -0.30    0.58 
   4 -11   1   -0.05    0.44 
   4 -11   1    0.50    0.46 
  -4 -11  -1   -0.42    0.58 
  -4 -11  -1   -0.25    0.67 
  -4 -11  -1   -0.14    0.35 
  -4 -11  -1   -0.29    0.43 
   4 -11   1    0.14    0.58 
  -4  11  -1    0.08    0.34 
  -4  11  -1   -0.51    0.60 
   4  11   1   -0.49    0.34 
   4  11   1   -0.16    0.33 
  -4  11  -1    0.31    0.43 
  -5 -11  -1    2.70    1.02 
  -5 -11  -1    3.78    0.88 
  -5 -11  -1    2.81    1.02 
   5 -11   1    2.52    0.84 
   5 -11   1    2.82    0.73 
  -5 -11  -1    3.46    0.85 
   5 -11   1    2.30    0.97 
   5 -11   1    3.84    0.87 
  -5  11  -1    2.34    0.89 
  -5  11  -1    3.23    0.74 
   5  11   1    1.91    0.67 
  -5  11  -1    3.28    0.79 
   6 -11   1    8.35    1.66 
  -6 -11  -1    9.00    1.46 
   6 -11   1    4.74    1.34 
  -6 -11  -1    8.88    1.71 
  -6 -11  -1   10.63    1.49 
   6 -11   1    6.70    1.28 
   6 -11   1    7.40    1.29 
  -6 -11  -1    9.67    1.68 
  -6 -11  -1    9.64    1.43 
  -6  11  -1    7.08    1.18 
  -6  11  -1   10.15    1.45 
  -6  11  -1    9.20    1.54 
   6  11   1    7.56    1.26 
  -7 -11  -1    4.42    1.14 
   7 -11   1    3.46    1.08 
   7 -11   1    5.13    1.11 
  -7 -11  -1    4.14    0.96 
  -7 -11  -1    3.28    1.06 
  -7 -11  -1    3.42    0.97 
   7 -11   1    7.21    1.01 
  -7 -11  -1    2.33    0.84 
   7 -11   1    5.64    1.21 
   7 -11   1    2.90    0.84 
   7  11   1    6.03    0.96 
  -7  11  -1    2.88    1.00 
  -7  11  -1    5.87    1.02 
   7  11   1    4.20    0.89 
  -7  11  -1    3.56    0.76 
  -8 -11  -1    0.82    0.75 
  -8 -11  -1    1.15    0.57 
   8 -11   1    1.04    0.75 
  -8 -11  -1    2.28    0.78 
  -8 -11  -1    0.69    0.69 
  -8 -11  -1    0.39    0.51 
   8 -11   1    0.49    0.67 
   8 -11   1    0.90    0.51 
   8 -11   1    1.19    0.50 
   8 -11   1    0.56    0.62 
  -8  11  -1    1.29    0.74 
   8  11   1    1.86    0.64 
  -8  11  -1    1.27    0.61 
   8  11   1    0.71    0.48 
  -8  11  -1    2.13    0.53 
   9 -11   1    5.06    1.29 
  -9 -11  -1    5.88    1.23 
  -9 -11  -1    5.95    1.07 
  -9 -11  -1    3.74    1.23 
   9 -11   1    4.85    1.17 
   9 -11   1    5.36    0.92 
   9 -11   1    5.08    1.10 
   9 -11   1    3.98    0.96 
   9  11   1    2.84    0.79 
   9  11   1    4.80    0.97 
  -9  11  -1    5.22    1.12 
  -9  11  -1    3.23    0.76 
  -9  11  -1    4.21    0.97 
 -25   0   2    0.33    0.35 
  25   0  -2    1.09    1.01 
  25   0  -2    0.07    0.70 
 -24   0   2    6.55    1.01 
  24   0  -2    7.26    1.69 
  24   0  -2    5.24    1.31 
  24   0  -2    5.41    1.07 
  23   0  -2    0.07    0.77 
 -23   0   2   -0.23    0.31 
  23   0  -2   -0.18    0.45 
  23   0  -2    0.39    0.63 
  22   0  -2    3.67    0.90 
  22   0  -2    1.93    1.04 
  22   0  -2    2.11    0.63 
 -22   0   2    2.10    0.56 
 -21   0   2    0.05    0.26 
 -21   0   2    0.26    0.30 
  21   0  -2   -0.14    0.38 
  21   0  -2    0.29    0.66 
  21   0  -2    0.30    0.45 
 -20   0   2    8.76    1.10 
  20   0  -2    5.73    1.15 
  20   0  -2    8.21    1.59 
  20   0  -2    5.83    1.02 
 -20   0   2    6.65    1.01 
  19   0  -2   -0.09    0.37 
  19   0  -2    0.90    0.67 
 -19   0   2    0.18    0.30 
  19   0  -2    0.14    0.37 
  19   0  -2    0.44    0.28 
 -19   0   2    0.09    0.23 
  18   0  -2   25.33    2.46 
  18   0  -2   25.15    2.61 
  18   0  -2   19.50    3.02 
 -18   0   2   28.30    2.76 
  18   0  -2   21.03    2.75 
 -18   0   2   22.50    2.58 
 -17   0   2   -0.05    0.24 
  17   0  -2   -0.02    0.26 
 -17   0   2   -0.03    0.22 
 -17   0   2    0.27    0.25 
  17   0  -2   -0.68    0.42 
  17   0  -2    0.32    0.35 
  17   0  -2    0.59    0.38 
 -17   0   2    0.27    0.26 
  16   0  -2    0.43    0.37 
 -16   0   2    0.75    0.21 
  16   0  -2    0.03    0.29 
  16   0  -2    0.20    0.25 
 -16   0   2    0.71    0.29 
 -16   0   2    0.89    0.32 
 -16   0   2    0.54    0.29 
 -16   0   2    0.47    0.25 
  16   0  -2    0.04    0.38 
  15   0  -2    0.11    0.21 
  15   0  -2    0.17    0.29 
 -15   0   2   -0.07    0.23 
 -15   0   2   -0.25    0.17 
  15   0  -2   -0.48    0.33 
 -15   0   2    0.00    0.16 
 -15   0   2    0.00    0.19 
  15   0  -2   -0.32    0.24 
 -15   0   2    0.39    0.23 
 -15   0   2    0.19    0.13 
 -14   0   2   12.61    1.49 
 -14   0   2   16.30    1.60 
 -14   0   2   15.13    1.49 
  14   0  -2   14.01    1.93 
 -14   0   2   12.42    1.66 
 -14   0   2   13.67    1.44 
 -14   0   2   13.08    1.57 
  14   0  -2   14.50    1.45 
  14   0  -2   12.33    1.62 
  14   0  -2   12.84    1.53 
  14   0  -2   13.36    1.62 
  13   0  -2   -0.01    0.37 
  13   0  -2   -0.23    0.17 
 -13   0   2    0.18    0.20 
 -13   0   2    0.36    0.19 
  13   0  -2    0.01    0.23 
  13   0  -2    0.13    0.22 
 -13   0   2    0.36    0.21 
 -13   0   2    0.27    0.21 
 -13   0   2    0.24    0.13 
 -13   0   2    0.18    0.17 
  13   0  -2    0.07    0.21 
 -12   0   2   70.67    7.31 
  12   0  -2   63.45    7.23 
 -12   0   2   61.07    7.46 
  12   0  -2   71.29    6.74 
  12   0  -2   74.01    6.65 
  12   0  -2   64.05    7.48 
 -12   0   2   64.66    6.37 
 -12   0   2   76.14    7.90 
 -12   0   2   73.61    7.02 
 -12   0   2   73.10    7.03 
  12   0  -2   73.87    7.22 
 -12   0   2   73.51    6.67 
  11   0  -2    0.10    0.18 
  11   0  -2    0.06    0.17 
 -11   0   2   -0.11    0.14 
  11   0  -2   -0.12    0.12 
  11   0  -2   -0.28    0.27 
 -11   0   2    0.09    0.18 
 -11   0   2    0.02    0.13 
 -11   0   2    0.00    0.14 
 -11   0   2    0.01    0.13 
  11   0  -2    0.04    0.05 
 -11   0   2   -0.01    0.10 
  11   0  -2   -0.33    0.16 
 -11   0   2    0.09    0.06 
  10   0  -2   48.20    4.66 
  10   0  -2   51.47    4.59 
  10   0  -2   49.22    4.98 
  10   0  -2   52.38    5.05 
 -10   0   2   49.60    4.40 
 -10   0   2   48.97    4.60 
 -10   0   2   47.45    4.83 
 -10   0   2   47.50    5.16 
  10   0  -2   53.92    5.18 
 -10   0   2   41.27    5.42 
 -10   0   2   46.58    5.04 
  10   0  -2   44.48    4.38 
   9   0  -2   -0.10    0.11 
   9   0  -2    0.26    0.14 
   9   0  -2    0.01    0.10 
  -9   0   2   -0.05    0.06 
  -9   0   2    0.02    0.14 
  -9   0   2   -0.04    0.10 
  -9   0   2   -0.04    0.08 
   9   0  -2   -0.40    0.22 
   9   0  -2    0.03    0.05 
  -9   0   2    0.01    0.10 
  -9   0   2    0.03    0.10 
   9   0  -2    0.09    0.19 
   8   0  -2    1.88    0.31 
   8   0  -2    1.80    0.21 
   8   0  -2    2.12    0.36 
  -8   0   2    1.03    0.27 
  -8   0   2    1.95    0.33 
   8   0  -2    1.88    0.32 
  -8   0   2    1.47    0.30 
  -8   0   2    1.68    0.24 
  -8   0   2    1.89    0.31 
   8   0  -2    2.15    0.33 
   8   0  -2    2.36    0.29 
   8   0  -2    1.39    0.39 
  -8   0   2    2.43    0.22 
   7   0  -2    0.06    0.09 
   7   0  -2    0.00    0.10 
  -7   0   2   -0.06    0.10 
   7   0  -2    0.01    0.11 
  -7   0   2   -0.10    0.06 
  -7   0   2    0.01    0.07 
   7   0  -2   -0.04    0.06 
   7   0  -2   -0.23    0.11 
   7   0  -2   -0.27    0.17 
  -7   0   2   -0.09    0.12 
   7   0  -2   -0.15    0.14 
  -7   0   2    0.07    0.12 
  -7   0   2   -0.17    0.08 
  -6   0   2  302.85   28.36 
  -6   0   2  339.33   33.87 
  -6   0   2  276.32   31.29 
  -6   0   2  310.71   30.32 
   6   0  -2  301.34   30.29 
   6   0  -2  301.02   28.36 
   6   0  -2  321.80   28.58 
   6   0  -2  291.61   30.32 
   6   0  -2  319.57   27.68 
  -6   0   2  276.49   27.68 
  -5   0   2   -0.04    0.04 
   5   0  -2    0.10    0.07 
   5   0  -2    0.04    0.08 
   5   0  -2   -0.01    0.04 
  -5   0   2    0.17    0.08 
  -5   0   2   -0.08    0.06 
  -5   0   2   -0.03    0.11 
   5   0  -2   -0.27    0.11 
   5   0  -2    0.00    0.06 
  -5   0   2   -0.03    0.08 
  -5   0   2   -0.12    0.05 
   5   0  -2    0.10    0.10 
   5   0  -2   -0.01    0.11 
   4   0  -2    0.05    0.06 
  -4   0   2    0.17    0.07 
  -4   0   2    0.02    0.06 
   4   0  -2    0.08    0.07 
  -4   0   2   -0.05    0.10 
  -4   0   2    0.03    0.06 
   4   0  -2    0.65    0.11 
  -4   0   2    0.08    0.07 
   4   0  -2   -0.01    0.07 
   4   0  -2    0.11    0.04 
  -4   0   2   -0.03    0.08 
   4   0  -2    0.04    0.12 
   4   0  -2    0.05    0.10 
   4   0  -2    0.06    0.10 
  -3   0   2    0.06    0.06 
  -3   0   2   -0.04    0.09 
  -3   0   2   -0.08    0.05 
   3   0  -2   -0.03    0.05 
  -3   0   2    0.03    0.08 
   3   0  -2    0.06    0.07 
  -3   0   2   -0.07    0.05 
   3   0  -2    0.00    0.05 
   3   0  -2    0.58    0.12 
   3   0  -2    0.10    0.11 
   3   0  -2   -0.04    0.08 
   3   0  -2   -0.02    0.05 
  -3   0   2   -0.05    0.05 
  -3   0   2   -0.09    0.07 
  -2   0   2    2.89    0.43 
   2   0  -2    3.46    0.39 
   2   0  -2    3.79    0.40 
   2   0  -2    3.61    0.40 
  -2   0   2    3.89    0.38 
   2   0  -2    4.31    0.44 
  -2   0   2    3.48    0.40 
   2   0  -2    4.02    0.41 
  -2   0   2    3.75    0.39 
  -2   0   2    3.47    0.42 
   2   0  -2    3.85    0.38 
  -2   0   2    3.99    0.42 
   2   0  -2    4.41    0.42 
   1   0  -2    0.06    0.04 
  -1   0   2    0.00    0.05 
  -1   0   2    0.06    0.04 
   1   0  -2    0.04    0.05 
  -1   0   2    0.02    0.03 
   1   0  -2   -0.03    0.03 
   1   0  -2    0.03    0.04 
  -1   0   2   -0.02    0.04 
   1   0  -2    0.03    0.05 
   1   0  -2   -0.06    0.03 
  -1   0   2    0.04    0.04 
   1   0  -2   -0.03    0.03 
  -1   0   2   -0.05    0.04 
   1   0  -2    0.04    0.04 
   0   0   2  272.14   26.67 
   0   0   2  292.77   29.48 
   0   0   2  317.90   32.61 
   0   0   2  280.75   27.27 
   0   0   2  316.63   29.23 
   0   0   2  291.00   30.87 
   0   0  -2  299.59   27.28 
   0   0   2  274.07   30.12 
   1   0   2    0.01    0.05 
  -1   0  -2   -0.07    0.05 
   1   0   2   -0.01    0.06 
   1   0   2   -0.07    0.04 
  -1   0  -2   -0.09    0.03 
  -1   0  -2   -0.12    0.06 
  -1   0  -2    0.01    0.05 
  -1   0  -2    0.02    0.05 
   1   0   2   -0.03    0.06 
  -1   0  -2    0.02    0.07 
  -1   0  -2   -0.08    0.04 
   1   0   2   -0.11    0.05 
   1   0   2    0.02    0.04 
   1   0   2   -0.12    0.06 
  -2   0  -2    1.44    0.19 
  -2   0  -2    1.18    0.14 
  -2   0  -2    1.23    0.16 
   2   0   2    0.75    0.17 
  -2   0  -2    1.05    0.21 
  -2   0  -2    1.00    0.17 
   2   0   2    1.59    0.22 
  -2   0  -2    1.29    0.19 
  -2   0  -2    1.05    0.19 
   2   0   2    1.03    0.17 
   2   0   2    1.02    0.17 
   2   0   2    1.56    0.20 
  -2   0  -2    1.14    0.18 
   3   0   2   -0.12    0.05 
   3   0   2   -0.03    0.09 
  -3   0  -2    0.04    0.08 
   3   0   2   -0.08    0.08 
   3   0   2   -0.06    0.06 
  -3   0  -2    0.05    0.07 
  -3   0  -2   -0.13    0.07 
  -3   0  -2   -0.05    0.07 
  -3   0  -2    0.07    0.04 
  -3   0  -2    0.00    0.05 
  -3   0  -2   -0.02    0.08 
  -3   0  -2    0.13    0.08 
  -3   0  -2    0.00    0.14 
   3   0   2   -0.01    0.09 
   3   0   2    0.13    0.07 
   3   0   2   -0.03    0.13 
   4   0   2   40.20    3.91 
  -4   0  -2   46.89    4.69 
   4   0   2   43.46    4.45 
   4   0   2   43.25    4.23 
  -4   0  -2   47.38    4.26 
   4   0   2   39.40    4.25 
   4   0   2   48.29    4.70 
  -4   0  -2   38.15    3.96 
  -4   0  -2   40.84    4.44 
  -4   0  -2   43.76    3.92 
   4   0   2   39.05    4.26 
  -4   0  -2   34.03    4.21 
   4   0   2   36.94    3.95 
  -5   0  -2    0.12    0.09 
  -5   0  -2    0.07    0.11 
  -5   0  -2    0.02    0.10 
   5   0   2   -0.21    0.18 
   5   0   2    0.13    0.10 
   5   0   2   -0.07    0.09 
  -5   0  -2   -0.03    0.08 
   5   0   2    0.12    0.14 
  -5   0  -2   -0.02    0.10 
   5   0   2    0.08    0.08 
   6   0   2    9.62    1.01 
   6   0   2    8.88    0.99 
  -6   0  -2    8.35    0.99 
  -6   0  -2    9.18    0.88 
  -6   0  -2    6.64    0.97 
  -6   0  -2   10.33    0.97 
  -6   0  -2    7.80    1.04 
   6   0   2    8.41    0.86 
   6   0   2    9.68    0.91 
   6   0   2    8.49    1.05 
  -7   0  -2    0.16    0.13 
  -7   0  -2   -0.23    0.08 
   7   0   2   -0.20    0.10 
  -7   0  -2   -0.07    0.13 
   7   0   2   -0.09    0.09 
  -7   0  -2   -0.02    0.13 
   7   0   2   -0.13    0.11 
  -7   0  -2   -0.09    0.12 
   7   0   2   -0.06    0.15 
   7   0   2   -0.20    0.20 
  -7   0  -2   -0.12    0.04 
  -8   0  -2   12.90    1.20 
   8   0   2   12.49    1.35 
  -8   0  -2    9.88    1.08 
  -8   0  -2   13.30    1.34 
   8   0   2    9.67    1.43 
   8   0   2   12.23    1.33 
  -8   0  -2   11.23    1.40 
  -8   0  -2   12.50    1.09 
  -8   0  -2   11.68    1.27 
   8   0   2   11.03    1.21 
   8   0   2   12.63    1.17 
  -9   0  -2    0.22    0.14 
  -9   0  -2    0.02    0.13 
  -9   0  -2   -0.09    0.05 
   9   0   2    0.09    0.14 
   9   0   2   -0.02    0.10 
   9   0   2    0.04    0.15 
  -9   0  -2    1.45    0.29 
   9   0   2   -0.05    0.17 
   9   0   2    0.17    0.28 
  -9   0  -2    0.09    0.15 
  -9   0  -2    0.04    0.05 
  -9   0  -2   -0.12    0.11 
  10   0   2    2.87    0.51 
 -10   0  -2    4.41    0.57 
 -10   0  -2    3.39    0.59 
  10   0   2    3.43    0.60 
 -10   0  -2    4.42    0.39 
 -10   0  -2    3.67    0.38 
  10   0   2    4.39    0.50 
 -10   0  -2    5.38    0.61 
  10   0   2    2.55    0.55 
 -10   0  -2    4.34    0.55 
  10   0   2    2.89    0.68 
 -10   0  -2    5.12    0.63 
 -11   0  -2   -0.07    0.16 
  11   0   2    0.15    0.17 
  11   0   2    0.22    0.22 
  11   0   2   -0.22    0.11 
 -11   0  -2   -0.22    0.12 
 -11   0  -2    0.02    0.16 
  11   0   2    0.08    0.18 
  11   0   2    0.18    0.36 
 -11   0  -2    0.00    0.18 
 -11   0  -2    0.02    0.14 
 -11   0  -2   -0.12    0.15 
 -12   0  -2   50.36    5.26 
  12   0   2   53.78    4.91 
  12   0   2   49.27    5.39 
 -12   0  -2   51.99    4.95 
 -12   0  -2   58.44    5.50 
 -12   0  -2   41.02    5.85 
 -12   0  -2   45.68    5.21 
  12   0   2   54.57    5.00 
  12   0   2   45.66    5.43 
  12   0   2   60.49    5.63 
 -12   0  -2   58.32    5.61 
  13   0   2    0.12    0.19 
 -13   0  -2    0.31    0.20 
 -13   0  -2    0.37    0.23 
 -13   0  -2    0.20    0.19 
  13   0   2    0.07    0.35 
  13   0   2    0.36    0.18 
 -13   0  -2    0.12    0.20 
  13   0   2    0.13    0.21 
  13   0   2    0.04    0.26 
 -13   0  -2    0.37    0.21 
 -13   0  -2    0.42    0.22 
  14   0   2   84.77    9.61 
 -14   0  -2   93.18    9.42 
 -14   0  -2   98.99    8.86 
  14   0   2   85.07    8.90 
  14   0   2   89.97    9.66 
  14   0   2  103.41    8.80 
 -14   0  -2  108.30    9.38 
 -14   0  -2   92.29    9.76 
 -14   0  -2   80.88   10.52 
  15   0   2    0.62    0.49 
 -15   0  -2    0.38    0.25 
  15   0   2    0.44    0.21 
 -15   0  -2    0.50    0.28 
 -15   0  -2    0.09    0.19 
 -15   0  -2    0.22    0.24 
  15   0   2    0.36    0.26 
  15   0   2    0.28    0.31 
 -15   0  -2    0.56    0.27 
  16   0   2   12.87    1.16 
  16   0   2    9.90    1.66 
 -16   0  -2   11.30    1.21 
 -16   0  -2   10.32    1.31 
  16   0   2   10.80    1.50 
 -16   0  -2    8.90    1.37 
  16   0   2   12.77    1.27 
 -16   0  -2   10.23    1.32 
 -16   0  -2   10.42    1.28 
 -16   0  -2    7.98    1.24 
 -17   0  -2   -0.19    0.22 
  17   0   2   -0.07    0.36 
  17   0   2    0.50    0.60 
  17   0   2    0.29    0.22 
 -17   0  -2    0.39    0.28 
 -17   0  -2    0.11    0.24 
 -17   0  -2    0.21    0.27 
 -17   0  -2    0.16    0.23 
  17   0   2   -0.13    0.26 
  18   0   2    0.67    0.25 
  18   0   2    0.24    0.56 
 -18   0  -2    0.50    0.32 
  18   0   2    1.63    0.41 
 -18   0  -2    0.10    0.31 
 -18   0  -2    0.33    0.31 
 -18   0  -2    0.20    0.29 
 -18   0  -2    0.26    0.26 
  18   0   2    0.04    0.37 
 -19   0  -2   -0.02    0.28 
 -19   0  -2    0.10    0.27 
  19   0   2    0.11    0.43 
 -19   0  -2   -0.08    0.28 
  19   0   2   -0.07    0.29 
  19   0   2    0.26    0.57 
 -19   0  -2   -0.13    0.27 
  20   0   2    2.91    0.93 
 -20   0  -2    4.72    0.85 
 -20   0  -2    4.64    0.85 
  20   0   2    4.20    0.78 
  20   0   2    4.32    1.15 
 -20   0  -2    5.77    0.82 
 -21   0  -2    0.12    0.34 
  21   0   2   -0.07    0.38 
 -21   0  -2    0.24    0.32 
  21   0   2    1.23    0.65 
  21   0   2   -0.24    0.64 
 -22   0  -2    5.71    0.90 
  22   0   2    4.36    1.10 
  22   0   2    5.13    0.91 
  22   0   2    4.90    1.38 
 -22   0  -2    6.91    1.05 
 -23   0  -2   -0.07    0.31 
 -23   0  -2    0.01    0.37 
  23   0   2   -0.51    0.57 
  23   0   2   -0.35    0.74 
  24   0   2    0.97    0.97 
  24   0   2    0.30    0.71 
 -24   0  -2    0.53    0.45 
 -24   0  -2    1.01    0.45 
  25   0   2    0.17    0.88 
  25   0   2   -0.32    0.73 
 -25   0  -2    0.20    0.35 
 -25   0  -2    0.62    0.43 
  25  -1  -2    1.22    1.05 
 -25  -1   2    1.97    0.59 
  25  -1  -2    4.60    1.22 
  25   1  -2    1.42    1.05 
  25   1  -2    3.21    0.83 
  25   1  -2    4.54    1.16 
 -25   1   2    4.02    0.77 
 -24  -1   2    2.02    0.55 
  24  -1  -2    1.97    0.90 
  24  -1  -2    2.94    1.28 
  24   1  -2    2.12    0.86 
  24   1  -2    1.96    1.00 
 -24   1   2    3.06    0.70 
 -24   1   2    2.28    0.61 
  24   1  -2    2.66    0.72 
  23  -1  -2    8.32    1.58 
  23  -1  -2   10.70    1.97 
 -23  -1   2    8.19    1.23 
  23   1  -2    8.62    1.51 
 -23   1   2    8.67    1.29 
  23   1  -2   11.32    2.00 
  23   1  -2   10.07    1.43 
 -23   1   2    9.07    1.34 
  22  -1  -2    8.45    1.25 
 -22  -1   2    8.31    1.19 
 -22  -1   2    9.30    1.34 
  22  -1  -2    9.02    1.56 
  22  -1  -2    5.78    1.57 
  22   1  -2    6.79    1.64 
  22   1  -2   11.39    1.60 
 -22   1   2    8.46    1.29 
  22   1  -2    8.48    1.35 
 -22   1   2   10.12    1.28 
 -21  -1   2    8.22    1.04 
  21  -1  -2    7.14    1.08 
  21  -1  -2    6.61    1.31 
 -21  -1   2    7.51    1.13 
  21  -1  -2    8.65    1.63 
  21   1  -2    4.56    1.09 
  21   1  -2    5.45    1.46 
 -21   1   2    8.18    1.11 
  21   1  -2    5.47    1.05 
 -21   1   2    7.25    1.08 
  20  -1  -2   -0.04    0.47 
  20  -1  -2    0.65    0.37 
 -20  -1   2   -0.35    0.22 
  20  -1  -2   -0.40    0.56 
 -20  -1   2   -0.03    0.28 
  20   1  -2   -0.16    0.45 
 -20   1   2    0.38    0.27 
  20   1  -2   -0.24    0.29 
 -20   1   2   -0.28    0.24 
  20   1  -2    0.45    0.39 
  20   1  -2    0.11    0.57 
  19  -1  -2    0.68    0.42 
 -19  -1   2    0.96    0.35 
  19  -1  -2   -0.18    0.42 
 -19  -1   2    0.81    0.35 
 -19  -1   2    0.62    0.33 
  19  -1  -2   -0.04    0.56 
  19   1  -2    1.43    0.71 
  19   1  -2    0.39    0.40 
 -19   1   2    1.26    0.38 
  19   1  -2    1.09    0.38 
  19   1  -2    1.46    0.52 
 -19   1   2    0.88    0.35 
 -18  -1   2    4.28    0.69 
  18  -1  -2    4.11    1.09 
 -18  -1   2    4.91    0.82 
  18  -1  -2    5.09    0.81 
 -18  -1   2    4.36    0.78 
  18  -1  -2    3.29    0.82 
 -18  -1   2    3.45    0.67 
  18  -1  -2    4.61    0.64 
  18   1  -2    5.99    0.77 
 -18   1   2    3.89    0.72 
  18   1  -2    3.24    0.97 
 -18   1   2    4.38    0.75 
  18   1  -2    3.90    0.80 
  18   1  -2    4.44    0.84 
  17  -1  -2   24.97    2.53 
 -17  -1   2   25.62    2.84 
  17  -1  -2   24.15    3.04 
 -17  -1   2   26.70    3.06 
  17  -1  -2   27.08    2.93 
  17  -1  -2   23.61    2.64 
 -17  -1   2   30.15    2.87 
 -17  -1   2   27.94    2.71 
 -17   1   2   26.06    2.73 
  17   1  -2   24.74    2.72 
  17   1  -2   19.80    3.09 
  17   1  -2   18.52    2.79 
  17   1  -2   26.09    2.60 
 -17   1   2   26.50    2.87 
 -16  -1   2    1.05    0.41 
 -16  -1   2    1.76    0.40 
  16  -1  -2    2.06    0.58 
  16  -1  -2    2.14    0.40 
 -16  -1   2    1.74    0.45 
 -16  -1   2    1.62    0.41 
  16  -1  -2    3.21    0.85 
  16  -1  -2    2.71    0.56 
 -16   1   2    2.70    0.52 
  16   1  -2    2.56    0.58 
 -16   1   2    2.19    0.44 
 -16   1   2    2.17    0.47 
  16   1  -2    1.54    0.41 
  16   1  -2    2.08    0.73 
  16   1  -2    1.31    0.47 
  15  -1  -2    4.57    0.62 
  15  -1  -2    2.43    0.83 
 -15  -1   2    4.18    0.53 
  15  -1  -2    4.39    0.73 
 -15  -1   2    5.36    0.78 
 -15  -1   2    4.06    0.64 
  15  -1  -2    3.10    0.74 
 -15  -1   2    6.09    0.73 
 -15  -1   2    5.25    0.77 
  15   1  -2    4.25    0.67 
  15   1  -2    5.01    0.79 
  15   1  -2    4.80    0.81 
  15   1  -2    5.52    1.04 
 -15   1   2    4.00    0.68 
 -15   1   2    4.28    0.71 
 -15   1   2    4.49    0.65 
 -15   1   2    4.90    0.72 
 -14  -1   2    8.46    1.06 
  14  -1  -2    5.81    1.08 
  14  -1  -2    8.34    1.01 
  14  -1  -2    6.58    1.24 
  14  -1  -2    8.67    1.04 
 -14  -1   2    7.37    0.85 
 -14  -1   2    9.83    0.95 
  14  -1  -2    8.15    0.89 
 -14  -1   2    8.56    1.01 
 -14   1   2    8.37    1.04 
  14   1  -2    5.08    1.02 
  14   1  -2    6.45    1.23 
  14   1  -2    8.32    1.11 
 -14   1   2    7.86    0.94 
  14   1  -2    8.36    1.00 
 -14   1   2    7.31    0.97 
 -14   1   2    7.53    1.02 
  14   1  -2    8.59    1.12 
  13  -1  -2    1.21    0.41 
 -13  -1   2    0.90    0.29 
  13  -1  -2    1.25    0.34 
  13  -1  -2    1.42    0.30 
  13  -1  -2    0.86    0.51 
 -13  -1   2    2.17    0.42 
 -13  -1   2    2.66    0.39 
 -13  -1   2    1.54    0.24 
 -13  -1   2    1.77    0.40 
  13  -1  -2    1.60    0.34 
 -13  -1   2    1.00    0.31 
 -13   1   2    1.88    0.28 
 -13   1   2    1.23    0.31 
 -13   1   2    1.61    0.36 
  13   1  -2    1.43    0.57 
  13   1  -2    2.10    0.44 
 -13   1   2    0.99    0.28 
  13   1  -2    1.74    0.44 
 -13   1   2    1.23    0.33 
 -13   1   2    1.74    0.34 
  13   1  -2    1.54    0.38 
  13   1  -2    1.16    0.39 
  12  -1  -2    6.78    0.82 
 -12  -1   2    6.62    0.84 
 -12  -1   2    8.05    0.75 
  12  -1  -2    7.07    0.71 
 -12  -1   2    6.29    0.84 
 -12  -1   2    5.47    0.66 
  12  -1  -2    6.13    0.92 
  12  -1  -2    5.48    1.00 
  12  -1  -2    6.14    0.82 
 -12  -1   2    6.24    0.83 
 -12   1   2    4.76    0.70 
  12   1  -2    6.44    0.88 
 -12   1   2    7.07    0.83 
  12   1  -2    5.81    0.79 
 -12   1   2    6.35    0.77 
  12   1  -2    6.47    0.88 
  12   1  -2    5.77    1.03 
 -12   1   2    4.18    0.78 
  12   1  -2    5.25    0.59 
 -12   1   2    6.15    0.69 
  11  -1  -2   19.97    2.12 
 -11  -1   2   14.19    2.20 
  11  -1  -2   16.42    2.08 
  11  -1  -2   19.03    1.87 
 -11  -1   2   19.32    1.95 
  11  -1  -2   19.08    1.94 
 -11  -1   2   18.59    2.09 
 -11  -1   2   20.20    1.94 
  11  -1  -2   16.71    2.16 
 -11   1   2   19.54    2.01 
 -11   1   2   18.21    2.10 
  11   1  -2   19.79    2.16 
  11   1  -2   21.44    2.02 
  11   1  -2   18.49    1.77 
 -11   1   2   18.35    2.21 
 -11   1   2   19.89    1.88 
 -11   1   2   20.22    1.97 
  11   1  -2   21.82    1.95 
  11   1  -2   19.45    2.20 
  10  -1  -2   20.38    2.35 
 -10  -1   2   19.25    2.28 
  10  -1  -2   22.71    2.32 
 -10  -1   2   20.89    2.12 
  10  -1  -2   20.26    2.28 
 -10  -1   2   23.57    2.14 
  10  -1  -2   22.42    2.12 
  10  -1  -2   21.51    2.42 
  10  -1  -2   22.28    2.06 
 -10  -1   2   21.79    2.45 
  10   1  -2   19.64    2.15 
  10   1  -2   17.39    2.32 
 -10   1   2   20.99    2.16 
  10   1  -2   24.98    2.13 
 -10   1   2   21.36    2.20 
 -10   1   2   19.97    2.30 
  10   1  -2   19.97    2.15 
 -10   1   2   20.59    2.05 
  10   1  -2   19.63    1.95 
  10   1  -2   20.97    2.36 
 -10   1   2   20.35    2.42 
   9  -1  -2   47.10    5.39 
  -9  -1   2   41.27    5.40 
   9  -1  -2   49.10    4.36 
   9  -1  -2   46.67    4.60 
   9  -1  -2   44.07    5.11 
   9  -1  -2   47.33    4.96 
  -9  -1   2   45.20    5.02 
  -9  -1   2   47.74    4.60 
  -9  -1   2   47.04    4.80 
   9  -1  -2   44.27    4.96 
   9  -1  -2   50.62    4.54 
  -9   1   2   43.58    5.11 
   9   1  -2   50.02    4.59 
  -9   1   2   50.25    4.54 
   9   1  -2   56.62    5.17 
   9   1  -2   44.86    4.39 
   9   1  -2   57.44    4.83 
   9   1  -2   46.36    4.97 
   9   1  -2   46.42    4.64 
  -8  -1   2    1.15    0.26 
   8  -1  -2    0.98    0.15 
   8  -1  -2    1.07    0.23 
   8  -1  -2    1.46    0.31 
  -8  -1   2    0.95    0.25 
   8  -1  -2    1.58    0.39 
   8  -1  -2    1.24    0.27 
  -8  -1   2    1.32    0.19 
  -8  -1   2    1.20    0.27 
   8  -1  -2    1.09    0.22 
   8  -1  -2    1.47    0.24 
   8   1  -2    1.19    0.18 
  -8   1   2    1.01    0.20 
   8   1  -2    1.27    0.27 
   8   1  -2    0.88    0.26 
   8   1  -2    1.23    0.36 
  -8   1   2    1.66    0.25 
  -8   1   2    1.69    0.25 
   8   1  -2    1.71    0.21 
   8   1  -2    1.21    0.30 
   7  -1  -2    4.67    0.48 
  -7  -1   2    4.66    0.50 
   7  -1  -2    4.24    0.63 
   7  -1  -2    2.98    0.43 
   7  -1  -2    3.26    0.36 
   7  -1  -2    2.90    0.51 
  -7  -1   2    2.94    0.48 
   7  -1  -2    3.87    0.45 
  -7  -1   2    3.88    0.41 
   7  -1  -2    3.53    0.48 
  -7  -1   2    3.07    0.39 
  -7  -1   2    2.57    0.47 
  -7  -1   2    4.11    0.53 
  -7  -1   2    3.33    0.51 
   7   1  -2    4.79    0.41 
   7   1  -2    3.02    0.47 
   7   1  -2    3.99    0.39 
   7   1  -2    4.12    0.56 
  -7   1   2    3.75    0.42 
  -7   1   2    3.08    0.44 
   7   1  -2    4.35    0.54 
   7   1  -2    3.32    0.58 
  -7   1   2    3.35    0.46 
  -6  -1   2    1.65    0.30 
   6  -1  -2    1.26    0.24 
  -6  -1   2    1.06    0.23 
  -6  -1   2    1.10    0.17 
   6  -1  -2    1.21    0.21 
   6  -1  -2    1.54    0.22 
  -6  -1   2    1.63    0.27 
  -6  -1   2    1.15    0.24 
   6  -1  -2    0.99    0.30 
  -6  -1   2    1.27    0.25 
   6  -1  -2    1.53    0.22 
  -6  -1   2    1.25    0.20 
   6  -1  -2    1.20    0.27 
   6  -1  -2    1.14    0.15 
   6   1  -2    0.92    0.23 
   6   1  -2    1.52    0.27 
   6   1  -2    1.55    0.17 
  -6   1   2    1.17    0.19 
   6   1  -2    1.20    0.19 
   6   1  -2    1.46    0.32 
  -6   1   2    1.27    0.20 
  -6   1   2    0.92    0.20 
   6   1  -2    0.93    0.25 
   5  -1  -2   49.69    4.91 
  -5  -1   2   46.06    4.26 
  -5  -1   2   50.47    4.90 
   5  -1  -2   48.91    4.74 
   5  -1  -2   48.62    4.65 
   5  -1  -2   46.08    4.40 
  -5  -1   2   50.13    5.21 
  -5  -1   2   43.86    4.39 
   5  -1  -2   46.93    4.35 
  -5  -1   2   40.84    4.93 
   5  -1  -2   49.14    4.71 
  -5  -1   2   37.74    4.81 
   5  -1  -2   43.34    5.17 
   5   1  -2   46.84    4.44 
  -5   1   2   45.44    4.39 
  -5   1   2   38.49    5.17 
  -5   1   2   45.01    4.34 
  -5   1   2   48.86    4.90 
   5   1  -2   45.49    4.70 
   5   1  -2   43.14    4.39 
   5   1  -2   54.42    5.21 
   5   1  -2   49.16    4.25 
   4  -1  -2   10.97    1.10 
  -4  -1   2   11.45    1.06 
   4  -1  -2   10.79    1.08 
   4  -1  -2   10.82    1.19 
   4  -1  -2   11.27    1.19 
  -4  -1   2    9.16    1.22 
  -4  -1   2   11.06    1.22 
   4  -1  -2   12.14    1.20 
  -4  -1   2   10.02    1.12 
  -4  -1   2   14.08    1.22 
   4   1  -2   10.55    1.22 
  -4   1   2   10.87    1.09 
   4   1  -2    9.87    1.11 
   4   1  -2   10.34    1.05 
   4   1  -2   10.59    1.19 
  -4   1   2    9.72    1.19 
   4   1  -2   11.99    1.24 
  -4   1   2   11.61    1.07 
   4   1  -2   12.32    1.30 
   4   1  -2   12.38    1.15 
   3  -1  -2   17.04    2.23 
  -3  -1   2   20.70    1.87 
  -3  -1   2   20.29    1.96 
  -3  -1   2   18.49    2.14 
  -3  -1   2   19.74    1.93 
   3  -1  -2   20.17    2.05 
   3  -1  -2   22.25    1.89 
   3  -1  -2   18.89    2.12 
  -3  -1   2   21.93    2.11 
   3  -1  -2   20.61    1.91 
   3  -1  -2   19.60    2.06 
  -3  -1   2   20.70    2.27 
  -3   1   2   18.14    1.88 
   3   1  -2   18.12    2.26 
  -3   1   2   20.34    2.11 
   3   1  -2   24.20    2.12 
  -3   1   2   21.18    2.04 
   3   1  -2   21.04    1.96 
   3   1  -2   20.45    1.94 
  -3   1   2   16.79    2.23 
   3   1  -2   18.90    2.04 
   3   1  -2   20.95    1.87 
   2  -1  -2    0.55    0.12 
  -2  -1   2    0.49    0.13 
  -2  -1   2    0.07    0.11 
  -2  -1   2    0.86    0.15 
  -2  -1   2    0.72    0.15 
  -2  -1   2    0.42    0.12 
  -2  -1   2    0.36    0.11 
   2  -1  -2    0.65    0.08 
  -2  -1   2    0.45    0.08 
  -2  -1   2    0.38    0.12 
   2  -1  -2    0.41    0.11 
  -2  -1   2    0.37    0.11 
   2   1  -2    0.68    0.12 
  -2   1   2    0.45    0.08 
   2   1  -2    0.22    0.10 
   2   1  -2    0.56    0.13 
   2   1  -2    0.40    0.12 
   2   1  -2    0.68    0.15 
   2   1  -2    0.59    0.15 
   2   1  -2    0.99    0.18 
   2   1  -2    0.45    0.11 
   1  -1  -2    0.47    0.12 
  -1  -1   2    0.52    0.11 
  -1  -1   2    0.55    0.10 
  -1  -1   2    0.85    0.14 
  -1  -1   2    0.36    0.11 
  -1  -1   2    0.29    0.12 
   1  -1  -2    0.58    0.08 
   1  -1  -2    0.67    0.13 
  -1  -1   2    0.63    0.13 
  -1  -1   2    0.57    0.13 
   1  -1  -2    0.33    0.08 
  -1  -1   2    0.35    0.12 
  -1  -1   2    0.23    0.11 
   1  -1  -2    0.47    0.10 
  -1  -1   2    0.53    0.12 
  -1  -1   2    0.52    0.14 
   1   1  -2    0.21    0.11 
   1   1  -2    0.32    0.12 
   1   1  -2    0.38    0.09 
   1   1  -2    0.35    0.13 
  -1   1   2    0.37    0.08 
   1   1  -2    0.49    0.14 
   1   1  -2    0.34    0.11 
   1   1  -2    0.49    0.13 
   1   1  -2    0.38    0.12 
   1   1  -2    0.36    0.09 
  -1   1   2    0.31    0.10 
   0  -1   2  141.09   12.40 
   0  -1   2  137.39   12.13 
   0  -1  -2  134.60   13.70 
   0  -1  -2  141.69   13.88 
   0  -1   2  120.49   13.89 
   0  -1   2  130.73   13.27 
   0  -1  -2  131.52   14.01 
   0  -1  -2  126.71   13.20 
   0  -1  -2  144.00   12.48 
   0  -1   2  143.25   13.42 
   0  -1   2  118.20   14.81 
   0  -1   2  130.96   12.47 
   0  -1  -2  129.31   13.37 
   0   1  -2  136.22   13.89 
   0   1   2  124.19   14.80 
   0   1   2  130.38   14.01 
   0   1  -2  139.32   12.40 
   0   1  -2  111.25   12.47 
   0   1   2  125.13   13.88 
   0   1  -2  124.59   13.41 
   0   1  -2  135.69   12.13 
   0   1  -2  144.05   13.20 
   0   1  -2  147.32   14.82 
   0   1  -2  144.92   14.04 
   1  -1   2  136.41   15.29 
   1  -1   2  122.38   13.70 
  -1  -1  -2  130.79   13.71 
   1  -1   2  137.51   14.48 
  -1  -1  -2  139.96   12.88 
   1  -1   2  132.50   13.63 
   1  -1   2  118.15   14.33 
   1  -1   2  118.58   12.78 
   1  -1   2  135.92   12.51 
   1  -1   2  138.35   13.85 
  -1   1  -2  140.30   12.51 
   1   1   2  137.20   14.48 
   1   1   2  148.15   13.64 
   1   1   2  136.82   14.15 
  -1   1  -2  145.59   14.49 
   1   1   2  139.66   12.88 
  -1   1  -2  127.25   12.78 
  -1   1  -2  154.23   13.71 
  -1   1  -2  139.98   13.85 
  -1   1  -2  153.36   15.29 
  -1   1  -2  149.66   13.65 
   2  -1   2  291.86   28.02 
  -2  -1  -2  303.54   28.25 
   2  -1   2  319.53   27.43 
   2  -1   2  278.55   29.92 
  -2  -1  -2  305.47   29.93 
   2  -1   2  336.81   31.76 
  -2  -1  -2  296.58   30.06 
   2  -1   2  286.84   33.53 
  -2  -1  -2  312.40   31.76 
   2  -1   2  308.73   30.05 
   2  -1   2  295.14   30.35 
  -2  -1  -2  278.59   28.05 
  -2   1  -2  299.58   31.75 
   2   1   2  309.71   31.76 
  -2   1  -2  267.16   28.02 
  -2   1  -2  303.51   30.05 
  -2   1  -2  308.03   31.42 
  -2   1  -2  313.27   29.93 
   2   1   2  258.06   30.05 
   2   1   2  297.62   29.92 
   2   1   2  298.60   33.53 
   2   1   2  310.32   28.25 
   2   1   2  315.10   30.29 
  -2   1  -2  318.43   30.35 
   2   1   2  325.80   31.02 
  -2   1  -2  281.13   27.42 
   2   1   2  316.66   31.43 
   3  -1   2  226.73   21.41 
  -3  -1  -2  229.87   22.08 
   3  -1   2  221.91   21.61 
   3  -1   2  218.34   19.50 
  -3  -1  -2  226.09   19.96 
   3  -1   2  227.74   22.59 
   3  -1   2  193.71   22.03 
   3  -1   2  199.90   21.31 
   3  -1   2  189.27   20.06 
  -3  -1  -2  225.91   22.35 
  -3  -1  -2  229.15   21.33 
   3   1   2  231.87   22.60 
  -3   1  -2  218.65   21.32 
   3   1   2  211.07   21.31 
  -3   1  -2  184.81   21.37 
  -3   1  -2  217.63   22.59 
   3   1   2  183.40   19.95 
   3   1   2  226.38   20.11 
  -3   1  -2  209.41   23.85 
  -3   1  -2  216.57   19.50 
  -4  -1  -2    4.69    0.49 
  -4  -1  -2    4.39    0.56 
   4  -1   2    4.47    0.44 
   4  -1   2    4.67    0.56 
   4  -1   2    4.36    0.60 
  -4  -1  -2    4.86    0.58 
  -4  -1  -2    3.99    0.54 
  -4  -1  -2    3.45    0.51 
  -4  -1  -2    5.30    0.54 
   4  -1   2    4.63    0.54 
   4  -1   2    4.19    0.61 
   4  -1   2    4.86    0.45 
  -4   1  -2    4.53    0.52 
   4   1   2    3.26    0.58 
  -4   1  -2    3.20    0.52 
  -4   1  -2    4.24    0.46 
  -4   1  -2    4.55    0.43 
  -4   1  -2    4.99    0.44 
   4   1   2    3.56    0.53 
   4   1   2    4.46    0.50 
   4   1   2    3.74    0.54 
   4   1   2    4.25    0.50 
   4   1   2    4.90    0.49 
  -4   1  -2    5.29    0.57 
  -5  -1  -2    8.23    0.88 
   5  -1   2    6.75    0.91 
  -5  -1  -2    7.77    0.91 
  -5  -1  -2    9.05    0.75 
  -5  -1  -2    7.24    0.81 
   5  -1   2    7.39    0.93 
   5  -1   2    8.69    0.78 
   5  -1   2    6.76    0.74 
  -5  -1  -2    9.25    0.89 
   5  -1   2    7.15    0.89 
  -5  -1  -2    7.17    0.92 
   5   1   2    8.22    0.92 
  -5   1  -2    7.20    0.75 
  -5   1  -2    8.12    0.74 
  -5   1  -2    8.07    0.88 
   5   1   2    6.92    0.98 
  -5   1  -2    7.15    0.85 
  -5   1  -2    9.49    0.95 
   5   1   2    8.21    0.81 
   5   1   2    7.34    0.82 
  -5   1  -2    7.35    0.79 
   5   1   2    6.69    0.84 
  -6  -1  -2    6.67    0.83 
   6  -1   2    5.79    0.65 
  -6  -1  -2    6.09    0.79 
   6  -1   2    5.95    0.90 
  -6  -1  -2    6.88    0.80 
  -6  -1  -2    6.43    0.86 
  -6  -1  -2    7.15    0.75 
  -6  -1  -2    7.17    0.67 
   6  -1   2    7.41    0.86 
  -6  -1  -2    7.94    0.84 
   6  -1   2    6.59    0.71 
   6  -1   2    6.31    0.81 
  -6   1  -2    6.23    0.79 
  -6   1  -2    7.24    0.78 
   6   1   2    9.33    0.86 
   6   1   2    6.27    0.72 
   6   1   2    5.52    0.90 
   6   1   2    7.20    0.76 
  -6   1  -2    7.90    0.86 
  -6   1  -2    7.71    0.66 
  -6   1  -2    7.38    0.69 
  -6   1  -2    7.03    0.73 
   6   1   2    6.81    0.78 
   7  -1   2    1.67    0.43 
  -7  -1  -2    2.00    0.25 
   7  -1   2    2.03    0.41 
  -7  -1  -2    2.31    0.35 
   7  -1   2    1.98    0.30 
   7  -1   2    2.20    0.25 
   7  -1   2    2.16    0.34 
  -7  -1  -2    2.71    0.39 
  -7  -1  -2    2.48    0.38 
  -7  -1  -2    1.80    0.36 
  -7  -1  -2    2.43    0.40 
   7   1   2    2.02    0.37 
   7   1   2    1.52    0.30 
  -7   1  -2    2.10    0.22 
   7   1   2    1.89    0.33 
  -7   1  -2    2.14    0.28 
  -7   1  -2    2.24    0.36 
   7   1   2    2.04    0.46 
   7   1   2    2.09    0.35 
  -7   1  -2    2.22    0.35 
  -7   1  -2    2.82    0.39 
   8  -1   2   12.67    1.64 
   8  -1   2   15.98    1.48 
  -8  -1  -2   17.05    1.69 
   8  -1   2   13.48    1.66 
  -8  -1  -2   14.46    1.39 
  -8  -1  -2   14.56    1.76 
  -8  -1  -2   16.76    1.69 
  -8  -1  -2   15.99    1.60 
   8  -1   2   14.29    1.70 
  -8  -1  -2   12.62    1.49 
   8  -1   2   16.03    1.42 
  -8   1  -2   18.15    1.65 
  -8   1  -2   14.20    1.44 
  -8   1  -2   15.61    1.58 
   8   1   2   13.89    1.52 
  -8   1  -2   12.55    1.74 
   8   1   2   14.02    1.68 
   8   1   2   13.62    1.47 
   8   1   2   12.88    1.68 
   8   1   2   17.13    1.62 
  -9  -1  -2   31.59    3.94 
  -9  -1  -2   30.15    3.53 
   9  -1   2   28.12    3.24 
   9  -1   2   36.44    3.33 
   9  -1   2   38.63    3.67 
  -9  -1  -2   30.19    3.74 
   9  -1   2   36.02    3.74 
  -9  -1  -2   31.83    3.67 
   9  -1   2   34.25    3.69 
  -9  -1  -2   31.68    3.33 
  -9  -1  -2   40.54    3.20 
   9   1   2   34.04    3.59 
   9   1   2   33.50    3.37 
   9   1   2   33.50    3.30 
  -9   1  -2   39.90    3.95 
   9   1   2   32.50    3.67 
  -9   1  -2   34.93    3.53 
   9   1   2   35.27    3.77 
  -9   1  -2   41.32    3.68 
  -9   1  -2   35.69    3.28 
  10  -1   2    3.89    0.55 
 -10  -1  -2    4.16    0.65 
  10  -1   2    5.05    0.65 
 -10  -1  -2    3.85    0.58 
  10  -1   2    3.29    0.73 
  10  -1   2    4.43    0.74 
 -10  -1  -2    4.09    0.66 
 -10  -1  -2    4.47    0.66 
 -10  -1  -2    4.65    0.62 
  10  -1   2    4.10    0.47 
 -10   1  -2    3.89    0.58 
 -10   1  -2    3.31    0.59 
  10   1   2    6.06    0.74 
  10   1   2    5.14    0.83 
 -10   1  -2    4.31    0.53 
  10   1   2    4.66    0.57 
  10   1   2    4.57    0.66 
 -10   1  -2    3.75    0.61 
  10   1   2    4.85    0.65 
 -10   1  -2    4.90    0.68 
  11  -1   2   52.48    5.63 
  11  -1   2   69.60    6.29 
  11  -1   2   66.60    5.75 
 -11  -1  -2   58.43    6.46 
 -11  -1  -2   58.18    6.80 
 -11  -1  -2   65.97    6.11 
 -11  -1  -2   51.70    6.31 
 -11  -1  -2   59.52    5.74 
  11  -1   2   62.84    6.29 
 -11   1  -2   60.19    6.30 
 -11   1  -2   62.84    6.80 
 -11   1  -2   63.61    6.42 
  11   1   2   50.13    6.22 
  11   1   2   71.67    6.22 
 -11   1  -2   61.18    6.09 
 -11   1  -2   53.06    6.06 
 -11   1  -2   63.65    5.68 
  11   1   2   57.34    5.78 
  11   1   2   54.79    5.69 
  12  -1   2    0.02    0.29 
  12  -1   2   -0.26    0.22 
 -12  -1  -2    0.15    0.20 
 -12  -1  -2   -0.08    0.19 
 -12  -1  -2    0.25    0.19 
  12  -1   2   -0.07    0.17 
 -12  -1  -2   -0.16    0.14 
 -12  -1  -2    0.36    0.23 
  12  -1   2   -0.06    0.16 
  12  -1   2    0.12    0.13 
 -12  -1  -2    0.26    0.17 
 -12   1  -2   -0.18    0.16 
  12   1   2   -0.10    0.17 
  12   1   2    0.10    0.17 
  12   1   2    0.30    0.36 
 -12   1  -2    0.20    0.18 
 -12   1  -2    0.15    0.16 
 -12   1  -2   -0.07    0.17 
 -12   1  -2   -0.05    0.13 
 -12   1  -2    0.23    0.18 
 -12   1  -2    0.02    0.15 
  12   1   2   -0.10    0.18 
 -13  -1  -2    3.90    0.76 
 -13  -1  -2    6.68    0.88 
  13  -1   2    5.58    0.83 
  13  -1   2    5.37    0.62 
 -13  -1  -2    5.63    0.85 
  13  -1   2    5.75    0.73 
 -13  -1  -2    6.22    0.70 
  13  -1   2    5.34    0.93 
 -13  -1  -2    5.19    0.74 
  13  -1   2    3.41    0.89 
 -13  -1  -2    5.17    0.77 
 -13   1  -2    5.93    0.71 
 -13   1  -2    6.10    0.81 
  13   1   2    5.77    0.71 
 -13   1  -2    5.08    0.80 
 -13   1  -2    6.26    0.85 
 -13   1  -2    5.82    0.76 
  13   1   2    5.01    1.01 
 -13   1  -2    7.03    0.88 
  13   1   2    6.16    0.82 
 -13   1  -2    6.33    0.86 
  13   1   2    4.29    0.80 
  14  -1   2    5.69    0.79 
 -14  -1  -2    8.10    1.09 
  14  -1   2    5.86    1.09 
 -14  -1  -2    8.96    1.03 
 -14  -1  -2    7.21    0.90 
  14  -1   2    5.57    1.17 
 -14  -1  -2    8.01    0.90
[truncated: 12,465,633 more chars]
